# Supplementary material for: Gas Phase Conformation of Trisaccharides and Core Pentasaccharide: A Three-Step Tree-Based Sampling and Quantum Mechanical Computational Approach
Source: MDPI journal article supplement (doi:10.3390/molecules28248093), 2023-12-14
Supplement: s1 [file s1]

## Supplementary Information

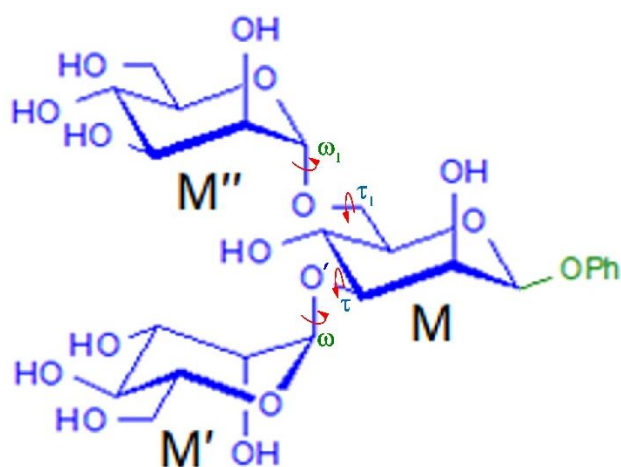

Figure S1. Structural formulas of  $\text{Man}\alpha(1,3)\text{Man}\alpha(1,6)\text{Man}$ . Here, glycosidic linkage torsion angles ( $\omega$ ,  $\tau$ ,  $\omega_1$  and  $\tau_1$ ) are used for distinguishing the structures of *cis*, *trans*, *cis* and *trans*, that is,  $\omega = \text{OM}'\text{-C1}'\text{-O}'\text{-C3}$ ,  $\tau = \text{C1}'\text{-O}'\text{-C3-C2}$ ,  $\omega_1 = \text{OM}''\text{-C1}''\text{-O-C6}$ ,  $\tau_1 = \text{C1}''\text{-O-C6-C5}$ .

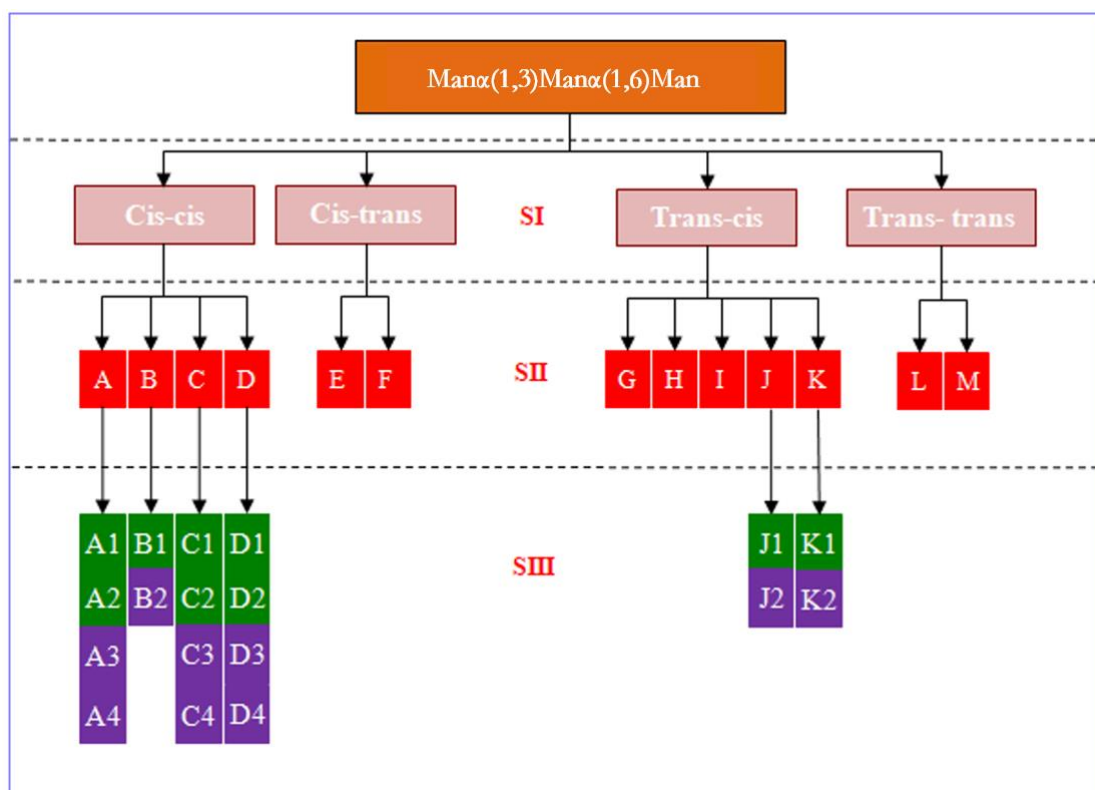

**Figure S2.** Building tree of  $\text{Man}\alpha(1,3)\text{Man}\alpha(1,6)\text{Man}$ . Regains SI, SII and SIII reflect tree-step construction. SI considers the constraint of glycosidic bond linkage. SII takes into account the inter-ring H-bonds. SIII refers to the cooperative hydrogen bonding orientation. The green and purple colors indicate the counterclockwise and clockwise orientations of the cooperative H-bonds, respectively.

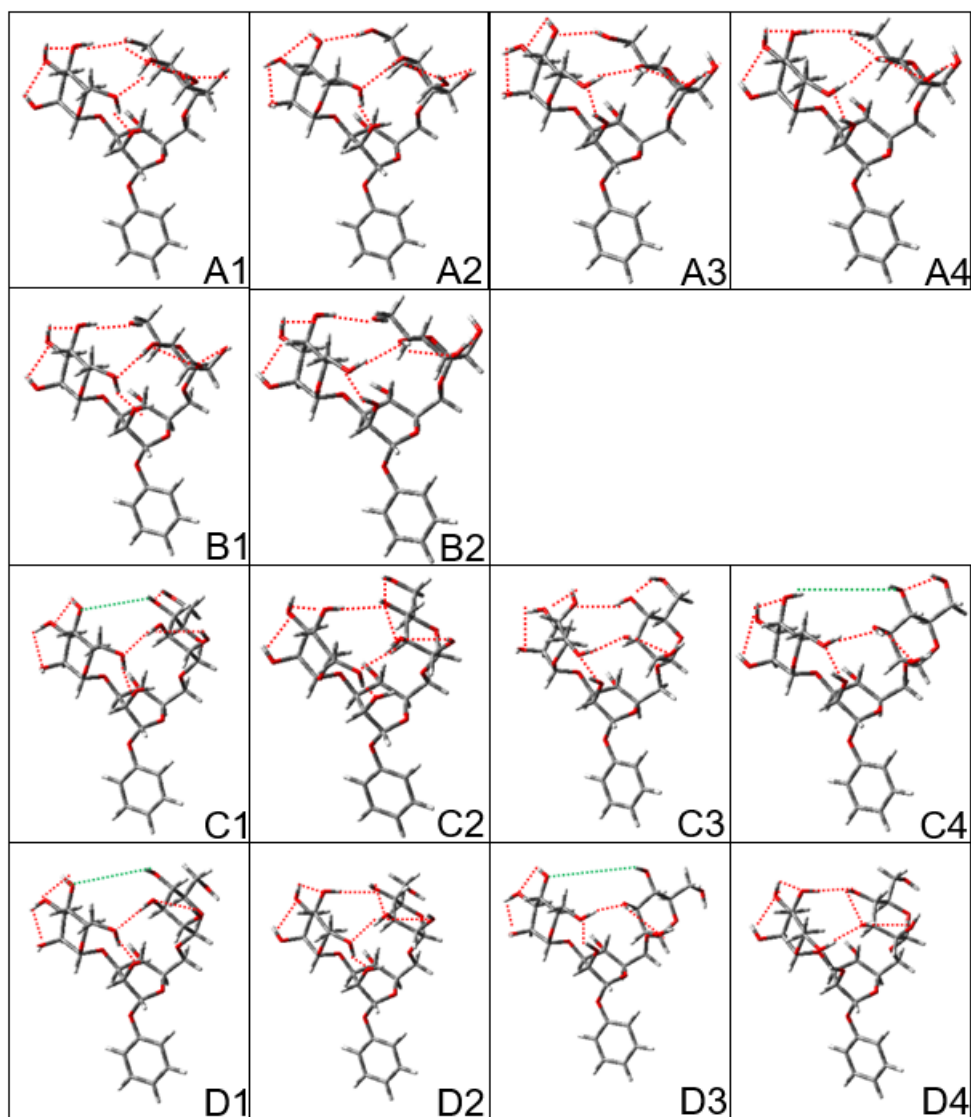

Figure S3. Representative configurations of *cis-cis* glycosidic linkage for  $\text{Man}\alpha(1,3)\text{Man}\alpha(1,6)\text{Man}$ .

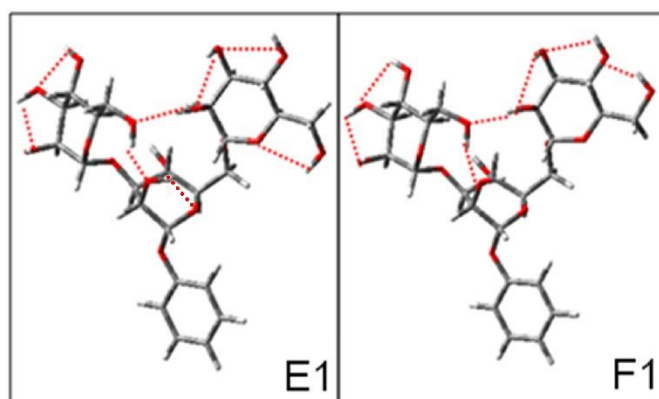

Figure S4. Representative configurations of *cis-trans* glycosidic linkage for **Man $\alpha$ (1,3)Man $\alpha$ (1,6)Man**.

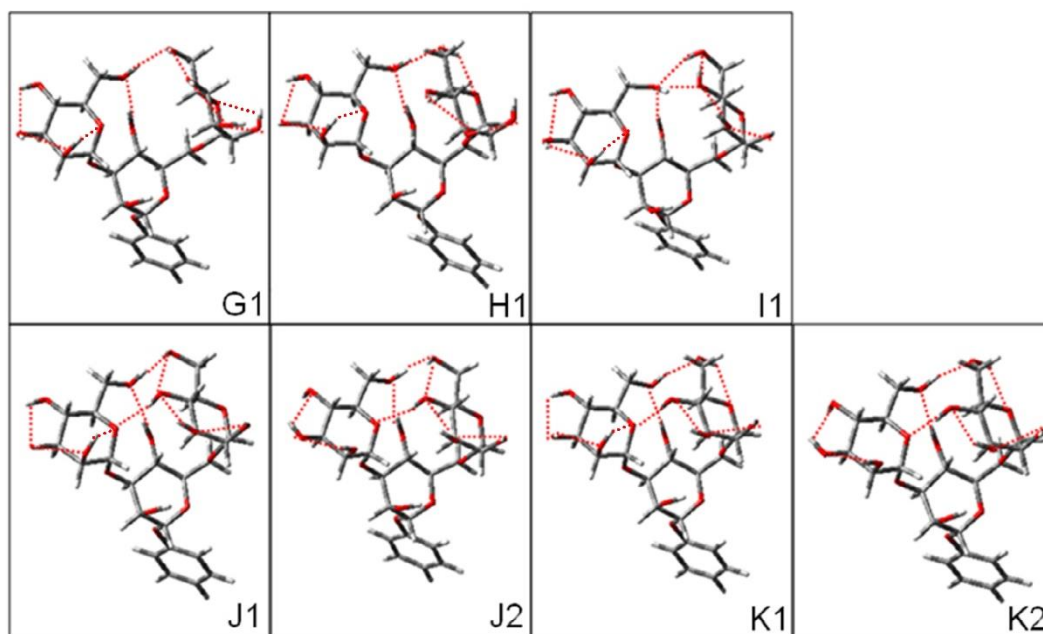

Figure S5. Representative configurations of *trans-cis* glycosidic linkage for  $\text{Man}\alpha(1,3)\text{Man}\alpha(1,6)\text{Man}$ .

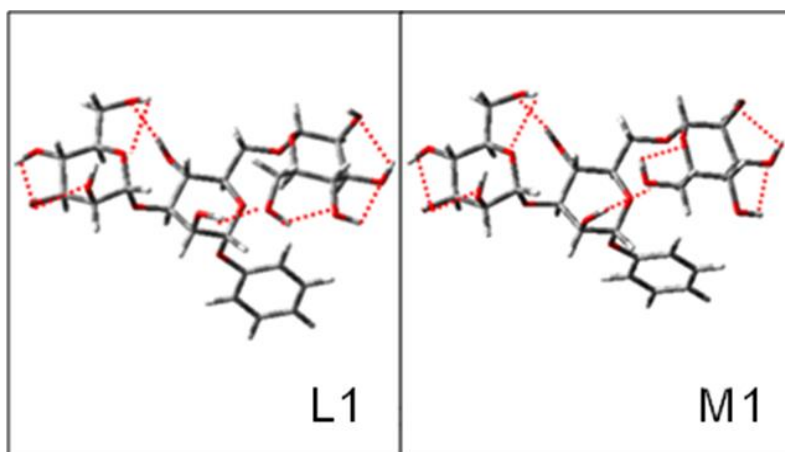

Figure S6. Representative configurations of *trans-trans* glycosidic linkage for  $\text{Man}\alpha(1,3)\text{Man}\alpha(1,6)\text{Man}$ .

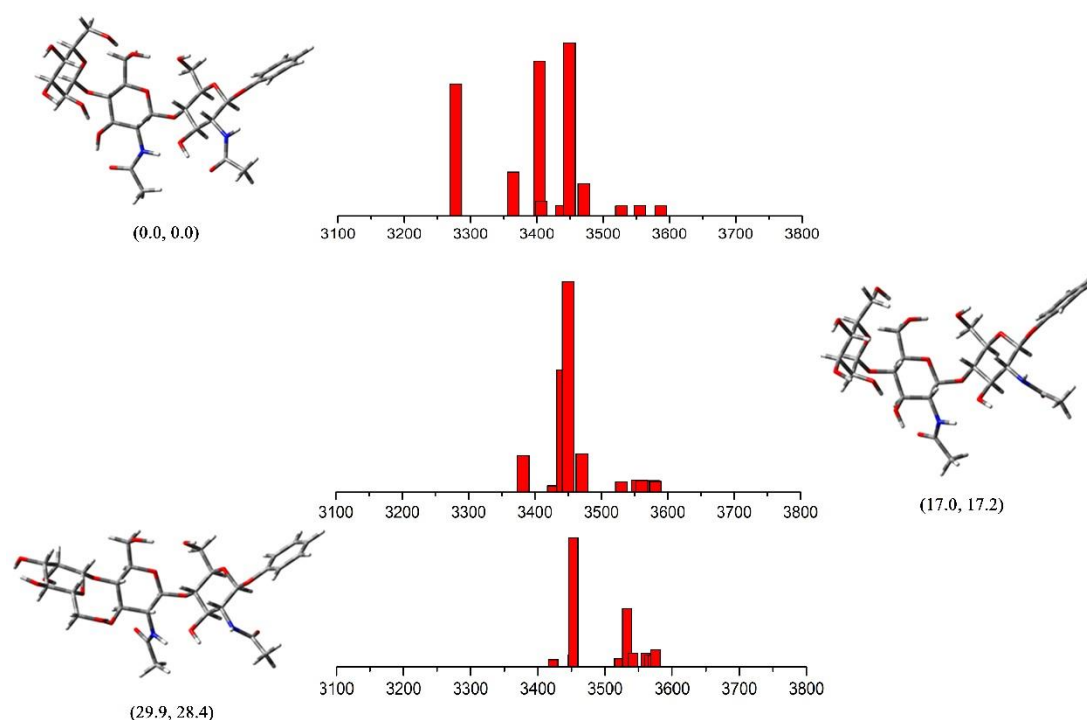

Figure S7. Computed vibrational spectra of the three lowest energy conformers. Calculated optimized structures and relative and free energies ( $\text{kJ/mol}^{-1}$  shown in brackets) are calculated using DFT (M06-2X/6-31+G\*). Free energies are determined at 298.15 K.

Clearly, the lowest energy configuration obtained by B3LYP still processes the lowest relative energy at the M06-2X level. An overlay of the conformations for  $\text{Man}\beta(1,4)\text{GlcNAc}\beta(1,4)\text{GlcNAc}$  suggests that the second and third lowest energy configurations in Figure S7 are in good accord with the two lowest-energy conformers generated using the random search procedure in Simons' work except for the orientation of NHCO. The difference between the second and third lowest energy configurations is 12.9  $\text{kJ/mol}$  in energy, which is 0.7  $\text{kJ/mol}$  higher than that in Ref. [39]. The orders of relative energy are in agreement with that of Gibbs free energy. The results suggest that the lowest energy configuration we built is more favorable at 0 K and 298.15 K. For the lowest energy configuration, the agreement is quite good in terms of the correspondence between the strong band at  $3450\text{ cm}^{-1}$  of the experimental and computed vibrational spectra. But there is a discrepancy of  $70\text{ cm}^{-1}$  for the strong band at  $3350\text{ cm}^{-1}$  in the experimental spectrum. The band located at a low wavenumber of  $3278\text{ cm}^{-1}$  in the computed spectrum of the lowest energy configuration is assigned to the OH3 vibrations on G ring of the lowest energy conformation. In the comparison with conformational structures, we find that the difference between the lowest-energy configuration calculated by Ref. [39] and that in our calculations is the rotation of acetylamino groups on G and G' rings. The intra-ring H-bond related to the acetylamino group is not formed in Ref. [39]. However, the lowest-energy conformer in our work

will result to form the intra-ring H-bond of  $\text{OH3} \rightarrow \text{NHCO} \rightarrow \text{O1}$ , which further constructs a counterclockwise cooperative H-bond of  $\text{OH4}_\text{M} \rightarrow \text{OH3}_\text{M} \rightarrow \text{OH2}_\text{M} \rightarrow \text{OH3}' \rightarrow \text{NHCO}' \rightarrow \text{OH3} \rightarrow \text{NHCO} \rightarrow \text{O1}$ .



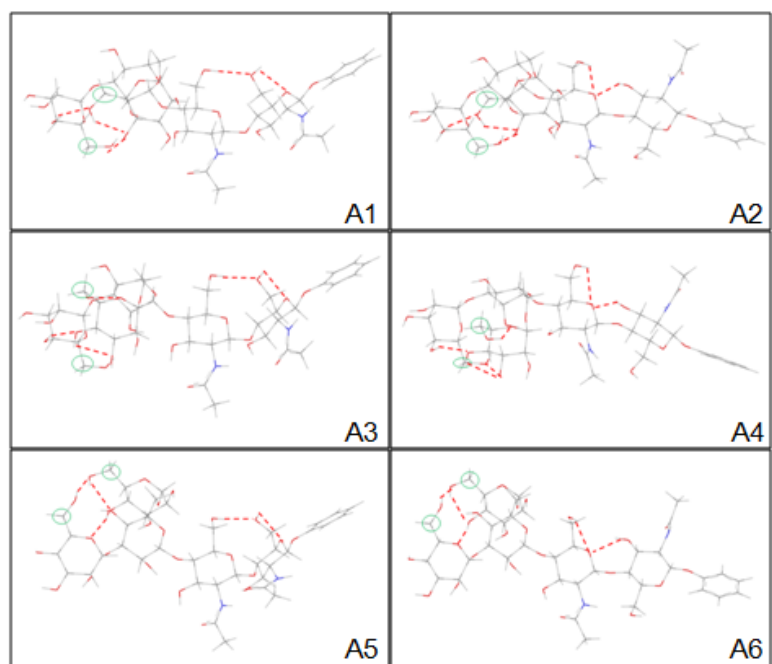

Figure S8. Representative structures of core pentasaccharide in the first construction way.

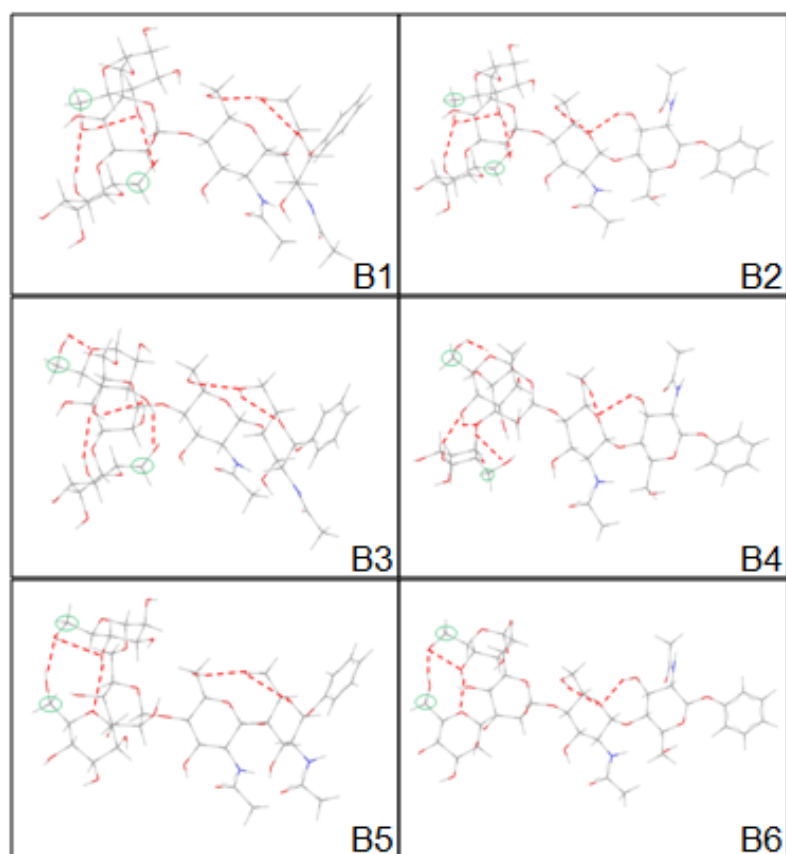

Figure S9. Representative structures of core pentasaccharide in the second construction way.

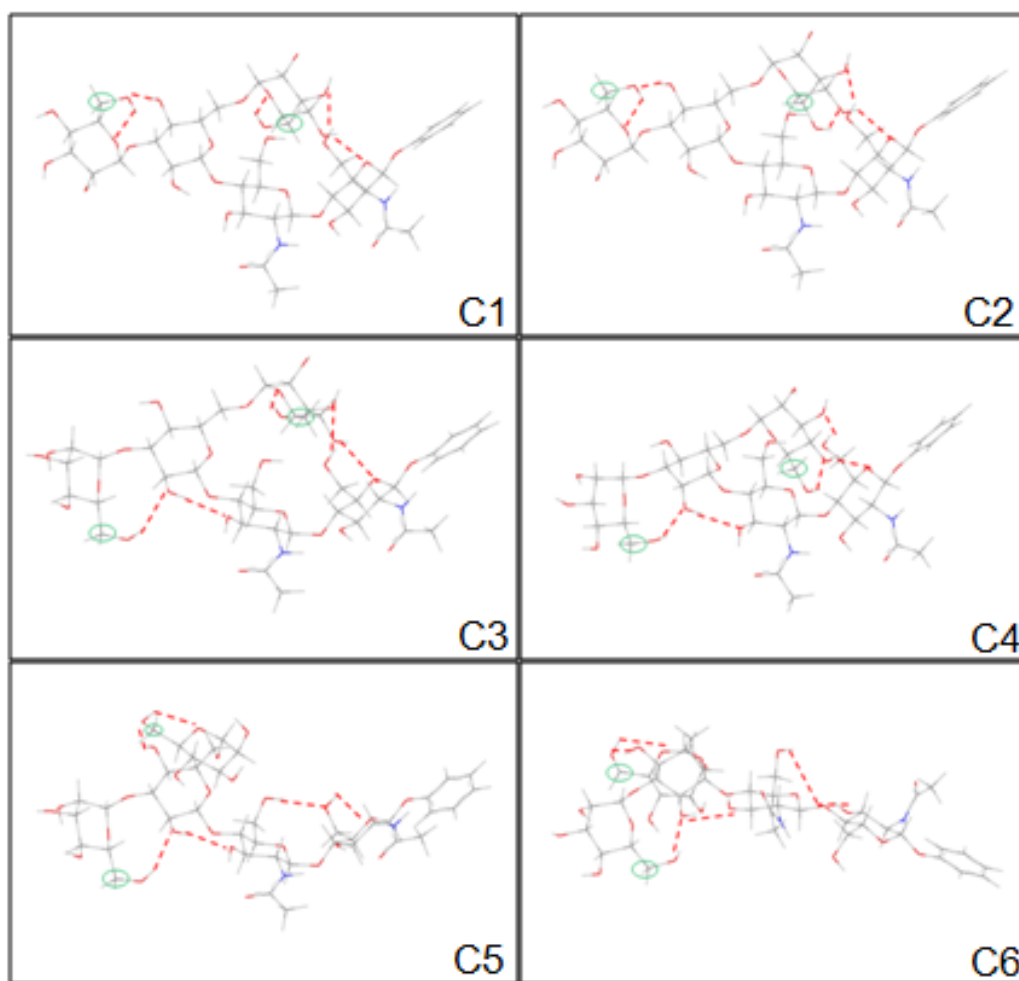

Figure S10. Representative structures of core pentasaccharide in the third construction way.

Table S1. Relative energies of trisaccharide and pentasaccharide conformers.

| Man $\beta$ (1,4)GlcNAc $\beta$ (1,4)<br>GlcNAc |                             | Man $\alpha$ (1,3)Man $\alpha$ (1,6)Man |                             | Man <sub>3</sub> GlcNAc <sub>2</sub> |                             |
|-------------------------------------------------|-----------------------------|-----------------------------------------|-----------------------------|--------------------------------------|-----------------------------|
| Conformer                                       | Relative energy<br>(kJ/mol) | Conformer                               | Relative energy<br>(kJ/mol) | Conformer                            | Relative energy<br>(kJ/mol) |
| A1                                              | 0.0                         | A1                                      | 0.0                         | A1                                   | 0.0                         |
| A2                                              | 20.7                        | A2                                      | 37.8                        | A2                                   | 8.6                         |
| A3                                              | 9.8                         | A3                                      | 18.8                        | A3                                   | 14.9                        |
| B1                                              | 36.5                        | A4                                      | 28.2                        | A4                                   | 17.6                        |
| C1                                              | 17.8                        | B1                                      | 7.6                         | A5                                   | 0.3                         |
| D1                                              | 19.9                        | B2                                      | 13.7                        | A6                                   | 6.3                         |
| E1                                              | 23.2                        | C1                                      | 11.2                        | B1                                   | 4.1                         |
| F1                                              | 13.1                        | C2                                      | 19.3                        | B2                                   | 13.2                        |
| G1                                              | 17.4                        | C3                                      | 38.3                        | B3                                   | 15.9                        |
| G2                                              | 50.6                        | C4                                      | 41.8                        | B4                                   | 31.4                        |
| H1                                              | 19.7                        | D1                                      | 8.4                         | B5                                   | 14.7                        |
| H2                                              | 48.7                        | D2                                      | 21.2                        | B6                                   | 19.2                        |
| I1                                              | 22.2                        | D3                                      | 32.5                        | B7                                   | 0.5                         |
| I2                                              | 51.9                        | D4                                      | 41.0                        | B8                                   | 5.9                         |
| J1                                              | 6.1                         | E1                                      | 44.1                        | B9                                   | 14.5                        |
| J2                                              | 26.6                        | F1                                      | 22.4                        | B10                                  | 18.5                        |
| K1                                              | 44.7                        | G1                                      | 20.1                        | B11                                  | 8.5                         |
| K2                                              | 37.3                        | H1                                      | 22.4                        | B12                                  | 14.0                        |
| K3                                              | 38.3                        | I1                                      | 17.9                        | C1                                   | 3.8                         |
| K4                                              | 40.5                        | J1                                      | 8.1                         | C2                                   | 6.4                         |
| K5                                              | 59.7                        | J2                                      | 5.1                         | C3                                   | 4.1                         |
| K6                                              | 40.5                        | K1                                      | 6.1                         | C4                                   | 6.6                         |
| K7                                              | 51.4                        | K2                                      | 5.5                         | C5                                   | 25.7                        |
| K8                                              | 55.0                        | L1                                      | 42.5                        | C6                                   | 20.1                        |
| L1                                              | 36.1                        | M1                                      | 46.2                        |                                      |                             |
| L2                                              | 30.5                        |                                         |                             |                                      |                             |
| L3                                              | 31.7                        |                                         |                             |                                      |                             |
| L4                                              | 32.2                        |                                         |                             |                                      |                             |
| L5                                              | 60.1                        |                                         |                             |                                      |                             |
| L6                                              | 50.1                        |                                         |                             |                                      |                             |
| L7                                              | 53.4                        |                                         |                             |                                      |                             |
| L8                                              | 53.0                        |                                         |                             |                                      |                             |
| M1                                              | 31.1                        |                                         |                             |                                      |                             |
| M2                                              | 30.5                        |                                         |                             |                                      |                             |

---

|    |      |
|----|------|
| M3 | 29.9 |
| M4 | 30.5 |
| M5 | 48.9 |
| M6 | 46.0 |
| M7 | 45.2 |
| M8 | 47.2 |
| N1 | 34.0 |
| N2 | 28.0 |
| N3 | 26.7 |
| N4 | 24.4 |
| N5 | 54.8 |
| N6 | 44.9 |
| N7 | 42.6 |
| N8 | 44.5 |
| O1 | 37.1 |
| O2 | 36.5 |
| O3 | 36.4 |
| O4 | 34.4 |
| P1 | 24.8 |
| P2 | 43.9 |
| Q1 | 24.7 |
| Q2 | 44.2 |
| R1 | 13.2 |
| R2 | 29.9 |
| S1 | 40.1 |
| S2 | 57.6 |
| T1 | 24.5 |

---

Table S2. Cartesian coordinates of optimized configurations for Man $\beta$ (1,4)GlcNAc $\beta$ (1,4)GlcNAc

A1

|   |             |             |             |
|---|-------------|-------------|-------------|
| C | 2.52283000  | 1.87339800  | -0.91076200 |
| C | 0.99962800  | 1.97083100  | -0.71431100 |
| C | 0.29835200  | 1.21651700  | -1.86591700 |
| C | 2.15355500  | -0.31750700 | -2.09235600 |
| C | 2.96412500  | 0.40568300  | -0.99965900 |
| H | 0.75514500  | 1.47024000  | 0.22900800  |
| H | 2.80722900  | 2.36317700  | -1.84872200 |
| H | 2.45565100  | 0.09328300  | -3.06801800 |
| H | 0.51136000  | 1.73073600  | -2.81270600 |
| O | 0.74316500  | -0.11658100 | -1.90948000 |
| O | 3.20886400  | 2.50522600  | 0.15947600  |
| C | 2.34013900  | -1.83183900 | -2.12635100 |
| H | 3.39590900  | -2.06054400 | -2.24856600 |
| H | 1.79424800  | -2.22856900 | -2.99191800 |
| H | 3.18213800  | 3.46282400  | -0.03631600 |
| O | 1.90958500  | -2.46834400 | -0.93465400 |
| H | 0.93773600  | -2.45974300 | -0.88866700 |
| C | -2.74076700 | 1.47953800  | -0.07554500 |
| C | -3.72414600 | 0.75037500  | 0.86842000  |
| C | -1.78412700 | 0.48671300  | -0.76632400 |
| H | -3.31814700 | 1.98910600  | -0.86151600 |
| C | -4.37620700 | -0.42084000 | 0.11528400  |
| H | -3.15323800 | 0.33338800  | 1.70586100  |
| C | -2.56284400 | -0.68492900 | -1.39344300 |
| H | -1.07498600 | 0.09519600  | -0.03392600 |
| H | -5.00064400 | -0.03704900 | -0.70741500 |
| H | -3.18685100 | -0.29017000 | -2.21018700 |
| O | -3.40044400 | -1.29113300 | -0.39534000 |
| O | -5.17221300 | -1.11506200 | 1.03404600  |
| O | -1.11165300 | 1.20668100  | -1.80804200 |
| C | -1.72212300 | -1.82410400 | -1.95214100 |
| H | -2.39096600 | -2.54315800 | -2.43919100 |
| H | -1.01836200 | -1.44056200 | -2.68505100 |
| O | -0.94892700 | -2.47689100 | -0.95056200 |
| H | -1.53744400 | -2.87020600 | -0.29439900 |
| O | -1.93040000 | 2.40906900  | 0.61513500  |
| H | -2.53513400 | 3.04814800  | 1.05717800  |
| O | 4.34429400  | 0.38925900  | -1.39687900 |
| C | -6.15922500 | -1.97902100 | 0.58230300  |
| C | -6.27758100 | -2.41423300 | -0.73635400 |
| C | -7.06176800 | -2.41050400 | 1.55524400  |
| C | -7.32654900 | -3.27107300 | -1.07652300 |

|   |             |             |             |
|---|-------------|-------------|-------------|
| H | -5.55425600 | -2.12346300 | -1.48643900 |
| C | -8.09584600 | -3.27064100 | 1.20303200  |
| H | -6.93758600 | -2.07046000 | 2.57763400  |
| C | -8.23745100 | -3.70154000 | -0.11683500 |
| H | -7.41736300 | -3.61055800 | -2.10315600 |
| H | -8.79393500 | -3.60417900 | 1.96371500  |
| H | -9.04474200 | -4.37188400 | -0.39045400 |
| H | 2.82840500  | -0.10296800 | -0.04487500 |
| N | -4.84190900 | 1.55816900  | 1.39030500  |
| H | -5.61993700 | 0.98260300  | 1.68072400  |
| C | -6.20370800 | 3.29440900  | 2.40986000  |
| H | -6.00133800 | 3.59577600  | 3.44021400  |
| H | -6.57731800 | 4.17408500  | 1.88346900  |
| H | -6.97781200 | 2.52535600  | 2.41181600  |
| N | 0.45573800  | 3.32831400  | -0.63553400 |
| H | -0.51640200 | 3.31245700  | -0.34104600 |
| C | 0.12206800  | 5.72794700  | -0.62611100 |
| H | 0.47281400  | 6.36370900  | 0.18946700  |
| H | 0.18516200  | 6.31663700  | -1.54388600 |
| H | -0.92048000 | 5.46010400  | -0.44797200 |
| C | 1.05395900  | 4.53690900  | -0.75257100 |
| O | 2.25959400  | 4.72028500  | -0.94894100 |
| C | -4.90060600 | 2.86216100  | 1.76871600  |
| O | -3.99212500 | 3.67914400  | 1.61567000  |
| C | 5.29066000  | -0.29765500 | -0.61139300 |
| C | 5.68388600  | 0.41034900  | 0.70434500  |
| H | 6.18898100  | -0.31929300 | -1.24760500 |
| C | 5.67297900  | -2.49653700 | 0.32607100  |
| C | 6.63285800  | -0.49375900 | 1.49559600  |
| H | 6.20315500  | 1.33873500  | 0.43125400  |
| C | 6.02936300  | -1.88813100 | 1.68149800  |
| H | 6.60507600  | -2.66169600 | -0.23867300 |
| H | 7.58520700  | -0.59672500 | 0.96495800  |
| H | 5.11745800  | -1.81617500 | 2.28457900  |
| O | 4.81738800  | -1.60943700 | -0.40700100 |
| O | 6.97513400  | -2.75043100 | 2.30722900  |
| O | 6.95144400  | 0.08385200  | 2.75807400  |
| O | 4.60319400  | 0.69716600  | 1.57569200  |
| C | 4.91923300  | -3.82388500 | 0.42412100  |
| H | 4.83895600  | -4.25365800 | -0.58446500 |
| H | 5.50411700  | -4.50934300 | 1.03951100  |
| O | 3.64770700  | -3.69567200 | 1.02226400  |
| H | 3.05902500  | -3.22298500 | 0.40732900  |
| H | 7.30361500  | -2.28960700 | 3.09086300  |
| H | 6.13075300  | 0.48382700  | 3.08554800  |

|    |             |             |             |   |             |             |             |
|----|-------------|-------------|-------------|---|-------------|-------------|-------------|
| H  | 4.11703200  | 1.46938100  | 1.22776900  | C | -7.90586000 | -3.44179400 | 0.86984400  |
| A2 |             |             |             | H | -6.67560500 | -2.50888200 | 2.38249700  |
| C  | 2.53030200  | 2.11916700  | -0.63591500 | C | -8.11601000 | -3.62225800 | -0.49809700 |
| C  | 0.98881000  | 2.21458100  | -0.57984900 | H | -7.39829700 | -3.15849900 | -2.47210700 |
| C  | 0.32670300  | 1.55380200  | -1.79944600 | H | -8.56564400 | -3.91441600 | 1.59006300  |
| C  | 2.24714600  | 0.10917800  | -2.12936600 | H | -8.93867700 | -4.23510800 | -0.84981300 |
| C  | 2.95901700  | 0.66621400  | -0.88222200 | H | 2.71826300  | 0.03245500  | -0.02867400 |
| H  | 0.66203600  | 1.67969100  | 0.31376700  | N | -4.58221400 | 1.29248600  | 1.75296700  |
| H  | 2.89380300  | 2.72831400  | -1.46610200 | H | -5.38246900 | 0.70326600  | 1.93454000  |
| H  | 2.58754700  | 0.67795500  | -3.00804300 | C | -5.84227700 | 2.82687800  | 3.15617700  |
| H  | 0.49543400  | 2.15914300  | -2.69354100 | H | -5.61611900 | 2.89216900  | 4.22290500  |
| O  | 0.82756100  | 0.24109900  | -1.98539200 | H | -6.17714900 | 3.81477400  | 2.83580600  |
| O  | 3.09039700  | 2.66877400  | 0.54431800  | H | -6.65372700 | 2.11205900  | 3.00939700  |
| C  | 2.47414800  | -1.37555300 | -2.40304600 | N | 0.51615900  | 3.58010200  | -0.40940200 |
| H  | 3.53908100  | -1.56985300 | -2.49953500 | H | -0.16997600 | 3.69684900  | 0.31947200  |
| H  | 1.98551100  | -1.62788300 | -3.35234900 | C | 0.13645900  | 5.93718900  | -0.88298100 |
| H  | 3.33308100  | 1.94903400  | 1.15023900  | H | 0.94332200  | 6.64166600  | -0.66727000 |
| O  | 1.98735900  | -2.21646500 | -1.36412900 | H | -0.42279200 | 6.33181100  | -1.73328000 |
| H  | 1.01359000  | -2.20460600 | -1.35845900 | H | -0.52086500 | 5.88494700  | -0.01246900 |
| C  | -2.52687300 | 1.44597800  | 0.23199700  | C | 0.75182800  | 4.60351600  | -1.27215600 |
| C  | -3.50407800 | 0.56794500  | 1.05375900  | O | 1.42573900  | 4.48657000  | -2.29076600 |
| C  | -1.66046700 | 0.59756100  | -0.72216000 | C | -4.56728100 | 2.48153600  | 2.41204000  |
| H  | -3.11124800 | 2.14580400  | -0.38357000 | O | -3.61779200 | 3.26370400  | 2.42681600  |
| C  | -4.21474900 | -0.43973100 | 0.13670000  | C | 5.22004900  | -0.14431800 | -0.35236900 |
| H  | -2.91606200 | -0.00445200 | 1.78043700  | C | 5.40123700  | 0.26697500  | 1.12546000  |
| C  | -2.49127000 | -0.44937700 | -1.48305700 | H | 6.20927000  | -0.03399200 | -0.82160700 |
| H  | -0.89141900 | 0.08366000  | -0.14215800 | C | 5.56478900  | -2.48971700 | 0.15232800  |
| H  | -4.86680900 | 0.09114100  | -0.57570200 | C | 6.23961800  | -0.78948400 | 1.84916900  |
| H  | -3.15351200 | 0.07667300  | -2.18712900 | H | 5.92956500  | 1.22796200  | 1.13706900  |
| O  | -3.28283600 | -1.22045000 | -0.56376600 | C | 5.64534100  | -2.17887500 | 1.65110300  |
| O  | -4.98796300 | -1.27475500 | 0.95547600  | H | 6.58384000  | -2.50569300 | -0.26859800 |
| O  | -1.08019100 | 1.46137000  | -1.70374800 | H | 7.26419600  | -0.78260100 | 1.45146900  |
| C  | -1.67808000 | -1.46887700 | -2.26895200 | H | 4.63564500  | -2.21262500 | 2.06858700  |
| H  | -2.36443600 | -2.09237800 | -2.85355500 | O | 4.78213800  | -1.48395500 | -0.49004900 |
| H  | -0.99753000 | -0.95655600 | -2.94297500 | O | 6.50407800  | -3.08146700 | 2.35912400  |
| O  | -0.87291200 | -2.29172500 | -1.42738600 | O | 6.25911100  | -0.42270700 | 3.22676000  |
| H  | -1.44203700 | -2.75410200 | -0.79948200 | O | 4.14994000  | 0.41109800  | 1.79957300  |
| O  | -1.63906000 | 2.15263400  | 1.07590400  | C | 4.87658700  | -3.81615000 | -0.16984500 |
| H  | -2.19093200 | 2.70711200  | 1.66922000  | H | 4.90075700  | -3.96015000 | -1.25808200 |
| O  | 4.38640200  | 0.66773100  | -1.11706000 | H | 5.44249400  | -4.63889200 | 0.27713200  |
| C  | -5.99809800 | -2.04567500 | 0.40215400  | O | 3.56057000  | -3.88378300 | 0.32982600  |
| C  | -6.18621400 | -2.22985200 | -0.96682400 | H | 2.99260400  | -3.29154200 | -0.20209200 |
| C  | -6.85236800 | -2.65547200 | 1.32247100  | H | 6.01485100  | -3.88356200 | 2.57435600  |
| C  | -7.25380000 | -3.01543500 | -1.40616300 | H | 6.60398200  | -1.17740800 | 3.72317800  |
| H  | -5.50233400 | -1.79972000 | -1.68615100 | H | 4.34318300  | 0.37922500  | 2.74914200  |

|    |             |             |             |   |             |             |             |
|----|-------------|-------------|-------------|---|-------------|-------------|-------------|
| A3 |             |             |             | H | -7.35507600 | -1.89463300 | 2.37522500  |
| C  | 2.42719900  | 1.93868700  | -0.78382500 | C | -7.94336900 | -4.20161600 | -0.06249500 |
| C  | 0.90001800  | 1.93704400  | -0.58963500 | H | -6.70866600 | -4.46911700 | -1.80345400 |
| C  | 0.23942100  | 1.16568600  | -1.75912000 | H | -8.94852700 | -3.70603800 | 1.77946100  |
| C  | 2.19280700  | -0.20686500 | -2.08435900 | H | -8.63445900 | -4.99453200 | -0.32705700 |
| C  | 2.96342800  | 0.51335700  | -0.96597800 | H | 2.87223500  | -0.05098000 | -0.03785600 |
| H  | 0.69173300  | 1.40367500  | 0.34463500  | N | -5.23691600 | 1.57369800  | 0.92342800  |
| H  | 2.68388700  | 2.50835600  | -1.68473200 | H | -6.02527100 | 0.98158100  | 1.14470600  |
| H  | 2.44035900  | 0.28046200  | -3.04120100 | C | -6.83558000 | 3.32182700  | 1.46854200  |
| H  | 0.41714500  | 1.72158400  | -2.69028800 | H | -6.83605900 | 3.75762800  | 2.47030400  |
| O  | 0.78643600  | -0.12857300 | -1.85361700 | H | -7.14745100 | 4.10453800  | 0.77512800  |
| O  | 3.07958000  | 2.52800400  | 0.33222200  | H | -7.56208100 | 2.50819200  | 1.43663400  |
| C  | 2.50090000  | -1.69562100 | -2.21654100 | N | 0.27713000  | 3.26211800  | -0.50242400 |
| H  | 3.56430800  | -1.82912400 | -2.41240200 | H | -0.72328800 | 3.19085600  | -0.31649100 |
| H  | 1.93693300  | -2.07872300 | -3.07309600 | C | -0.19395600 | 5.63276900  | -0.37472400 |
| H  | 2.95025400  | 3.49696000  | 0.23220100  | H | 0.01842700  | 6.22328100  | 0.51897500  |
| O  | 2.09524900  | -2.42166000 | -1.06347700 | H | -0.05418400 | 6.28975900  | -1.23597500 |
| H  | 2.85451000  | -2.78733600 | -0.57661000 | H | -1.23206100 | 5.29989900  | -0.34666400 |
| C  | -2.94397900 | 1.43104800  | -0.19463200 | C | 0.81357400  | 4.50233800  | -0.46321400 |
| C  | -3.99854900 | 0.79450700  | 0.73421200  | O | 2.02224400  | 4.76686800  | -0.49991000 |
| C  | -1.83568100 | 0.43564700  | -0.59414700 | C | -5.42026100 | 2.90267900  | 1.12478500  |
| H  | -3.44324200 | 1.75703300  | -1.11876300 | O | -4.53429300 | 3.75506800  | 1.03571900  |
| C  | -4.43045000 | -0.55277400 | 0.13765200  | C | 5.34472800  | -0.01811200 | -0.63232500 |
| H  | -3.53534000 | 0.59469000  | 1.70660300  | C | 5.65141700  | 0.60498000  | 0.75243000  |
| C  | -2.40134500 | -0.93595400 | -1.01275800 | H | 6.24852100  | 0.10611400  | -1.24745200 |
| H  | -1.16289400 | 0.28171300  | 0.25059100  | C | 5.98051200  | -2.22249700 | 0.10918500  |
| H  | -4.92548600 | -0.39263800 | -0.83598300 | C | 6.66751700  | -0.26974400 | 1.49603500  |
| H  | -2.93599200 | -0.82027900 | -1.96927500 | H | 6.08571500  | 1.59576100  | 0.56592200  |
| O  | -3.32783800 | -1.39260000 | -0.01214900 | C | 6.18061900  | -1.72057500 | 1.53922600  |
| O  | -5.34375100 | -1.13010800 | 1.03606800  | H | 6.95089300  | -2.17138700 | -0.41158700 |
| O  | -1.15802300 | 1.05666600  | -1.70591000 | H | 7.63821200  | -0.24488200 | 0.98955600  |
| C  | -1.36777100 | -2.04615400 | -1.17325700 | H | 5.22060300  | -1.74681700 | 2.07212100  |
| H  | -1.92632000 | -2.98034700 | -1.31983500 | O | 5.02281000  | -1.40091300 | -0.55461700 |
| H  | -0.78647300 | -1.84780000 | -2.07438900 | O | 7.12981400  | -2.55953000 | 2.18282600  |
| O  | -0.53820600 | -2.14802700 | -0.03682900 | O | 6.89762400  | 0.21346600  | 2.81232500  |
| H  | 0.38801500  | -2.22052300 | -0.32935000 | O | 4.54089600  | 0.71717500  | 1.62353800  |
| O  | -2.29462500 | 2.53142100  | 0.41999600  | C | 5.48310200  | -3.66007000 | -0.00019000 |
| H  | -2.99271900 | 3.16835600  | 0.69655500  | H | 5.48818300  | -3.96278900 | -1.04850500 |
| O  | 4.34328000  | 0.61904600  | -1.37062600 | H | 6.15574500  | -4.31897600 | 0.55461000  |
| C  | -6.16120800 | -2.16454700 | 0.61494900  | O | 4.13006200  | -3.82279200 | 0.43070600  |
| C  | -5.96350500 | -2.89083900 | -0.55857300 | H | 4.08080600  | -3.81471100 | 1.39351700  |
| C  | -7.23359500 | -2.46136700 | 1.45833800  | H | 7.43278300  | -2.09355800 | 2.97495200  |
| C  | -6.86594700 | -3.90278400 | -0.89117200 | H | 6.04483700  | 0.54868300  | 3.13235800  |
| H  | -5.10301400 | -2.70392600 | -1.18641400 | H | 3.99327800  | 1.47703300  | 1.33496800  |
| C  | -8.11844000 | -3.47868800 | 1.11846100  |   |             |             |             |



|    |             |             |             |   |             |             |             |
|----|-------------|-------------|-------------|---|-------------|-------------|-------------|
| B1 |             |             |             | H | -7.28544000 | -1.85378600 | 2.75359000  |
| C  | 2.29632700  | 1.79714600  | -0.90328100 | C | -8.33905200 | -3.97796900 | 0.30620100  |
| C  | 0.76910400  | 1.84087000  | -0.72150600 | H | -7.36215300 | -4.21920700 | -1.59527000 |
| C  | 0.11407000  | 0.95092700  | -1.80060700 | H | -9.06229700 | -3.52844400 | 2.28688400  |
| C  | 2.05182400  | -0.49581700 | -1.93915500 | H | -9.11126500 | -4.71009900 | 0.09698800  |
| C  | 2.82261200  | 0.35378300  | -0.90897100 | H | 2.72725100  | -0.09302800 | 0.08329000  |
| H  | 0.53672000  | 1.42598400  | 0.26581800  | N | -5.18483100 | 1.58578200  | 1.11043800  |
| H  | 2.56413700  | 2.24584100  | -1.86619000 | H | -6.03169400 | 1.05549900  | 1.26090800  |
| H  | 2.28771500  | -0.12763900 | -2.94647700 | C | -6.54540100 | 3.37724300  | 2.04309400  |
| H  | 0.33938900  | 1.36732100  | -2.79046500 | H | -6.50049900 | 3.55133100  | 3.12095400  |
| O  | 0.63367800  | -0.36820100 | -1.70249900 | H | -6.73463900 | 4.34051000  | 1.56737500  |
| O  | 2.94563200  | 2.51813100  | 0.13314900  | H | -7.37690200 | 2.70377900  | 1.82925600  |
| C  | 2.32262800  | -2.00912300 | -1.88997200 | N | 0.17084800  | 3.17652300  | -0.79235900 |
| H  | 1.55444800  | -2.50282900 | -2.48829900 | H | -0.81634000 | 3.14438400  | -0.54693800 |
| H  | 2.21597800  | -2.36143900 | -0.85536600 | C | -0.25535000 | 5.55346900  | -0.97345100 |
| H  | 2.85299700  | 3.46464100  | -0.10872100 | H | 0.02475600  | 6.27731100  | -0.20574100 |
| O  | 3.56408900  | -2.38336000 | -2.43970100 | H | -0.16719200 | 6.05650600  | -1.93909900 |
| H  | 4.25231800  | -2.15592700 | -1.79604400 | H | -1.29352400 | 5.25405600  | -0.82412100 |
| C  | -2.99355000 | 1.33325100  | -0.16972700 | C | 0.72956400  | 4.40072300  | -0.94030900 |
| C  | -4.02008400 | 0.73027200  | 0.81727300  | O | 1.93955200  | 4.62778000  | -1.05365600 |
| C  | -1.99639800 | 0.27535700  | -0.68825400 | C | -5.19953900 | 2.86028700  | 1.58122900  |
| H  | -3.53744200 | 1.72858100  | -1.04024700 | O | -4.20545000 | 3.58573600  | 1.63578600  |
| C  | -4.58955500 | -0.56858400 | 0.22604300  | C | 5.22885800  | -0.06032900 | -0.49134100 |
| H  | -3.50258400 | 0.47524100  | 1.74901900  | C | 5.52420500  | 0.78518700  | 0.76500000  |
| C  | -2.73351400 | -0.98895900 | -1.17337600 | H | 6.11906500  | -0.01119400 | -1.13424200 |
| H  | -1.31208100 | 0.00222100  | 0.11957500  | C | 6.06277200  | -2.08114600 | 0.51383200  |
| H  | -5.18063500 | -0.34464600 | -0.67792800 | C | 6.65062900  | 0.12282200  | 1.56851100  |
| H  | -3.36329700 | -0.72615000 | -2.03544400 | H | 5.85321100  | 1.77253100  | 0.41815800  |
| O  | -3.55715200 | -1.45832800 | -0.09291300 | C | 6.31314600  | -1.34440900 | 1.83117200  |
| O  | -5.41714100 | -1.13795900 | 1.20170400  | H | 6.96545600  | -2.03641000 | -0.11248100 |
| O  | -1.28562100 | 0.88406400  | -1.78188200 | H | 7.59307500  | 0.17256600  | 1.01386800  |
| C  | -1.86859700 | -2.19244400 | -1.56962700 | H | 5.39739300  | -1.39605400 | 2.43427900  |
| H  | -1.10306900 | -2.37056500 | -0.80484200 | O | 4.97561100  | -1.43140500 | -0.16924000 |
| H  | -2.52564000 | -3.06384900 | -1.59055800 | O | 7.38187400  | -1.99466600 | 2.51725100  |
| O  | -1.30308700 | -2.07266300 | -2.85593600 | O | 6.87747300  | 0.80339500  | 2.79529000  |
| H  | -0.55110500 | -1.46715900 | -2.78211800 | O | 4.43360900  | 0.92207300  | 1.65952400  |
| O  | -2.21787700 | 2.35608600  | 0.42839200  | C | 5.68480600  | -3.55209500 | 0.70871500  |
| H  | -2.82048100 | 2.95519900  | 0.92749300  | H | 4.87260300  | -3.62699000 | 1.44591000  |
| O  | 4.20100500  | 0.40012300  | -1.31781900 | H | 5.31834600  | -3.95932600 | -0.23550500 |
| C  | -6.35088100 | -2.09759100 | 0.83983000  | O | 6.80047200  | -4.33819100 | 1.08273100  |
| C  | -6.35557400 | -2.76462200 | -0.38397500 | H | 7.22154400  | -3.92326000 | 1.84992100  |
| C  | -7.32188000 | -2.37500600 | 1.80310100  | H | 7.65225800  | -1.42451400 | 3.25034000  |
| C  | -7.36059800 | -3.69887900 | -0.64310200 | H | 6.00683400  | 1.08868900  | 3.11500300  |
| H  | -5.57672200 | -2.59221700 | -1.11466400 | H | 3.84457600  | 1.61848100  | 1.30615500  |
| C  | -8.31066100 | -3.31486200 | 1.53398100  |   |             |             |             |

|    |             |             |             |   |              |             |             |
|----|-------------|-------------|-------------|---|--------------|-------------|-------------|
| C1 |             |             |             | H | -8.34132200  | -1.42656200 | -1.67750200 |
| C  | 2.46539700  | 1.82820500  | -0.59004800 | C | -9.89869600  | 0.03853900  | 0.97675200  |
| C  | 1.08445600  | 2.02459500  | 0.09271000  | H | -8.88169600  | 1.12192300  | 2.53231400  |
| C  | 0.13708500  | 0.88360400  | -0.30827100 | H | -10.61086900 | -1.08346000 | -0.72074200 |
| C  | 1.85969400  | -0.60974300 | -0.89279900 | H | -10.88543500 | 0.18753600  | 1.40177300  |
| C  | 2.97728000  | 0.37137900  | -0.51422700 | H | 3.32163900   | 0.15516800  | 0.49833100  |
| H  | 1.22543400  | 1.97893000  | 1.17870200  | N | -4.15774500  | -2.69002700 | -0.69626100 |
| H  | 2.36394200  | 2.08171900  | -1.65489600 | H | -4.22152700  | -3.17847900 | -1.57363000 |
| H  | 1.56957700  | -0.44110200 | -1.94060000 | C | -4.38994300  | -4.91309800 | 0.28698900  |
| H  | -0.09861600 | 0.95022300  | -1.38234400 | H | -3.55496700  | -5.45040400 | 0.74110400  |
| O  | 0.73909100  | -0.35903100 | -0.04357400 | H | -5.29237600  | -5.19313000 | 0.83440700  |
| O  | 3.46499400  | 2.64473700  | -0.00006400 | H | -4.49499300  | -5.23335400 | -0.75164600 |
| C  | 2.18941800  | -2.07865500 | -0.72812900 | N | 0.39568300   | 3.27863200  | -0.26786300 |
| H  | 2.39854000  | -2.29823300 | 0.32419500  | H | -0.60233700  | 3.19072300  | -0.42823300 |
| H  | 3.06616200  | -2.33417200 | -1.32388900 | C | -0.14857800  | 5.65305100  | -0.31129300 |
| H  | 3.09741000  | 3.54819300  | 0.15054600  | H | -0.15017700  | 6.31350900  | 0.55801000  |
| O  | 1.03125800  | -2.79787000 | -1.17733500 | H | 0.19284100   | 6.24616000  | -1.16325300 |
| H  | 1.15942300  | -3.74144900 | -1.03299500 | H | -1.16192300  | 5.29896900  | -0.49974100 |
| C  | -2.43288800 | -0.93668500 | -0.32974900 | C | 0.84852200   | 4.54195800  | -0.06503400 |
| C  | -3.88465700 | -1.25911600 | -0.75747700 | O | 2.00427800   | 4.80732500  | 0.27798500  |
| C  | -2.25182700 | 0.58110900  | -0.19127600 | C | -4.16075900  | -3.42251400 | 0.45457500  |
| H  | -2.21823400 | -1.40796100 | 0.63310300  | O | -4.00242500  | -2.91676200 | 1.55891900  |
| C  | -4.95792700 | -0.44295500 | -0.01596500 | C | 5.32125300   | -0.18411300 | -1.04450400 |
| H  | -3.96856900 | -0.97551500 | -1.80964400 | C | 6.14599000   | 0.86831100  | -0.27004700 |
| C  | -3.37458900 | 1.19575800  | 0.64797000  | H | 5.84942000   | -0.38139000 | -1.98914200 |
| H  | -2.28631300 | 1.02365200  | -1.19323700 | C | 6.45376500   | -2.02240100 | -0.03521000 |
| H  | -5.07854900 | -0.78931900 | 1.01510300  | C | 7.50048700   | 0.25774600  | 0.10943900  |
| H  | -3.38582900 | 0.73652400  | 1.64816800  | H | 6.30080200   | 1.72273000  | -0.94165700 |
| O  | -4.61367000 | 0.94161300  | -0.01515400 | C | 7.28664700   | -1.07335100 | 0.82979100  |
| O  | -6.14790500 | -0.58984400 | -0.73246000 | H | 6.98740000   | -2.22303000 | -0.97655300 |
| O  | -1.02926000 | 0.97617300  | 0.44404000  | H | 8.10328800   | 0.08029000  | -0.78688800 |
| C  | -3.23082100 | 2.70194700  | 0.82928900  | H | 6.73886000   | -0.88604400 | 1.76186900  |
| H  | -4.16101900 | 3.10047600  | 1.24741200  | O | 5.19505200   | -1.40033400 | -0.32094900 |
| H  | -2.42200400 | 2.90486500  | 1.52942400  | O | 8.53679200   | -1.70004200 | 1.11989300  |
| O  | -2.88450700 | 3.39231900  | -0.37454800 | O | 8.25730400   | 1.14261100  | 0.92557700  |
| H  | -3.62032500 | 3.33220200  | -0.99661100 | O | 5.56330500   | 1.29804000  | 0.94651800  |
| O  | -1.61346700 | -1.47380600 | -1.35753000 | C | 6.16666200   | -3.36129300 | 0.64727200  |
| H  | -0.76789100 | -1.80440800 | -1.01236100 | H | 5.75454500   | -3.17993400 | 1.65039500  |
| O  | 4.04979600  | 0.23679300  | -1.45998100 | H | 5.41433800   | -3.90052500 | 0.06820500  |
| C  | -7.35598600 | -0.34714600 | -0.11159700 | O | 7.31144700   | -4.19267800 | 0.69883300  |
| C  | -7.49934100 | 0.37878200  | 1.07094800  | H | 8.04153500   | -3.67931200 | 1.07578900  |
| C  | -8.47875400 | -0.86915900 | -0.75750900 | H | 9.11494500   | -1.03361600 | 1.51613600  |
| C  | -8.77412300 | 0.55891500  | 1.61061400  | H | 7.62117900   | 1.59105100  | 1.50510600  |
| H  | -6.63860700 | 0.81949300  | 1.55645000  | H | 4.83312200   | 1.91871000  | 0.74158500  |
| C  | -9.74327800 | -0.67297600 | -0.21405500 |   |              |             |             |

|    |             |             |             |   |              |             |             |
|----|-------------|-------------|-------------|---|--------------|-------------|-------------|
| D1 |             |             |             | H | -7.98085200  | -1.88479100 | -1.96173100 |
| C  | 2.48377100  | 1.91207000  | -0.41856900 | C | -9.93381600  | 0.28550600  | -0.20314800 |
| C  | 1.08038400  | 2.01332600  | 0.24209200  | H | -9.17817700  | 1.74981800  | 1.17973400  |
| C  | 0.13362500  | 0.91184800  | -0.25042000 | H | -10.36660500 | -1.25938200 | -1.64310600 |
| C  | 1.88818300  | -0.40933600 | -1.16346600 | H | -10.97284800 | 0.55973500  | -0.05620600 |
| C  | 3.00129400  | 0.46825600  | -0.57914800 | H | 3.31637200   | 0.06568900  | 0.38464200  |
| H  | 1.20239300  | 1.89020500  | 1.32337700  | N | -4.20340600  | -2.86921000 | 0.27195600  |
| H  | 2.41641200  | 2.33706800  | -1.42972200 | H | -4.14335700  | -3.61576000 | -0.40039600 |
| H  | 1.57214700  | 0.00176900  | -2.13286000 | C | -4.71408300  | -4.65927100 | 1.85287300  |
| H  | -0.19433700 | 1.12865800  | -1.27970500 | H | -3.90093900  | -5.05327900 | 2.46716100  |
| O  | 0.77850900  | -0.34555600 | -0.24370000 | H | -5.63369500  | -4.74697500 | 2.43345000  |
| O  | 3.44840200  | 2.63681800  | 0.33384100  | H | -4.80113400  | -5.27161100 | 0.95309400  |
| C  | 2.19939700  | -1.88334900 | -1.37238500 | N | 0.40853300   | 3.29388600  | -0.03026100 |
| H  | 2.35545000  | -2.37117700 | -0.40227800 | H | -0.49462900  | 3.25105900  | -0.49151400 |
| H  | 3.11508300  | -1.98576000 | -1.94865100 | C | -0.14002600  | 5.65487200  | 0.23774700  |
| H  | 3.03917700  | 3.45451500  | 0.69681100  | H | -0.43275400  | 6.06772100  | 1.20585300  |
| O  | 1.17701500  | -2.52731600 | -2.12237200 | H | 0.40191300   | 6.43940100  | -0.29418700 |
| H  | 0.34714000  | -2.52515500 | -1.62720200 | H | -1.03544000  | 5.38886700  | -0.32512600 |
| C  | -2.46248400 | -1.09651900 | 0.41046500  | C | 0.79596500   | 4.49053500  | 0.47521400  |
| C  | -3.81256000 | -1.54061000 | -0.18256600 | O | 1.85384100   | 4.64581700  | 1.09110700  |
| C  | -2.18898000 | 0.35791000  | 0.02242700  | C | -4.44784400  | -3.19232600 | 1.57684200  |
| H  | -2.50142900 | -1.16211600 | 1.50293300  | O | -4.45473100  | -2.35530300 | 2.47047800  |
| C  | -4.94111400 | -0.51155200 | 0.04813400  | C | 5.35608800   | 0.00466100  | -1.13601400 |
| H  | -3.68144100 | -1.61116400 | -1.26542700 | C | 6.16696100   | 0.91203900  | -0.18474000 |
| C  | -3.36410600 | 1.21950800  | 0.49582600  | H | 5.90302300   | -0.04305900 | -2.08939500 |
| H  | -2.12284600 | 0.43991700  | -1.06708800 | C | 6.44545200   | -1.98387900 | -0.40695500 |
| H  | -5.28798800 | -0.54102600 | 1.08530100  | C | 7.50653900   | 0.23397200  | 0.12626500  |
| H  | -3.55169800 | 1.04321700  | 1.56592200  | H | 6.34571300   | 1.86142900  | -0.70621900 |
| O  | -4.50395100 | 0.81406200  | -0.26571100 | C | 7.26663200   | -1.19433200 | 0.61635400  |
| O  | -5.96950700 | -0.84220400 | -0.83365400 | H | 6.99946400   | -2.04125900 | -1.35602100 |
| O  | -0.97022800 | 0.84915500  | 0.59927800  | H | 8.13085800   | 0.19638900  | -0.77212500 |
| C  | -3.15302800 | 2.71512100  | 0.31464900  | H | 6.70064400   | -1.15608100 | 1.55584900  |
| H  | -4.10990100 | 3.23019500  | 0.44603300  | O | 5.20065700   | -1.30611700 | -0.61863900 |
| H  | -2.46432400 | 3.06973000  | 1.08067800  | O | 8.50603000   | -1.87218200 | 0.82616600  |
| O  | -2.55484800 | 3.07404800  | -0.93448600 | O | 8.24747000   | 0.96925700  | 1.09189500  |
| H  | -3.18129800 | 2.91893400  | -1.65190000 | O | 5.55408400   | 1.14729100  | 1.07017900  |
| O  | -1.47605500 | -1.98898700 | -0.09088000 | C | 6.12775700   | -3.40973500 | 0.04831900  |
| H  | -0.60920000 | -1.65031200 | 0.18604400  | H | 5.69544900   | -3.38356600 | 1.05896500  |
| O  | 4.09714900  | 0.50640500  | -1.50370100 | H | 5.38323600   | -3.83999300 | -0.62374700 |
| C  | -7.25901300 | -0.42050300 | -0.57505600 | O | 7.26399000   | -4.25314900 | -0.00843000 |
| C  | -7.58522200 | 0.61013900  | 0.30610400  | H | 7.98893500   | -3.81745100 | 0.46362600  |
| C  | -8.26136400 | -1.08978000 | -1.27972700 | H | 9.07830100   | -1.28729600 | 1.34161400  |
| C  | -8.92669700 | 0.94959000  | 0.49098900  | H | 7.59987100   | 1.32198100  | 1.72244700  |
| H  | -6.81095200 | 1.15966000  | 0.82524700  | H | 4.82933600   | 1.79477900  | 0.95288800  |
| C  | -9.59230700 | -0.73358700 | -1.09375500 |   |              |             |             |

|    |             |             |             |   |              |             |             |
|----|-------------|-------------|-------------|---|--------------|-------------|-------------|
| E1 |             |             |             | H | -8.16516100  | -1.91529500 | -0.96983700 |
| C  | 2.53346000  | 2.02867400  | -0.50241400 | C | -9.12715000  | -1.37770000 | 2.25470000  |
| C  | 1.14439600  | 2.43273200  | 0.06166400  | H | -7.93662000  | -0.34733800 | 3.72031700  |
| C  | 0.06993000  | 1.47746600  | -0.47786600 | H | -10.06945300 | -2.33796700 | 0.57016200  |
| C  | 1.56251600  | -0.26150800 | -0.95899500 | H | -9.95376900  | -1.56166900 | 2.93227200  |
| C  | 2.79234300  | 0.50258800  | -0.45268300 | H | 3.01568500   | 0.19942800  | 0.57150100  |
| H  | 1.17301500  | 2.32367300  | 1.15164900  | N | -3.79739500  | -2.11977100 | -1.50150900 |
| H  | 2.58363400  | 2.32929300  | -1.55807100 | H | -4.53527900  | -2.37380300 | -2.13817200 |
| H  | 1.39103300  | 0.00914500  | -2.01189100 | C | -3.32998200  | -4.50342700 | -1.62040000 |
| H  | -0.03561000 | 1.58771500  | -1.56603500 | H | -2.46275200  | -4.84332300 | -2.19128800 |
| O  | 0.44484200  | 0.15750300  | -0.17588200 | H | -3.47568600  | -5.20722000 | -0.79919300 |
| O  | 3.58476300  | 2.64850500  | 0.22091500  | H | -4.20710600  | -4.52682900 | -2.26988400 |
| C  | 1.59432700  | -1.78039200 | -0.87687000 | N | 0.69573900   | 3.79145500  | -0.29222700 |
| H  | 1.68569500  | -2.10320100 | 0.16342800  | H | -0.31030200  | 3.86397100  | -0.35880000 |
| H  | 2.44657200  | -2.16819500 | -1.43193000 | C | 0.55014300   | 6.20853900  | -0.51847300 |
| H  | 3.44756700  | 3.62290000  | 0.18605500  | H | 0.60973800   | 6.85511200  | 0.35986700  |
| O  | 0.39126700  | -2.29364500 | -1.46711000 | H | 0.99329500   | 6.75573700  | -1.35243800 |
| H  | -0.19201300 | -2.68476000 | -0.79867600 | H | -0.49922400  | 6.00891300  | -0.74112900 |
| C  | -2.32585800 | -0.17354000 | -0.89532700 | C | 1.37611700   | 4.96500800  | -0.26016200 |
| C  | -3.75219800 | -0.69745000 | -1.16068300 | O | 2.58750500   | 5.06201300  | -0.05292600 |
| C  | -2.36677600 | 1.29644100  | -0.44695100 | C | -3.01982900  | -3.13594600 | -1.04076000 |
| H  | -1.86541100 | -0.75898700 | -0.10307900 | O | -2.10938900  | -2.99333800 | -0.22510700 |
| C  | -4.71068900 | -0.36702700 | -0.01086800 | C | 5.04400600   | -0.42260000 | -0.83116800 |
| H  | -4.13326900 | -0.16479700 | -2.03745400 | C | 5.97549900   | 0.45059100  | 0.03901600  |
| C  | -3.41629600 | 1.51969000  | 0.65322200  | H | 5.60200500   | -0.68624900 | -1.74201100 |
| H  | -2.59537000 | 1.92909500  | -1.31165800 | C | 5.75766100   | -2.45513600 | 0.18375500  |
| H  | -4.43804100 | -0.90981900 | 0.90601800  | C | 7.17059300   | -0.39665100 | 0.49190100  |
| H  | -3.09083000 | 0.98191800  | 1.55642300  | H | 6.32802400   | 1.28058600  | -0.58714600 |
| O  | -4.69261600 | 1.03007000  | 0.23204000  | C | 6.67641800   | -1.68972200 | 1.14055700  |
| O  | -5.99780900 | -0.72323900 | -0.42347600 | H | 6.31702400   | -2.72303900 | -0.72538800 |
| O  | -1.14014100 | 1.76107300  | 0.15769000  | H | 7.80234000   | -0.65176600 | -0.36485500 |
| C  | -3.61954600 | 2.98681000  | 1.01455700  | H | 6.10100700   | -1.43662400 | 2.04016600  |
| H  | -4.37992500 | 3.04978800  | 1.80255500  | O | 4.65234200   | -1.61278500 | -0.16392800 |
| H  | -2.68906900 | 3.39859900  | 1.40370700  | O | 7.77523900   | -2.53253800 | 1.49076200  |
| O  | -3.98040100 | 3.78657500  | -0.10259300 | O | 8.00127000   | 0.32178700  | 1.39560500  |
| H  | -4.83195700 | 3.47710300  | -0.43685500 | O | 5.38415400   | 0.94731700  | 1.22626000  |
| O  | -1.58478000 | -0.29683300 | -2.09839300 | C | 5.19331300   | -3.74027100 | 0.79305100  |
| H  | -0.89828700 | -0.98186800 | -1.98399100 | H | 4.74639200   | -3.51614700 | 1.77237200  |
| O  | 3.90221700  | 0.22815100  | -1.32057400 | H | 4.40428500   | -4.12461700 | 0.14421400  |
| C  | -6.99610300 | -0.90442400 | 0.51468400  | O | 6.17243000   | -4.75894300 | 0.89091600  |
| C  | -6.92602000 | -0.45132100 | 1.83182100  | H | 6.94895300   | -4.39007500 | 1.33740800  |
| C  | -8.13068500 | -1.57993700 | 0.06094500  | H | 8.42541700   | -1.98928900 | 1.95707200  |
| C  | -7.99426900 | -0.70032600 | 2.69565400  | H | 7.40635700   | 0.85744100  | 1.94395900  |
| H  | -6.07019200 | 0.11241300  | 2.17883200  | H | 4.78679200   | 1.68761900  | 0.99512700  |
| C  | -9.19116300 | -1.81161800 | 0.92963100  |   |              |             |             |

|    |             |             |             |   |              |             |             |
|----|-------------|-------------|-------------|---|--------------|-------------|-------------|
| F1 |             |             |             | H | -8.28729100  | -1.55782600 | -1.92301200 |
| C  | 2.40327500  | 1.84784600  | -0.52938600 | C | -10.02657700 | 0.29082800  | 0.35184400  |
| C  | 0.99546500  | 1.93270400  | 0.11764300  | H | -9.11718700  | 1.48939200  | 1.88935500  |
| C  | 0.07505500  | 0.80526500  | -0.37695500 | H | -10.62042200 | -0.98069100 | -1.28477000 |
| C  | 1.87005700  | -0.53589400 | -1.16732800 | H | -11.04191400 | 0.54244600  | 0.63857800  |
| C  | 2.94067300  | 0.40899300  | -0.60732000 | H | 3.23310000   | 0.06526900  | 0.38536600  |
| H  | 1.10910000  | 1.81617200  | 1.20089900  | N | -4.29607900  | -2.89275000 | -0.20676400 |
| H  | 2.33535100  | 2.22717300  | -1.55868000 | H | -4.24497200  | -3.54367600 | -0.97281900 |
| H  | 1.58858300  | -0.20456800 | -2.17956500 | C | -4.61353200  | -4.89671100 | 1.15296000  |
| H  | -0.21955500 | 0.99418400  | -1.42322400 | H | -3.72614000  | -5.33893400 | 1.61248500  |
| O  | 0.72060200  | -0.45114000 | -0.30933100 | H | -5.45842300  | -5.09876300 | 1.81285700  |
| O  | 3.35047100  | 2.61986100  | 0.19718500  | H | -4.78796300  | -5.38261500 | 0.19081100  |
| C  | 2.29428900  | -2.00008400 | -1.26432000 | N | 0.29463900   | 3.19697600  | -0.17120300 |
| H  | 3.03510300  | -2.08669000 | -2.06633300 | H | -0.64911200  | 3.12077400  | -0.53741400 |
| H  | 1.42128600  | -2.59116200 | -1.55268100 | C | -0.30048500  | 5.55388700  | 0.02540700  |
| H  | 2.92722000  | 3.45716700  | 0.50041000  | H | -0.49435100  | 6.05067800  | 0.97840400  |
| O  | 2.78049500  | -2.53792100 | -0.05404100 | H | 0.17151200   | 6.29068200  | -0.62859900 |
| H  | 3.70356600  | -2.25728200 | 0.03667600  | H | -1.24431000  | 5.23157400  | -0.41409200 |
| C  | -2.53825300 | -1.14799600 | -0.00412700 | C | 0.67572700   | 4.42354000  | 0.26481200  |
| C  | -3.95206500 | -1.50712900 | -0.50393900 | O | 1.76007700   | 4.63804500  | 0.81461900  |
| C  | -2.29075700 | 0.35436600  | -0.15416100 | C | -4.41438600  | -3.39646300 | 1.05796700  |
| H  | -2.44465400 | -1.40873900 | 1.05564000  | O | -4.36623800  | -2.68761500 | 2.05517200  |
| C  | -5.04299800 | -0.53402900 | -0.01542900 | C | 5.34087700   | 0.02271500  | -1.09276900 |
| H  | -3.93562500 | -1.42061700 | -1.59344900 | C | 6.04978800   | 0.99971100  | -0.13055800 |
| C  | -3.42533700 | 1.13056400  | 0.52051200  | H | 5.91978900   | 0.00398400  | -2.02664700 |
| H  | -2.27965800 | 0.61296800  | -1.21838600 | C | 6.62122400   | -1.85673900 | -0.35187700 |
| H  | -5.28025300 | -0.70882400 | 1.03771600  | C | 7.44553000   | 0.45385400  | 0.19698700  |
| H  | -3.52141500 | 0.81681800  | 1.57086500  | H | 6.14367200   | 1.96078900  | -0.65152000 |
| O  | -4.62664000 | 0.82262100  | -0.18931900 | C | 7.34471600   | -0.99209600 | 0.68287400  |
| O  | -6.16152200 | -0.74180100 | -0.82320600 | H | 7.17472800   | -1.83916800 | -1.30174600 |
| O  | -1.05267300 | 0.77281900  | 0.43912100  | H | 8.08238300   | 0.48078200  | -0.69297800 |
| C  | -3.23185500 | 2.63953900  | 0.50615400  | H | 6.76520900   | -1.01367100 | 1.61467900  |
| H  | -4.17052100 | 3.12312100  | 0.79454900  | O | 5.30842600   | -1.30564300 | -0.56100800 |
| H  | -2.46709200 | 2.91056400  | 1.23270700  | O | 8.64283200   | -1.54146700 | 0.90728800  |
| O  | -2.77076200 | 3.14744400  | -0.74998200 | O | 8.09703300   | 1.25585700  | 1.17270000  |
| H  | -3.46069000 | 3.03017000  | -1.41481000 | O | 5.39860000   | 1.17785200  | 1.11385100  |
| O  | -1.64281000 | -1.92199000 | -0.78674600 | C | 6.46560600   | -3.31661000 | 0.08146100  |
| H  | -0.73659200 | -1.74509100 | -0.48422500 | H | 6.03973300   | -3.35867500 | 1.09440300  |
| O  | 4.05999900  | 0.39501800  | -1.51221500 | H | 5.77232500   | -3.82032200 | -0.59476800 |
| C  | -7.41115600 | -0.35893800 | -0.37952700 | O | 7.69070300   | -4.02099100 | 0.00494900  |
| C  | -7.63497800 | 0.50660300  | 0.69107300  | H | 8.35799400   | -3.52240700 | 0.49943100  |
| C  | -8.48797700 | -0.89008000 | -1.09250800 | H | 9.14694500   | -0.90273600 | 1.43010500  |
| C  | -8.94662600 | 0.81861400  | 1.05329200  | H | 7.41026600   | 1.53972900  | 1.79675200  |
| H  | -6.80658100 | 0.95191800  | 1.22624900  | H | 4.65831200   | 1.80499000  | 0.98038800  |
| C  | -9.78865300 | -0.56227200 | -0.72714000 |   |              |             |             |

|    |             |             |             |   |              |             |             |
|----|-------------|-------------|-------------|---|--------------|-------------|-------------|
| G1 |             |             |             | H | -8.32212000  | -1.27120600 | -1.75707200 |
| C  | 2.52795400  | 1.74339800  | -0.55460100 | C | -9.88441400  | 0.22610300  | 0.87618000  |
| C  | 1.14783500  | 1.95361800  | 0.12705500  | H | -8.86434800  | 1.26485000  | 2.45985800  |
| C  | 0.18343700  | 0.83153800  | -0.28516900 | H | -10.59825900 | -0.86055600 | -0.84350700 |
| C  | 1.88188900  | -0.68434100 | -0.88208700 | H | -10.87416900 | 0.40487900  | 1.28226600  |
| C  | 3.01733000  | 0.27730800  | -0.50729100 | H | 3.37574200   | 0.04592300  | 0.49718900  |
| H  | 1.28572900  | 1.89666100  | 1.21287700  | N | -4.18290100  | -2.66174800 | -0.69235300 |
| H  | 2.43396400  | 2.01838400  | -1.61477900 | H | -4.25652400  | -3.15190800 | -1.56799000 |
| H  | 1.59250900  | -0.50932700 | -1.92890500 | C | -4.47417000  | -4.87397600 | 0.29998000  |
| H  | -0.04858600 | 0.91008000  | -1.35920200 | H | -3.65316600  | -5.42889300 | 0.75839900  |
| O  | 0.76706100  | -0.42289800 | -0.02977400 | H | -5.38416200  | -5.13034300 | 0.84644300  |
| O  | 3.53927200  | 2.52991600  | 0.05495200  | H | -4.58437200  | -5.19597200 | -0.73758000 |
| C  | 2.19385600  | -2.15773100 | -0.72252800 | N | 0.48113100   | 3.22175100  | -0.22523600 |
| H  | 2.38532800  | -2.38284000 | 0.33310900  | H | -0.51743500  | 3.15320700  | -0.39192000 |
| H  | 3.07569600  | -2.41962000 | -1.30841100 | C | -0.01809100  | 5.60648200  | -0.25859700 |
| H  | 3.19021800  | 3.43990600  | 0.20895900  | H | -0.01218000  | 6.26152800  | 0.61477900  |
| O  | 1.03439100  | -2.86381400 | -1.18391700 | H | 0.33934100   | 6.19828800  | -1.10487000 |
| H  | 1.14971400  | -3.80893100 | -1.03812400 | H | -1.03675400  | 5.27268400  | -0.45491400 |
| C  | -2.42265500 | -0.94540200 | -0.31920000 | C | 0.95679400   | 4.47551300  | -0.01395800 |
| C  | -3.87758200 | -1.23758500 | -0.75739300 | O | 2.11575400   | 4.71744600  | 0.33494700  |
| C  | -2.21049200 | 0.56768400  | -0.17759500 | C | -4.21034700  | -3.38857200 | 0.46185200  |
| H  | -2.22418400 | -1.42173900 | 0.64462900  | O | -4.04571500  | -2.88135000 | 1.56456600  |
| C  | -4.94040800 | -0.39547500 | -0.02922600 | C | 5.35546900   | -0.27273200 | -1.08947200 |
| H  | -3.94591400 | -0.95669000 | -1.81139600 | C | 6.18504700   | 0.77081900  | -0.31635000 |
| C  | -3.32597400 | 1.20372200  | 0.65550000  | H | 5.86224700   | -0.45175000 | -2.04895400 |
| H  | -2.22975000 | 1.01301800  | -1.17865800 | C | 6.53962000   | -2.12342000 | -0.12795800 |
| H  | -5.08350900 | -0.74015200 | 0.99951400  | C | 7.56806500   | 0.17719100  | -0.03296100 |
| H  | -3.35700500 | 0.74012300  | 1.65322200  | H | 6.28839700   | 1.65492400  | -0.95835200 |
| O  | -4.56378500 | 0.98047400  | -0.02099600 | C | 7.44852900   | -1.18109000 | 0.66441000  |
| O  | -6.12279500 | -0.51310500 | -0.76336300 | H | 7.02362100   | -2.35903600 | -1.08825200 |
| O  | -0.98286700 | 0.93456100  | 0.46525500  | H | 8.11437900   | 0.03718400  | -0.97152600 |
| C  | -3.15055100 | 2.70532400  | 0.84511700  | H | 7.02106100   | -1.03603100 | 1.66284700  |
| H  | -4.07462100 | 3.12238700  | 1.25863200  | O | 5.26703700   | -1.49893300 | -0.37692700 |
| H  | -2.34231300 | 2.88741400  | 1.55162900  | O | 8.72391200   | -1.80564500 | 0.75805100  |
| O  | -2.78105000 | 3.39296500  | -0.35342700 | O | 8.35788200   | 1.06479800  | 0.74860400  |
| H  | -3.51358900 | 3.35155900  | -0.98086900 | O | 5.64397300   | 1.13545000  | 0.94066700  |
| O  | -1.60782700 | -1.49946000 | -1.34212600 | C | 6.23585300   | -3.42847300 | 0.59694900  |
| H  | -0.76643300 | -1.83541700 | -0.99299200 | H | 5.66144800   | -4.08088300 | -0.07501800 |
| O  | 4.06851300  | 0.13163100  | -1.47420100 | H | 7.17149300   | -3.92746700 | 0.84840400  |
| C  | -7.33409400 | -0.23540800 | -0.16371200 | O | 5.53895400   | -3.22551700 | 1.81731900  |
| C  | -7.47752100 | 0.48649900  | 1.02124300  | H | 4.79386300   | -2.63664400 | 1.64203900  |
| C  | -8.45999900 | -0.71615900 | -0.83572200 | H | 9.32862900   | -1.16722800 | 1.15931400  |
| C  | -8.75652400 | 0.70481300  | 1.53638500  | H | 7.76101100   | 1.45776100  | 1.40430700  |
| H  | -6.61318500 | 0.89557800  | 1.52751900  | H | 4.91500200   | 1.76991200  | 0.78675000  |
| C  | -9.72820500 | -0.48228400 | -0.31640300 |   |              |             |             |

|    |             |             |             |   |              |             |             |
|----|-------------|-------------|-------------|---|--------------|-------------|-------------|
| G2 |             |             |             | H | -8.38427200  | -1.24819200 | -1.32727700 |
| C  | 2.61557300  | 1.96354300  | -0.41396100 | C | -9.61484800  | -0.29958200 | 1.70659500  |
| C  | 1.21279700  | 2.05428500  | 0.23754900  | H | -8.42062000  | 0.52843700  | 3.29279200  |
| C  | 0.21706200  | 1.05932000  | -0.37893500 | H | -10.52227600 | -1.13278300 | -0.06284100 |
| C  | 1.97990200  | -0.33336000 | -1.17656400 | H | -10.54345000 | -0.24996100 | 2.26508100  |
| C  | 3.08822100  | 0.50371300  | -0.51559000 | H | 3.30052000   | 0.09631400  | 0.47518900  |
| H  | 1.31056000  | 1.77233400  | 1.29012700  | N | -4.05535300  | -2.47327800 | -1.12341100 |
| H  | 2.55053000  | 2.36336000  | -1.42887500 | H | -4.12476300  | -2.79123900 | -2.07554700 |
| H  | 1.77364000  | 0.07079800  | -2.17798500 | C | -4.11621800  | -4.85303900 | -0.58798000 |
| H  | -0.03458800 | 1.33219600  | -1.40727900 | H | -3.23240300  | -5.42177100 | -0.29206500 |
| O  | 0.80984500  | -0.24159700 | -0.36700500 | H | -4.97059900  | -5.28230000 | -0.06035100 |
| O  | 3.52057100  | 2.79661800  | 0.29420100  | H | -4.27153600  | -4.97167900 | -1.66242700 |
| C  | 2.28000900  | -1.81208600 | -1.31809900 | N | 0.69556900   | 3.41760900  | 0.22177200  |
| H  | 2.39458000  | -2.26087600 | -0.32358500 | H | 0.70273600   | 3.91937900  | 1.09374100  |
| H  | 3.20439600  | -1.95375500 | -1.88178800 | C | -0.22594200  | 5.48771500  | -0.67338600 |
| H  | 4.07312600  | 2.25407700  | 0.88135000  | H | 0.03984100   | 6.12539300  | -1.51594100 |
| O  | 1.16249500  | -2.38469300 | -2.00370600 | H | -1.31645400  | 5.41117200  | -0.63115700 |
| H  | 1.26118900  | -3.34161200 | -2.05012800 | H | 0.12452600   | 5.94883200  | 0.25350800  |
| C  | -2.35763600 | -0.74187900 | -0.57313800 | C | 0.33621500   | 4.09918500  | -0.90729400 |
| C  | -3.82779100 | -1.04441200 | -0.93289200 | O | 0.41177700   | 3.60731800  | -2.02574800 |
| C  | -2.17265000 | 0.74477700  | -0.22247800 | C | -3.94194200  | -3.41178400 | -0.14209100 |
| H  | -2.06760700 | -1.33670400 | 0.29857300  | O | -3.73229700  | -3.12686800 | 1.03089800  |
| C  | -4.82730900 | -0.42647100 | 0.05513400  | C | 5.47571100   | -0.01775900 | -0.83879200 |
| H  | -4.02663600 | -0.57223200 | -1.89855600 | C | 6.17680200   | 0.85828500  | 0.21567300  |
| C  | -3.24302900 | 1.20955900  | 0.77333400  | H | 6.13972500   | -0.03318500 | -1.71501100 |
| H  | -2.24552900 | 1.34473400  | -1.13574100 | C | 6.55497200   | -2.01443600 | -0.08534200 |
| H  | -4.79653700 | -0.93552000 | 1.02349500  | C | 7.50179900   | 0.19995100  | 0.60919800  |
| H  | -3.11854300 | 0.65683300  | 1.71714200  | H | 6.37101000   | 1.83749200  | -0.23719000 |
| O  | -4.54031400 | 0.95547900  | 0.22623000  | C | 7.28460300   | -1.24955700 | 1.02946200  |
| O  | -6.09813100 | -0.53272800 | -0.52009400 | H | 7.18329100   | -2.02514400 | -0.99014800 |
| O  | -0.91864500 | 1.01048100  | 0.42010700  | H | 8.18931900   | 0.22164800  | -0.24775400 |
| C  | -3.19730400 | 2.70109200  | 1.08336400  | H | 6.66790500   | -1.27476500 | 1.93145900  |
| H  | -3.96123200 | 2.92251200  | 1.83998500  | O | 5.31345500   | -1.35741500 | -0.36875400 |
| H  | -2.21981100 | 2.95616600  | 1.49009500  | O | 8.58049800   | -1.78814900 | 1.30526400  |
| O  | -3.38090700 | 3.51252000  | -0.06773900 | O | 8.03798300   | 0.97448400  | 1.67681900  |
| H  | -4.22689700 | 3.27681800  | -0.47037400 | O | 5.36715500   | 1.02495600  | 1.38166200  |
| O  | -1.60973900 | -1.12729200 | -1.71710500 | C | 6.21954800   | -3.45402000 | 0.28114800  |
| H  | -0.70385500 | -1.37660100 | -1.47511100 | H | 5.64428300   | -3.90025600 | -0.53888100 |
| O  | 4.27219200  | 0.45444800  | -1.34094100 | H | 7.13843100   | -4.03231600 | 0.39394600  |
| C  | -7.21985100 | -0.42848700 | 0.27246800  | O | 5.52604500   | -3.56516500 | 1.51576100  |
| C  | -7.22292400 | 0.08063500  | 1.57170200  | H | 4.68668000   | -3.09326900 | 1.44311000  |
| C  | -8.41155200 | -0.86123400 | -0.31457900 | H | 8.49884600   | -2.51445400 | 1.93404000  |
| C  | -8.42364000 | 0.13346600  | 2.28171200  | H | 8.79497800   | 0.49695400  | 2.04169700  |
| H  | -6.31249600 | 0.45481400  | 2.02072000  | H | 5.95777100   | 1.32451900  | 2.08983200  |
| C  | -9.60144000 | -0.79336300 | 0.40091500  |   |              |             |             |

|    |             |             |             |   |              |             |             |
|----|-------------|-------------|-------------|---|--------------|-------------|-------------|
| H1 |             |             |             | H | -7.99043200  | -1.74748700 | -1.96712600 |
| C  | 2.55739000  | 1.84690400  | -0.41370400 | C | -9.89071100  | 0.42873600  | -0.15884800 |
| C  | 1.15630300  | 1.95789800  | 0.25149700  | H | -9.09782900  | 1.86378500  | 1.23381500  |
| C  | 0.18851200  | 0.88479200  | -0.26200500 | H | -10.36294500 | -1.09073500 | -1.61331100 |
| C  | 1.91775900  | -0.44769800 | -1.20607800 | H | -10.92379600 | 0.71641600  | 0.00351700  |
| C  | 3.04890100  | 0.39785500  | -0.60930700 | H | 3.36203200   | -0.02727400 | 0.34550900  |
| H  | 1.27849800  | 1.80874700  | 1.32951500  | N | -4.21295200  | -2.82934000 | 0.20251800  |
| H  | 2.49675300  | 2.29661300  | -1.41460900 | H | -4.17567200  | -3.56278600 | -0.48567800 |
| H  | 1.60850700  | -0.01262600 | -2.16709800 | C | -4.74716900  | -4.64000100 | 1.75214100  |
| H  | -0.13753200 | 1.12875000  | -1.28576200 | H | -3.94262000  | -5.05994900 | 2.36043500  |
| O  | 0.81140800  | -0.38443400 | -0.28376000 | H | -5.66920800  | -4.72094600 | 2.32994900  |
| O  | 3.53524400  | 2.53438400  | 0.35509300  | H | -4.84435100  | -5.23439500 | 0.84144600  |
| C  | 2.20370400  | -1.92223200 | -1.44504500 | N | 0.50656000   | 3.25570500  | 0.00898600  |
| H  | 2.33958300  | -2.43288500 | -0.48248300 | H | -0.40000400  | 3.23880600  | -0.44711800 |
| H  | 3.12273500  | -2.02971700 | -2.01523200 | C | -0.00084400  | 5.61918900  | 0.33250000  |
| H  | 3.14271200  | 3.35332600  | 0.73317900  | H | -0.28245900  | 6.01478200  | 1.31106200  |
| O  | 1.17717900  | -2.53481500 | -2.21330000 | H | 0.55219500   | 6.40636600  | -0.18385100 |
| H  | 0.34199800  | -2.52136400 | -1.72700300 | H | -0.90304300  | 5.38131700  | -0.23216700 |
| C  | -2.43939900 | -1.09138500 | 0.36145700  | C | 0.91636600   | 4.43429900  | 0.53952800  |
| C  | -3.80223400 | -1.49903000 | -0.22873100 | O | 1.97909000   | 4.55791200  | 1.15376600  |
| C  | -2.14367600 | 0.36700000  | 0.00671200  | C | -4.45323400  | -3.17361200 | 1.50285100  |
| H  | -2.46948200 | -1.18270600 | 1.45227900  | O | -4.43582300  | -2.35446000 | 2.41269500  |
| C  | -4.91077100 | -0.45516800 | 0.03192400  | C | 5.39994500   | -0.07632000 | -1.18430800 |
| H  | -3.68139900 | -1.54992000 | -1.31390400 | C | 6.21267900   | 0.80142900  | -0.21285600 |
| C  | -3.30101700 | 1.23660800  | 0.50799400  | H | 5.94242800   | -0.10248000 | -2.14075100 |
| H  | -2.08150100 | 0.47461300  | -1.08078200 | C | 6.49316000   | -2.09444700 | -0.49031200 |
| H  | -5.25117200 | -0.50044900 | 1.07063800  | C | 7.56360200   | 0.12581200  | 0.04086200  |
| H  | -3.48578500 | 1.03735200  | 1.57452400  | H | 6.37268500   | 1.77352900  | -0.69696100 |
| O  | -4.45169100 | 0.86893400  | -0.25640400 | C | 7.37437300   | -1.32436500 | 0.49584300  |
| O  | -5.95085300 | -0.74882700 | -0.84912100 | H | 7.02462200   | -2.18031400 | -1.45061000 |
| O  | -0.91369900 | 0.82356000  | 0.58907600  | H | 8.15846200   | 0.12427400  | -0.87845400 |
| C  | -3.06458800 | 2.73227900  | 0.36235300  | H | 6.89103400   | -1.33389500 | 1.47909300  |
| H  | -4.01115900 | 3.26093700  | 0.51277000  | O | 5.25003000   | -1.39869000 | -0.69514100 |
| H  | -2.36500900 | 3.05543200  | 1.13245600  | O | 8.62914800   | -1.99330600 | 0.55322100  |
| O  | -2.46772300 | 3.11118000  | -0.88152200 | O | 8.32729800   | 0.84954700  | 0.99777900  |
| H  | -3.10225400 | 2.98789900  | -1.59800000 | O | 5.61258800   | 0.97760100  | 1.05852000  |
| O  | -1.47272100 | -1.98814500 | -0.17062700 | C | 6.12382800   | -3.49364900 | -0.01262800 |
| H  | -0.59899500 | -1.67543700 | 0.11458000  | H | 5.57136500   | -4.00667900 | -0.81089400 |
| O  | 4.13830200  | 0.42992000  | -1.54036300 | H | 7.03488200   | -4.05400800 | 0.19574200  |
| C  | -7.23132300 | -0.31202500 | -0.57029200 | O | 5.37049400   | -3.47800400 | 1.19098100  |
| C  | -7.53199700 | 0.71195200  | 0.32755200  | H | 4.60780000   | -2.90136800 | 1.05735500  |
| C  | -8.25134000 | -0.95721900 | -1.27196400 | H | 9.22151900   | -1.44929800 | 1.08924400  |
| C  | -8.86605400 | 1.06885300  | 0.53214800  | H | 7.70291900   | 1.14742200  | 1.67740600  |
| H  | -6.74354400 | 1.24326400  | 0.84426500  | H | 4.90090000   | 1.64312900  | 0.97720000  |
| C  | -9.57464200 | -0.58369900 | -1.06626100 |   |              |             |             |



|    |             |             |             |   |             |             |             |
|----|-------------|-------------|-------------|---|-------------|-------------|-------------|
| H2 |             |             |             | H | 8.03837400  | -2.11206600 | 1.47852500  |
| C  | -2.62016800 | 2.07772300  | -0.08271100 | C | 9.80799100  | 0.01175800  | -0.51533300 |
| C  | -1.18938800 | 2.04023400  | -0.68267200 | H | 8.92343500  | 1.53896800  | -1.74526000 |
| C  | -0.19421000 | 1.28901400  | 0.21154700  | H | 10.37730800 | -1.58282800 | 0.81934800  |
| C  | -1.97742500 | 0.12382000  | 1.34035800  | H | 10.82546300 | 0.24511400  | -0.81013800 |
| C  | -3.07458100 | 0.70290000  | 0.43366300  | H | -3.26030200 | 0.01494000  | -0.39388000 |
| H  | -1.23354000 | 1.47675300  | -1.61859800 | N | 3.88981700  | -2.86284200 | -0.01446200 |
| H  | -2.61663700 | 2.75628200  | 0.77410900  | H | 3.80635600  | -3.55827100 | 0.70811500  |
| H  | -1.80224300 | 0.80591900  | 2.18267200  | C | 4.12307700  | -4.79150500 | -1.49085700 |
| H  | 0.02979800  | 1.83660100  | 1.13243400  | H | 3.22833000  | -5.14974200 | -2.00583500 |
| O  | -0.78266000 | 0.02587600  | 0.55161900  | H | 4.97777500  | -5.00217300 | -2.13540000 |
| O  | -3.49268700 | 2.63451900  | -1.05549400 | H | 4.23524600  | -5.34717100 | -0.55752700 |
| C  | -2.23051700 | -1.27136000 | 1.89528700  | N | -0.73277500 | 3.38223500  | -1.03520600 |
| H  | -2.34164800 | -1.97979400 | 1.06187700  | H | -0.82288400 | 3.63744500  | -2.00522200 |
| H  | -3.15509400 | -1.27834300 | 2.46802800  | C | -0.34213600 | 5.77320700  | -0.72223500 |
| H  | -4.09709700 | 1.94942700  | -1.38922700 | H | -1.25700700 | 6.36311300  | -0.61975800 |
| O  | -1.20192100 | -1.68334800 | 2.78028500  | H | 0.43754000  | 6.27391900  | -0.14751800 |
| H  | -0.35923700 | -1.71497300 | 2.30622900  | H | -0.05790400 | 5.75532400  | -1.77673100 |
| C  | 2.29963600  | -0.95750100 | -0.14017200 | C | -0.58316200 | 4.39703600  | -0.12903400 |
| C  | 3.64726300  | -1.47959100 | 0.38033900  | O | -0.63646300 | 4.21488600  | 1.07858300  |
| C  | 2.10059600  | 0.52465700  | 0.20198600  | C | 4.00919600  | -3.28958100 | -1.30484100 |
| H  | 2.27992100  | -1.05237900 | -1.23158900 | O | 4.02671600  | -2.52096200 | -2.25791000 |
| C  | 4.79994400  | -0.54621700 | -0.02369800 | C | -5.45224600 | 0.22467200  | 0.88880100  |
| H  | 3.61429900  | -1.47187300 | 1.47302000  | C | -6.18937900 | 0.73203700  | -0.36508300 |
| C  | 3.32590800  | 1.34492000  | -0.22207100 | H | -6.11608200 | 0.42834600  | 1.74144800  |
| H  | 1.94110600  | 0.64748800  | 1.27748500  | C | -6.41766700 | -1.95485300 | 0.73077600  |
| H  | 4.97690300  | -0.58034700 | -1.10329300 | C | -7.46055500 | -0.09404600 | -0.57562900 |
| H  | 3.41113100  | 1.32180300  | -1.31885500 | H | -6.45694800 | 1.78174300  | -0.19533000 |
| O  | 4.50020200  | 0.78536100  | 0.37750400  | C | -7.14632900 | -1.58551800 | -0.56936000 |
| O  | 5.93388800  | -0.96014600 | 0.67919000  | H | -7.06668100 | -1.72788900 | 1.59146800  |
| O  | 0.96051200  | 1.02942000  | -0.52179500 | H | -8.17374600 | 0.12076900  | 0.23229400  |
| C  | 3.28131100  | 2.79636100  | 0.24453700  | H | -6.49152600 | -1.82131500 | -1.41204900 |
| H  | 4.14614200  | 3.32633400  | -0.17540000 | O | -5.21526800 | -1.17923000 | 0.81941000  |
| H  | 2.37328100  | 3.27454500  | -0.12263300 | O | -8.39749800 | -2.26181500 | -0.71322400 |
| O  | 3.25855800  | 2.90432800  | 1.65773700  | O | -8.00817600 | 0.31798200  | -1.82393800 |
| H  | 4.05079300  | 2.47116100  | 2.00171700  | O | -5.36183000 | 0.63493100  | -1.52603500 |
| O  | 1.29031300  | -1.78399500 | 0.43046600  | C | -6.01665000 | -3.42204300 | 0.81178700  |
| H  | 0.43394500  | -1.38414700 | 0.20704100  | H | -5.42491300 | -3.57680400 | 1.72110500  |
| O  | -4.27528200 | 0.88752900  | 1.21360800  | H | -6.91127600 | -4.04286700 | 0.88827200  |
| C  | 7.18633400  | -0.58786000 | 0.23845500  | O | -5.31837400 | -3.87344700 | -0.34060100 |
| C  | 7.42671500  | 0.44757900  | -0.66512800 | H | -4.46290200 | -3.42829600 | -0.38018300 |
| C  | 8.25145800  | -1.31492800 | 0.77488600  | H | -8.24677200 | -3.13486500 | -1.09391900 |
| C  | 8.74038400  | 0.73363700  | -1.04091300 | H | -8.71616800 | -0.29762000 | -2.05665900 |
| H  | 6.61102900  | 1.04248900  | -1.05431400 | H | -5.95071300 | 0.69037100  | -2.29434300 |
| C  | 9.55520000  | -1.01220900 | 0.39913100  |   |             |             |             |

|    |             |             |             |   |              |             |             |
|----|-------------|-------------|-------------|---|--------------|-------------|-------------|
| I1 |             |             |             | H | -8.17982700  | -1.75026700 | -0.98780800 |
| C  | 2.61431200  | 1.92917700  | -0.50577400 | C | -9.11741800  | -1.22998200 | 2.24668900  |
| C  | 1.23390700  | 2.36039000  | 0.06066500  | H | -7.89712200  | -0.24747900 | 3.72067400  |
| C  | 0.13580900  | 1.43740500  | -0.48741900 | H | -10.08860800 | -2.14578900 | 0.55384200  |
| C  | 1.58787200  | -0.33155200 | -0.98490400 | H | -9.94596500  | -1.40225500 | 2.92496700  |
| C  | 2.83629500  | 0.39672300  | -0.47134500 | H | 3.05332600   | 0.08232900  | 0.55098100  |
| H  | 1.25937200  | 2.24019700  | 1.14960100  | N | -3.82341600  | -2.05509300 | -1.53560500 |
| H  | 2.67362600  | 2.23851200  | -1.55847400 | H | -4.58410500  | -2.28457100 | -2.15463700 |
| H  | 1.42651300  | -0.04742800 | -2.03581400 | C | -3.41877800  | -4.44775900 | -1.69233800 |
| H  | 0.03105800  | 1.56137800  | -1.57410300 | H | -2.57345100  | -4.80528400 | -2.28486600 |
| O  | 0.47887300  | 0.10491100  | -0.20027500 | H | -3.56584300  | -5.15542700 | -0.87467200 |
| O  | 3.67788500  | 2.51545200  | 0.22624800  | H | -4.30988900  | -4.44136000 | -2.32284600 |
| C  | 1.58134700  | -1.85135600 | -0.91967000 | N | 0.81826600   | 3.73299600  | -0.27977000 |
| H  | 1.63808800  | -2.18534400 | 0.12040100  | H | -0.18595300  | 3.83161700  | -0.33983600 |
| H  | 2.43685600  | -2.25451600 | -1.45905200 | C | 0.73135300   | 6.15444200  | -0.48740400 |
| H  | 3.56686800  | 3.49319500  | 0.19507000  | H | 0.81415400   | 6.79388600  | 0.39423000  |
| O  | 0.37923100  | -2.32917200 | -1.53786000 | H | 1.18135300   | 6.69552100  | -1.32170600 |
| H  | -0.22247100 | -2.72357600 | -0.88727700 | H | -0.32444700  | 5.98230100  | -0.70270400 |
| C  | -2.30056900 | -0.15189100 | -0.91456600 | C | 1.52813400   | 4.88917700  | -0.24297300 |
| C  | -3.73979500 | -0.63779500 | -1.18039000 | O | 2.74249700   | 4.95469400  | -0.04223300 |
| C  | -2.30475900 | 1.31415200  | -0.45094100 | C | -3.05947700  | -3.09494600 | -1.10663600 |
| H  | -1.85118800 | -0.75659300 | -0.13047700 | O | -2.12468700  | -2.98501300 | -0.31355000 |
| C  | -4.68576700 | -0.29646900 | -0.02328000 | C | 5.07522300   | -0.56259800 | -0.85975500 |
| H  | -4.11078400 | -0.08595500 | -2.04968600 | C | 6.02119200   | 0.29396800  | 0.00422800  |
| C  | -3.34480700 | 1.55198200  | 0.65526200  | H | 5.62085100   | -0.83433200 | -1.77539500 |
| H  | -2.52087700 | 1.96088100  | -1.30837600 | C | 5.77262800   | -2.61305400 | 0.17013900  |
| H  | -4.42269300 | -0.85521500 | 0.88685000  | C | 7.22612600   | -0.56386500 | 0.40133300  |
| H  | -3.02932100 | 0.99813700  | 1.55227400  | H | 6.35827400   | 1.13912400  | -0.60986900 |
| O  | -4.63391500 | 1.09698800  | 0.23399000  | C | 6.77392000   | -1.87106900 | 1.05878100  |
| O  | -5.98219100 | -0.61847500 | -0.43484200 | H | 6.28692800   | -2.94411200 | -0.74521000 |
| O  | -1.06541500 | 1.74271000  | 0.15414200  | H | 7.81818400   | -0.80927300 | -0.48641800 |
| C  | -3.51161800 | 3.02014400  | 1.03092500  | H | 6.29243100   | -1.64349100 | 2.01629200  |
| H  | -4.26818400 | 3.09398700  | 1.82162000  | O | 4.68014100   | -1.74656700 | -0.18407500 |
| H  | -2.57058200 | 3.40573000  | 1.42149800  | O | 7.88575100   | -2.73748600 | 1.25723500  |
| O  | -3.85590100 | 3.83868300  | -0.07780000 | O | 8.10025100   | 0.14879000  | 1.26823200  |
| H  | -4.71655700 | 3.55444100  | -0.41109600 | O | 5.45108500   | 0.76095900  | 1.21431100  |
| O  | -1.56707300 | -0.27966000 | -2.12208000 | C | 5.14731900   | -3.82798200 | 0.84479400  |
| H  | -0.89256700 | -0.97752800 | -2.01726400 | H | 4.51428000   | -4.35116600 | 0.11576000  |
| O  | 3.93458900  | 0.09649300  | -1.34370900 | H | 5.93646400   | -4.50530500 | 1.17038700  |
| C  | -6.98150100 | -0.78684500 | 0.50494700  | O | 4.40107900   | -3.48321800 | 2.00283000  |
| C  | -6.89581800 | -0.35212200 | 1.82728700  | H | 3.78238700   | -2.78260500 | 1.76034900  |
| C  | -8.13366200 | -1.42880800 | 0.04694400  | H | 8.56394100   | -2.23237400 | 1.72533700  |
| C  | -7.96687100 | -0.58601000 | 2.69191000  | H | 7.53354400   | 0.65203900  | 1.87329100  |
| H  | -6.02544200 | 0.18627500  | 2.17836200  | H | 4.86733000   | 1.51833100  | 1.01033900  |
| C  | -9.19651200 | -1.64556500 | 0.91658600  |   |              |             |             |

|    |             |             |             |   |             |             |             |
|----|-------------|-------------|-------------|---|-------------|-------------|-------------|
| I2 |             |             |             | H | -8.05519100 | -1.89859200 | -0.90775400 |
| C  | 2.63286900  | 2.10316500  | -0.23873500 | C | -8.84708800 | -1.75460000 | 2.40346100  |
| C  | 1.23492300  | 2.43046600  | 0.35307400  | H | -7.60644500 | -0.84802800 | 3.90886500  |
| C  | 0.13036300  | 1.61445100  | -0.33086500 | H | -9.85498400 | -2.55637900 | 0.67442000  |
| C  | 1.65790100  | -0.05293500 | -1.05456300 | H | -9.62807100 | -2.04121400 | 3.09940300  |
| C  | 2.87793700  | 0.58853500  | -0.37464800 | H | 3.03023900  | 0.12961900  | 0.60459200  |
| H  | 1.23229800  | 2.12563800  | 1.40320900  | N | -3.74926600 | -1.86093500 | -1.72844800 |
| H  | 2.68250100  | 2.52774000  | -1.24562900 | H | -4.53209500 | -2.03620500 | -2.33747300 |
| H  | 1.53817100  | 0.39324500  | -2.05303500 | C | -3.26076000 | -4.17880300 | -2.26493100 |
| H  | -0.00094600 | 1.89722000  | -1.37711500 | H | -2.46201500 | -4.37128700 | -2.98547000 |
| O  | 0.52246100  | 0.24335400  | -0.25271200 | H | -3.28090300 | -5.01720200 | -1.56700000 |
| O  | 3.61726100  | 2.76364300  | 0.54634200  | H | -4.21081500 | -4.13763600 | -2.80139900 |
| C  | 1.67578900  | -1.56680800 | -1.21995300 | N | 0.98372100  | 3.86872400  | 0.34574200  |
| H  | 1.73106300  | -2.04863500 | -0.23838700 | H | 1.15180100  | 4.35315900  | 1.21174000  |
| H  | 2.54499800  | -1.87039800 | -1.80272800 | C | 0.72104200  | 6.12082300  | -0.56087700 |
| H  | 4.16047800  | 2.10904500  | 1.01659700  | H | 1.53039400  | 6.62117900  | -1.09682600 |
| O  | 0.49698600  | -1.98034300 | -1.91678300 | H | -0.22015800 | 6.46367000  | -0.99506200 |
| H  | -0.11848600 | -2.44585600 | -1.32777200 | H | 0.75373200  | 6.42006200  | 0.48896700  |
| C  | -2.26764400 | 0.00748700  | -0.92366500 | C | 0.84155300  | 4.62366200  | -0.78331400 |
| C  | -3.69689000 | -0.49761200 | -1.19535700 | O | 0.79390900  | 4.13829100  | -1.90554700 |
| C  | -2.28944300 | 1.40521200  | -0.27464900 | C | -2.92238600 | -2.91252900 | -1.49837700 |
| H  | -1.76752700 | -0.67202900 | -0.23756800 | O | -1.94788300 | -2.88212200 | -0.74566300 |
| C  | -4.59581800 | -0.34541900 | 0.03542000  | C | 5.14127900  | -0.32283500 | -0.74803700 |
| H  | -4.12675800 | 0.14523600  | -1.96991900 | C | 6.02949500  | 0.39224300  | 0.28736500  |
| C  | -3.32195300 | 1.49576500  | 0.86129200  | H | 5.76326400  | -0.46371900 | -1.64406000 |
| H  | -2.50833600 | 2.15403400  | -1.04360000 | C | 5.81769000  | -2.49496000 | -0.01329500 |
| H  | -4.25675000 | -0.98821100 | 0.86153500  | C | 7.19856900  | -0.51990300 | 0.66478600  |
| H  | -2.95339400 | 0.89165100  | 1.70366300  | H | 6.41346000  | 1.30906600  | -0.17568300 |
| O  | -4.60395600 | 1.00758600  | 0.44528400  | C | 6.69768400  | -1.89422700 | 1.09334700  |
| O  | -5.89680800 | -0.69687500 | -0.34719400 | H | 6.41837700  | -2.62276000 | -0.92796100 |
| O  | -1.05654300 | 1.74743600  | 0.38386400  | H | 7.86155700  | -0.64011600 | -0.20337700 |
| C  | -3.56397500 | 2.92005600  | 1.35139700  | H | 6.09618100  | -1.79200600 | 1.99989200  |
| H  | -4.21524800 | 2.88153400  | 2.23474300  | O | 4.72680000  | -1.60393700 | -0.27533200 |
| H  | -2.61485500 | 3.37110400  | 1.63846600  | O | 7.86054400  | -2.68287500 | 1.36045800  |
| O  | -4.12511700 | 3.75266600  | 0.34928000  | O | 7.89913600  | 0.13161900  | 1.71949400  |
| H  | -4.95417200 | 3.35248300  | 0.05666800  | O | 5.28574800  | 0.72669200  | 1.46039900  |
| O  | -1.58613500 | 0.05079900  | -2.16671200 | C | 5.21394700  | -3.84435400 | 0.35401700  |
| H  | -0.84651600 | -0.58263400 | -2.15550200 | H | 4.54344800  | -4.16245800 | -0.45264600 |
| O  | 4.04445600  | 0.39200700  | -1.20657200 | H | 6.00555000  | -4.59087200 | 0.44138200  |
| C  | -6.83291900 | -1.01586100 | 0.61520300  | O | 4.54211200  | -3.82983400 | 1.60606800  |
| C  | -6.70213900 | -0.70828000 | 1.96974900  | H | 3.78503700  | -3.23401700 | 1.54399500  |
| C  | -7.97168100 | -1.67793300 | 0.15082700  | H | 7.63648200  | -3.38121300 | 1.98633200  |
| C  | -7.71143300 | -1.08924900 | 2.85585000  | H | 8.54295400  | -0.49303500 | 2.07952300  |
| H  | -5.84569400 | -0.15412500 | 2.33017300  | H | 5.93194100  | 0.92136500  | 2.15611600  |
| C  | -8.97349800 | -2.04185800 | 1.04335300  |   |             |             |             |

|    |             |             |             |   |              |             |             |
|----|-------------|-------------|-------------|---|--------------|-------------|-------------|
| J1 |             |             |             | H | -8.23566500  | -1.31073300 | -2.03159400 |
| C  | 2.47745300  | 1.77122700  | -0.56199000 | C | -9.94958200  | 0.44676300  | 0.33276100  |
| C  | 1.11423500  | 1.87057700  | 0.16589400  | H | -9.02471000  | 1.54497600  | 1.93463500  |
| C  | 0.17453700  | 0.75440100  | -0.30653500 | H | -10.56002900 | -0.72443600 | -1.37118500 |
| C  | 1.96694800  | -0.67551900 | -1.02440200 | H | -10.96120300 | 0.70238400  | 0.62876500  |
| C  | 3.04368700  | 0.33886600  | -0.60891900 | H | 3.44441800   | 0.05712900  | 0.36473300  |
| H  | 1.27582000  | 1.74499300  | 1.24217200  | N | -4.28123700  | -2.80798600 | -0.38536200 |
| H  | 2.33153100  | 2.09673500  | -1.60206700 | H | -4.30143500  | -3.40504500 | -1.19521300 |
| H  | 1.68697400  | -0.49451500 | -2.07254200 | C | -4.69017600  | -4.87355300 | 0.85319900  |
| H  | -0.09361400 | 0.90987400  | -1.36420800 | H | -3.85389300  | -5.38543400 | 1.33484600  |
| O  | 0.80324400  | -0.51373600 | -0.18491500 | H | -5.57875700  | -5.06145000 | 1.45820200  |
| O  | 3.45951300  | 2.59646500  | 0.05014300  | H | -4.83939800  | -5.30233300 | -0.13982800 |
| C  | 2.37243400  | -2.13691800 | -0.88184000 | N | 0.41961200   | 3.14695000  | -0.07644700 |
| H  | 3.26823700  | -2.32400600 | -1.46751600 | H | -0.51865700  | 3.09834200  | -0.45999700 |
| H  | 1.56164700  | -2.77013300 | -1.26362300 | C | -0.16377400  | 5.49137700  | 0.28272900  |
| H  | 3.03345300  | 3.37339300  | 0.47805300  | H | -0.37792100  | 5.91152600  | 1.26787400  |
| O  | 2.69048300  | -2.49497100 | 0.45843400  | H | 0.32950000   | 6.27448300  | -0.29743100 |
| H  | 1.92339900  | -2.34854300 | 1.02528000  | H | -1.09851400  | 5.21360100  | -0.20375400 |
| C  | -2.49167000 | -1.11112600 | -0.07192200 | C | 0.79909500   | 4.33821100  | 0.45432700  |
| C  | -3.90621100 | -1.41611400 | -0.60196900 | O | 1.87523800   | 4.49648300  | 1.03567000  |
| C  | -2.21205600 | 0.39070300  | -0.14115800 | C | -4.40968200  | -3.38344800 | 0.84682200  |
| H  | -2.41381700 | -1.43018000 | 0.97264700  | O | -4.31020700  | -2.74124100 | 1.88475300  |
| C  | -4.98000300 | -0.44977300 | -0.06394400 | C | 5.37818900   | -0.09846600 | -1.29389200 |
| H  | -3.88009000 | -1.26808400 | -1.68456800 | C | 6.19352400   | 0.88360600  | -0.42621500 |
| C  | -3.33485500 | 1.15933900  | 0.56087600  | H | 5.87240100   | -0.15550500 | -2.27566200 |
| H  | -2.18307000 | 0.70346800  | -1.19014000 | C | 6.54790700   | -2.02388100 | -0.42345900 |
| H  | -5.22238300 | -0.67562000 | 0.97867100  | C | 7.55743200   | 0.25852500  | -0.12240600 |
| H  | -3.44123200 | 0.80624900  | 1.59760800  | H | 6.33122000   | 1.80255100  | -1.01131300 |
| O  | -4.53834400 | 0.90566700  | -0.16611300 | C | 7.39394400   | -1.13563200 | 0.48835000  |
| O  | -6.09925300 | -0.59498600 | -0.88291500 | H | 7.10429300   | -2.19797400 | -1.35845400 |
| O  | -0.97013100 | 0.75248500  | 0.48435800  | H | 8.14229100   | 0.16569600  | -1.04356400 |
| C  | -3.11175400 | 2.66383500  | 0.60201300  | H | 6.89518800   | -1.05451600 | 1.46038100  |
| H  | -4.03771600 | 3.15426000  | 0.91836800  | O | 5.29674400   | -1.38559500 | -0.72396000 |
| H  | -2.33409000 | 2.89269800  | 1.32936600  | O | 8.66574500   | -1.76069600 | 0.63084800  |
| O  | -2.65471000 | 3.20528100  | -0.64065400 | O | 8.32136000   | 1.09415900  | 0.74019300  |
| H  | -3.35749800 | 3.13313800  | -1.29846900 | O | 5.61372300   | 1.18622300  | 0.83012100  |
| O  | -1.59841300 | -1.85826900 | -0.88701500 | C | 6.19460500   | -3.37596300 | 0.19510400  |
| H  | -0.69458600 | -1.70129500 | -0.56868100 | H | 5.70573700   | -3.99455500 | -0.57109200 |
| O  | 4.07137200  | 0.32592300  | -1.61270000 | H | 7.11802700   | -3.87336600 | 0.49449100  |
| C  | -7.34411600 | -0.21279300 | -0.42293400 | O | 5.38618100   | -3.26208900 | 1.34743300  |
| C  | -7.55588100 | 0.59883300  | 0.69123500  | H | 4.51137000   | -2.93086200 | 1.08610300  |
| C  | -8.42717000 | -0.68487700 | -1.16698300 | H | 9.23848700   | -1.13914500 | 1.09970600  |
| C  | -8.86311900 | 0.91596800  | 1.06505200  | H | 7.70080100   | 1.44998200  | 1.39506900  |
| H  | -6.72193600 | 1.00068600  | 1.25162500  | H | 4.88124500   | 1.81882300  | 0.69144600  |
| C  | -9.72307600 | -0.35230600 | -0.78911100 |   |              |             |             |

|    |             |             |             |   |              |             |             |
|----|-------------|-------------|-------------|---|--------------|-------------|-------------|
| J2 |             |             |             | H | -8.36474100  | -1.13659200 | -1.53415100 |
| C  | 2.58821100  | 2.01442500  | -0.39547300 | C | -9.69707100  | -0.11834000 | 1.43335400  |
| C  | 1.19293100  | 1.99894300  | 0.26630100  | H | -8.54506700  | 0.65927700  | 3.07530200  |
| C  | 0.23075400  | 1.00645200  | -0.39598800 | H | -10.55451100 | -0.91545100 | -0.37707500 |
| C  | 2.09878500  | -0.29905100 | -1.25622000 | H | -10.64869300 | -0.02282900 | 1.94507400  |
| C  | 3.14454900  | 0.59474300  | -0.56217900 | H | 3.40215600   | 0.15481400  | 0.40133000  |
| H  | 1.31305400  | 1.66693500  | 1.30160200  | N | -4.09798500  | -2.56783300 | -1.07281000 |
| H  | 2.49435700  | 2.45315600  | -1.39296100 | H | -4.17540300  | -2.90809300 | -2.01664700 |
| H  | 1.91619500  | 0.08775000  | -2.26883900 | C | -4.22781400  | -4.93107900 | -0.47659000 |
| H  | -0.05376900 | 1.33565100  | -1.39800200 | H | -3.31200800  | -5.48432400 | -0.25606100 |
| O  | 0.87568100  | -0.28120700 | -0.49657700 | H | -5.02489500  | -5.36543600 | 0.12927400  |
| O  | 3.43482500  | 2.86667100  | 0.36042900  | H | -4.47259800  | -5.06386600 | -1.53248000 |
| C  | 2.47041700  | -1.77345000 | -1.36225300 | N | 0.61238000   | 3.33710000  | 0.32525300  |
| H  | 3.42643500  | -1.88246100 | -1.86589100 | H | 0.72103400   | 3.83287700  | 1.19453300  |
| H  | 1.70105800  | -2.29124000 | -1.94774500 | C | -0.29810900  | 5.44858800  | -0.48916900 |
| H  | 4.10367400  | 2.33433000  | 0.82506100  | H | -0.00223200  | 6.11622200  | -1.29809400 |
| O  | 2.61026300  | -2.39764800 | -0.08533900 | H | -1.39015100  | 5.39277100  | -0.47332100 |
| H  | 1.79404300  | -2.26752800 | 0.41420900  | H | 0.04295200   | 5.86163900  | 0.46335600  |
| C  | -2.37923100 | -0.87403900 | -0.47129300 | C | 0.23620500   | 4.06006500  | -0.77518300 |
| C  | -3.82734800 | -1.14324100 | -0.91328200 | O | 0.27197700   | 3.59860100  | -1.90842800 |
| C  | -2.15536400 | 0.61832700  | -0.20116500 | C | -4.03411900  | -3.48353300 | -0.06384400 |
| H  | -2.17993500 | -1.41822800 | 0.45855600  | O | -3.84114000  | -3.16968400 | 1.10420900  |
| C  | -4.84574000 | -0.46298400 | 0.01733600  | C | 5.53436500   | 0.15126900  | -0.97915400 |
| H  | -3.96304800 | -0.69173200 | -1.89957400 | C | 6.24377400   | 0.92502600  | 0.15221500  |
| C  | -3.22556500 | 1.13928400  | 0.76571400  | H | 6.18599600   | 0.23238900  | -1.86172700 |
| H  | -2.20915800 | 1.18419600  | -1.13682700 | C | 6.49918500   | -1.95678800 | -0.28198300 |
| H  | -4.87850400 | -0.95781800 | 0.99302400  | C | 7.48578300   | 0.15398200  | 0.60666800  |
| H  | -3.14156400 | 0.59953500  | 1.72123400  | H | 6.54291000   | 1.90005400  | -0.25099300 |
| O  | -4.51377700 | 0.91113600  | 0.18428800  | C | 7.13264500   | -1.28984000 | 0.94424600  |
| O  | -6.08933900 | -0.52770400 | -0.61603500 | H | 7.22953800   | -1.96671500 | -1.10733100 |
| O  | -0.88256200 | 0.85055200  | 0.42248600  | H | 8.23528700   | 0.15593300  | -0.19709600 |
| C  | -3.14401700 | 2.63334200  | 1.05086200  | H | 6.41019200   | -1.31313700 | 1.76430800  |
| H  | -3.91039300 | 2.88779500  | 1.79434200  | O | 5.33817900   | -1.21411600 | -0.66272400 |
| H  | -2.16449200 | 2.86892300  | 1.46499200  | O | 8.35757300   | -1.91333400 | 1.34368000  |
| O  | -3.29123700 | 3.42758000  | -0.11633100 | O | 7.99819900   | 0.84568200  | 1.74205900  |
| H  | -4.13973700 | 3.21113700  | -0.52445800 | O | 5.38449200   | 1.12633200  | 1.27567700  |
| O  | -1.54342200 | -1.36309800 | -1.51276400 | C | 6.01557400   | -3.38430100 | -0.03235500 |
| H  | -0.62110200 | -1.26126600 | -1.22531000 | H | 5.60993300   | -3.78167600 | -0.97185200 |
| O  | 4.31634400  | 0.68316300  | -1.40506400 | H | 6.86525700   | -4.01434900 | 0.24459000  |
| C  | -7.24382100 | -0.36609600 | 0.12034100  | O | 5.07103000   | -3.46451400 | 1.01220200  |
| C  | -7.28636100 | 0.14850600  | 1.41634200  | H | 4.23197500   | -3.07448900 | 0.70568900  |
| C  | -8.42350000 | -0.74463500 | -0.52474900 | H | 8.16260600   | -2.67377100 | 1.90307300  |
| C  | -8.51683900 | 0.26073600  | 2.06608200  | H | 8.65720400   | 0.27462000  | 2.15989900  |
| H  | -6.38283300 | 0.48163000  | 1.90950100  | H | 5.95809000   | 1.33616500  | 2.02911300  |
| C  | -9.64270300 | -0.61781000 | 0.13093900  |   |              |             |             |

|    |             |             |             |   |             |             |             |
|----|-------------|-------------|-------------|---|-------------|-------------|-------------|
| K1 |             |             |             | H | 8.66379200  | -1.20441400 | 1.22671000  |
| C  | -2.57441700 | 1.12165600  | -0.05161500 | C | 9.93986600  | 1.40701300  | -0.55344400 |
| C  | -1.09069100 | 1.56905200  | -0.28443700 | H | 8.75024500  | 2.82998200  | -1.64273900 |
| C  | -0.09292200 | 0.41820500  | -0.11666300 | H | 10.83735200 | -0.15028200 | 0.63696600  |
| C  | -1.68691000 | -1.27988500 | -0.28852300 | H | 10.88473100 | 1.87062300  | -0.81480400 |
| C  | -2.88439400 | -0.34291500 | -0.46451300 | H | -3.20382500 | -0.33248900 | -1.51170600 |
| H  | -1.01503900 | 1.90698500  | -1.32342000 | N | 4.76203200  | -2.57611100 | -0.38835800 |
| H  | -2.77986800 | 1.19604100  | 1.02544200  | H | 5.59618900  | -2.48277600 | -0.94836900 |
| H  | -1.51438800 | -1.44123600 | 0.78600700  | C | 5.35936300  | -4.94978200 | -0.33919100 |
| H  | -0.00147400 | 0.12719400  | 0.94208800  | H | 5.93525800  | -5.32227500 | 0.51146800  |
| O  | -0.52968000 | -0.67904800 | -0.86638400 | H | 4.71940900  | -5.76469000 | -0.68026300 |
| O  | -3.44582300 | 1.96574700  | -0.78607800 | H | 6.04989100  | -4.67762600 | -1.13957200 |
| C  | -1.80596200 | -2.64083300 | -0.95791600 | N | -0.66820800 | 2.65541300  | 0.61415300  |
| H  | -1.89822800 | -2.49563500 | -2.04459600 | H | 0.20567700  | 2.52588700  | 1.10908200  |
| H  | -2.69615700 | -3.16187100 | -0.60182000 | C | -0.47018100 | 4.93156500  | 1.47263700  |
| H  | -3.15385400 | 2.89049900  | -0.64671800 | H | -0.28082600 | 5.83287000  | 0.88704900  |
| O  | -0.69145500 | -3.45362700 | -0.64457700 | H | -1.14751800 | 5.21195700  | 2.28323600  |
| H  | 0.11218100  | -2.90627700 | -0.65815500 | H | 0.46691200  | 4.57069000  | 1.89794100  |
| C  | 2.76532500  | -1.05458000 | -0.34889000 | C | -1.16721900 | 3.91968400  | 0.58759400  |
| C  | 4.19474800  | -1.34679500 | 0.17300400  | O | -2.14307000 | 4.23975700  | -0.09048000 |
| C  | 2.32351400  | 0.35940100  | 0.06580200  | C | 4.48881300  | -3.80714300 | 0.13009200  |
| H  | 2.76843200  | -1.10912000 | -1.44643600 | O | 3.57662400  | -3.98022900 | 0.93469800  |
| C  | 5.14705700  | -0.18074400 | -0.12489600 | C | -5.21232400 | -0.98836100 | -0.19158600 |
| H  | 4.15138500  | -1.45555800 | 1.26209400  | C | -6.03832500 | -1.93909200 | 0.68789700  |
| C  | 3.39889800  | 1.40429700  | -0.24990200 | H | -5.17059200 | -1.38765000 | -1.22078400 |
| H  | 2.14625800  | 0.35481200  | 1.14632800  | C | -7.07926300 | 0.36827200  | -0.76340100 |
| H  | 5.30020900  | -0.07087600 | -1.21257600 | C | -7.51507200 | -1.86563700 | 0.28356800  |
| H  | 3.55451400  | 1.45220100  | -1.33895400 | H | -5.67003000 | -2.96470900 | 0.54887200  |
| O  | 4.62366000  | 1.02605300  | 0.38878900  | C | -8.01699500 | -0.41850700 | 0.15021300  |
| O  | 6.36005800  | -0.45518000 | 0.50417800  | H | -7.07915000 | -0.07976600 | -1.76896300 |
| O  | 1.15422400  | 0.82450600  | -0.60494800 | H | -7.64319800 | -2.35239200 | -0.68897000 |
| C  | 3.02906100  | 2.80457000  | 0.22612300  | H | -8.01568700 | 0.05241700  | 1.14235900  |
| H  | 3.91152400  | 3.44909900  | 0.15430400  | O | -5.76179600 | 0.29895700  | -0.20759200 |
| H  | 2.25440500  | 3.20631600  | -0.42464900 | O | -9.32454800 | -0.40151900 | -0.40590700 |
| O  | 2.48480300  | 2.83574500  | 1.54492800  | O | -8.33792000 | -2.59848300 | 1.18651700  |
| H  | 3.17715600  | 2.62921100  | 2.18478900  | O | -5.97170800 | -1.58409900 | 2.06393800  |
| O  | 1.83190000  | -1.99635400 | 0.16114600  | C | -7.36264900 | 1.85916800  | -0.89047600 |
| H  | 2.30167100  | -2.74893800 | 0.57452500  | H | -8.32360200 | 2.01803400  | -1.38045900 |
| O  | -3.92764700 | -0.90926600 | 0.35314800  | H | -7.40975900 | 2.30062500  | 0.11576800  |
| C  | 7.50759500  | 0.21827600  | 0.11773400  | O | -6.37144100 | 2.48822300  | -1.67968900 |
| C  | 7.51872400  | 1.35928000  | -0.68340500 | H | -5.49808100 | 2.25028600  | -1.32334900 |
| C  | 8.70198700  | -0.32327200 | 0.59581200  | H | -9.86230600 | -1.02961700 | 0.09524500  |
| C  | 8.74286200  | 1.94156900  | -1.01961000 | H | -8.02515900 | -2.41094800 | 2.08341000  |
| H  | 6.59581300  | 1.81462500  | -1.01728300 | H | -5.05545300 | -1.37578700 | 2.28724600  |
| C  | 9.91200500  | 0.27387200  | 0.26125800  |   |             |             |             |

|    |             |             |             |   |             |             |             |
|----|-------------|-------------|-------------|---|-------------|-------------|-------------|
| K2 |             |             |             | H | 8.31593300  | -1.29426200 | 2.09896300  |
| C  | -2.58486500 | 1.12865000  | -0.09390000 | C | 10.01581000 | 0.98756600  | 0.22245600  |
| C  | -1.12139800 | 1.54061000  | -0.46067300 | H | 9.09396400  | 2.32837100  | -1.18465200 |
| C  | -0.11428700 | 0.43505900  | -0.13205800 | H | 10.62492600 | -0.46078000 | 1.69851400  |
| C  | -1.69433800 | -1.29396500 | -0.05696700 | H | 11.02081800 | 1.35241100  | 0.03990700  |
| C  | -2.89830300 | -0.37538600 | -0.30308000 | H | -3.25807800 | -0.49254600 | -1.33019600 |
| H  | -1.08702700 | 1.70306400  | -1.54355500 | N | 4.57237300  | -2.69846700 | 0.07003100  |
| H  | -2.73178700 | 1.33818100  | 0.97543100  | H | 4.58876500  | -3.39528600 | 0.79570400  |
| H  | -1.50892500 | -1.35359400 | 1.02564500  | C | 5.27915200  | -4.53235500 | -1.37893600 |
| H  | -0.02799600 | 0.30258500  | 0.95838700  | H | 4.60811400  | -5.01622200 | -2.09144400 |
| O  | -0.54016600 | -0.78089100 | -0.70817700 | H | 6.28140900  | -4.55197700 | -1.81195300 |
| O  | -3.50849700 | 1.85623200  | -0.88050600 | H | 5.28555400  | -5.10749200 | -0.45076800 |
| C  | -1.88795200 | -2.70303800 | -0.58323800 | N | -0.66123500 | 2.75196700  | 0.23943900  |
| H  | -1.97053700 | -2.67623100 | -1.67641800 | H | 0.28259000  | 2.72129800  | 0.60977600  |
| H  | -2.80231200 | -3.13250100 | -0.16159800 | C | -0.45735300 | 5.11749300  | 0.79337400  |
| H  | -3.25856800 | 2.80354600  | -0.82291700 | H | -0.35915800 | 5.93216900  | 0.07345000  |
| O  | -0.74109700 | -3.45384700 | -0.17949000 | H | -1.04842700 | 5.49848000  | 1.62985900  |
| H  | -0.75291100 | -4.32297900 | -0.59479600 | H | 0.53068800  | 4.82869800  | 1.15210300  |
| C  | 2.67294700  | -1.10741800 | -0.14556900 | C | -1.22105600 | 3.98677100  | 0.13684500  |
| C  | 4.08014800  | -1.37592600 | 0.43672700  | O | -2.29420700 | 4.19965800  | -0.42860700 |
| C  | 2.28940100  | 0.36418500  | 0.05507200  | C | 4.84995900  | -3.08693300 | -1.20784400 |
| H  | 2.66692500  | -1.32900800 | -1.21640200 | O | 4.77265300  | -2.32203700 | -2.16143300 |
| C  | 5.11479900  | -0.27960400 | 0.12418200  | C | -5.19322300 | -1.06001500 | 0.10444000  |
| H  | 3.97017000  | -1.38031200 | 1.52411200  | C | -6.00852900 | -1.78396300 | 1.18471100  |
| C  | 3.41691300  | 1.29273200  | -0.40328500 | H | -5.13437700 | -1.69862400 | -0.79627900 |
| H  | 2.11664600  | 0.53574500  | 1.12326700  | C | -7.07640400 | 0.08307200  | -0.79180100 |
| H  | 5.44067300  | -0.32676200 | -0.91954600 | C | -7.47910400 | -1.85084600 | 0.75721400  |
| H  | 3.64361800  | 1.11193300  | -1.46486100 | H | -5.61601700 | -2.80299800 | 1.30850500  |
| O  | 4.56873500  | 1.01040600  | 0.39302900  | C | -8.01282200 | -0.49350700 | 0.26934500  |
| O  | 6.19066700  | -0.48195000 | 0.99169400  | H | -7.05665400 | -0.58128000 | -1.66933400 |
| O  | 1.12259700  | 0.76740900  | -0.67271600 | H | -7.57899400 | -2.56320200 | -0.06850200 |
| C  | 3.07715200  | 2.76956800  | -0.24422900 | H | -8.04976200 | 0.20107500  | 1.11942400  |
| H  | 3.98615600  | 3.36273600  | -0.38779000 | O | -5.76372900 | 0.17075600  | -0.22719300 |
| H  | 2.35332700  | 3.05657000  | -1.00531900 | O | -9.30515200 | -0.65040800 | -0.29954200 |
| O  | 2.46593700  | 3.08166500  | 1.01030400  | O | -8.29925500 | -2.36444300 | 1.80205100  |
| H  | 3.10720000  | 2.94376900  | 1.71858000  | O | -5.97102300 | -1.09814500 | 2.42960300  |
| O  | 1.80859900  | -1.98621400 | 0.56176200  | C | -7.38644400 | 1.50228000  | -1.25323000 |
| H  | 1.03065900  | -2.22521800 | 0.03398900  | H | -8.33595800 | 1.52276800  | -1.78848600 |
| O  | -3.91272300 | -0.82398600 | 0.61910000  | H | -7.47140600 | 2.15393700  | -0.37179700 |
| C  | 7.42757900  | 0.04866900  | 0.68655000  | O | -6.38731300 | 1.96848400  | -2.13916600 |
| C  | 7.63586300  | 1.07490500  | -0.23492100 | H | -5.52386600 | 1.88021000  | -1.70101700 |
| C  | 8.50507300  | -0.50024300 | 1.38500700  | H | -9.84585300 | -1.14217700 | 0.33332500  |
| C  | 8.93482100  | 1.53135100  | -0.46528400 | H | -8.01696100 | -1.94503700 | 2.62781700  |
| H  | 6.80119100  | 1.53252800  | -0.74940100 | H | -5.07369100 | -0.77556800 | 2.58345600  |
| C  | 9.79208900  | -0.02838300 | 1.15322800  |   |             |             |             |

|    |             |             |             |   |              |             |             |
|----|-------------|-------------|-------------|---|--------------|-------------|-------------|
| K3 |             |             |             | H | -8.01715300  | -1.69748700 | -2.24410100 |
| C  | 2.62237200  | 1.04201600  | 0.24809600  | C | -9.82374500  | 1.05848200  | -1.37349400 |
| C  | 1.14989100  | 1.44552300  | 0.61035200  | H | -9.04778300  | 2.70505200  | -0.22723900 |
| C  | 0.10311600  | 0.42342100  | 0.17207500  | H | -10.28912800 | -0.71913000 | -2.50090100 |
| C  | 1.67014100  | -1.27759600 | -0.29645100 | H | -10.81414700 | 1.48822300  | -1.47755500 |
| C  | 2.89532100  | -0.48150000 | 0.16440500  | H | 3.21714800   | -0.82304600 | 1.15345300  |
| H  | 1.09683700  | 1.51527100  | 1.70126300  | N | -4.81332800  | -2.57229700 | 0.80998800  |
| H  | 2.83790600  | 1.44933300  | -0.74924100 | H | -4.80260200  | -3.46101000 | 0.33778600  |
| H  | 1.47053200  | -1.04749600 | -1.35266000 | C | -5.83287100  | -3.82784600 | 2.63988800  |
| H  | -0.06062500 | 0.47828600  | -0.91565000 | H | -5.18974300  | -4.16452100 | 3.45650200  |
| O  | 0.53937000  | -0.88585800 | 0.49070700  | H | -6.82277200  | -3.64251700 | 3.05961500  |
| O  | 3.50431200  | 1.59076000  | 1.21248100  | H | -5.90403000  | -4.62618400 | 1.89836200  |
| C  | 1.79404500  | -2.78929700 | -0.16467000 | N | 0.76182600   | 2.73365200  | 0.02284300  |
| H  | 1.83525800  | -3.05955100 | 0.89967200  | H | -0.03978900  | 2.74302900  | -0.59840800 |
| H  | 2.71668200  | -3.12193300 | -0.63953300 | C | 0.65675500   | 5.16102800  | -0.19962800 |
| H  | 3.24231000  | 2.52339200  | 1.35575300  | H | 0.27148300   | 5.78602200  | 0.60927600  |
| O  | 0.74386900  | -3.47056000 | -0.83101000 | H | 1.42938700   | 5.73833500  | -0.71107100 |
| H  | -0.10836700 | -3.23430600 | -0.43951800 | H | -0.15162800  | 4.94225900  | -0.89889000 |
| C  | -2.83897400 | -1.05707500 | 0.83762100  | C | 1.28907700   | 3.92530700  | 0.40404200  |
| C  | -4.15107600 | -1.46039100 | 0.13939300  | O | 2.23167600   | 4.01257700  | 1.19093500  |
| C  | -2.28653300 | 0.21394900  | 0.19235700  | C | -5.28206900  | -2.52557400 | 2.09247000  |
| H  | -3.03351200 | -0.85287500 | 1.89555300  | O | -5.26162700  | -1.50051100 | 2.76169100  |
| C  | -5.11811400 | -0.27160300 | -0.06697300 | C | 5.19622400   | -1.08437100 | -0.33028800 |
| H  | -3.88833400 | -1.81510200 | -0.86052300 | C | 6.02073300   | -1.62006900 | -1.51036000 |
| C  | -3.35991700 | 1.30383400  | 0.26152500  | H | 5.13364000   | -1.86153500 | 0.45305000  |
| H  | -2.06366600 | 0.02092000  | -0.86155900 | C | 7.06957700   | -0.09878600 | 0.75165500  |
| H  | -5.61149300 | -0.00545800 | 0.87248900  | C | 7.49086400   | -1.74584100 | -1.09367600 |
| H  | -3.72093400 | 1.41061500  | 1.29577100  | H | 5.63479300   | -2.60732600 | -1.79928000 |
| O  | -4.43257400 | 0.87410100  | -0.58034300 | C | 8.01088800   | -0.48133500 | -0.38901300 |
| O  | -6.04857600 | -0.67714300 | -1.02346100 | H | 7.04859200   | -0.90363300 | 1.50198700  |
| O  | -1.09179400 | 0.66748800  | 0.84583800  | H | 7.59359700   | -2.58222100 | -0.39444600 |
| C  | -2.88358200 | 2.67555500  | -0.19298300 | H | 8.03592300   | 0.34430800  | -1.11283400 |
| H  | -3.75232300 | 3.32371900  | -0.34549000 | O | 5.75863600   | 0.07820400  | 0.20279200  |
| H  | -2.26562700 | 3.11036800  | 0.59182700  | O | 9.30644600   | -0.71417800 | 0.14465200  |
| O  | -2.05956400 | 2.65151500  | -1.36223400 | O | 8.31899200   | -2.07540400 | -2.20398400 |
| H  | -2.59855600 | 2.44533100  | -2.13546700 | O | 5.98565300   | -0.74046400 | -2.62733400 |
| O  | -1.94762800 | -2.16027600 | 0.71707600  | C | 7.37331400   | 1.22112200  | 1.44969800  |
| H  | -1.08475000 | -1.87134200 | 1.05379300  | H | 8.32311500   | 1.15319200  | 1.98045700  |
| O  | 3.91770500  | -0.77072300 | -0.80835500 | H | 7.45565400   | 2.01478000  | 0.69301100  |
| C  | -7.27509000 | -0.04623100 | -1.09916800 | O | 6.37290200   | 1.52479300  | 2.40226100  |
| C  | -7.55288700 | 1.19822000  | -0.53433600 | H | 5.50822600   | 1.49789600  | 1.95829100  |
| C  | -8.26012300 | -0.73359200 | -1.81079800 | H | 9.84783000   | -1.09799900 | -0.55848200 |
| C  | -8.83322500 | 1.73784100  | -0.67044100 | H | 8.03269300   | -1.53372600 | -2.95366000 |
| H  | -6.78324400 | 1.75500900  | -0.01610200 | H | 5.07804000   | -0.43895900 | -2.76052200 |
| C  | -9.52766400 | -0.17886100 | -1.94767900 |   |              |             |             |



|    |             |             |             |   |              |             |             |
|----|-------------|-------------|-------------|---|--------------|-------------|-------------|
| K4 |             |             |             | H | -8.42760800  | -1.79950900 | -1.00244700 |
| C  | 2.55215500  | 1.33321100  | -0.04648300 | C | -9.69063000  | -0.14725900 | 1.69689300  |
| C  | 1.12317600  | 1.96737200  | 0.06171300  | H | -8.57065600  | 1.23382600  | 2.90738900  |
| C  | 0.02817600  | 0.98929200  | -0.37033500 | H | -10.53301400 | -1.55171600 | 0.29493200  |
| C  | 1.32994500  | -0.93096800 | -0.13155200 | H | -10.60566400 | -0.03670600 | 2.26847500  |
| C  | 2.61214500  | -0.18965700 | 0.26165300  | H | 2.80227100   | -0.30036800 | 1.33406900  |
| H  | 0.94929700  | 2.20407400  | 1.11681400  | N | -4.09076900  | -2.46284400 | -0.81540200 |
| H  | 2.89514500  | 1.45950700  | -1.08288000 | H | -4.80821800  | -2.84359500 | -1.41121500 |
| H  | 1.28892200  | -0.99025600 | -1.22945600 | C | -3.90889400  | -4.78654900 | -0.12445300 |
| H  | 0.08234200  | 0.77570400  | -1.44777800 | H | -3.05082800  | -5.36947800 | -0.46740000 |
| O  | 0.20360600  | -0.21119100 | 0.34626000  | H | -4.19289900  | -5.17089200 | 0.85659500  |
| O  | 3.43309500  | 1.97850900  | 0.85518700  | H | -4.73580500  | -4.93993600 | -0.82034400 |
| C  | 1.19572800  | -2.34705500 | 0.41131500  | N | 0.95926400   | 3.18173200  | -0.75255900 |
| H  | 1.12926400  | -2.32347700 | 1.50370200  | H | 0.07920400   | 3.24454700  | -1.24414100 |
| H  | 2.06770300  | -2.93883700 | 0.12559600  | C | 1.12715600   | 5.53445200  | -1.37881300 |
| H  | 3.33212700  | 2.94457500  | 0.72570300  | H | 0.80660000   | 6.30491300  | -0.67371000 |
| O  | 0.03652700  | -2.96227900 | -0.15499800 | H | 1.94732300   | 5.95350300  | -1.96407000 |
| H  | -0.67256400 | -3.06563700 | 0.49985700  | H | 0.29610100   | 5.29902600  | -2.04581100 |
| C  | -2.48001400 | -0.53712000 | -0.64056400 | C | 1.64455000   | 4.34630600  | -0.59499000 |
| C  | -3.91582600 | -1.01406700 | -0.93543600 | O | 2.63503700   | 4.45227800  | 0.12566300  |
| C  | -2.39701300 | 0.99744100  | -0.67619700 | C | -3.48012500  | -3.33879100 | 0.02537900  |
| H  | -2.18164500 | -0.86916300 | 0.35090100  | O | -2.62230300  | -3.02343200 | 0.85065500  |
| C  | -4.95563900 | -0.25641500 | -0.10137700 | C | 4.83912300   | -1.16466200 | 0.19775300  |
| H  | -4.12894200 | -0.77036800 | -1.98097600 | C | 5.65529700   | -2.10357300 | -0.70280300 |
| C  | -3.54310400 | 1.64902100  | 0.11384100  | H | 4.59966600   | -1.68425000 | 1.14332600  |
| H  | -2.42787400 | 1.33367500  | -1.71838700 | C | 6.75947200   | -0.17645300 | 1.19169900  |
| H  | -4.85318200 | -0.48323400 | 0.97018000  | C | 7.05454100   | -2.30022400 | -0.10785200 |
| H  | -3.39578100 | 1.42720400  | 1.18144000  | H | 5.14316500   | -3.07367800 | -0.76566800 |
| O  | -4.80728700 | 1.13600800  | -0.31697100 | C | 7.71166800   | -0.97126200 | 0.29969200  |
| O  | -6.21879500 | -0.64105400 | -0.56066200 | H | 6.55784200   | -0.74086500 | 2.11503100  |
| O  | -1.21402100 | 1.53257900  | -0.04560300 | H | 6.97636500   | -2.92142900 | 0.79052900  |
| C  | -3.61475700 | 3.16230700  | -0.05860400 | H | 7.91650300   | -0.38338300 | -0.60511700 |
| H  | -4.44110700 | 3.54527900  | 0.55263000  | O | 5.53662200   | 0.01548000  | 0.47185400  |
| H  | -2.68815700 | 3.61223700  | 0.29560600  | O | 8.91404700   | -1.21706100 | 1.01533100  |
| O  | -3.76340200 | 3.55560000  | -1.41521200 | O | 7.89924700   | -3.02358700 | -0.99755700 |
| H  | -4.60724900 | 3.21709700  | -1.74061000 | O | 5.83526300   | -1.56673900 | -2.00749700 |
| O  | -1.62251000 | -1.08938100 | -1.62847700 | C | 7.20922700   | 1.23091800  | 1.56271700  |
| H  | -1.05282300 | -1.76620600 | -1.21887300 | H | 8.09825400   | 1.18627000  | 2.19214400  |
| O  | 3.66499200  | -0.83083300 | -0.48596400 | H | 7.46235000   | 1.77927900  | 0.64381900  |
| C  | -7.33312100 | -0.42950200 | 0.22946300  | O | 6.20058400   | 1.89926300  | 2.29566400  |
| C  | -7.36568800 | 0.43397700  | 1.32412500  | H | 5.37235100   | 1.85547600  | 1.78798200  |
| C  | -8.47547500 | -1.14101800 | -0.14202500 | H | 9.43847100   | -1.84363400 | 0.49841700  |
| C  | -8.54804500 | 0.56160900  | 2.05567100  | H | 7.75280900   | -2.67348800 | -1.88832600 |
| H  | -6.49853400 | 1.02363900  | 1.59073600  | H | 5.00202400   | -1.17843900 | -2.30377800 |
| C  | -9.64879700 | -0.99579500 | 0.58947800  |   |              |             |             |

|    |             |             |             |   |             |             |             |
|----|-------------|-------------|-------------|---|-------------|-------------|-------------|
| K5 |             |             |             | H | 8.63002200  | -1.19587100 | 1.31869300  |
| C  | -2.58229300 | 1.10371800  | -0.12524600 | C | 9.93566400  | 1.45035600  | -0.38705300 |
| C  | -1.09800900 | 1.54968200  | -0.35445300 | H | 8.76595300  | 2.88131600  | -1.48736600 |
| C  | -0.10157800 | 0.39956900  | -0.18332300 | H | 10.81141100 | -0.11866900 | 0.80424000  |
| C  | -1.68639900 | -1.30249400 | -0.36052500 | H | 10.88397000 | 1.92427400  | -0.61549900 |
| C  | -2.89668600 | -0.37325300 | -0.49851300 | H | -3.26479500 | -0.38232000 | -1.53068700 |
| H  | -1.01727300 | 1.88498800  | -1.39375200 | N | 4.77986900  | -2.56862600 | -0.41714600 |
| H  | -2.80298200 | 1.20599400  | 0.94492100  | H | 5.62236900  | -2.46170800 | -0.96193500 |
| H  | -1.50164100 | -1.48066300 | 0.70839000  | C | 5.39309300  | -4.93856000 | -0.39156300 |
| H  | -0.01832000 | 0.10275500  | 0.87436700  | H | 5.95493100  | -5.32015800 | 0.46443400  |
| O  | -0.53573900 | -0.69057800 | -0.94281800 | H | 4.76543900  | -5.75233000 | -0.75735000 |
| O  | -3.44178300 | 1.93888700  | -0.89292400 | H | 6.09713700  | -4.64975900 | -1.17420400 |
| C  | -1.81475000 | -2.65090500 | -1.05200500 | N | -0.68300200 | 2.64219100  | 0.53927100  |
| H  | -1.93196500 | -2.48664600 | -2.13373600 | H | 0.16638100  | 2.50588000  | 1.07327300  |
| H  | -2.69540900 | -3.17974000 | -0.68378700 | C | -0.50328300 | 4.92453600  | 1.38355900  |
| H  | -3.13618300 | 2.86264000  | -0.77892400 | H | -0.30106300 | 5.82452300  | 0.80031900  |
| O  | -0.69067200 | -3.46737700 | -0.78154300 | H | -1.20212200 | 5.20483100  | 2.17581600  |
| H  | 0.10805500  | -2.91336600 | -0.78389100 | H | 0.42301400  | 4.56706500  | 1.83480600  |
| C  | 2.77240600  | -1.06081100 | -0.40033000 | C | -1.17393200 | 3.90699600  | 0.48457800  |
| C  | 4.19164900  | -1.35138700 | 0.14911300  | O | -2.12454800 | 4.22448700  | -0.23100800 |
| C  | 2.31187000  | 0.34384900  | 0.02595300  | C | 4.50547400  | -3.80893500 | 0.07810000  |
| H  | 2.80115200  | -1.09719700 | -1.49841700 | O | 3.58007300  | -4.00040600 | 0.86275600  |
| C  | 5.14308400  | -0.17546300 | -0.11033400 | C | -5.18616100 | -1.00367500 | -0.07713300 |
| H  | 4.12475000  | -1.47683700 | 1.23519400  | C | -6.02629700 | -1.90743600 | 0.83280300  |
| C  | 3.38628300  | 1.39940000  | -0.25578100 | H | -5.21121900 | -1.42642700 | -1.09939700 |
| H  | 2.11578900  | 0.32294000  | 1.10310400  | C | -7.02174800 | 0.37653700  | -0.69230900 |
| H  | 5.32324600  | -0.05172900 | -1.19245500 | C | -7.48533600 | -1.84162500 | 0.35481100  |
| H  | 3.56439300  | 1.46068500  | -1.34072500 | H | -5.66761200 | -2.94124600 | 0.72827700  |
| O  | 4.60060000  | 1.02200600  | 0.40425900  | C | -7.97926000 | -0.39984700 | 0.22025300  |
| O  | 6.34205300  | -0.45078000 | 0.54593600  | H | -7.01942100 | -0.08101500 | -1.69427500 |
| O  | 1.15152900  | 0.80757800  | -0.65924000 | H | -7.56347300 | -2.31782800 | -0.63363100 |
| C  | 2.99858800  | 2.79170400  | 0.22836500  | H | -7.99003600 | 0.06712700  | 1.21138800  |
| H  | 3.87701500  | 3.44383300  | 0.17601600  | O | -5.71903400 | 0.30095900  | -0.12029300 |
| H  | 2.23014900  | 3.19341300  | -0.42970300 | O | -9.31283200 | -0.49991700 | -0.29921600 |
| O  | 2.43502900  | 2.80575800  | 1.53915400  | O | -8.26320600 | -2.57182500 | 1.29795400  |
| H  | 3.11696300  | 2.58640500  | 2.18593400  | O | -5.91504500 | -1.47939400 | 2.17489000  |
| O  | 1.83407900  | -2.01594500 | 0.07210900  | C | -7.28325900 | 1.87111300  | -0.83881800 |
| H  | 2.29710200  | -2.77130600 | 0.48686500  | H | -8.24226100 | 2.04717700  | -1.33395000 |
| O  | -3.88160900 | -0.93598600 | 0.38399000  | H | -7.32006700 | 2.32600400  | 0.16326100  |
| C  | 7.49418600  | 0.23536900  | 0.19988100  | O | -6.29243500 | 2.47491400  | -1.63977900 |
| C  | 7.51926400  | 1.38816300  | -0.58405000 | H | -5.41516600 | 2.21505100  | -1.30154400 |
| C  | 8.67925600  | -0.30523900 | 0.70204400  | H | -9.79159500 | 0.32051900  | -0.13824300 |
| C  | 8.74795000  | 1.98364000  | -0.87783900 | H | -9.19439300 | -2.41957100 | 1.08920800  |
| H  | 6.60252700  | 1.84217100  | -0.93615500 | H | -6.60513000 | -1.93855800 | 2.67344300  |
| C  | 9.89365400  | 0.30488700  | 0.40964700  |   |             |             |             |

|    |             |             |             |   |              |             |             |
|----|-------------|-------------|-------------|---|--------------|-------------|-------------|
| K6 |             |             |             | H | -8.21631400  | -0.83066000 | -2.48131800 |
| C  | 2.61615300  | 0.74408300  | 0.29628300  | C | -9.85163300  | 1.48263000  | -0.58587500 |
| C  | 1.20716600  | 1.17276100  | 0.77863700  | H | -8.92878900  | 2.64452800  | 0.97166500  |
| C  | 0.15392300  | 0.16639400  | 0.30636800  | H | -10.46701700 | 0.18776300  | -2.19608400 |
| C  | 1.69369300  | -1.62034100 | 0.19382400  | H | -10.83193400 | 1.92753100  | -0.45321600 |
| C  | 2.88739400  | -0.74831900 | 0.61076500  | H | 3.06091700   | -0.84156900 | 1.69180000  |
| H  | 1.19360200  | 1.16848300  | 1.87416400  | N | -4.72573200  | -2.65445300 | -0.25324800 |
| H  | 2.67060400  | 0.87016800  | -0.79267400 | H | -4.70661700  | -3.33264200 | -0.99644500 |
| H  | 1.60282400  | -1.59191200 | -0.90131900 | C | -5.61575800  | -4.49661400 | 1.07922800  |
| H  | 0.10966900  | 0.14096800  | -0.79475200 | H | -4.98224200  | -5.05045900 | 1.77541800  |
| O  | 0.49666500  | -1.11880500 | 0.78282200  | H | -6.62458900  | -4.48509000 | 1.49625200  |
| O  | 3.62549900  | 1.55133000  | 0.89531300  | H | -5.63480900  | -5.02353500 | 0.12304500  |
| C  | 1.81089300  | -3.06992300 | 0.62149000  | N | 0.83247200   | 2.51395300  | 0.31869000  |
| H  | 1.85602500  | -3.12916300 | 1.71656700  | H | 0.02567800   | 2.59422800  | -0.29056900 |
| H  | 2.72166000  | -3.49769100 | 0.19580600  | C | 0.59934500   | 4.93694000  | 0.54673200  |
| H  | 3.21288600  | 2.26521100  | 1.42519000  | H | 0.26335900   | 5.46977300  | 1.43823300  |
| O  | 0.64488700  | -3.73512000 | 0.12833700  | H | 1.36144500   | 5.55766300  | 0.06914400  |
| H  | 0.66120200  | -4.66138600 | 0.39190300  | H | -0.23861500  | 4.80714800  | -0.13885800 |
| C  | -2.73660700 | -1.21603700 | 0.14306800  | C | 1.23718500   | 3.63489000  | 0.97360500  |
| C  | -4.11850900 | -1.35876400 | -0.53443600 | O | 2.09817700   | 3.59968000  | 1.85495600  |
| C  | -2.23338900 | 0.22781700  | 0.01876900  | C | -5.10889700  | -3.06917700 | 0.98855500  |
| H  | -2.81729200 | -1.46740900 | 1.20495900  | O | -5.06164600  | -2.34073500 | 1.97222500  |
| C  | -5.08661100 | -0.19957200 | -0.23766300 | C | 5.27223900   | -0.85851500 | 0.16675100  |
| H  | -3.94118900 | -1.33110700 | -1.61255900 | C | 6.29140300   | -1.97375400 | -0.10502100 |
| C  | -3.31434100 | 1.22441000  | 0.44353600  | H | 5.35724000   | -0.54795800 | 1.22056900  |
| H  | -1.98336600 | 0.41961400  | -1.03029000 | C | 6.78231800   | 0.88081500  | -0.37396900 |
| H  | -5.47394000 | -0.25864100 | 0.78406300  | C | 7.70657800   | -1.39109700 | 0.03056000  |
| H  | -3.61857400 | 1.02689000  | 1.48277200  | H | 6.16207000   | -2.75527700 | 0.65837900  |
| O  | -4.43406400 | 1.05467000  | -0.42718000 | C | 7.88511800   | -0.10541400 | -0.77938000 |
| O  | -6.12309300 | -0.28918100 | -1.17005700 | H | 6.85972800   | 1.08469300  | 0.70543300  |
| O  | -1.08578200 | 0.50818400  | 0.82867800  | H | 7.89538000   | -1.14674600 | 1.08611700  |
| C  | -2.85493100 | 2.67514100  | 0.36501900  | H | 7.79286500   | -0.33334400 | -1.84723300 |
| H  | -3.72538100 | 3.33145900  | 0.46735600  | O | 5.53060400   | 0.25785300  | -0.66032500 |
| H  | -2.17119400 | 2.87630100  | 1.18811000  | O | 9.21074500   | 0.34897600  | -0.47682100 |
| O  | -2.12738100 | 2.98743700  | -0.82613300 | O | 8.61209600   | -2.40624800 | -0.39147300 |
| H  | -2.72249900 | 2.94309200  | -1.58470700 | O | 6.08590300   | -2.51201800 | -1.39552700 |
| O  | -1.90117500 | -2.13987200 | -0.53798100 | C | 6.74227800   | 2.21458200  | -1.10158600 |
| H  | -1.12137500 | -2.37576700 | -0.01012700 | H | 7.69571200   | 2.74033900  | -0.99079100 |
| O  | 3.98698700  | -1.31491800 | -0.10263300 | H | 6.56896800   | 2.03211200  | -2.17284200 |
| C  | -7.32670100 | 0.33653800  | -0.92128700 | O | 5.74179300   | 3.05419700  | -0.56032500 |
| C  | -7.51665200 | 1.32042300  | 0.04924400  | H | 4.99440900   | 2.50727300  | -0.25581800 |
| C  | -8.39055700 | -0.06698000 | -1.73137200 | H | 9.50150200   | 0.98511200  | -1.13937900 |
| C  | -8.78442200 | 1.88109400  | 0.21372900  | H | 9.49293000   | -2.01176500 | -0.44091100 |
| H  | -6.68932200 | 1.66708900  | 0.65430300  | H | 6.87671600   | -3.02514600 | -1.61362600 |
| C  | -9.64521200 | 0.50763400  | -1.56337900 |   |              |             |             |

|    |             |             |             |   |              |             |             |
|----|-------------|-------------|-------------|---|--------------|-------------|-------------|
| K7 |             |             |             | H | -8.01886400  | -1.68607000 | -2.25389500 |
| C  | 2.63108200  | 1.00174200  | 0.29765500  | C | -9.80579700  | 1.09426300  | -1.42077800 |
| C  | 1.15683200  | 1.41571500  | 0.63745500  | H | -9.01993500  | 2.74737400  | -0.29075200 |
| C  | 0.10840200  | 0.39773400  | 0.19715300  | H | -10.28191400 | -0.69222600 | -2.52955500 |
| C  | 1.66372600  | -1.31984000 | -0.23785400 | H | -10.79229800 | 1.53090500  | -1.53309100 |
| C  | 2.89859700  | -0.52456800 | 0.20210000  | H | 3.24040500   | -0.87043800 | 1.18439400  |
| H  | 1.08934100  | 1.49305500  | 1.72698900  | N | -4.83291800  | -2.55618400 | 0.81443300  |
| H  | 2.87467000  | 1.41565700  | -0.68873100 | H | -4.81263600  | -3.45022400 | 0.35268800  |
| H  | 1.46889000  | -1.10864000 | -1.29810000 | C | -5.87208500  | -3.79645200 | 2.64326000  |
| H  | -0.04202200 | 0.43974700  | -0.89286700 | H | -5.23630600  | -4.12695700 | 3.46813200  |
| O  | 0.53097800  | -0.90904600 | 0.53973200  | H | -6.86575200  | -3.60779600 | 3.05246600  |
| O  | 3.49267000  | 1.54333600  | 1.29142300  | H | -5.93657100  | -4.60044800 | 1.90722000  |
| C  | 1.78614900  | -2.82823100 | -0.07607500 | N | 0.78491300   | 2.70401100  | 0.04049200  |
| H  | 1.82978600  | -3.07742400 | 0.99353800  | H | 0.00508200   | 2.71466100  | -0.60765700 |
| H  | 2.70805900  | -3.16720700 | -0.54748700 | C | 0.70494400   | 5.13134400  | -0.18983700 |
| H  | 3.21871000  | 2.47183000  | 1.44070500  | H | 0.30879200   | 5.76624900  | 0.60592800  |
| O  | 0.73576300  | -3.52678700 | -0.72521300 | H | 1.49629300   | 5.69543900  | -0.68734900 |
| H  | -0.11720800 | -3.27315100 | -0.34701800 | H | -0.08928700  | 4.91784900  | -0.90676800 |
| C  | -2.85191700 | -1.04938300 | 0.84992600  | C | 1.30796500   | 3.89165900  | 0.43537000  |
| C  | -4.15878600 | -1.45223500 | 0.14204600  | O | 2.22596200   | 3.97313400  | 1.25245600  |
| C  | -2.28325900 | 0.20881300  | 0.19355600  | C | -5.31593900  | -2.49828500 | 2.09086500  |
| H  | -3.05759600 | -0.82856200 | 1.90258200  | O | -5.30469800  | -1.46767400 | 2.75175800  |
| C  | -5.11605800 | -0.25919200 | -0.08219200 | C | 5.17925900   | -1.06413800 | -0.37196500 |
| H  | -3.88836500 | -1.81610300 | -0.85251700 | C | 6.01809800   | -1.63671600 | -1.52055000 |
| C  | -3.34870900 | 1.30760600  | 0.23771100  | H | 5.17575900   | -1.80160300 | 0.45321000  |
| H  | -2.05093500 | 0.00017800  | -0.85542500 | C | 7.02637400   | -0.00615200 | 0.68456000  |
| H  | -5.61147000 | 0.02177600  | 0.85190000  | C | 7.46946600   | -1.76531900 | -1.03178200 |
| H  | -3.71696300 | 1.43235700  | 1.26747600  | H | 5.63986800   | -2.63920300 | -1.76695700 |
| O  | -4.41915000 | 0.87459200  | -0.60584800 | C | 7.98659300   | -0.46067800 | -0.42145000 |
| O  | -6.04642100 | -0.66819000 | -1.03785000 | H | 6.99797700   | -0.76661800 | 1.48065600  |
| O  | -1.09318500 | 0.66148700  | 0.85397800  | H | 7.52171300   | -2.54317200 | -0.25584400 |
| C  | -2.85762400 | 2.66892000  | -0.23266300 | H | 8.02671600   | 0.30729500  | -1.20208600 |
| H  | -3.72030300 | 3.32124000  | -0.40202900 | O | 5.73142500   | 0.13906800  | 0.10582800  |
| H  | -2.24346800 | 3.10991400  | 0.55166700  | O | 9.30635800   | -0.75934200 | 0.05332000  |
| O  | -2.02300200 | 2.62269000  | -1.39312800 | O | 8.24906800   | -2.15922500 | -2.15555200 |
| H  | -2.55487200 | 2.40472000  | -2.16806200 | O | 5.93697700   | -0.78769300 | -2.64656200 |
| O  | -1.96710800 | -2.15957600 | 0.75570600  | C | 7.31215500   | 1.35178200  | 1.31562500  |
| H  | -1.10000000 | -1.86543100 | 1.07832100  | H | 8.26457600   | 1.33255400  | 1.85223100  |
| O  | 3.88243000  | -0.81770000 | -0.80136500 | H | 7.37662500   | 2.10867300  | 0.51864500  |
| C  | -7.26687100 | -0.02817700 | -1.12529700 | O | 6.31782300   | 1.68351600  | 2.25830400  |
| C  | -7.53658200 | 1.22491900  | -0.57560700 | H | 5.44362400   | 1.58324000  | 1.83808800  |
| C  | -8.25539000 | -0.71532200 | -1.83248800 | H | 9.80527600   | 0.05551900  | 0.17767800  |
| C  | -8.81195600 | 1.77339200  | -0.72217200 | H | 9.17957900   | -2.10809900 | -1.89967200 |
| H  | -6.76412200 | 1.78122100  | -0.06111800 | H | 6.63337500   | -1.06550000 | -3.25791600 |
| C  | -9.51788200 | -0.15188400 | -1.97990600 |   |              |             |             |

|    |             |             |             |   |              |             |             |
|----|-------------|-------------|-------------|---|--------------|-------------|-------------|
| K8 |             |             |             | H | -8.43354800  | -1.79496200 | -0.98468600 |
| C  | 2.55883700  | 1.29784000  | -0.01541100 | C | -9.68205400  | -0.11088100 | 1.70182500  |
| C  | 1.13091600  | 1.93992200  | 0.05244200  | H | -8.55408900  | 1.28110000  | 2.89235700  |
| C  | 0.03296600  | 0.96820000  | -0.38375100 | H | -10.53301400 | -1.52900300 | 0.31888700  |
| C  | 1.32125600  | -0.95712800 | -0.11944400 | H | -10.59440300 | 0.00754900  | 2.27616700  |
| C  | 2.61078700  | -0.23008800 | 0.27955700  | H | 2.80017900   | -0.35266900 | 1.35226600  |
| H  | 0.93490100  | 2.19439100  | 1.09917600  | N | -4.09691700  | -2.46638100 | -0.81527400 |
| H  | 2.93990300  | 1.43032600  | -1.03610700 | H | -4.79381500  | -2.85656300 | -1.42886600 |
| H  | 1.29274900  | -1.02040100 | -1.21685700 | C | -3.91615100  | -4.78357400 | -0.10189000 |
| H  | 0.09356000  | 0.74437200  | -1.45905800 | H | -3.04665300  | -5.36016400 | -0.42641900 |
| O  | 0.19502800  | -0.22653300 | 0.34446900  | H | -4.21494700  | -5.16579100 | 0.87554200  |
| O  | 3.40708200  | 1.94854300  | 0.92255500  | H | -4.72853200  | -4.94742000 | -0.81244600 |
| C  | 1.17333200  | -2.36945200 | 0.42884600  | N | 1.00503200   | 3.15009000  | -0.77274200 |
| H  | 1.11846600  | -2.34362600 | 1.52202600  | H | 0.19874300   | 3.18371500  | -1.37927200 |
| H  | 2.03459900  | -2.97114300 | 0.13325900  | C | 1.18171300   | 5.51611400  | -1.34979200 |
| H  | 3.24638400  | 2.91264900  | 0.85107200  | H | 0.79878700   | 6.28612100  | -0.67639800 |
| O  | 0.00012600  | -2.97520800 | -0.12148900 | H | 2.04866800   | 5.93662800  | -1.86252300 |
| H  | -0.70710300 | -3.04951500 | 0.53876800  | H | 0.41291600   | 5.27751100  | -2.08679700 |
| C  | -2.48139600 | -0.54547600 | -0.65332600 | C | 1.63145100   | 4.32976400  | -0.52351000 |
| C  | -3.91955400 | -1.01888600 | -0.94383900 | O | 2.52454500   | 4.44602300  | 0.31459400  |
| C  | -2.39034200 | 0.98833000  | -0.70225700 | C | -3.50275700  | -3.33125900 | 0.04839600  |
| H  | -2.18566200 | -0.86937100 | 0.34156500  | O | -2.66975500  | -3.00253100 | 0.89337200  |
| C  | -4.95458700 | -0.25156300 | -0.11332900 | C | 4.84036100   | -1.14972500 | 0.15508100  |
| H  | -4.13313900 | -0.78158800 | -1.99065300 | C | 5.67155300   | -2.13759900 | -0.67227400 |
| C  | -3.53507600 | 1.65332000  | 0.07890400  | H | 4.65350500   | -1.60452900 | 1.14653600  |
| H  | -2.41628200 | 1.31486400  | -1.74781400 | C | 6.73754600   | -0.07343000 | 1.09765800  |
| H  | -4.84990200 | -0.46961800 | 0.95972000  | C | 7.03869100   | -2.29974800 | 0.01026100  |
| H  | -3.38630700 | 1.44664400  | 1.14922900  | H | 5.16085200   | -3.11138400 | -0.67202200 |
| O  | -4.80243700 | 1.13829400  | -0.34173900 | C | 7.70345100   | -0.95078400 | 0.29140100  |
| O  | -6.22123700 | -0.63527600 | -0.56526600 | H | 6.52126000   | -0.55843400 | 2.06262700  |
| O  | -1.20780500 | 1.52310100  | -0.07197000 | H | 6.90317700   | -2.81403400 | 0.97309900  |
| C  | -3.60517700 | 3.16389400  | -0.11682400 | H | 7.92939300   | -0.45758300 | -0.66062700 |
| H  | -4.41965800 | 3.55983500  | 0.50235600  | O | 5.53609000   | 0.06034700  | 0.34191400  |
| H  | -2.67081400 | 3.61653100  | 0.21248000  | O | 8.91573200   | -1.26262700 | 0.99160100  |
| O  | -3.77829600 | 3.53371500  | -1.47711400 | O | 7.83711900   | -3.10452600 | -0.85111400 |
| H  | -4.62076700 | 3.17521700  | -1.78436100 | O | 5.81910500   | -1.65833000 | -1.99268000 |
| O  | -1.62677500 | -1.11156500 | -1.63513100 | C | 7.17876600   | 1.36116100  | 1.36193900  |
| H  | -1.05769700 | -1.78447300 | -1.21767700 | H | 8.07036200   | 1.37876000  | 1.99475000  |
| O  | 3.63925400  | -0.88044000 | -0.48339200 | H | 7.42344100   | 1.84157200  | 0.40192000  |
| C  | -7.33115500 | -0.41354400 | 0.22712200  | O | 6.17430800   | 2.07181300  | 2.05007400  |
| C  | -7.35763800 | 0.46180800  | 1.31264300  | H | 5.32738700   | 1.94782100  | 1.58247500  |
| C  | -8.47667400 | -1.12685900 | -0.13145800 | H | 9.52347100   | -0.51621900 | 0.94813800  |
| C  | -8.53651900 | 0.59963100  | 2.04787200  | H | 8.74029200   | -3.09463900 | -0.50740600 |
| H  | -6.48805300 | 1.05250400  | 1.56874700  | H | 6.51173800   | -2.19047900 | -2.40848900 |
| C  | -9.64651500 | -0.97146800 | 0.60348500  |   |              |             |             |

|    |             |             |             |   |              |             |             |
|----|-------------|-------------|-------------|---|--------------|-------------|-------------|
| L1 |             |             |             | H | -8.70108800  | 1.06933500  | 0.89848300  |
| C  | 2.64142300  | -1.00074900 | -0.30643400 | C | -9.80976300  | -1.07540000 | -1.50744500 |
| C  | 1.19846400  | -1.53154300 | -0.50357200 | H | -8.53124300  | -2.33784600 | -2.68997100 |
| C  | 0.12280900  | -0.50835800 | -0.11396200 | H | -10.80788600 | 0.28168200  | -0.16191000 |
| C  | 1.60312600  | 1.31616100  | -0.30718300 | H | -10.72510000 | -1.42240000 | -1.97430200 |
| C  | 2.80074500  | 0.47165300  | -0.75343600 | H | 2.88948400   | 0.50101800  | -1.84676200 |
| H  | 1.06781800  | -1.70436300 | -1.57509400 | N | -4.58681500  | 2.48932000  | 0.18793100  |
| H  | 2.89384100  | -1.05148200 | 0.75676700  | H | -5.34874000  | 2.58928700  | -0.46563400 |
| H  | 1.57392100  | 1.34728100  | 0.79165300  | C | -5.10232000  | 4.80813200  | 0.78016900  |
| H  | 0.09561100  | -0.32752100 | 0.96307900  | H | -5.74731200  | 5.00826200  | 1.63904500  |
| O  | 0.41903300  | 0.69440600  | -0.79904900 | H | -4.39169800  | 5.63279800  | 0.70739900  |
| O  | 3.45887300  | -1.88318400 | -1.06372600 | H | -5.71469700  | 4.78370200  | -0.12317800 |
| C  | 1.55707100  | 2.74429000  | -0.82853200 | N | 1.01212200   | -2.82586200 | 0.14454400  |
| H  | 1.49369500  | 2.71811200  | -1.92713600 | H | 1.06629400   | -3.63772100 | -0.44781300 |
| H  | 2.46583700  | 3.28076300  | -0.55049800 | C | 0.79866000   | -4.45455000 | 1.94858100  |
| H  | 4.34340400  | -1.95610900 | -0.67209500 | H | 1.43263500   | -4.64444600 | 2.81499400  |
| O  | 0.46284900  | 3.44956800  | -0.27344900 | H | -0.24165000  | -4.57603800 | 2.26287100  |
| H  | -0.28962400 | 2.84098100  | -0.16450300 | H | 1.01347200   | -5.19507200 | 1.17433700  |
| C  | -2.67272400 | 0.88596900  | -0.00433700 | C | 0.99730300   | -3.01935900 | 1.49624600  |
| C  | -4.12113800 | 1.13028500  | 0.47259000  | O | 1.09074400   | -2.09856900 | 2.29754500  |
| C  | -2.28315000 | -0.59802000 | 0.16506200  | C | -4.33946300  | 3.52805700  | 1.03496200  |
| H  | -2.60440200 | 1.13227700  | -1.07238700 | O | -3.53056200  | 3.43229000  | 1.95464600  |
| C  | -5.06933100 | 0.11599500  | -0.17434600 | C | 5.21728300   | 0.80622900  | -0.67758000 |
| H  | -4.17105800 | 0.97322100  | 1.55524500  | C | 6.13971100   | 1.98766000  | -0.33849600 |
| C  | -3.36900300 | -1.53342800 | -0.38926000 | H | 5.17964500   | 0.66085200  | -1.76976800 |
| H  | -2.12754200 | -0.80523900 | 1.22933800  | C | 6.98120300   | -0.78776600 | -0.47523700 |
| H  | -5.08445100 | 0.23769700  | -1.27134500 | C | 7.59925200   | 1.63020000  | -0.62343900 |
| H  | -3.38743400 | -1.43304500 | -1.48539300 | H | 5.84343900   | 2.84496600  | -0.95822600 |
| O  | -4.65664200 | -1.19273700 | 0.14383000  | C | 7.98094900   | 0.27444900  | -0.01595600 |
| O  | -6.34751700 | 0.32940600  | 0.34582800  | H | 7.01622500   | -0.87412100 | -1.57185800 |
| O  | -1.11653400 | -0.96324300 | -0.57302100 | H | 7.75103500   | 1.56803600  | -1.70624400 |
| C  | -3.14431800 | -3.00188100 | -0.04646800 | H | 7.93588500   | 0.34941300  | 1.07846600  |
| H  | -3.92096700 | -3.59942000 | -0.54124800 | O | 5.67024700   | -0.39237500 | -0.06493300 |
| H  | -2.17196900 | -3.31140900 | -0.42656700 | O | 9.28305100   | -0.10986500 | -0.43513500 |
| O  | -3.12994300 | -3.24904800 | 1.35026400  | O | 8.48773400   | 2.64498700  | -0.16949500 |
| H  | -3.98774200 | -2.99772800 | 1.71585800  | O | 6.07016900   | 2.33626900  | 1.03774200  |
| O  | -1.75550400 | 1.71747900  | 0.69661500  | C | 7.22837400   | -2.15768500 | 0.12006800  |
| H  | -2.22752200 | 2.28255600  | 1.33879400  | H | 8.23689900   | -2.48829700 | -0.14428300 |
| O  | 3.95850200  | 1.10870500  | -0.17391600 | H | 7.14081200   | -2.10419400 | 1.21199100  |
| C  | -7.45243100 | -0.18561000 | -0.30833800 | O | 6.23399500   | -3.02853300 | -0.42696700 |
| C  | -7.39348100 | -1.15253200 | -1.31169300 | H | 6.29929500   | -3.89838000 | -0.01846000 |
| C  | -8.68261700 | 0.32738100  | 0.10782600  | H | 9.86565400   | 0.65116800  | -0.30537800 |
| C  | -8.57902300 | -1.58464000 | -1.91011900 | H | 8.16204600   | 2.95694900  | 0.68759500  |
| H  | -6.44944500 | -1.59238400 | -1.60451300 | H | 5.14348100   | 2.34958400  | 1.31171000  |
| C  | -9.85493900 | -0.12017300 | -0.49044200 |   |              |             |             |

|    |             |             |             |   |              |             |             |
|----|-------------|-------------|-------------|---|--------------|-------------|-------------|
| L2 |             |             |             | H | -8.36631000  | 0.65658300  | 2.11376200  |
| C  | 2.70082100  | -0.77629400 | -0.56334700 | C | -9.93727100  | -1.14482600 | -0.31614900 |
| C  | 1.25707100  | -1.22802600 | -0.89305500 | H | -8.92727800  | -2.11703100 | -1.94785400 |
| C  | 0.18534400  | -0.30893900 | -0.29304700 | H | -10.63869900 | -0.08143200 | 1.42323500  |
| C  | 1.68694100  | 1.51801500  | -0.12071700 | H | -10.92594800 | -1.46654500 | -0.62544700 |
| C  | 2.87854400  | 0.75077600  | -0.70984800 | H | 2.97982300   | 0.98371000  | -1.77800200 |
| H  | 1.13909100  | -1.16317000 | -1.97777900 | N | -4.54352700  | 2.50008300  | 0.68638200  |
| H  | 2.92865700  | -1.04568000 | 0.46978900  | H | -4.51096800  | 3.00789200  | 1.55444500  |
| H  | 1.67020100  | 1.36881600  | 0.96868400  | C | -5.24241000  | 4.64124800  | -0.25203500 |
| H  | 0.16847800  | -0.36583700 | 0.79942300  | H | -4.60803100  | 5.27703600  | -0.87250200 |
| O  | 0.48126500  | 1.02981700  | -0.69214000 | H | -6.26912500  | 4.76413700  | -0.60397600 |
| O  | 3.55137100  | -1.46914600 | -1.46773500 | H | -5.18408300  | 4.98268200  | 0.78361700  |
| C  | 1.71552600  | 3.00880800  | -0.40147700 | N | 1.04033600   | -2.62516000 | -0.53623000 |
| H  | 1.62760100  | 3.17595100  | -1.48209300 | H | 0.88175600   | -3.27244600 | -1.29012700 |
| H  | 2.65738700  | 3.43744400  | -0.04722600 | C | 0.63574300   | -4.56506300 | 0.88153300  |
| H  | 4.29333300  | -1.87515600 | -0.99239000 | H | 1.13079700   | -4.97999100 | 1.75905500  |
| O  | 0.60230600  | 3.57699000  | 0.29235400  | H | -0.44563800  | -4.62396700 | 1.03691800  |
| H  | 0.48401900  | 4.49574700  | 0.02850500  | H | 0.89052000   | -5.16460800 | 0.00363100  |
| C  | -2.64092900 | 1.01378900  | 0.09190700  | C | 1.01367400   | -3.10339700 | 0.74301500  |
| C  | -4.04720800 | 1.12852200  | 0.71758300  | O | 1.23751900   | -2.39206500 | 1.71489500  |
| C  | -2.20568700 | -0.45852600 | -0.00193300 | C | -4.82855100  | 3.19390900  | -0.45152000 |
| H  | -2.65750600 | 1.43270800  | -0.91881700 | O | -4.77877800  | 2.69067200  | -1.56736100 |
| C  | -5.05621200 | 0.13665100  | 0.12050900  | C | 5.30115500   | 0.87614700  | -0.43297900 |
| H  | -3.95092800 | 0.86203500  | 1.77344100  | C | 6.29564800   | 1.94348000  | 0.04965800  |
| C  | -3.31213200 | -1.31123700 | -0.63619800 | H | 5.34140800   | 0.78922100  | -1.53024700 |
| H  | -1.99299200 | -0.83775900 | 1.00325000  | C | 6.87670300   | -0.88616000 | -0.21793000 |
| H  | -5.32878800 | 0.41289100  | -0.90279300 | C | 7.73492500   | 1.45731200  | -0.14585400 |
| H  | -3.48837800 | -0.96465300 | -1.66601500 | H | 6.13625800   | 2.86050700  | -0.53415000 |
| O  | -4.50896300 | -1.17626300 | 0.13644500  | C | 7.94163400   | 0.03052600  | 0.38388600  |
| O  | -6.18074000 | 0.14254300  | 0.95192100  | H | 6.97653300   | -0.88998900 | -1.31427000 |
| O  | -1.05079500 | -0.64719300 | -0.83038400 | H | 7.97005300   | 1.45254000  | -1.21547100 |
| C  | -3.00276500 | -2.80273700 | -0.68103600 | H | 7.82694600   | 0.03406000  | 1.47585000  |
| H  | -3.83211100 | -3.31476500 | -1.18558100 | O | 5.59282900   | -0.38125500 | 0.14816600  |
| H  | -2.09259700 | -2.96756700 | -1.25582500 | O | 9.22672700   | -0.45289400 | 0.01987700  |
| O  | -2.77690400 | -3.36136100 | 0.60578900  | O | 8.67390800   | 2.34714900  | 0.44697700  |
| H  | -3.56066200 | -3.19779300 | 1.14654000  | O | 6.14420800   | 2.22090500  | 1.43638500  |
| O  | -1.79326800 | 1.77602100  | 0.93925600  | C | 6.93114000   | -2.31950100 | 0.26415100  |
| H  | -1.04347700 | 2.14070600  | 0.44392500  | H | 7.91981900   | -2.73720900 | 0.05541700  |
| O  | 4.03173800  | 1.26609400  | -0.01249200 | H | 6.74170800   | -2.35398400 | 1.34317900  |
| C  | -7.38934500 | -0.31548200 | 0.47443500  | O | 5.91064000   | -3.02769700 | -0.45192200 |
| C  | -7.53749100 | -1.10393700 | -0.66718100 | H | 5.82187600   | -3.92035700 | -0.10115700 |
| C  | -8.50836700 | 0.04723200  | 1.22803500  | H | 9.87138700   | 0.23110400  | 0.24760800  |
| C  | -8.81604800 | -1.50575400 | -1.05779600 | H | 8.31730900   | 2.62094800  | 1.30467800  |
| H  | -6.67278300 | -1.42449700 | -1.23304300 | H | 5.20306100   | 2.23031400  | 1.65517600  |
| C  | -9.77443500 | -0.36913700 | 0.83294800  |   |              |             |             |

|    |             |             |             |   |              |             |             |
|----|-------------|-------------|-------------|---|--------------|-------------|-------------|
| L3 |             |             |             | H | -8.46862200  | -1.44652300 | -1.64513600 |
| C  | 2.67197400  | 0.74407000  | 0.55357800  | C | -9.85527400  | 1.46692400  | -0.54617700 |
| C  | 1.21961500  | 1.10063700  | 0.96441400  | H | -8.75262200  | 3.05146400  | 0.40311900  |
| C  | 0.16378700  | 0.44853900  | 0.06475800  | H | -10.65958900 | -0.27593400 | -1.52769000 |
| C  | 1.67174800  | -1.26872300 | -0.65290700 | H | -10.80857600 | 1.98115800  | -0.48839300 |
| C  | 2.83824900  | -0.75111800 | 0.19596100  | H | 2.89880300   | -1.32477400 | 1.13007200  |
| H  | 1.05816800  | 0.67941300  | 1.95990700  | N | -4.78757200  | -2.59446500 | 0.65927100  |
| H  | 2.94705700  | 1.32934900  | -0.32757700 | H | -4.79693900  | -3.47058400 | 0.16424400  |
| H  | 1.68266700  | -0.77462100 | -1.63359100 | C | -5.62706200  | -3.92737600 | 2.52324800  |
| H  | 0.17680600  | 0.84656100  | -0.95556200 | H | -4.91912700  | -4.28033400 | 3.27689500  |
| O  | 0.45277800  | -0.95295200 | 0.02169700  | H | -6.58428100  | -3.76997100 | 3.02292700  |
| O  | 3.46384100  | 1.10729500  | 1.67479300  | H | -5.74591200  | -4.70277100 | 1.76358300  |
| C  | 1.66233600  | -2.77893500 | -0.86268500 | N | 1.04660000   | 2.54227400  | 1.10118000  |
| H  | 1.60833800  | -3.27905500 | 0.11543700  | H | 1.02150700   | 2.90281500  | 2.04062400  |
| H  | 2.58650200  | -3.08725700 | -1.35027800 | C | 1.11102600   | 4.89827400  | 0.46031700  |
| H  | 4.33751400  | 1.42479000  | 1.39610700  | H | 2.08680200   | 5.35561900  | 0.27895100  |
| O  | 0.60523200  | -3.19433100 | -1.70867900 | H | 0.39315000   | 5.40039200  | -0.19013600 |
| H  | -0.24325900 | -2.97237200 | -1.29985500 | H | 0.83113400   | 5.07133200  | 1.50166400  |
| C  | -2.80664900 | -1.09952500 | 0.54494600  | C | 1.18017400   | 3.43141000  | 0.07434500  |
| C  | -4.18408900 | -1.46094100 | -0.03212400 | O | 1.34018500   | 3.07885900  | -1.08644200 |
| C  | -2.22708000 | 0.15946400  | -0.11208700 | C | -5.13599500  | -2.59892100 | 1.97848100  |
| H  | -2.91323500 | -0.89571200 | 1.61612300  | O | -5.06567000  | -1.60108800 | 2.68479100  |
| C  | -5.11155800 | -0.23581100 | -0.06864800 | C | 5.26075100   | -0.98352000 | 0.02767900  |
| H  | -4.04537000 | -1.77115900 | -1.07114900 | C | 6.21670100   | -1.84287400 | -0.81384900 |
| C  | -3.25768200 | 1.29518200  | -0.12491400 | H | 5.19888800   | -1.38584700 | 1.05211600  |
| H  | -1.92188100 | -0.05872700 | -1.13954900 | C | 6.98322900   | 0.52172500  | 0.68644300  |
| H  | -5.39327600 | 0.07785400  | 0.94136500  | C | 7.65799800   | -1.66010200 | -0.33413700 |
| H  | -3.45970200 | 1.60999600  | 0.90981600  | H | 5.92436300   | -2.89618100 | -0.70442100 |
| O  | -4.46240600 | 0.83358600  | -0.74656700 | C | 8.02696900   | -0.17766900 | -0.18515300 |
| O  | -6.23902800 | -0.59109700 | -0.81223800 | H | 6.97919700   | 0.06567700  | 1.68801800  |
| O  | -1.08700900 | 0.60152300  | 0.65523400  | H | 7.77400800   | -2.13455600 | 0.64607900  |
| C  | -2.81727000 | 2.50685000  | -0.94045800 | H | 8.02941500   | 0.29105500  | -1.17802000 |
| H  | -3.57060100 | 3.29732900  | -0.82897500 | O | 5.69737200   | 0.36367200  | 0.08097500  |
| H  | -1.86593100 | 2.88325800  | -0.56435800 | O | 9.29912900   | -0.04154800 | 0.43206100  |
| O  | -2.61632100 | 2.18785000  | -2.30723000 | O | 8.58448500   | -2.31832800 | -1.18941500 |
| H  | -3.44847000 | 1.84404600  | -2.65785200 | O | 6.19816900   | -1.47200300 | -2.18559600 |
| O  | -1.97292000 | -2.23936500 | 0.35493300  | C | 7.20832500   | 2.01040500  | 0.84176700  |
| H  | -1.07239200 | -1.98192500 | 0.60784300  | H | 8.19616500   | 2.18192100  | 1.27838300  |
| O  | 4.01477200  | -1.01645400 | -0.59197300 | H | 7.15804200   | 2.49529900  | -0.14049900 |
| C  | -7.39920600 | 0.14472900  | -0.69028400 | O | 6.16877000   | 2.49338800  | 1.69914500  |
| C  | -7.46852600 | 1.41539900  | -0.11862100 | H | 6.23745500   | 3.44965100  | 1.79203400  |
| C  | -8.54957100 | -0.46033000 | -1.20151300 | H | 9.91073900   | -0.63428000 | -0.02615600 |
| C  | -8.70253900 | 2.06377000  | -0.04420100 | H | 8.29942300   | -2.16833000 | -2.10271000 |
| H  | -6.57601100 | 1.90891900  | 0.24249000  | H | 5.28238400   | -1.36305700 | -2.47316800 |
| C  | -9.76987700 | 0.20169100  | -1.12980900 |   |              |             |             |



|    |             |             |             |   |             |             |             |
|----|-------------|-------------|-------------|---|-------------|-------------|-------------|
| L4 |             |             |             | H | 8.51240100  | -1.28506200 | 1.24898900  |
| C  | -2.59378200 | 1.04548900  | -0.39207900 | C | 9.72034600  | 0.03588800  | -1.65064800 |
| C  | -1.20088200 | 1.71021000  | -0.55575800 | H | 8.52977300  | 1.11661600  | -3.07933900 |
| C  | -0.07368900 | 0.88638100  | 0.07758800  | H | 10.62948400 | -1.06198300 | -0.03313600 |
| C  | -1.32301900 | -1.11900200 | 0.01805900  | H | 10.64070500 | 0.13520400  | -2.21584000 |
| C  | -2.55953100 | -0.48496500 | -0.62789300 | H | -2.54848400 | -0.66724700 | -1.71028100 |
| H  | -0.98507000 | 1.73979500  | -1.62671500 | N | 4.19160400  | -2.26225500 | 1.09493100  |
| H  | -2.94664300 | 1.21729900  | 0.62750000  | H | 4.91868000  | -2.51272300 | 1.74550800  |
| H  | -1.39889500 | -1.00946700 | 1.11027900  | C | 4.11131700  | -4.67171400 | 0.79482400  |
| H  | -0.14792900 | 0.84681500  | 1.16704000  | H | 3.27966400  | -5.22114700 | 1.24241800  |
| O  | -0.17769300 | -0.43151000 | -0.45584700 | H | 4.40482500  | -5.20469600 | -0.11099300 |
| O  | -3.43681800 | 1.69334900  | -1.33596700 | H | 4.94784500  | -4.67291000 | 1.49636800  |
| C  | -1.09390100 | -2.59286700 | -0.29429500 | N | -1.21921100 | 3.09704200  | -0.10400000 |
| H  | -0.95027900 | -2.72552500 | -1.37193600 | H | -1.16746600 | 3.80744300  | -0.81447500 |
| H  | -1.96035000 | -3.17991500 | 0.01553300  | C | -1.37452500 | 4.99036300  | 1.42712500  |
| H  | -4.31315800 | 1.86046200  | -0.95523900 | H | -2.21022900 | 5.26102900  | 2.07394600  |
| O  | 0.04450100  | -3.06104300 | 0.43055700  | H | -0.45352400 | 5.24232700  | 1.95882900  |
| H  | 0.80435300  | -3.21111000 | -0.15461100 | H | -1.42003900 | 5.58620500  | 0.51273000  |
| C  | 2.49338300  | -0.46709800 | 0.61834700  | C | -1.40234500 | 3.49081700  | 1.18869500  |
| C  | 3.94208300  | -0.82200000 | 1.00116900  | O | -1.55503300 | 2.69740500  | 2.10860900  |
| C  | 2.32540400  | 1.05296200  | 0.42846300  | C | 3.62186500  | -3.28711300 | 0.40962900  |
| H  | 2.23650700  | -0.95104100 | -0.32084100 | O | 2.75778200  | -3.15138700 | -0.45714100 |
| C  | 4.95751400  | -0.14048700 | 0.07877100  | C | -4.94563600 | -0.99816200 | -0.62139400 |
| H  | 4.12074100  | -0.41821600 | 2.00272100  | C | -5.79845600 | -2.21840400 | -0.23966300 |
| C  | 3.46802100  | 1.65733100  | -0.40425700 | H | -4.87278900 | -0.91749300 | -1.71804600 |
| H  | 2.28143900  | 1.53556600  | 1.41089100  | C | -6.81310300 | 0.47671600  | -0.60243400 |
| H  | 4.87793900  | -0.51645100 | -0.95235000 | C | -7.26559700 | -1.98007200 | -0.60460300 |
| H  | 3.35594000  | 1.30728300  | -1.44134700 | H | -5.42050600 | -3.09213100 | -0.78801400 |
| O  | 4.74737200  | 1.25767000  | 0.10205200  | C | -7.76526600 | -0.61450700 | -0.11281000 |
| O  | 6.23306700  | -0.40176000 | 0.59378900  | H | -6.79694000 | 0.48039700  | -1.70314800 |
| O  | 1.15276800  | 1.40554500  | -0.32722400 | H | -7.37413100 | -2.00310300 | -1.69409700 |
| C  | 3.48241300  | 3.18254000  | -0.40553400 | H | -7.77079500 | -0.61016200 | 0.98508500  |
| H  | 4.26214200  | 3.52459600  | -1.09866200 | O | -5.50566300 | 0.19559800  | -0.10127400 |
| H  | 2.52013900  | 3.55418700  | -0.75526800 | O | -9.06657300 | -0.35018000 | -0.61813600 |
| O  | 3.68415300  | 3.72900200  | 0.88809900  | O | -8.10442000 | -3.02035100 | -0.11521400 |
| H  | 4.52870900  | 3.40270200  | 1.22465500  | O | -5.76434800 | -2.47198100 | 1.15898400  |
| O  | 1.65053500  | -0.92841700 | 1.66280400  | C | -7.16701800 | 1.87009300  | -0.12921900 |
| H  | 1.06938400  | -1.63266000 | 1.32543400  | H | -8.18076600 | 2.11770000  | -0.45614300 |
| O  | -3.68859100 | -1.17492000 | -0.05244000 | H | -7.11879600 | 1.91099600  | 0.96530900  |
| C  | 7.34800000  | -0.21709700 | -0.19865900 | O | -6.20370100 | 2.75521900  | -0.71263900 |
| C  | 7.34528500  | 0.46832100  | -1.41376800 | H | -6.32685900 | 3.64690900  | -0.36995300 |
| C  | 8.53325600  | -0.76423200 | 0.29791300  | H | -9.60550100 | -1.13762700 | -0.46053100 |
| C  | 8.53550100  | 0.58223100  | -2.13467400 | H | -7.80338300 | -3.24375400 | 0.77768200  |
| H  | 6.44264700  | 0.93476500  | -1.78536800 | H | -4.85870800 | -2.35945300 | 1.47668600  |
| C  | 9.71277700  | -0.63426000 | -0.42621300 |   |             |             |             |

|    |             |             |             |   |              |             |             |
|----|-------------|-------------|-------------|---|--------------|-------------|-------------|
| L5 |             |             |             | H | -8.72380300  | 1.01831700  | 0.89463300  |
| C  | 2.62968400  | -0.98829100 | -0.18303100 | C | -9.81451900  | -1.09425600 | -1.54779000 |
| C  | 1.19425400  | -1.49610100 | -0.46113000 | H | -8.52441800  | -2.31725800 | -2.75889300 |
| C  | 0.11921800  | -0.46570500 | -0.08636500 | H | -10.82460800 | 0.22411200  | -0.17295700 |
| C  | 1.63591100  | 1.33754600  | -0.18886600 | H | -10.72717300 | -1.44418000 | -2.01776200 |
| C  | 2.82861700  | 0.48000100  | -0.62375600 | H | 2.92446300   | 0.51032500  | -1.71759800 |
| H  | 1.10844100  | -1.63401600 | -1.54251800 | N | -4.62482000  | 2.50338900  | 0.19121800  |
| H  | 2.82348000  | -1.03985600 | 0.89290600  | H | -5.37150400  | 2.60992100  | -0.47853800 |
| H  | 1.57641700  | 1.34333800  | 0.90857700  | C | -5.16203000  | 4.81117700  | 0.80610100  |
| H  | 0.05743000  | -0.31201300 | 0.99331300  | H | -5.81566500  | 4.99991000  | 1.66095500  |
| O  | 0.45375900  | 0.74800400  | -0.73044300 | H | -4.45439100  | 5.63961800  | 0.74798200  |
| O  | 3.47811000  | -1.88482100 | -0.89101700 | H | -5.76603800  | 4.79319400  | -0.10308400 |
| C  | 1.63283600  | 2.77769500  | -0.67580900 | N | 0.95739600   | -2.80721300 | 0.13556600  |
| H  | 1.63351100  | 2.78181300  | -1.77693200 | H | 1.04842200   | -3.60074000 | -0.47679300 |
| H  | 2.52809000  | 3.29328800  | -0.32613500 | C | 0.58731200   | -4.49102900 | 1.85957600  |
| H  | 4.35232200  | -1.92329500 | -0.47405100 | H | 1.11593100   | -4.71305300 | 2.78669900  |
| O  | 0.51127500  | 3.47969800  | -0.16965200 | H | -0.48390400  | -4.60842400 | 2.04689300  |
| H  | -0.24642200 | 2.87203200  | -0.11096300 | H | 0.88421300   | -5.21040200 | 1.09216700  |
| C  | -2.69392800 | 0.92310800  | -0.01360900 | C | 0.84612300   | -3.04514500 | 1.47576400  |
| C  | -4.14753900 | 1.14498600  | 0.45824700  | O | 0.89650400   | -2.15530200 | 2.31444800  |
| C  | -2.29192000 | -0.55991300 | 0.13000800  | C | -4.39538500  | 3.53193300  | 1.05538800  |
| H  | -2.62159400 | 1.18885000  | -1.07708000 | O | -3.59947600  | 3.42859000  | 1.98506800  |
| C  | -5.08418300 | 0.13230300  | -0.20806900 | C | 5.22635000   | 0.79970200  | -0.55274400 |
| H  | -4.20131200 | 0.97245800  | 1.53827000  | C | 6.18778100   | 1.96863000  | -0.30996400 |
| C  | -3.36262900 | -1.48965600 | -0.46063700 | H | 5.16030500   | 0.61822800  | -1.63928100 |
| H  | -2.15128100 | -0.78931000 | 1.19180900  | C | 6.97924300   | -0.82773400 | -0.43478800 |
| H  | -5.10436800 | 0.27829600  | -1.30217100 | C | 7.58412300   | 1.56712700  | -0.79697600 |
| H  | -3.37837100 | -1.35357300 | -1.55306900 | H | 5.83848500   | 2.82390000  | -0.90497600 |
| O  | -4.65598700 | -1.17877500 | 0.07832500  | C | 8.03474900   | 0.25539200  | -0.15729100 |
| O  | -6.36376100 | 0.31832100  | 0.32028300  | H | 6.91567300   | -0.99506800 | -1.52132600 |
| O  | -1.11084200 | -0.89436000 | -0.59705800 | H | 7.56251000   | 1.42377200  | -1.88766600 |
| C  | -3.12463100 | -2.96665500 | -0.16818300 | H | 8.13039100   | 0.40443400  | 0.92324500  |
| H  | -3.89516200 | -3.55374400 | -0.68484500 | O | 5.71917600   | -0.39316400 | 0.06734600  |
| H  | -2.14887900 | -3.25274900 | -0.55768000 | O | 9.31087200   | -0.04841800 | -0.73862700 |
| O  | -3.10966400 | -3.26385000 | 1.21893300  | O | 8.46536200   | 2.63441000  | -0.47200800 |
| H  | -3.96533000 | -3.02035900 | 1.59472900  | O | 6.20648300   | 2.29378200  | 1.06479100  |
| O  | -1.78787000 | 1.74821500  | 0.70685900  | C | 7.26599300   | -2.15686000 | 0.23627700  |
| H  | -2.26639000 | 2.30147500  | 1.35352100  | H | 8.25992300   | -2.51583500 | -0.05863200 |
| O  | 3.98515000  | 1.09121000  | -0.02937000 | H | 7.23656400   | -2.02686500 | 1.32506600  |
| C  | -7.46382200 | -0.19729300 | -0.34018000 | O | 6.25753400   | -3.06748400 | -0.19652200 |
| C  | -7.39664400 | -1.14392400 | -1.36231300 | H | 6.26561100   | -3.85777600 | 0.35422600  |
| C  | -8.69908900 | 0.29188900  | 0.08985900  | H | 9.84492100   | -0.55825300 | -0.12056100 |
| C  | -8.57885800 | -1.57974000 | -1.96457800 | H | 9.36479300   | 2.34881500  | -0.67922100 |
| H  | -6.44807700 | -1.56585100 | -1.66650900 | H | 6.89092100   | 2.96472100  | 1.19070900  |
| C  | -9.86787800 | -0.15916100 | -0.51260500 |   |              |             |             |

|    |             |             |             |   |              |             |             |
|----|-------------|-------------|-------------|---|--------------|-------------|-------------|
| L6 |             |             |             | H | -8.41544900  | 0.58376700  | 2.05056300  |
| C  | 2.70130600  | -0.74063500 | -0.48577300 | C | -9.93174500  | -1.13291200 | -0.47377400 |
| C  | 1.26712200  | -1.18904700 | -0.85808400 | H | -8.88704300  | -2.03387100 | -2.12435700 |
| C  | 0.18368800  | -0.29748000 | -0.23531800 | H | -10.67049400 | -0.14234600 | 1.29299000  |
| C  | 1.68585300  | 1.52118500  | 0.00456200  | H | -10.91264100 | -1.44900900 | -0.81235200 |
| C  | 2.86822300  | 0.78500700  | -0.63953300 | H | 2.91244200   | 1.02102500  | -1.71223300 |
| H  | 1.16608600  | -1.07940800 | -1.94114300 | N | -4.55292000  | 2.48565600  | 0.76458000  |
| H  | 2.90050200  | -1.00331000 | 0.55466600  | H | -4.51134800  | 2.96739200  | 1.64710300  |
| H  | 1.68608000  | 1.31523900  | 1.08429600  | C | -5.19089900  | 4.67188400  | -0.11150600 |
| H  | 0.15485000  | -0.40148900 | 0.85419300  | H | -4.46826700  | 5.31285200  | -0.62127100 |
| O  | 0.47147100  | 1.05635700  | -0.57507500 | H | -6.16714100  | 4.85954800  | -0.56278300 |
| O  | 3.58904800  | -1.43365500 | -1.35718800 | H | -5.22997700  | 4.95257600  | 0.94309700  |
| C  | 1.71246500  | 3.02388600  | -0.19216800 | N | 1.04629600   | -2.60136300 | -0.56708700 |
| H  | 1.64544400  | 3.25619600  | -1.26276100 | H | 0.82795000   | -3.19859700 | -1.34696700 |
| H  | 2.64470500  | 3.42768000  | 0.21029200  | C | 0.59388300   | -4.60136300 | 0.74592100  |
| H  | 4.25167800  | -1.91152200 | -0.83542400 | H | 1.06611600   | -5.07622600 | 1.60544000  |
| O  | 0.57867900  | 3.54551500  | 0.50864800  | H | -0.49058500  | -4.63437700 | 0.88804400  |
| H  | 0.50684800  | 4.49357700  | 0.35567000  | H | 0.83938300   | -5.16300400 | -0.15939100 |
| C  | -2.64431300 | 1.01308500  | 0.15633900  | C | 1.01939200   | -3.14669300 | 0.68470000  |
| C  | -4.06407200 | 1.11095500  | 0.75517800  | O | 1.28134700   | -2.50035900 | 1.69170500  |
| C  | -2.21245600 | -0.45737100 | 0.01615300  | C | -4.81220700  | 3.22127000  | -0.35308700 |
| H  | -2.63622900 | 1.47019600  | -0.83793700 | O | -4.76085000  | 2.75380900  | -1.48427900 |
| C  | -5.06403200 | 0.14610300  | 0.10248100  | C | 5.27530300   | 0.87793400  | -0.39797100 |
| H  | -3.99095700 | 0.80578400  | 1.80240300  | C | 6.34227200   | 1.94194600  | -0.11519700 |
| C  | -3.31088300 | -1.28248800 | -0.66690800 | H | 5.27619400   | 0.65006600  | -1.47574600 |
| H  | -2.01821300 | -0.87207000 | 1.01123700  | C | 6.78570800   | -0.93185200 | -0.10473200 |
| H  | -5.31246200 | 0.45765700  | -0.91678800 | C | 7.72126200   | 1.34963600  | -0.43975000 |
| H  | -3.46604300 | -0.90000500 | -1.68736800 | H | 6.16356300   | 2.79628300  | -0.78376700 |
| O  | -4.52207700 | -1.16904100 | 0.08658700  | C | 7.94719900   | 0.00654300  | 0.25788900  |
| O  | -6.20717100 | 0.12871400  | 0.90857700  | H | 6.78053900   | -1.08372900 | -1.19607700 |
| O  | -1.04554600 | -0.62380100 | -0.79931900 | H | 7.79430700   | 1.17873100  | -1.52400800 |
| C  | -3.00798300 | -2.77319200 | -0.75705700 | H | 7.96510600   | 0.16393700  | 1.34155400  |
| H  | -3.83112500 | -3.26363100 | -1.29233900 | O | 5.57404000   | -0.32001900 | 0.31283200  |
| H  | -2.08919700 | -2.92375000 | -1.32194100 | O | 9.22255700   | -0.45950100 | -0.20440500 |
| O  | -2.80712100 | -3.37601200 | 0.51404800  | O | 8.69026000   | 2.31197500  | -0.04189000 |
| H  | -3.59720700 | -3.22067200 | 1.04802600  | O | 6.27205500   | 2.34877700  | 1.23625900  |
| O  | -1.81536600 | 1.73870400  | 1.05151600  | C | 6.81622700   | -2.29605500 | 0.55451400  |
| H  | -1.05310600 | 2.12186500  | 0.58906600  | H | 7.77593300   | -2.79111100 | 0.36486500  |
| O  | 4.03071400  | 1.32426300  | 0.00760600  | H | 6.67109200   | -2.18366400 | 1.63462600  |
| C  | -7.40354900 | -0.31821200 | 0.39264000  | O | 5.75120700   | -3.05801500 | -0.02472200 |
| C  | -7.52675300 | -1.06209600 | -0.78149500 | H | 5.50302100   | -3.78021100 | 0.56226600  |
| C  | -8.53812900 | 0.00785400  | 1.13992900  | H | 9.62436900   | -1.03713900 | 0.45308300  |
| C  | -8.79542100 | -1.45706100 | -1.20937900 | H | 9.56435600   | 1.91476000  | -0.15025700 |
| H  | -6.65017700 | -1.35377700 | -1.34466600 | H | 7.05773100   | 2.88455400  | 1.41214400  |
| C  | -9.79416400 | -0.40124700 | 0.70714200  |   |              |             |             |

|    |             |             |             |   |              |             |             |
|----|-------------|-------------|-------------|---|--------------|-------------|-------------|
| L7 |             |             |             | H | -8.49299400  | -1.46729800 | -1.59451400 |
| C  | 2.65844400  | 0.79718200  | 0.45560500  | C | -9.88204400  | 1.41374300  | -0.41588200 |
| C  | 1.21229700  | 1.12299300  | 0.90612800  | H | -8.77549000  | 2.98597800  | 0.54923500  |
| C  | 0.15172800  | 0.47839100  | 0.00557300  | H | -10.68948200 | -0.31415500 | -1.42106000 |
| C  | 1.67682200  | -1.20298300 | -0.76361800 | H | -10.83767200 | 1.92032800  | -0.33362900 |
| C  | 2.83654400  | -0.69552900 | 0.10078900  | H | 2.87770000   | -1.27105600 | 1.03618800  |
| H  | 1.07445100  | 0.67169700  | 1.89225800  | N | -4.75693400  | -2.62927200 | 0.62988100  |
| H  | 2.89883400  | 1.38363600  | -0.43525000 | H | -4.74869000  | -3.49936400 | 0.12421300  |
| H  | 1.68251500  | -0.68191400 | -1.72957700 | C | -5.54157100  | -4.00810300 | 2.48391900  |
| H  | 0.14562800  | 0.90335500  | -1.00391100 | H | -4.80813700  | -4.36442600 | 3.21125700  |
| O  | 0.45270800  | -0.91747100 | -0.07760700 | H | -6.48761500  | -3.87648500 | 3.01140300  |
| O  | 3.47806600  | 1.18223900  | 1.55158700  | H | -5.66771500  | -4.76999400 | 1.71184800  |
| C  | 1.69043900  | -2.70564700 | -1.01673400 | N | 1.01738900   | 2.55712800  | 1.08906000  |
| H  | 1.66845800  | -3.23629900 | -0.05315000 | H | 1.00767600   | 2.88775300  | 2.03967700  |
| H  | 2.60926000  | -2.97440100 | -1.53573600 | C | 1.03254300   | 4.93349300  | 0.52795100  |
| H  | 4.34071800  | 1.49431100  | 1.23795500  | H | 1.99782100   | 5.41235900  | 0.34568500  |
| O  | 0.62063500  | -3.11877000 | -1.84962300 | H | 0.29562900   | 5.44608400  | -0.09233500 |
| H  | -0.22111000 | -2.91194100 | -1.42036000 | H | 0.76859800   | 5.06681200  | 1.57931400  |
| C  | -2.79543600 | -1.10928800 | 0.51071200  | C | 1.11695700   | 3.48131500  | 0.09030600  |
| C  | -4.17801500 | -1.47601700 | -0.05032500 | O | 1.25813700   | 3.17237700  | -1.08494400 |
| C  | -2.23883300 | 0.16435100  | -0.13758400 | C | -5.08611900  | -2.66105300 | 1.95348200  |
| H  | -2.88774900 | -0.92067900 | 1.58619000  | O | -5.02688700  | -1.67325300 | 2.67483600  |
| C  | -5.11844700 | -0.26054800 | -0.04869400 | C | 5.24133300   | -0.94152400 | -0.03645500 |
| H  | -4.05306100 | -1.76576600 | -1.09694700 | C | 6.22564500   | -1.86038800 | -0.76900000 |
| C  | -3.28043000 | 1.29000100  | -0.11727800 | H | 5.14585800   | -1.28638300 | 1.00715900  |
| H  | -1.94745300 | -0.03693700 | -1.17250100 | C | 6.96182200   | 0.55890400  | 0.66854100  |
| H  | -5.38397900 | 0.03373600  | 0.97149600  | C | 7.60748100   | -1.71782500 | -0.12052800 |
| H  | -3.46557100 | 1.58956300  | 0.92510700  | H | 5.88341800   | -2.89715000 | -0.64234000 |
| O  | -4.49330600 | 0.82585500  | -0.72171200 | C | 8.04510700   | -0.25506400 | -0.05745600 |
| O  | -6.25729000 | -0.61454100 | -0.77611300 | H | 6.86830300   | 0.18894300  | 1.70158400  |
| O  | -1.09228300 | 0.60540100  | 0.61899000  | H | 7.56719000   | -2.10358600 | 0.90906600  |
| C  | -2.86770000 | 2.51635200  | -0.92549400 | H | 8.16472200   | 0.12343300  | -1.07788600 |
| H  | -3.62340600 | 3.30000000  | -0.78430100 | O | 5.72487800   | 0.40220100  | -0.02023100 |
| H  | -1.90984700 | 2.89383800  | -0.56754300 | O | 9.30251700   | -0.25049400 | 0.63234200  |
| O  | -2.69855700 | 2.21850400  | -2.30112900 | O | 8.51155800   | -2.49917200 | -0.88998900 |
| H  | -3.53397800 | 1.86435100  | -2.63325700 | O | 6.27044200   | -1.51556400 | -2.13797600 |
| O  | -1.95409100 | -2.23744400 | 0.29220400  | C | 7.22908400   | 2.04997400  | 0.72035200  |
| H  | -1.04774100 | -1.96947600 | 0.51307400  | H | 8.20221800   | 2.23809500  | 1.18996200  |
| O  | 4.01514400  | -0.96098900 | -0.67205700 | H | 7.23309700   | 2.45557400  | -0.29866400 |
| C  | -7.41962500 | 0.11108300  | -0.62295900 | O | 6.18049200   | 2.63050400  | 1.49553600  |
| C  | -7.48889000 | 1.36949000  | -0.02453300 | H | 6.20086400   | 3.59020800  | 1.41451900  |
| C  | -8.57376100 | -0.49097000 | -1.12954500 | H | 9.84238500   | 0.49002200  | 0.33662900  |
| C  | -8.72577000 | 2.00791400  | 0.08113600  | H | 9.40277800   | -2.34142000 | -0.55184100 |
| H  | -6.59438200 | 1.86160500  | 0.33341400  | H | 6.98240000   | -2.03196700 | -2.53957200 |
| C  | -9.79709400 | 0.16124600  | -1.02646300 |   |              |             |             |

|    |             |             |             |   |              |             |             |
|----|-------------|-------------|-------------|---|--------------|-------------|-------------|
| L8 |             |             |             | H | -8.52215900  | -1.22717400 | -1.26294900 |
| C  | 2.59708200  | 1.00930300  | 0.34567900  | C | -9.69698800  | -0.05638900 | 1.71398900  |
| C  | 1.21536700  | 1.67771100  | 0.57353400  | H | -8.49001000  | 0.95155300  | 3.18164800  |
| C  | 0.07454900  | 0.88563500  | -0.07747700 | H | -10.62416400 | -1.07236100 | 0.05371700  |
| C  | 1.31343800  | -1.12607800 | -0.09314900 | H | -10.61064700 | 0.01261500  | 2.29441700  |
| C  | 2.55090700  | -0.52010800 | 0.57708000  | H | 2.51218700   | -0.70305900 | 1.66009900  |
| H  | 1.02175000  | 1.65698600  | 1.64916400  | N | -4.18817200  | -2.20634400 | -1.20838600 |
| H  | 2.90993400  | 1.18412300  | -0.68594600 | H | -4.86808800  | -2.43719000 | -1.91442800 |
| H  | 1.39219200  | -0.97464100 | -1.17960300 | C | -4.07524800  | -4.62602300 | -1.01334400 |
| H  | 0.14148100  | 0.88639400  | -1.16871200 | H | -3.21578300  | -5.12821400 | -1.46419100 |
| O  | 0.16918100  | -0.44985600 | 0.40595600  | H | -4.38094400  | -5.21470900 | -0.14709000 |
| O  | 3.49465600  | 1.63704400  | 1.25621900  | H | -4.89000200  | -4.61017400 | -1.74005000 |
| C  | 1.08309400  | -2.61060800 | 0.15736300  | N | 1.22761600   | 3.08563600  | 0.19055000  |
| H  | 0.97464000  | -2.79785100 | 1.23121200  | H | 1.12952400   | 3.75839200  | 0.93201400  |
| H  | 1.93413700  | -3.18188100 | -0.21471100 | C | 1.33161700   | 5.06078100  | -1.23579200 |
| H  | 4.31293900  | 1.88343000  | 0.79955700  | H | 2.13860400   | 5.38543200  | -1.89391400 |
| O  | -0.08616000 | -3.03775100 | -0.54887800 | H | 0.38767400   | 5.31885600  | -1.72280600 |
| H  | -0.83091200 | -3.18328300 | 0.05524200  | H | 1.39445200   | 5.60860600  | -0.29265300 |
| C  | -2.49572600 | -0.43313700 | -0.65554800 | C | 1.40049300   | 3.55097300  | -1.07872900 |
| C  | -3.94810700 | -0.77178700 | -1.04240700 | O | 1.57635300   | 2.81399100  | -2.04031600 |
| C  | -2.32699000 | 1.07710200  | -0.40107200 | C | -3.63531600  | -3.25210400 | -0.54044500 |
| H  | -2.23346200 | -0.95606900 | 0.26086000  | O | -2.82001100  | -3.13848800 | 0.37486300  |
| C  | -4.95520600 | -0.13914500 | -0.07754600 | C | 4.92004100   | -1.00697100 | 0.55788100  |
| H  | -4.13741400 | -0.31965600 | -2.02088400 | C | 5.81025300   | -2.23948800 | 0.35926400  |
| C  | -3.46041100 | 1.63743900  | 0.47418200  | H | 4.84838000   | -0.79114700 | 1.63658000  |
| H  | -2.29841800 | 1.60325800  | -1.36163700 | C | 6.75302800   | 0.50943100  | 0.44910600  |
| H  | -4.86506000 | -0.56571000 | 0.93250000  | C | 7.22849900   | -1.90347800 | 0.83963200  |
| H  | -3.33339900 | 1.23819400  | 1.49156800  | H | 5.41282000   | -3.05347600 | 0.98207400  |
| O  | -4.74588000 | 1.25946700  | -0.03355100 | C | 7.75669400   | -0.62466700 | 0.18815500  |
| O  | -6.23657800 | -0.37365200 | -0.59119200 | H | 6.67107900   | 0.66916000  | 1.53612000  |
| O  | -1.14550800 | 1.40188300  | 0.35344500  | H | 7.21428300   | -1.74498300 | 1.92823400  |
| C  | -3.47924600 | 3.16072600  | 0.54880200  | H | 7.85097300   | -0.78723900 | -0.89071000 |
| H  | -4.24804900 | 3.46649600  | 1.27062000  | O | 5.49361300   | 0.12909500  | -0.08779400 |
| H  | -2.51214100 | 3.51907000  | 0.89911200  | O | 9.04367800   | -0.38974000 | 0.77706000  |
| O  | -3.70578500 | 3.76725900  | -0.71379500 | O | 8.05009000   | -3.02236600 | 0.53077700  |
| H  | -4.54942400 | 3.44335600  | -1.05512700 | O | 5.81406700   | -2.61479200 | -1.00288600 |
| O  | -1.66147100 | -0.85239400 | -1.72359300 | C | 7.10034800   | 1.83641400  | -0.19514900 |
| H  | -1.07990600 | -1.57133100 | -1.41776000 | H | 8.10724000   | 2.15134500  | 0.10402300  |
| O  | 3.66773700  | -1.22880100 | 0.01933200  | H | 7.05935400   | 1.73431200  | -1.28564900 |
| C  | -7.34144500 | -0.23202900 | 0.22263600  | O | 6.13185100   | 2.78357400  | 0.26382000  |
| C  | -7.32523300 | 0.39076900  | 1.47107600  | H | 6.12404200   | 3.55503800  | -0.31283300 |
| C  | -8.53233900 | -0.75508800 | -0.28660800 | H | 9.60567500   | 0.09700400  | 0.16503800  |
| C  | -8.50678200 | 0.46623400  | 2.21095700  | H | 8.96395900   | -2.78331000 | 0.73387100  |
| H  | -6.41853200 | 0.83867200  | 1.85532400  | H | 6.48763400   | -3.30062000 | -1.10721700 |
| C  | -9.70324400 | -0.66359300 | 0.45709700  |   |              |             |             |

|    |             |             |             |   |              |             |             |
|----|-------------|-------------|-------------|---|--------------|-------------|-------------|
| M1 |             |             |             | H | -8.70124200  | 1.22455600  | 0.53443800  |
| C  | 2.59664300  | -1.12382900 | 0.38079100  | C | -9.73478900  | -1.05583300 | -1.77832800 |
| C  | 1.19245500  | -1.64127200 | 0.00783600  | H | -8.42546600  | -2.41093200 | -2.81557900 |
| C  | 0.12538100  | -0.54926900 | 0.20340200  | H | -10.77038000 | 0.39964400  | -0.57106800 |
| C  | 1.70245700  | 1.20936000  | 0.08603500  | H | -10.63353500 | -1.41938000 | -2.26439100 |
| C  | 2.88489900  | 0.27813200  | -0.18846100 | H | 3.05939000   | 0.21069600  | -1.26766700 |
| H  | 1.19680400  | -1.87662500 | -1.05986200 | N | -4.54236400  | 2.54470200  | -0.09655900 |
| H  | 2.65884500  | -1.04706900 | 1.47233300  | H | -5.26633900  | 2.59980100  | -0.79705000 |
| H  | 1.55760600  | 1.30753800  | 1.17160300  | C | -5.06127100  | 4.90691400  | 0.27980200  |
| H  | -0.01327800 | -0.30749400 | 1.25951500  | H | -5.75841500  | 5.17265400  | 1.07804600  |
| O  | 0.55295100  | 0.60311200  | -0.50217900 | H | -4.34080500  | 5.72144600  | 0.19229100  |
| O  | 3.52585100  | -2.09487700 | -0.09008400 | H | -5.61497100  | 4.81731600  | -0.65671600 |
| C  | 1.77377300  | 2.60420000  | -0.51553100 | N | 0.86290300   | -2.88008900 | 0.70404600  |
| H  | 1.83399700  | 2.51717100  | -1.61125700 | H | 0.92773800   | -3.73172500 | 0.17144000  |
| H  | 2.66477600  | 3.12755400  | -0.16124700 | C | 0.30294000   | -4.36624200 | 2.55422900  |
| H  | 4.41825900  | -1.74479900 | 0.05590600  | H | 0.72329800   | -4.50255800 | 3.55030000  |
| O  | 0.65323800  | 3.37439000  | -0.12774500 | H | -0.78615000  | -4.43208800 | 2.63302600  |
| H  | -0.13307000 | 2.80072300  | -0.09279900 | H | 0.65148200   | -5.17052000 | 1.90173300  |
| C  | -2.64195000 | 0.91376400  | -0.04600700 | C | 0.65909100   | -2.98051400 | 2.05254700  |
| C  | -4.11405700 | 1.20726900  | 0.31974800  | O | 0.70800100   | -2.01172900 | 2.79924500  |
| C  | -2.29218400 | -0.56014700 | 0.24426300  | C | -4.32770700  | 3.64614400  | 0.67709400  |
| H  | -2.50284900 | 1.08829100  | -1.12149500 | O | -3.57024000  | 3.61826900  | 1.64390800  |
| C  | -5.04152500 | 0.15974600  | -0.30626600 | C | 5.21689600   | 0.92440100  | -0.32086900 |
| H  | -4.23191300 | 1.13416200  | 1.40619500  | C | 6.25311200   | 1.70769700  | 0.49582800  |
| C  | -3.34878800 | -1.51035500 | -0.33756700 | H | 5.00509100   | 1.45485100  | -1.26410800 |
| H  | -2.22782400 | -0.70488500 | 1.32782700  | C | 6.88385200   | -0.40416400 | -1.42371300 |
| H  | -5.00717500 | 0.21464200  | -1.40830800 | C | 7.61751000   | 1.65743800  | -0.19654200 |
| H  | -3.30299400 | -1.45621900 | -1.43637400 | H | 5.91825000   | 2.75059200  | 0.57419800  |
| O  | -4.65890500 | -1.13223100 | 0.10660700  | C | 8.00763600   | 0.22851300  | -0.60265500 |
| O  | -6.33798900 | 0.41591200  | 0.14293400  | H | 6.72007900   | 0.17927400  | -2.34097400 |
| O  | -1.07231600 | -0.97872700 | -0.36956400 | H | 7.57996900   | 2.26450600  | -1.10711200 |
| C  | -3.16234500 | -2.96603300 | 0.07550800  | H | 8.16236300   | -0.37111200 | 0.30450600  |
| H  | -3.92878900 | -3.57139900 | -0.42524300 | O | 5.68314000   | -0.38239700 | -0.63094800 |
| H  | -2.18162200 | -3.30673100 | -0.25262900 | O | 9.18645500   | 0.24596900  | -1.39350600 |
| O  | -3.20619700 | -3.15615400 | 1.48069800  | O | 8.63400700   | 2.23996600  | 0.60969500  |
| H  | -4.07604900 | -2.88652800 | 1.80209500  | O | 6.43618400   | 1.15349500  | 1.79122300  |
| O  | -1.75570400 | 1.77420500  | 0.65976900  | C | 7.12313200   | -1.85593600 | -1.81081000 |
| H  | -2.25892700 | 2.40401400  | 1.21229000  | H | 8.03719800   | -1.92222600 | -2.39976100 |
| O  | 4.06853500  | 0.80714300  | 0.45517600  | H | 7.25615600   | -2.45899800 | -0.90189000 |
| C  | -7.42057200 | -0.12423100 | -0.52908700 | O | 6.07773200   | -2.37166800 | -2.61987900 |
| C  | -7.33182800 | -1.15479600 | -1.46445800 | H | 5.25289300   | -2.36935900 | -2.11587200 |
| C  | -8.65930600 | 0.43243500  | -0.20498000 | H | 9.83813100   | 0.79385400  | -0.93486000 |
| C  | -8.49589100 | -1.60777300 | -2.08914500 | H | 8.48332400   | 1.95633600  | 1.52328500  |
| H  | -6.38294200 | -1.62602600 | -1.68383800 | H | 5.57433500   | 1.05067700  | 2.21508600  |
| C  | -9.81039200 | -0.03617600 | -0.82787200 |   |              |             |             |

|    |             |             |             |   |              |             |             |
|----|-------------|-------------|-------------|---|--------------|-------------|-------------|
| M2 |             |             |             | H | -8.55904300  | -1.08927600 | -1.49397300 |
| C  | 2.61479700  | 1.15207200  | -0.21359500 | C | -9.93231700  | 0.69577900  | 1.06440700  |
| C  | 1.20740400  | 1.55805700  | 0.26165800  | H | -8.79654200  | 1.82170000  | 2.50325000  |
| C  | 0.13961600  | 0.54736400  | -0.19161200 | H | -10.77090900 | -0.50107400 | -0.52067400 |
| C  | 1.73811700  | -1.20044400 | -0.45023000 | H | -10.89352400 | 0.95238300  | 1.49665700  |
| C  | 2.90612600  | -0.33702000 | 0.04074000  | H | 3.06445800   | -0.50235700 | 1.11224900  |
| H  | 1.20606100  | 1.54014200  | 1.35485100  | N | -4.46894100  | -2.57857900 | -0.56601500 |
| H  | 2.67934300  | 1.31721700  | -1.29465500 | H | -4.54331100  | -3.09987500 | -1.42338600 |
| H  | 1.63095500  | -1.08251900 | -1.53837500 | C | -4.88887000  | -4.73685300 | 0.49244700  |
| H  | 0.00707900  | 0.56830300  | -1.27687600 | H | -4.09172700  | -5.32019600 | 0.95810900  |
| O  | 0.55485200  | -0.76322600 | 0.20651000  | H | -5.80435500  | -4.93151000 | 1.05469700  |
| O  | 3.53557800  | 1.99721400  | 0.46449300  | H | -5.02642200  | -5.08168300 | -0.53453500 |
| C  | 1.87886600  | -2.67832300 | -0.14037400 | N | 0.86802800   | 2.91865100  | -0.13357400 |
| H  | 1.87699400  | -2.82536200 | 0.94679600  | H | 0.78465000   | 3.60304300  | 0.59942600  |
| H  | 2.81944300  | -3.05675300 | -0.55488600 | C | 0.23717000   | 4.76570400  | -1.59020900 |
| H  | 4.43074300  | 1.70262500  | 0.23659000  | H | 0.60421700   | 5.14755000  | -2.54214700 |
| O  | 0.76021500  | -3.32959600 | -0.74241400 | H | -0.85672100  | 4.77988300  | -1.61096800 |
| H  | 0.71459900  | -4.24641200 | -0.45029100 | H | 0.57543000   | 5.42031500  | -0.78297500 |
| C  | -2.61519900 | -0.95351300 | -0.23958000 | C | 0.68877100   | 3.32896700  | -1.42539200 |
| C  | -4.07533900 | -1.17906600 | -0.68525900 | O | 0.83740400   | 2.57461900  | -2.37873100 |
| C  | -2.27414900 | 0.54585800  | -0.22361900 | C | -4.54865900  | -3.26174300 | 0.61042000  |
| H  | -2.47897700 | -1.34657800 | 0.77213000  | O | -4.37300400  | -2.73061100 | 1.70032400  |
| C  | -5.06938800 | -0.24009000 | 0.01413500  | C | 5.25455500   | -0.96343000 | 0.05328800  |
| H  | -4.12780800 | -0.93589000 | -1.74972500 | C | 6.29733600   | -1.56081700 | -0.90126700 |
| C  | -3.35363000 | 1.34403700  | 0.51879600  | H | 5.05557700   | -1.66897200 | 0.87770400  |
| H  | -2.19979100 | 0.91361500  | -1.25245700 | C | 6.90742600   | 0.14818700  | 1.38932400  |
| H  | -5.19085000 | -0.50348500 | 1.06969300  | C | 7.66292300   | -1.62855200 | -0.21183900 |
| H  | -3.38019600 | 1.02107700  | 1.57072200  | H | 5.97634700   | -2.57378400 | -1.17992300 |
| O  | -4.62182900 | 1.10570500  | -0.09856200 | C | 8.03698600   | -0.29934600 | 0.46116500  |
| O  | -6.28617900 | -0.34720200 | -0.66629100 | H | 6.75285400   | -0.60458500 | 2.17531800  |
| O  | -1.04811200 | 0.82939600  | 0.46674400  | H | 7.63474200   | -2.39913100 | 0.56564600  |
| C  | -3.14253600 | 2.85307300  | 0.48679400  | H | 8.18138700   | 0.46515800  | -0.31422600 |
| H  | -3.94332400 | 3.32852300  | 1.06732600  | O | 5.70462800   | 0.26320600  | 0.60601900  |
| H  | -2.18762600 | 3.09659700  | 0.95038500  | O | 9.21612800   | -0.45332200 | 1.23550000  |
| O  | -3.09796800 | 3.37871300  | -0.83242100 | O | 8.68264100   | -2.03565200 | -1.11507700 |
| H  | -3.92882100 | 3.15834300  | -1.27340100 | O | 6.47069800   | -0.76471100 | -2.06441100 |
| O  | -1.82205400 | -1.67693300 | -1.17095500 | C | 7.12643900   | 1.49957700  | 2.05292600  |
| H  | -1.00262800 | -1.98830900 | -0.75732800 | H | 8.04655600   | 1.46465600  | 2.63509400  |
| O  | 4.09878900  | -0.71923800 | -0.68497700 | H | 7.23889000   | 2.27267600  | 1.28031700  |
| C  | -7.45493900 | 0.03380800  | -0.04249500 | O | 6.08288800   | 1.82410200  | 2.95728500  |
| C  | -7.51266100 | 0.86143700  | 1.07916100  | H | 5.25486500   | 1.92961800  | 2.46978300  |
| C  | -8.63055400 | -0.45194700 | -0.61949600 | H | 9.87816700   | -0.88752500 | 0.68031000  |
| C  | -8.75560400 | 1.17940000  | 1.62918900  | H | 8.53511800   | -1.57500300 | -1.95401300 |
| H  | -6.60843500 | 1.27528600  | 1.50573600  | H | 5.60749900   | -0.58227600 | -2.45758900 |
| C  | -9.86201500 | -0.11824100 | -0.06740900 |   |              |             |             |

|    |             |             |             |   |              |             |             |
|----|-------------|-------------|-------------|---|--------------|-------------|-------------|
| M3 |             |             |             | H | -8.39449500  | -1.61166300 | -1.65013600 |
| C  | 2.61532400  | 1.18986000  | 0.23542100  | C | -9.95755500  | 0.96800700  | -0.06312700 |
| C  | 1.19678200  | 1.35905100  | 0.81827000  | H | -8.94303000  | 2.47551900  | 1.08821600  |
| C  | 0.13074700  | 0.74323600  | -0.10112900 | H | -10.66380500 | -0.66505300 | -1.28064800 |
| C  | 1.72624500  | -0.71113800 | -1.16516200 | H | -10.94506700 | 1.38410100  | 0.10477700  |
| C  | 2.88171500  | -0.23501100 | -0.27997400 | H | 3.00278500   | -0.91764600 | 0.56853600  |
| H  | 1.15167200  | 0.79442400  | 1.75296800  | N | -4.52345900  | -2.76778800 | 0.34478400  |
| H  | 2.72537100  | 1.86705200  | -0.61801800 | H | -4.53891600  | -3.56011100 | -0.27534000 |
| H  | 1.64798900  | -0.07070400 | -2.05378800 | C | -5.14210700  | -4.40282100 | 2.04839200  |
| H  | 0.02905000  | 1.29450800  | -1.04206800 | H | -4.35612800  | -4.81259100 | 2.68720600  |
| O  | 0.52777900  | -0.60379600 | -0.39192500 | H | -6.06160600  | -4.38074300 | 2.63545600  |
| O  | 3.51665900  | 1.56151600  | 1.27102300  | H | -5.28158600  | -5.06847900 | 1.19405600  |
| C  | 1.81612400  | -2.16542600 | -1.61194600 | N | 0.91652400   | 2.74798300  | 1.16358100  |
| H  | 1.86353200  | -2.81574200 | -0.72600800 | H | 0.90631900   | 2.97326900  | 2.14485300  |
| H  | 2.72650200  | -2.31413400 | -2.19374400 | C | 0.81266500   | 5.16943300  | 0.86690600  |
| H  | 4.41668500  | 1.36859400  | 0.96491200  | H | 1.79173600   | 5.65550600  | 0.84325900  |
| O  | 0.74099100  | -2.53044100 | -2.45626400 | H | 0.13895900   | 5.76001500  | 0.24549900  |
| H  | -0.09271100 | -2.44571100 | -1.97211300 | H | 0.44950700   | 5.17315800  | 1.89685900  |
| C  | -2.66711200 | -1.11790000 | 0.32414900  | C | 0.94393500   | 3.78143900  | 0.26855400  |
| C  | -4.05254600 | -1.50579000 | -0.21462200 | O | 1.06971700   | 3.60431900  | -0.93515500 |
| C  | -2.23567600 | 0.27058700  | -0.16218100 | C | -4.76983600  | -2.98151800 | 1.66992500  |
| H  | -2.70713900 | -1.08834900 | 1.41822000  | O | -4.69967700  | -2.09063300 | 2.50712900  |
| C  | -5.07154300 | -0.37000000 | -0.02360100 | C | 5.21498500   | -0.85593900 | -0.52607600 |
| H  | -3.96382500 | -1.65955700 | -1.29324300 | C | 6.29791900   | -0.89263000 | -1.61210700 |
| C  | -3.34665500 | 1.30183400  | 0.07043800  | H | 4.97534200   | -1.88194800 | -0.20046800 |
| H  | -1.99569100 | 0.23951100  | -1.22862600 | C | 6.80791900   | -0.64509600 | 1.25682400  |
| H  | -5.32133700 | -0.23629400 | 1.03356000  | C | 7.63030100   | -1.34612000 | -1.00813800 |
| H  | -3.50377200 | 1.42709800  | 1.15223200  | H | 5.98711600   | -1.60028900 | -2.39228000 |
| O  | -4.54910800 | 0.84166400  | -0.55596000 | C | 7.97700100   | -0.57413500 | 0.27420900  |
| O  | -6.20505800 | -0.70814300 | -0.76557600 | H | 6.61570600   | -1.69212400 | 1.53035800  |
| O  | -1.07319200 | 0.68341500  | 0.58986100  | H | 7.56453900   | -2.40823200 | -0.75007000 |
| C  | -3.05445100 | 2.66286500  | -0.55272500 | H | 8.16144700   | 0.47821200  | 0.01922500  |
| H  | -3.86469200 | 3.35258100  | -0.28416000 | O | 5.64116800   | -0.10921600 | 0.60322300  |
| H  | -2.12027200 | 3.06034900  | -0.15612800 | O | 9.11820800   | -1.14224900 | 0.89731200  |
| O  | -2.89841200 | 2.58689300  | -1.95995800 | O | 8.69000800   | -1.24720200 | -1.95030900 |
| H  | -3.72075100 | 2.24442600  | -2.33403100 | O | 6.52724700   | 0.39085200  | -2.17558400 |
| O  | -1.76630900 | -2.13941900 | -0.09642900 | C | 7.00145800   | 0.16102400  | 2.53268300  |
| H  | -0.87233200 | -1.85105300 | 0.14390300  | H | 7.88997800   | -0.19973300 | 3.04946400  |
| O  | 4.09352000  | -0.23072200 | -1.06850900 | H | 7.15913400   | 1.21796000  | 2.27712000  |
| C  | -7.41313600 | -0.10126600 | -0.49102100 | O | 5.91504700   | 0.00631400  | 3.43184200  |
| C  | -7.55748500 | 1.05510500  | 0.27560800  | H | 5.11489800   | 0.37569300  | 3.03520500  |
| C  | -8.53351900 | -0.71668600 | -1.05377500 | H | 9.80221300   | -1.24398100 | 0.22127900  |
| C  | -8.83460900 | 1.57663300  | 0.48959000  | H | 8.57937000   | -0.41498600 | -2.43297600 |
| H  | -6.69216700 | 1.56178400  | 0.68182300  | H | 5.68681600   | 0.76482300  | -2.46974800 |
| C  | -9.79813900 | -0.18027300 | -0.84066800 |   |              |             |             |



|    |             |             |             |   |              |             |             |
|----|-------------|-------------|-------------|---|--------------|-------------|-------------|
| M4 |             |             |             | H | -8.45906900  | -1.64190700 | -0.73790300 |
| C  | 2.55578300  | 1.35011300  | -0.24167600 | C | -9.40311500  | -0.50173700 | 2.33144700  |
| C  | 1.17934200  | 1.95845600  | 0.10610100  | H | -8.14791100  | 0.66608000  | 3.63059800  |
| C  | 0.03473900  | 1.09021200  | -0.44084400 | H | -10.40427700 | -1.65380000 | 0.80885100  |
| C  | 1.38900700  | -0.85634400 | -0.56643500 | H | -10.24769000 | -0.50563000 | 3.01190200  |
| C  | 2.62610700  | -0.16806500 | 0.01654100  | H | 2.68262200   | -0.35673500 | 1.09436300  |
| H  | 1.07664400  | 1.94960300  | 1.19431000  | N | -4.13530100  | -2.25597400 | -1.15817500 |
| H  | 2.74110600  | 1.50193900  | -1.31067700 | H | -4.91703100  | -2.52222000 | -1.73501200 |
| H  | 1.37380500  | -0.70603400 | -1.65630400 | C | -3.88855000  | -4.66652300 | -0.98722800 |
| H  | 0.00304800  | 1.09233700  | -1.53294400 | H | -3.08869000  | -5.14214800 | -1.55998500 |
| O  | 0.25552300  | -0.24140400 | 0.02572700  | H | -4.03711800  | -5.25671900 | -0.08157600 |
| O  | 3.51875000  | 2.06618600  | 0.52364800  | H | -4.80363400  | -4.68920700 | -1.58209000 |
| C  | 1.25923700  | -2.34914800 | -0.29322000 | N | 1.08522600   | 3.35392400  | -0.30609600 |
| H  | 1.19812900  | -2.52590900 | 0.78608000  | H | 1.10631100   | 4.04546600  | 0.42453400  |
| H  | 2.13278200  | -2.87621500 | -0.68495600 | C | 1.08646100   | 5.28823500  | -1.79598800 |
| H  | 4.38215000  | 1.65142700  | 0.37274900  | H | 1.94369000   | 5.59836200  | -2.39630800 |
| O  | 0.10092800  | -2.85277200 | -0.95568800 | H | 0.18488800   | 5.53163100  | -2.36238900 |
| H  | -0.60257500 | -3.07922800 | -0.32506400 | H | 1.07951500   | 5.85901400  | -0.86501100 |
| C  | -2.49674400 | -0.38341300 | -0.77969200 | C | 1.14552600   | 3.78461400  | -1.60011900 |
| C  | -3.95592800 | -0.80798600 | -1.02613600 | O | 1.22456200   | 3.01572000  | -2.54930700 |
| C  | -2.39232800 | 1.13554900  | -0.54429400 | C | -3.43515300  | -3.27255400 | -0.59311800 |
| H  | -2.11848200 | -0.88690100 | 0.10663600  | O | -2.48381200  | -3.12109500 | 0.17498300  |
| C  | -4.89936300 | -0.22451200 | 0.03064600  | C | 4.85856300   | -1.10465300 | 0.19741200  |
| H  | -4.26392400 | -0.37679400 | -1.98388200 | C | 5.88608300   | -1.82879800 | -0.68284400 |
| C  | -3.47290500 | 1.64661800  | 0.42336300  | H | 4.50079000   | -1.78262900 | 0.99052500  |
| H  | -2.47335300 | 1.65470900  | -1.50527300 | C | 6.53454300   | -0.23222200 | 1.67761900  |
| H  | -4.68129000 | -0.63039100 | 1.02987400  | C | 7.17369300   | -2.07927400 | 0.10689000  |
| H  | -3.23056900 | 1.27731400  | 1.43096700  | H | 5.45691100   | -2.78833600 | -1.00137900 |
| O  | -4.77419600 | 1.18432500  | 0.04238800  | C | 7.66411600   | -0.81481900 | 0.82826800  |
| O  | -6.20778700 | -0.54700600 | -0.34805200 | H | 6.22341100   | -0.96627700 | 2.43444200  |
| O  | -1.16688400 | 1.52716800  | 0.10378100  | H | 6.98577300   | -2.84482500 | 0.86689100  |
| C  | -3.57345700 | 3.16811300  | 0.47132500  | H | 7.96329500   | -0.06941000 | 0.07917000  |
| H  | -4.28814000 | 3.44794600  | 1.25628000  | O | 5.42196600   | 0.04792300  | 0.80778900  |
| H  | -2.60039000 | 3.58861400  | 0.72216800  | O | 8.75302100   | -1.12689600 | 1.68341200  |
| O  | -3.95009000 | 3.72849400  | -0.77619000 | O | 8.19949400   | -2.60903100 | -0.72327100 |
| H  | -4.80639900 | 3.35799900  | -1.02610100 | O | 6.25191600   | -1.05512500 | -1.81665200 |
| O  | -1.74111100 | -0.75402700 | -1.92282400 | C | 6.87641600   | 1.07222400  | 2.38170300  |
| H  | -1.09662400 | -1.44063700 | -1.67877100 | H | 7.73604100   | 0.91164500  | 3.03127600  |
| O  | 3.81053100  | -0.70065700 | -0.62429200 | H | 7.14835600   | 1.83038200  | 1.63430600  |
| C  | -7.22590200 | -0.49030300 | 0.58339700  | O | 5.81694800   | 1.52450400  | 3.21003400  |
| C  | -7.13215600 | 0.17045700  | 1.80840900  | H | 5.04568400   | 1.72604100  | 2.66326600  |
| C  | -8.40687100 | -1.14297100 | 0.22365700  | H | 9.38981800   | -1.64292500 | 1.17020600  |
| C  | -8.22408700 | 0.15139200  | 2.67811100  | H | 8.17179700   | -2.13274300 | -1.56599800 |
| H  | -6.23798400 | 0.71829700  | 2.07484100  | H | 5.45197400   | -0.75709700 | -2.26873100 |
| C  | -9.48988200 | -1.14436200 | 1.09539400  |   |              |             |             |

|    |             |             |             |   |              |             |             |
|----|-------------|-------------|-------------|---|--------------|-------------|-------------|
| M5 |             |             |             | H | -8.69244800  | 1.21039900  | 0.50189500  |
| C  | 2.59459600  | -1.12255800 | 0.50655400  | C | -9.69747100  | -1.01341400 | -1.87763800 |
| C  | 1.20532400  | -1.63437700 | 0.07862200  | H | -8.37358800  | -2.33477500 | -2.93966600 |
| C  | 0.13746400  | -0.53919800 | 0.25515600  | H | -10.74917800 | 0.40527100  | -0.64076700 |
| C  | 1.72865500  | 1.21119100  | 0.18962900  | H | -10.59073900 | -1.36835700 | -2.37993600 |
| C  | 2.90978600  | 0.27262000  | -0.06686900 | H | 3.08663300   | 0.19523000  | -1.14565900 |
| H  | 1.24342600  | -1.85297100 | -0.99232000 | N | -4.52424600  | 2.55869800  | -0.06799000 |
| H  | 2.61758800  | -1.03607600 | 1.59854500  | H | -5.23166500  | 2.62973900  | -0.78369000 |
| H  | 1.56081500  | 1.30265400  | 1.27208100  | C | -5.04741900  | 4.91354500  | 0.34631100  |
| H  | -0.02699900 | -0.30633900 | 1.30908800  | H | -5.75955600  | 5.16378800  | 1.13629300  |
| O  | 0.58678400  | 0.61684300  | -0.42959500 | H | -4.32448800  | 5.72860400  | 0.28942200  |
| O  | 3.54085700  | -2.10271400 | 0.08394000  | H | -5.58313600  | 4.84397200  | -0.60233400 |
| C  | 1.82356700  | 2.60916600  | -0.39996500 | N | 0.84961100   | -2.88464300 | 0.74178600  |
| H  | 1.91963100  | 2.53043100  | -1.49394400 | H | 0.98147900   | -3.72952400 | 0.21063000  |
| H  | 2.70384100  | 3.12549700  | -0.01083300 | C | 0.22850200   | -4.40661200 | 2.54336400  |
| H  | 4.42124300  | -1.77049400 | 0.31413700  | H | 0.61939400   | -4.55179200 | 3.55027000  |
| O  | 0.69195900  | 3.38131100  | -0.04617700 | H | -0.86114900  | -4.49124700 | 2.58683400  |
| H  | -0.09328800 | 2.80611700  | -0.02700800 | H | 0.61145400   | -5.19455900 | 1.89018300  |
| C  | -2.62512900 | 0.92647600  | -0.02523500 | C | 0.57522300   | -3.00593000 | 2.07641500  |
| C  | -4.10170300 | 1.21308100  | 0.32684200  | O | 0.55483600   | -2.04666600 | 2.83543800  |
| C  | -2.27963800 | -0.55200800 | 0.24601900  | C | -4.32269700  | 3.64376000  | 0.73181400  |
| H  | -2.47305900 | 1.11732200  | -1.09632500 | O | -3.58396900  | 3.59526800  | 1.71192200  |
| C  | -5.02068900 | 0.17856400  | -0.33248000 | C | 5.21845600   | 0.90839800  | -0.20160600 |
| H  | -4.23387700 | 1.11877000  | 1.40995000  | C | 6.32169400   | 1.65612000  | 0.54812500  |
| C  | -3.32501800 | -1.49003200 | -0.37415700 | H | 4.99177500   | 1.45385900  | -1.13452400 |
| H  | -2.23668600 | -0.71647300 | 1.32789300  | C | 6.76651100   | -0.41511400 | -1.47172600 |
| H  | -4.97382100 | 0.25855100  | -1.43260100 | C | 7.58025300   | 1.66150200  | -0.33111700 |
| H  | -3.26056100 | -1.41184700 | -1.47057200 | H | 5.99467600   | 2.69307600  | 0.70497200  |
| O  | -4.64353700 | -1.12228800 | 0.05550600  | C | 7.96508600   | 0.24969100  | -0.77837900 |
| O  | -6.32301200 | 0.42404500  | 0.10727700  | H | 6.50530400   | 0.15344900  | -2.37658200 |
| O  | -1.04857200 | -0.95847600 | -0.35148300 | H | 7.39073200   | 2.26276500  | -1.23257100 |
| C  | -3.14522100 | -2.95456000 | 0.00910500  | H | 8.24415400   | -0.33577100 | 0.10440900  |
| H  | -3.89751800 | -3.54955900 | -0.52481100 | O | 5.66189400   | -0.40157300 | -0.56287600 |
| H  | -2.15538600 | -3.28474100 | -0.30206000 | O | 9.09246700   | 0.41311600  | -1.64821000 |
| O  | -3.22383700 | -3.17841200 | 1.40772100  | O | 8.61584100   | 2.26160400  | 0.43595000  |
| H  | -4.09758200 | -2.90574400 | 1.71575800  | O | 6.56946800   | 1.01812700  | 1.78368300  |
| O  | -1.74762500 | 1.77659000  | 0.70233000  | C | 6.96608000   | -1.87680800 | -1.85363200 |
| H  | -2.25566000 | 2.39130900  | 1.26651500  | H | 7.78146000   | -1.96558300 | -2.57468600 |
| O  | 4.08928900  | 0.78654300  | 0.58526700  | H | 7.23382800   | -2.45242500 | -0.95529900 |
| C  | -7.39706400 | -0.10398000 | -0.58642500 | O | 5.82299600   | -2.42072300 | -2.48595200 |
| C  | -7.29642900 | -1.10943700 | -1.54771500 | H | 5.06634800   | -2.35790600 | -1.88448900 |
| C  | -8.64117200 | 0.43815200  | -0.25768700 | H | 9.61936200   | -0.39313600 | -1.66605900 |
| C  | -8.45351300 | -1.55123400 | -2.19303100 | H | 9.44032700   | 2.17598600  | -0.06055500 |
| H  | -6.34369200 | -1.57049100 | -1.77188300 | H | 7.35913600   | 1.42734000  | 2.16308200  |
| C  | -9.78516700 | -0.01924900 | -0.90150700 |   |              |             |             |

|    |             |             |             |   |              |             |             |
|----|-------------|-------------|-------------|---|--------------|-------------|-------------|
| M6 |             |             |             | H | -8.57308700  | -1.11451200 | -1.38107100 |
| C  | 2.61980700  | 1.19794800  | -0.35500400 | C | -9.88253100  | 0.61401400  | 1.24873300  |
| C  | 1.22113000  | 1.57965300  | 0.16163400  | H | -8.71269700  | 1.72552300  | 2.67147900  |
| C  | 0.15167400  | 0.57304200  | -0.29965600 | H | -10.75912500 | -0.56299700 | -0.33065700 |
| C  | 1.76818300  | -1.14855300 | -0.63979400 | H | -10.83220400 | 0.85431200  | 1.71461500  |
| C  | 2.92889000  | -0.29120300 | -0.12160400 | H | 3.06738300   | -0.47260500 | 0.95060200  |
| H  | 1.24190500  | 1.52743900  | 1.25382900  | N | -4.44753100  | -2.58594800 | -0.61066400 |
| H  | 2.66173400  | 1.37641000  | -1.43455000 | H | -4.51225400  | -3.09425000 | -1.47664900 |
| H  | 1.65251300  | -0.99082300 | -1.72150300 | C | -4.81356400  | -4.77210200 | 0.40922600  |
| H  | -0.00801400 | 0.63160900  | -1.37979300 | H | -3.99307700  | -5.35039300 | 0.83947400  |
| O  | 0.58350600  | -0.74735700 | 0.04238900  | H | -5.70967900  | -4.99717600 | 0.99090100  |
| O  | 3.54964800  | 2.04762200  | 0.31023500  | H | -4.97214300  | -5.09567000 | -0.62161800 |
| C  | 1.92739900  | -2.63467500 | -0.38696400 | N | 0.86035100   | 2.94929100  | -0.18118200 |
| H  | 1.94900500  | -2.82269200 | 0.69402400  | H | 0.81927500   | 3.61494300  | 0.57230800  |
| H  | 2.86276800  | -2.98544800 | -0.83551100 | C | 0.18519000   | 4.84140400  | -1.55953800 |
| H  | 4.43569300  | 1.79939200  | 0.00840900  | H | 0.54048000   | 5.25613100  | -2.50225900 |
| O  | 0.80223900  | -3.27527000 | -0.98903900 | H | -0.90878100  | 4.85765600  | -1.56696200 |
| H  | 0.78625800  | -4.20815400 | -0.74967300 | H | 0.53461300   | 5.46720100  | -0.73436200 |
| C  | -2.59662800 | -0.95506000 | -0.29957600 | C | 0.63567600   | 3.39827700  | -1.45318100 |
| C  | -4.06699600 | -1.18101200 | -0.70934800 | O | 0.74310500   | 2.67304200  | -2.43329500 |
| C  | -2.26343900 | 0.54604700  | -0.26522700 | C | -4.49770400  | -3.29370100 | 0.55276700  |
| H  | -2.43100700 | -1.36526000 | 0.70129000  | O | -4.31606700  | -2.78229900 | 1.65108900  |
| C  | -5.04668400 | -0.26407900 | 0.03744400  | C | 5.24706500   | -0.92403100 | -0.06739400 |
| H  | -4.15071600 | -0.91511600 | -1.76636900 | C | 6.37875700   | -1.47025000 | -0.93990600 |
| C  | -3.32675500 | 1.32246100  | 0.52257900  | H | 5.01070900   | -1.67045000 | 0.71206200  |
| H  | -2.21918100 | 0.93331100  | -1.28867400 | C | 6.74180300   | 0.09508100  | 1.50657600  |
| H  | -5.13596300 | -0.54931400 | 1.09039900  | C | 7.62122000   | -1.65233200 | -0.05528600 |
| H  | -3.31977600 | 0.97941200  | 1.56842300  | H | 6.07631300   | -2.45205200 | -1.33038200 |
| O  | -4.61163200 | 1.08679500  | -0.06109700 | C | 7.96790300   | -0.37219800 | 0.70891600  |
| O  | -6.28243700 | -0.36641100 | -0.60968600 | H | 6.47360700   | -0.67114500 | 2.24886400  |
| O  | -1.02181900 | 0.82356500  | 0.39806600  | H | 7.42881300   | -2.44464500 | 0.68336900  |
| C  | -3.12806400 | 2.83353700  | 0.51327100  | H | 8.25000500   | 0.40401700  | -0.01076500 |
| H  | -3.90619000 | 3.29064900  | 1.13803000  | O | 5.65795200   | 0.27223600  | 0.58925400  |
| H  | -2.15516200 | 3.07448300  | 0.93919500  | O | 9.08134100   | -0.71119800 | 1.54416200  |
| O  | -3.14563800 | 3.38606600  | -0.79519200 | O | 8.68172900   | -2.04639000 | -0.91545000 |
| H  | -3.98701600 | 3.15304200  | -1.20899000 | O | 6.63691600   | -0.57098100 | -1.99675700 |
| O  | -1.82876100 | -1.65952400 | -1.26478600 | C | 6.89543700   | 1.43283200  | 2.22065000  |
| H  | -0.97966700 | -1.94180800 | -0.89106100 | H | 7.69112000   | 1.36837100  | 2.96589300  |
| O  | 4.13076300  | -0.64422500 | -0.83641500 | H | 7.16975100   | 2.20571300  | 1.48763500  |
| C  | -7.43456300 | -0.00638900 | 0.05516500  | O | 5.72408900   | 1.79135000  | 2.92776400  |
| C  | -7.46511500 | 0.80150000  | 1.19225800  | H | 4.98605000   | 1.87136800  | 2.30524400  |
| C  | -8.62332700 | -0.49252900 | -0.49415400 | H | 9.59108600   | 0.07782600  | 1.75792500  |
| C  | -8.69316400 | 1.09855200  | 1.78559700  | H | 9.49697400   | -2.05685500 | -0.39671800 |
| H  | -6.55150900 | 1.21585600  | 1.59778100  | H | 7.45247100   | -0.86229800 | -2.42722700 |
| C  | -9.84001800 | -0.17966100 | 0.10115500  |   |              |             |             |

|    |             |             |             |   |              |             |             |
|----|-------------|-------------|-------------|---|--------------|-------------|-------------|
| M7 |             |             |             | H | -8.38828900  | -1.67016600 | -1.56720500 |
| C  | 2.61738700  | 1.29741100  | 0.12095200  | C | -9.95303600  | 0.83198200  | 0.13791200  |
| C  | 1.20678900  | 1.43354300  | 0.72857700  | H | -8.93313600  | 2.33465400  | 1.29083900  |
| C  | 0.13954100  | 0.80636800  | -0.18312800 | H | -10.66436700 | -0.78712200 | -1.09531200 |
| C  | 1.75686900  | -0.60956000 | -1.27415300 | H | -10.94325200 | 1.22023600  | 0.35070400  |
| C  | 2.90421400  | -0.12876000 | -0.38058900 | H | 3.00787300   | -0.80520000 | 0.47586200  |
| H  | 1.18557000  | 0.85662200  | 1.65699700  | N | -4.44048500  | -2.79690900 | 0.25655400  |
| H  | 2.70141400  | 1.96728100  | -0.74076900 | H | -4.43566600  | -3.57093600 | -0.38646400 |
| H  | 1.66959200  | 0.04070300  | -2.15421800 | C | -4.98541200  | -4.50298200 | 1.91465800  |
| H  | 0.01274800  | 1.36818500  | -1.11439000 | H | -4.17809300  | -4.90990600 | 2.52819500  |
| O  | 0.55515300  | -0.52944200 | -0.49761300 | H | -5.89596900  | -4.52666600 | 2.51546600  |
| O  | 3.53022500  | 1.70378800  | 1.13664200  | H | -5.11905000  | -5.14476400 | 1.04128300  |
| C  | 1.87018500  | -2.05574600 | -1.73907800 | N | 0.90271400   | 2.81164300  | 1.09720100  |
| H  | 1.93087900  | -2.71694900 | -0.86180400 | H | 0.93618900   | 3.02923600  | 2.07970400  |
| H  | 2.78185000  | -2.17806700 | -2.32462300 | C | 0.74695300   | 5.23396300  | 0.83027300  |
| H  | 4.42568000  | 1.58272000  | 0.78707300  | H | 1.71622200   | 5.73659800  | 0.77271900  |
| O  | 0.80018700  | -2.43194100 | -2.58636100 | H | 0.03937100   | 5.81927800  | 0.24243600  |
| H  | -0.03475900 | -2.35842100 | -2.10304700 | H | 0.42506500   | 5.22126600  | 1.87389700  |
| C  | -2.61905400 | -1.10817500 | 0.25359500  | C | 0.87743700   | 3.85410200  | 0.21213600  |
| C  | -4.00715900 | -1.50712900 | -0.26923300 | O | 0.95606700   | 3.69126100  | -0.99683300 |
| C  | -2.22202400 | 0.29880200  | -0.20949900 | C | -4.65990000  | -3.05973000 | 1.57734200  |
| H  | -2.63995100 | -1.10304100 | 1.34885400  | O | -4.60335200  | -2.19500000 | 2.44249800  |
| C  | -5.04185800 | -0.39795100 | -0.01779300 | C | 5.20891700   | -0.77079500 | -0.58393200 |
| H  | -3.93922000 | -1.62335400 | -1.35406600 | C | 6.37183100   | -0.83644700 | -1.57520400 |
| C  | -3.34524500 | 1.30454900  | 0.07247100  | H | 4.93894600   | -1.79896500 | -0.28501700 |
| H  | -2.00476000 | 0.29616200  | -1.28137600 | C | 6.64517300   | -0.68880600 | 1.33709100  |
| H  | -5.26386300 | -0.29894300 | 1.04935500  | C | 7.58077500   | -1.45448900 | -0.85647700 |
| H  | -3.47491900 | 1.40469000  | 1.16049600  | H | 6.08328000   | -1.49070300 | -2.40943600 |
| O  | -4.55713200 | 0.83744800  | -0.53071600 | C | 7.89916000   | -0.72666600 | 0.45207400  |
| O  | -6.19049500 | -0.73666500 | -0.73648900 | H | 6.34841400   | -1.71524100 | 1.59793000  |
| O  | -1.05250100 | 0.71623800  | 0.52707300  | H | 7.36158700   | -2.50498000 | -0.61427700 |
| C  | -3.09425800 | 2.68320000  | -0.52993700 | H | 8.21013100   | 0.29766000  | 0.21951300  |
| H  | -3.90368400 | 3.35517600  | -0.21692000 | O | 5.59500800   | -0.06324800 | 0.59217700  |
| H  | -2.15162700 | 3.08490000  | -0.15862500 | O | 8.97850800   | -1.45663900 | 1.04686800  |
| O  | -2.98939200 | 2.63985200  | -1.94305800 | O | 8.67210300   | -1.38923400 | -1.76409100 |
| H  | -3.81654500 | 2.28343400  | -2.29275900 | O | 6.66819900   | 0.46356400  | -2.03944300 |
| O  | -1.70838800 | -2.10334600 | -0.20471900 | C | 6.77610200   | 0.12447900  | 2.61963000  |
| H  | -0.81396400 | -1.79530300 | 0.01038700  | H | 7.54022900   | -0.31573600 | 3.26357300  |
| O  | 4.12360800  | -0.12072200 | -1.14772300 | H | 7.08417000   | 1.15010900  | 2.36842000  |
| C  | -7.40141500 | -0.16577200 | -0.40519400 | O | 5.57874500   | 0.12131800  | 3.37320300  |
| C  | -7.54501600 | 0.96797800  | 0.39476300  | H | 4.86839100   | 0.51495600  | 2.84532600  |
| C  | -8.52674300 | -0.79340100 | -0.94424500 | H | 9.48506800   | -0.88534500 | 1.63429400  |
| C  | -8.82538800 | 1.45340400  | 0.66638500  | H | 9.46612000   | -1.68056400 | -1.29684800 |
| H  | -6.67739400 | 1.48472500  | 0.78307400  | H | 7.49284200   | 0.40705100  | -2.54141800 |
| C  | -9.79500100 | -0.29274800 | -0.67363400 |   |              |             |             |

|    |             |             |             |   |              |             |             |
|----|-------------|-------------|-------------|---|--------------|-------------|-------------|
| M8 |             |             |             | H | -8.42976400  | -1.67528000 | -0.66765600 |
| C  | 2.56528500  | 1.39881600  | -0.34753900 | C | -9.29105800  | -0.65965800 | 2.46912900  |
| C  | 1.19557700  | 1.98558800  | 0.05625000  | H | -8.00894000  | 0.47472300  | 3.77172600  |
| C  | 0.04449000  | 1.13148300  | -0.50127900 | H | -10.32597800 | -1.76739100 | 0.93624500  |
| C  | 1.41295300  | -0.79739400 | -0.72915800 | H | -10.11420700 | -0.69856200 | 3.17433100  |
| C  | 2.65009700  | -0.12514300 | -0.12743500 | H | 2.69542500   | -0.33888500 | 0.94678000  |
| H  | 1.11531700  | 1.93075800  | 1.14525400  | N | -4.11382500  | -2.21809800 | -1.25352300 |
| H  | 2.72414600  | 1.57861300  | -1.41597800 | H | -4.89299000  | -2.46910000 | -1.84037100 |
| H  | 1.38426300  | -0.59981800 | -1.81077400 | C | -3.83217900  | -4.63032000 | -1.19053700 |
| H  | -0.01109500 | 1.18017100  | -1.59120500 | H | -3.03049900  | -5.06673500 | -1.79129900 |
| O  | 0.28116100  | -0.21656700 | -0.09621200 | H | -3.96337500  | -5.26310000 | -0.31135300 |
| O  | 3.54806700  | 2.10409000  | 0.40785800  | H | -4.75228400  | -4.64016900 | -1.77802000 |
| C  | 1.29777400  | -2.30111900 | -0.51931400 | N | 1.08300100   | 3.39713500  | -0.29282700 |
| H  | 1.27204000  | -2.52824900 | 0.55217000  | H | 1.14688800   | 4.05654300  | 0.46454000  |
| H  | 2.16055600  | -2.80285600 | -0.96372200 | C | 1.04524700   | 5.39534400  | -1.69596600 |
| H  | 4.41123500  | 1.73223000  | 0.17388300  | H | 1.90231800   | 5.72697000  | -2.28532100 |
| O  | 0.12029500  | -2.78444900 | -1.16543700 | H | 0.14331900   | 5.66914700  | -2.24735600 |
| H  | -0.56327700 | -3.03147100 | -0.52133000 | H | 1.04589000   | 5.92413700  | -0.74035800 |
| C  | -2.48390000 | -0.34746200 | -0.83890700 | C | 1.09645900   | 3.88360800  | -1.56860000 |
| C  | -3.94614300 | -0.77557200 | -1.06236000 | O | 1.13095400   | 3.15791200  | -2.55290100 |
| C  | -2.38547500 | 1.16158100  | -0.54379100 | C | -3.39615900  | -3.24860600 | -0.73750200 |
| H  | -2.07803900 | -0.88319200 | 0.01571500  | O | -2.44278700  | -3.11736600 | 0.03148100  |
| C  | -4.86304200 | -0.24765500 | 0.04548000  | C | 4.84682100   | -1.07439000 | 0.05867200  |
| H  | -4.28557900 | -0.30665900 | -1.99122300 | C | 5.95051700   | -1.76117200 | -0.74753800 |
| C  | -3.44318100 | 1.62142700  | 0.47365900  | H | 4.45477500   | -1.79033800 | 0.80301200  |
| H  | -2.49719600 | 1.71848800  | -1.48028000 | C | 6.35409500   | -0.29636300 | 1.75561500  |
| H  | -4.61096000 | -0.69300500 | 1.01951700  | C | 7.08868800   | -2.12966900 | 0.21561800  |
| H  | -3.16750000 | 1.21422300  | 1.45778900  | H | 5.54201000   | -2.68391400 | -1.18229700 |
| O  | -4.75108600 | 1.16078600  | 0.11293100  | C | 7.55587000   | -0.92347600 | 1.03408600  |
| O  | -6.17996000 | -0.56761900 | -0.30629100 | H | 5.92829700   | -1.02595700 | 2.46022300  |
| O  | -1.14763800 | 1.53836400  | 0.08799000  | H | 6.73438000   | -2.89797700 | 0.91876000  |
| C  | -3.55755800 | 3.13846800  | 0.58756800  | H | 7.99812700   | -0.18559700 | 0.35578100  |
| H  | -4.24524700 | 3.37791200  | 1.40932200  | O | 5.37442400   | 0.04439600  | 0.77049500  |
| H  | -2.57994900 | 3.55960300  | 0.81891600  | O | 8.54630400   | -1.43062200 | 1.93719900  |
| O  | -3.98704200 | 3.74476900  | -0.62083000 | O | 8.14348900   | -2.65723800 | -0.57779700 |
| H  | -4.84402900 | 3.36745700  | -0.85797000 | O | 6.40581200   | -0.89044500 | -1.76139800 |
| O  | -1.75812000 | -0.66633000 | -2.01594900 | C | 6.64475700   | 0.99611600  | 2.50871600  |
| H  | -1.09408500 | -1.34807600 | -1.81389800 | H | 7.37198800   | 0.80998800  | 3.30196500  |
| O  | 3.83745900  | -0.62886100 | -0.77466400 | H | 7.07269200   | 1.73257300  | 1.81268400  |
| C  | -7.16873300 | -0.55831200 | 0.65704200  | O | 5.49100400   | 1.50740200  | 3.14835600  |
| C  | -7.04463600 | 0.05818300  | 1.90240200  | H | 4.81153300   | 1.69403400  | 2.48348500  |
| C  | -8.35325400 | -1.21156000 | 0.30977300  | H | 9.14978700   | -0.72721800 | 2.19974000  |
| C  | -8.10898000 | -0.00559600 | 2.80358700  | H | 8.90761500   | -2.79431500 | -0.00245600 |
| H  | -6.14863700 | 0.60679300  | 2.16091700  | H | 7.19475200   | -1.29189800 | -2.15068300 |
| C  | -9.40877500 | -1.25775400 | 1.21343000  |   |              |             |             |

|    |             |             |             |   |              |             |             |
|----|-------------|-------------|-------------|---|--------------|-------------|-------------|
| N1 |             |             |             | H | -8.58006500  | 1.05165200  | 1.17684900  |
| C  | 2.67387900  | -0.78285700 | -0.72457100 | C | -9.79535400  | -1.03187400 | -1.23136000 |
| C  | 1.26783700  | -1.41087800 | -0.86917300 | H | -8.57359800  | -2.28700700 | -2.47982300 |
| C  | 0.17285700  | -0.48295500 | -0.32688700 | H | -10.73070200 | 0.31151100  | 0.17169100  |
| C  | 1.49137000  | 1.45098500  | -0.64902300 | H | -10.73008600 | -1.35809500 | -1.67404600 |
| C  | 2.70136900  | 0.68719900  | -1.20050600 | H | 2.70172700   | 0.70771800  | -2.29792500 |
| H  | 1.06881900  | -1.51689000 | -1.93998800 | N | -4.47540500  | 2.43890000  | 0.39267600  |
| H  | 2.95959600  | -0.79190300 | 0.32391600  | H | -5.24767100  | 2.57898500  | -0.24102500 |
| H  | 1.57941800  | 1.49300000  | 0.44631400  | C | -4.93225200  | 4.74010500  | 1.09475100  |
| H  | 0.26088700  | -0.33047200 | 0.75722100  | H | -5.51156900  | 4.94208700  | 1.99844900  |
| O  | 0.29847700  | 0.75049300  | -1.00173100 | H | -4.20481100  | 5.54649200  | 0.98730800  |
| O  | 3.57863900  | -1.56795000 | -1.48889400 | H | -5.60334800  | 4.74904800  | 0.23393500  |
| C  | 1.29607600  | 2.86759500  | -1.16583100 | N | 1.18042100   | -2.76280600 | -0.31056900 |
| H  | 1.08827200  | 2.82469000  | -2.24534200 | H | 0.55904600   | -3.38016700 | -0.80668700 |
| H  | 2.20384700  | 3.45380300  | -1.01583800 | C | 1.47670900   | -4.74243900 | 1.07111000  |
| H  | 4.20482600  | -2.00709100 | -0.88634100 | H | 0.77445500   | -5.19701500 | 0.36972800  |
| O  | 0.24655100  | 3.51914000  | -0.47238700 | H | 2.40784700   | -5.31286600 | 1.05686700  |
| H  | -0.43031100 | 2.86421800  | -0.22534200 | H | 1.06329600   | -4.81414700 | 2.07892100  |
| C  | -2.59035900 | 0.82729400  | 0.07075500  | C | 1.79688000   | -3.28772700 | 0.78044800  |
| C  | -4.01923900 | 1.06468600  | 0.60692100  | O | 2.57450900   | -2.66350100 | 1.50282200  |
| C  | -2.20375500 | -0.66543500 | 0.16313400  | C | -4.19000900  | 3.43659500  | 1.27664400  |
| H  | -2.55301700 | 1.12118400  | -0.98605800 | O | -3.35936500  | 3.28631900  | 2.16994700  |
| C  | -5.00033100 | 0.08279100  | -0.03782900 | C | 5.11564500   | 0.86609900  | -0.83876200 |
| H  | -4.03239300 | 0.86791700  | 1.68406500  | C | 6.15094700   | 1.98605700  | -0.66964700 |
| C  | -3.32514500 | -1.57683100 | -0.36356700 | H | 5.24261000   | 0.37663900  | -1.81526200 |
| H  | -1.99291200 | -0.91013300 | 1.20997900  | C | 6.50412400   | -0.78767200 | 0.13391500  |
| H  | -5.05308500 | 0.23401100  | -1.12978000 | C | 7.55407200   | 1.37950900  | -0.53706200 |
| H  | -3.38767800 | -1.45364100 | -1.45552900 | H | 6.11706300   | 2.63956800  | -1.55212900 |
| O  | -4.58431500 | -1.23773800 | 0.23051400  | C | 7.60704800   | 0.21585700  | 0.46905000  |
| O  | -6.25533800 | 0.29005300  | 0.53445300  | H | 6.66696100   | -1.17501600 | -0.88446200 |
| O  | -1.07784300 | -1.02136400 | -0.64745100 | H | 7.86491500   | 0.98654300  | -1.51083200 |
| C  | -3.10794100 | -3.05435700 | -0.05394800 | H | 7.42991700   | 0.60821400  | 1.47934400  |
| H  | -3.91810000 | -3.63152600 | -0.51738800 | O | 5.26097900   | -0.09302900 | 0.18980700  |
| H  | -2.16343800 | -3.37867500 | -0.48829500 | O | 8.86865800   | -0.43486500 | 0.40285200  |
| O  | -3.02658900 | -3.31985300 | 1.33589400  | O | 8.51954700   | 2.37039600  | -0.19961900 |
| H  | -3.86693700 | -3.07545000 | 1.74431300  | O | 5.92394100   | 2.75157500  | 0.50763200  |
| O  | -1.64795500 | 1.62328900  | 0.78170400  | C | 6.36805100   | -1.97895600 | 1.06955600  |
| H  | -2.09905900 | 2.15712400  | 1.46553600  | H | 7.29299500   | -2.55798600 | 1.06251500  |
| O  | 3.84390600  | 1.42869900  | -0.72298100 | H | 6.18025100   | -1.63310900 | 2.09101800  |
| C  | -7.38902000 | -0.19578500 | -0.09445200 | O | 5.30151800   | -2.81726000 | 0.61403700  |
| C  | -7.37543200 | -1.14324400 | -1.11746000 | H | 4.52881800   | -2.74325600 | 1.19691800  |
| C  | -8.59732500 | 0.32510200  | 0.37200600  | H | 9.55132400   | 0.24852000  | 0.44810200  |
| C  | -8.58557100 | -1.54877800 | -1.68449800 | H | 8.12114100   | 2.94989000  | 0.46613600  |
| H  | -6.44716800 | -1.58864200 | -1.44980000 | H | 4.97646100   | 2.91760300  | 0.59668900  |
| C  | -9.79449900 | -0.09595900 | -0.19562700 |   |              |             |             |

|    |             |             |             |   |             |             |             |
|----|-------------|-------------|-------------|---|-------------|-------------|-------------|
| N2 |             |             |             | H | 8.20348500  | 0.55710300  | -2.36545600 |
| C  | -2.72194600 | -0.62029100 | 0.76614800  | C | 9.91370300  | -1.10217500 | 0.07157400  |
| C  | -1.30524600 | -1.15179000 | 1.07015500  | H | 8.99455900  | -2.02432500 | 1.78407900  |
| C  | -0.21092000 | -0.26903400 | 0.45976900  | H | 10.51869300 | -0.10050300 | -1.73904700 |
| C  | -1.61138500 | 1.63317800  | 0.40658000  | H | 10.92144300 | -1.38833400 | 0.35283800  |
| C  | -2.82241700 | 0.90350500  | 1.00532700  | H | -2.88310300 | 1.08742800  | 2.08583500  |
| H  | -1.16831300 | -1.10636600 | 2.15554500  | N | 4.44525100  | 2.40960100  | -0.86659500 |
| H  | -2.96059800 | -0.80637000 | -0.27783200 | H | 4.44073200  | 2.85210400  | -1.77016100 |
| H  | -1.64695200 | 1.52193500  | -0.68730500 | C | 5.20010800  | 4.59045600  | -0.07286500 |
| H  | -0.23797100 | -0.29775400 | -0.63848500 | H | 4.61548800  | 5.27481500  | 0.54433200  |
| O  | -0.40855600 | 1.06359400  | 0.90560100  | H | 6.24649600  | 4.70175100  | 0.22071400  |
| O  | -3.63568500 | -1.30091900 | 1.61219400  | H | 5.09853200  | 4.88021000  | -1.12087800 |
| C  | -1.54144000 | 3.11278400  | 0.72886300  | N | -1.09911100 | -2.55082300 | 0.68538800  |
| H  | -1.38249300 | 3.24521000  | 1.80548300  | H | -0.31271600 | -2.98100000 | 1.14719500  |
| H  | -2.47367500 | 3.60465100  | 0.43870600  | C | -1.08204500 | -4.68195800 | -0.45712800 |
| H  | -4.22275100 | -1.85950900 | 1.07068300  | H | -1.49234400 | -5.33160300 | 0.32202000  |
| O  | -0.43546200 | 3.63656400  | -0.01603500 | H | -1.37409100 | -5.08426900 | -1.42539100 |
| H  | -0.23628500 | 4.53206400  | 0.27738300  | H | 0.00789400  | -4.69079600 | -0.37599200 |
| C  | 2.57377600  | 0.95168300  | -0.11695100 | C | -1.65612600 | -3.28253100 | -0.31700700 |
| C  | 3.95515700  | 1.03755600  | -0.80515000 | O | -2.56570600 | -2.88510900 | -1.04594800 |
| C  | 2.16332000  | -0.51860800 | 0.07467100  | C | 4.75996600  | 3.16764100  | 0.22165300  |
| H  | 2.62432100  | 1.42962500  | 0.86476900  | O | 4.71370600  | 2.73456200  | 1.36668600  |
| C  | 4.99927000  | 0.08376800  | -0.20421800 | C | -5.22498600 | 0.94029600  | 0.52867300  |
| H  | 3.81461300  | 0.71626200  | -1.84047200 | C | -6.28132000 | 1.98104500  | 0.13427300  |
| C  | 3.30437300  | -1.30777300 | 0.72974100  | H | -5.37681700 | 0.61889300  | 1.56913000  |
| H  | 1.94109100  | -0.96009200 | -0.90317700 | C | -6.52589200 | -0.89829600 | -0.19352600 |
| H  | 5.32363200  | 0.42059700  | 0.78563000  | C | -7.66111700 | 1.31419900  | 0.04684500  |
| H  | 3.52708800  | -0.87071000 | 1.71522300  | H | -6.30613100 | 2.77312600  | 0.89509100  |
| O  | 4.45853900  | -1.22988700 | -0.11025800 | C | -7.63779000 | -0.00681700 | -0.74382000 |
| O  | 6.07775600  | 0.04359900  | -1.09230800 | H | -6.72081000 | -1.10278900 | 0.87100200  |
| O  | 1.02737500  | -0.69564800 | 0.93260300  | H | -8.00957000 | 1.08412300  | 1.05914100  |
| C  | 3.01074300  | -2.78904600 | 0.92840800  | H | -7.42435900 | 0.21055700  | -1.79903300 |
| H  | 3.89527300  | -3.26072100 | 1.37367800  | O | -5.30017600 | -0.17971100 | -0.32673100 |
| H  | 2.17973600  | -2.90348900 | 1.62365700  | O | -8.88342400 | -0.67756800 | -0.61638500 |
| O  | 2.63264800  | -3.45441000 | -0.26918500 | O | -8.63272100 | 2.20156100  | -0.49682900 |
| H  | 3.36907500  | -3.40272200 | -0.89198300 | O | -6.01914200 | 2.55036600  | -1.14406200 |
| O  | 1.67610600  | 1.64882600  | -0.97050200 | C | -6.31850500 | -2.23345600 | -0.89002700 |
| H  | 1.04356100  | 2.16948800  | -0.45152200 | H | -7.23726300 | -2.82021700 | -0.83500900 |
| O  | -3.96178600 | 1.51868200  | 0.36680500  | H | -6.06995900 | -2.07142600 | -1.94377700 |
| C  | 7.31761700  | -0.36425200 | -0.64674900 | O | -5.27448900 | -2.94837700 | -0.22437700 |
| C  | 7.53021600  | -1.09849500 | 0.52026900  | H | -4.47839900 | -3.00318200 | -0.77760500 |
| C  | 8.39547700  | -0.00985100 | -1.46118200 | H | -9.58144500 | -0.03750600 | -0.81160400 |
| C  | 8.83266100  | -1.45503000 | 0.87423800  | H | -8.22249700 | 2.66227300  | -1.24319300 |
| H  | 6.69659400  | -1.41276400 | 1.13435500  | H | -5.06703200 | 2.68004300  | -1.24122700 |
| C  | 9.68615000  | -0.38108100 | -1.10173400 |   |             |             |             |

|    |             |             |             |   |              |             |             |
|----|-------------|-------------|-------------|---|--------------|-------------|-------------|
| N3 |             |             |             | H | -8.32268900  | -1.08284300 | -2.05410500 |
| C  | 2.73118000  | 0.31417400  | 0.82945900  | C | -9.58854800  | 1.92866600  | -1.08085800 |
| C  | 1.30371300  | 0.70237600  | 1.27803600  | H | -8.45449100  | 3.45069400  | -0.06833200 |
| C  | 0.24150400  | 0.12019300  | 0.34184300  | H | -10.43489300 | 0.22952700  | -2.10258500 |
| C  | 1.65943500  | -1.69408500 | -0.31422600 | H | -10.50796500 | 2.50396400  | -1.09455900 |
| C  | 2.84364600  | -1.19767900 | 0.52764800  | H | 2.88921100   | -1.74099300 | 1.48085300  |
| H  | 1.13275800  | 0.23526700  | 2.25301800  | N | -4.99539300  | -2.47662900 | 0.53714000  |
| H  | 2.98187200  | 0.85301600  | -0.08064500 | H | -5.04550800  | -3.34718100 | 0.03470700  |
| H  | 1.72237700  | -1.24287900 | -1.31344100 | C | -6.13217600  | -3.71778900 | 2.30510700  |
| H  | 0.32079500  | 0.52289100  | -0.67830200 | H | -5.53156400  | -4.13699700 | 3.11584000  |
| O  | 0.43253800  | -1.29215000 | 0.30424400  | H | -7.11053100  | -3.46841800 | 2.71889400  |
| O  | 3.61890300  | 0.66931500  | 1.87754500  | H | -6.25626100  | -4.47863700 | 1.53175900  |
| C  | 1.57996700  | -3.20813900 | -0.46668500 | N | 1.12860800   | 2.14074200  | 1.48829900  |
| H  | 1.45340600  | -3.66541600 | 0.52508700  | H | 0.48744100   | 2.37667600  | 2.22846400  |
| H  | 2.50920200  | -3.58146700 | -0.89514200 | C | 1.36957900   | 4.55855300  | 1.39201500  |
| H  | 4.22237200  | 1.36781800  | 1.56457700  | H | 2.26182100   | 5.00175100  | 1.84090100  |
| O  | 0.54416300  | -3.60171700 | -1.35024000 | H | 1.07584100   | 5.19406600  | 0.55511000  |
| H  | -0.31108200 | -3.32610600 | -0.99236200 | H | 0.57133200   | 4.55530000  | 2.13705100  |
| C  | -2.88539900 | -1.16920900 | 0.62506800  | C | 1.73185700   | 3.18449000  | 0.85880200  |
| C  | -4.22783500 | -1.40432800 | -0.08560300 | O | 2.52977800   | 3.06402100  | -0.06941600 |
| C  | -2.14853400 | 0.03814400  | 0.03567400  | C | -5.46850700  | -2.44390500 | 1.81699600  |
| H  | -3.07353400 | -0.96452300 | 1.68484700  | O | -5.37082500  | -1.45434400 | 2.53170100  |
| C  | -5.03954700 | -0.10327500 | -0.20839300 | C | 5.25219100   | -1.06100600 | 0.11872400  |
| H  | -4.01401200 | -1.72999100 | -1.10693500 | C | 6.32685700   | -1.89832200 | -0.58744100 |
| C  | -3.07392200 | 1.25879900  | -0.03043500 | H | 5.38027700   | -1.12117300 | 1.20936200  |
| H  | -1.79740000 | -0.19510600 | -0.97332400 | C | 6.55105200   | 0.91708300  | 0.10744600  |
| H  | -5.40182400 | 0.22977600  | 0.76901100  | C | 7.70155200   | -1.24334600 | -0.39706300 |
| H  | -3.36474900 | 1.55146700  | 0.99018700  | H | 6.33877500   | -2.90633900 | -0.15082000 |
| O  | -4.23268300 | 0.91571500  | -0.79479400 | C | 7.68488800   | 0.26913700  | -0.68556600 |
| O  | -6.10327200 | -0.35985800 | -1.07374000 | H | 6.72086100   | 0.74675200  | 1.18235000  |
| O  | -1.02124700 | 0.36379500  | 0.87680000  | H | 8.01767700   | -1.37627800 | 0.64291400  |
| C  | -2.44686200 | 2.46013200  | -0.72860700 | H | 7.50051200   | 0.42685200  | -1.75654700 |
| H  | -3.16181200 | 3.29200800  | -0.70777100 | O | 5.33439100   | 0.28802000  | -0.29088800 |
| H  | -1.54735600 | 2.76748800  | -0.19459200 | O | 8.91874300   | 0.85814900  | -0.30059200 |
| O  | -2.04597900 | 2.16773500  | -2.05781400 | O | 8.69782600   | -1.88701900 | -1.18337300 |
| H  | -2.83162700 | 1.91911600  | -2.56209100 | O | 6.10721900   | -1.98089100 | -1.99052600 |
| O  | -2.13506600 | -2.37258400 | 0.49371500  | C | 6.34707700   | 2.40929300  | -0.10001800 |
| H  | -1.23877000 | -2.19271400 | 0.81740700  | H | 7.25115800   | 2.94662100  | 0.19107400  |
| O  | 3.99831700  | -1.54784400 | -0.26144100 | H | 6.14105300   | 2.61665500  | -1.15476300 |
| C  | -7.22156700 | 0.44872800  | -1.03963200 | O | 5.26380600   | 2.85068100  | 0.72533800  |
| C  | -7.24674500 | 1.72802600  | -0.48437700 | H | 4.48902300   | 3.08377200  | 0.18978600  |
| C  | -8.36952900 | -0.08756600 | -1.62621800 | H | 9.62948700   | 0.32673600  | -0.68465500 |
| C  | -8.43746600 | 2.45636600  | -0.50315100 | H | 8.31094200   | -2.07233300 | -2.05150500 |
| H  | -6.35046600 | 2.16566600  | -0.06464000 | H | 5.17007900   | -2.14521000 | -2.15572700 |
| C  | -9.54572100 | 0.65344400  | -1.64697500 |   |              |             |             |



|    |             |             |             |   |              |             |             |
|----|-------------|-------------|-------------|---|--------------|-------------|-------------|
| N4 |             |             |             | H | -8.42736000  | -1.15863800 | -1.55747100 |
| C  | 2.61604900  | 0.80781600  | 0.67552500  | C | -9.77926700  | 0.24666600  | 1.23706800  |
| C  | 1.25634200  | 1.53381400  | 0.81345200  | H | -8.65801800  | 1.34998500  | 2.70417400  |
| C  | 0.13079200  | 0.75765500  | 0.12138200  | H | -10.60987500 | -0.88119000 | -0.40169500 |
| C  | 1.26625700  | -1.30369200 | 0.29913700  | H | -10.72845400 | 0.36894500  | 1.74735400  |
| C  | 2.50490600  | -0.70644300 | 0.97867500  | H | 2.45032800   | -0.84569800 | 2.06612600  |
| H  | 1.00433100  | 1.55029100  | 1.87840900  | N | -4.17457400  | -2.22436100 | -1.14683000 |
| H  | 2.97204200  | 0.91004400  | -0.34634700 | H | -4.84037300  | -2.46170100 | -1.86434500 |
| H  | 1.40851200  | -1.23726200 | -0.79000900 | C | -4.21389200  | -4.62872500 | -0.79283800 |
| H  | 0.27838000  | 0.69615500  | -0.96440000 | H | -3.36207000  | -5.22127800 | -1.13493800 |
| O  | 0.12595800  | -0.54793000 | 0.67735500  | H | -4.62363700  | -5.12503000 | 0.08841000  |
| O  | 3.52701000  | 1.41719900  | 1.57891900  | H | -4.97026600  | -4.61818500 | -1.57996100 |
| C  | 0.94548700  | -2.75259100 | 0.64003000  | N | 1.29467000   | 2.93577800  | 0.38695900  |
| H  | 0.72241500  | -2.84365600 | 1.70801400  | H | 0.61253600   | 3.52029400  | 0.84248700  |
| H  | 1.80105000  | -3.38915300 | 0.40857300  | C | 1.79465800   | 5.02145700  | -0.75658100 |
| H  | 4.22663400  | 1.86848300  | 1.07344500  | H | 2.71516300   | 5.55865500  | -0.51669900 |
| O  | -0.16479500 | -3.18534800 | -0.15042100 | H | 1.56952100   | 5.21235400  | -1.80729600 |
| H  | -0.96461200 | -3.29582700 | 0.38814200  | H | 0.98502700   | 5.42086800  | -0.14304300 |
| C  | -2.44881500 | -0.48812800 | -0.56841900 | C | 2.04238700   | 3.53494100  | -0.57538800 |
| C  | -3.88169100 | -0.79343900 | -1.04551200 | O | 2.88416000   | 2.95635200  | -1.26355700 |
| C  | -2.23746000 | 1.02661600  | -0.38744300 | C | -3.71375000  | -3.25376700 | -0.38966300 |
| H  | -2.27710400 | -0.96703000 | 0.39250400  | O | -2.93269000  | -3.12546600 | 0.55373600  |
| C  | -4.93053100 | -0.06696500 | -0.19742800 | C | 4.91428000   | -1.05402600 | 0.73146400  |
| H  | -3.97927700 | -0.39346500 | -2.05963300 | C | 5.86537400   | -2.23278600 | 0.48566800  |
| C  | -3.40520900 | 1.67658900  | 0.37354600  | H | 5.00805400   | -0.70064800 | 1.76869100  |
| H  | -2.12496300 | 1.49541500  | -1.37114100 | C | 6.49797000   | 0.57527000  | 0.06888300  |
| H  | -4.93602900 | -0.43700700 | 0.83861800  | C | 7.31916000   | -1.74233100 | 0.51451700  |
| H  | -3.37060300 | 1.32658500  | 1.41615000  | H | 5.71743800   | -2.98232400 | 1.27519900  |
| O  | -4.66225200 | 1.32321000  | -0.21317300 | C | 7.53705000   | -0.47229200 | -0.32769000 |
| O  | -6.17642200 | -0.28066400 | -0.79621700 | H | 6.61671000   | 0.81350800  | 1.13767100  |
| O  | -1.09182900 | 1.35410400  | 0.42420600  | H | 7.59254300   | -1.50227900 | 1.54735200  |
| C  | -3.36548100 | 3.20136400  | 0.37109500  | H | 7.40050400   | -0.71892300 | -1.38912100 |
| H  | -4.18456800 | 3.57306500  | 1.00008000  | O | 5.20987900   | 0.00594800  | -0.15466500 |
| H  | -2.42282200 | 3.54270300  | 0.79731000  | O | 8.83893800   | 0.05000400  | -0.10192500 |
| O  | -3.44319500 | 3.74867600  | -0.93494100 | O | 8.22135200   | -2.76697900 | 0.11010200  |
| H  | -4.27472700 | 3.46049900  | -1.33309900 | O | 5.66001900   | -2.82928800 | -0.78998400 |
| O  | -1.55057600 | -0.99587700 | -1.54345500 | C | 6.52762200   | 1.88345400  | -0.70585000 |
| H  | -1.04726400 | -1.73743000 | -1.16195500 | H | 7.49863900   | 2.36421800  | -0.57494200 |
| O  | 3.61051900  | -1.48094100 | 0.46758800  | H | 6.37460500   | 1.69011900  | -1.77247000 |
| C  | -7.33357800 | -0.06703800 | -0.07258700 | O | 5.51331100   | 2.75393500  | -0.19726900 |
| C  | -7.39018400 | 0.64861300  | 1.12333400  | H | 4.78067400   | 2.84210900  | -0.82841500 |
| C  | -8.49502300 | -0.61364000 | -0.62227800 | H | 9.46661400   | -0.67945800 | -0.19660000 |
| C  | -8.61715800 | 0.79269700  | 1.77376700  | H | 7.82807000   | -3.21778900 | -0.65131200 |
| H  | -6.50347600 | 1.11434500  | 1.53252900  | H | 4.71123300   | -2.88684400 | -0.96119500 |
| C  | -9.71151500 | -0.45329400 | 0.03139300  |   |              |             |             |

|    |             |             |             |   |              |             |             |
|----|-------------|-------------|-------------|---|--------------|-------------|-------------|
| N5 |             |             |             | H | -8.60171000  | 1.05119600  | 1.13344200  |
| C  | 2.66704800  | -0.77206200 | -0.66475800 | C | -9.80183700  | -0.97779800 | -1.32848000 |
| C  | 1.26586800  | -1.40841800 | -0.80132900 | H | -8.57342900  | -2.21792800 | -2.58544700 |
| C  | 0.15978700  | -0.48262900 | -0.27833600 | H | -10.74501900 | 0.34591600  | 0.08798000  |
| C  | 1.47008200  | 1.45409200  | -0.58931200 | H | -10.73328200 | -1.28858400 | -1.78889400 |
| C  | 2.68815500  | 0.69958600  | -1.13658100 | H | 2.69028000   | 0.72010500  | -2.23496500 |
| H  | 1.07246400  | -1.53296700 | -1.87142600 | N | -4.47518600  | 2.42748900  | 0.42502900  |
| H  | 2.96514100  | -0.78115000 | 0.38009700  | H | -5.20806100  | 2.59787100  | -0.24660200 |
| H  | 1.55064400  | 1.49002300  | 0.50621500  | C | -4.91331700  | 4.72366400  | 1.15454500  |
| H  | 0.23173600  | -0.32675400 | 0.80654900  | H | -5.50753100  | 4.92825800  | 2.04781900  |
| O  | 0.28124000  | 0.74697900  | -0.95494900 | H | -4.16633300  | 5.51507100  | 1.07172900  |
| O  | 3.56844000  | -1.55175300 | -1.44297600 | H | -5.56504100  | 4.75658500  | 0.27949500  |
| C  | 1.27959700  | 2.87321900  | -1.09805600 | N | 1.17419100   | -2.75169400 | -0.21786200 |
| H  | 1.10580000  | 2.84143100  | -2.18419200 | H | 0.48741200   | -3.34313700 | -0.65655200 |
| H  | 2.17970600  | 3.45844600  | -0.90754500 | C | 1.45047900   | -4.72460300 | 1.17452000  |
| H  | 4.19805600  | -1.99681100 | -0.85110700 | H | 0.68599200   | -5.15181700 | 0.52292200  |
| O  | 0.19940300  | 3.51060100  | -0.43514900 | H | 2.34986000   | -5.34121600 | 1.11447000  |
| H  | -0.45895300 | 2.84236500  | -0.17742300 | H | 1.09458700   | -4.76367500 | 2.20580500  |
| C  | -2.60015500 | 0.80809600  | 0.10387300  | C | 1.82468800   | -3.29060700 | 0.84484100  |
| C  | -4.03631000 | 1.04571100  | 0.61941800  | O | 2.67168800   | -2.70055200 | 1.51740300  |
| C  | -2.22460400 | -0.68799100 | 0.17722600  | C | -4.20285600  | 3.40263600  | 1.33748600  |
| H  | -2.54143000 | 1.11979900  | -0.94684700 | O | -3.40729300  | 3.21897000  | 2.25595600  |
| C  | -5.01477300 | 0.08300100  | -0.05686300 | C | 5.08423700   | 0.92264000  | -0.78640600 |
| H  | -4.06882900 | 0.83092300  | 1.69253600  | C | 6.13760400   | 2.02687500  | -0.64344100 |
| C  | -3.34155300 | -1.57822300 | -0.39297600 | H | 5.20413000   | 0.43899800  | -1.76828300 |
| H  | -2.04090800 | -0.95337000 | 1.22430600  | C | 6.49981500   | -0.76867900 | 0.09146900  |
| H  | -5.05476300 | 0.25675200  | -1.14605000 | C | 7.52878200   | 1.37261000  | -0.65693500 |
| H  | -3.38396500 | -1.42590700 | -1.48222800 | H | 6.05838400   | 2.69865400  | -1.51012400 |
| O  | -4.60879800 | -1.24580700 | 0.18810500  | C | 7.63932000   | 0.22642100  | 0.35262600  |
| O  | -6.27515200 | 0.28393000  | 0.50591000  | H | 6.60135800   | -1.16238700 | -0.93289400 |
| O  | -1.08277900 | -1.03849500 | -0.61228300 | H | 7.72045600   | 0.95526400  | -1.65653900 |
| C  | -3.14081600 | -3.06518100 | -0.12030600 | H | 7.54317100   | 0.63157200  | 1.36592500  |
| H  | -3.94948300 | -3.62256100 | -0.60991800 | O | 5.27511400   | -0.06322000 | 0.22408700  |
| H  | -2.19379500 | -3.38621800 | -0.55175300 | O | 8.94776800   | -0.33058300 | 0.15764200  |
| O  | -3.08029600 | -3.36976400 | 1.26270700  | O | 8.47381800   | 2.40086300  | -0.38145100 |
| H  | -3.92212400 | -3.12394400 | 1.66722700  | O | 5.92768100   | 2.74195600  | 0.55695900  |
| O  | -1.66638600 | 1.58652700  | 0.84384300  | C | 6.40458200   | -1.95735400 | 1.03783900  |
| H  | -2.12271300 | 2.10218400  | 1.53722100  | H | 7.33532200   | -2.53252900 | 1.01233300  |
| O  | 3.81171100  | 1.44928100  | -0.64635700 | H | 6.23739400   | -1.60519100 | 2.06160000  |
| C  | -7.40382100 | -0.18101800 | -0.14606700 | O | 5.35122300   | -2.82086700 | 0.61828500  |
| C  | -7.38439000 | -1.10914100 | -1.18664200 | H | 4.57399000   | -2.74124300 | 1.19677200  |
| C  | -8.61430900 | 0.33981400  | 0.31508700  | H | 9.22889200   | -0.79926800 | 0.95079100  |
| C  | -8.59014400 | -1.49490600 | -1.77632800 | H | 9.33792400   | 1.98323100  | -0.26944800 |
| H  | -6.45500500 | -1.55474400 | -1.51554500 | H | 6.70391800   | 3.30281900  | 0.69120900  |
| C  | -9.80721200 | -0.06161600 | -0.27523300 |   |              |             |             |

|    |             |             |             |   |             |             |             |
|----|-------------|-------------|-------------|---|-------------|-------------|-------------|
| N6 |             |             |             | H | 8.30470200  | 0.54986100  | -2.25628600 |
| C  | -2.70032900 | -0.64119100 | 0.63563500  | C | 9.96330000  | -1.07026400 | 0.24208800  |
| C  | -1.28111800 | -1.18459200 | 0.89981100  | H | 9.00707000  | -1.97811000 | 1.94188800  |
| C  | -0.17706700 | -0.28456300 | 0.33085700  | H | 10.60766600 | -0.08551100 | -1.56425200 |
| C  | -1.58100600 | 1.59885600  | 0.24809400  | H | 10.96542000 | -1.34635500 | 0.55212800  |
| C  | -2.78856000 | 0.88473300  | 0.86746500  | H | -2.82643600 | 1.07369600  | 1.94897500  |
| H  | -1.14120800 | -1.19168000 | 1.98617600  | N | 4.50217500  | 2.40098800  | -0.86102200 |
| H  | -2.98268100 | -0.83075200 | -0.39689100 | H | 4.50186200  | 2.84543400  | -1.76368300 |
| H  | -1.61035100 | 1.45012100  | -0.84103300 | C | 5.20281700  | 4.59469800  | -0.05175900 |
| H  | -0.16919800 | -0.30819900 | -0.76800100 | H | 4.56998800  | 5.26984800  | 0.52720200  |
| O  | -0.38198600 | 1.04178600  | 0.77568800  | H | 6.22903500  | 4.73372800  | 0.29565400  |
| O  | -3.58693500 | -1.30874600 | 1.52412500  | H | 5.14919600  | 4.87340700  | -1.10627400 |
| C  | -1.52010300 | 3.08872700  | 0.51215800  | N | -1.05729100 | -2.55948800 | 0.43135900  |
| H  | -1.39978700 | 3.27073100  | 1.58702300  | H | -0.16821100 | -2.93251800 | 0.72915700  |
| H  | -2.44057600 | 3.56043700  | 0.16078800  | C | -1.11858100 | -4.68799300 | -0.72214700 |
| H  | -4.20483300 | -1.86149300 | 1.01646900  | H | -1.65681200 | -5.43944000 | -0.13710000 |
| O  | -0.38267100 | 3.57864600  | -0.21206400 | H | -1.25402300 | -4.93343200 | -1.77558600 |
| H  | -0.24845300 | 4.51235000  | -0.01820500 | H | -0.05706500 | -4.74284900 | -0.47333900 |
| C  | 2.61311700  | 0.93866900  | -0.16787100 | C | -1.73897300 | -3.32694000 | -0.45835000 |
| C  | 4.01873100  | 1.02600300  | -0.80757300 | O | -2.79090100 | -3.00048700 | -1.01075900 |
| C  | 2.21198300  | -0.53369300 | 0.02716600  | C | 4.78113800  | 3.16438800  | 0.23344500  |
| H  | 2.62288200  | 1.43026300  | 0.80835100  | O | 4.71738400  | 2.73107000  | 1.37746800  |
| C  | 5.05066800  | 0.08216000  | -0.16993800 | C | -5.18540700 | 0.98467700  | 0.47470200  |
| H  | 3.91327700  | 0.69853400  | -1.84510500 | C | -6.25432300 | 2.03227400  | 0.14302600  |
| C  | 3.33730600  | -1.29585900 | 0.73853100  | H | -5.29175600 | 0.68476300  | 1.52890000  |
| H  | 2.03749200  | -0.98951800 | -0.95406800 | C | -6.57783300 | -0.85351200 | -0.07797400 |
| H  | 5.34977000  | 0.43190900  | 0.82320500  | C | -7.63699200 | 1.37208800  | 0.26063800  |
| H  | 3.53139000  | -0.82638000 | 1.71511100  | H | -6.18998400 | 2.84107000  | 0.88529200  |
| O  | 4.51329900  | -1.23298300 | -0.07216200 | C | -7.72560600 | 0.06222300  | -0.52669800 |
| O  | 6.15100700  | 0.03624800  | -1.03129800 | H | -6.67869100 | -1.04529000 | 1.00217100  |
| O  | 1.04622100  | -0.72234300 | 0.83885900  | H | -7.83520300 | 1.13880900  | 1.31703300  |
| C  | 3.04126600  | -2.76967200 | 0.98178600  | H | -7.62265600 | 0.27781800  | -1.59607000 |
| H  | 3.92905700  | -3.23214600 | 1.42973900  | O | -5.35982300 | -0.16832200 | -0.33939900 |
| H  | 2.21818700  | -2.86075700 | 1.68979900  | O | -9.03061900 | -0.46211800 | -0.24420600 |
| O  | 2.64410700  | -3.47039500 | -0.19088300 | O | -8.58936200 | 2.32327800  | -0.20330100 |
| H  | 3.37503600  | -3.45069200 | -0.82171000 | O | -6.04604300 | 2.54274400  | -1.15853300 |
| O  | 1.74358600  | 1.61511700  | -1.06457800 | C | -6.46393800 | -2.20290600 | -0.77303000 |
| H  | 1.09569600  | 2.15217900  | -0.58088200 | H | -7.40468000 | -2.75427600 | -0.67356600 |
| O  | -3.92088500 | 1.50217500  | 0.23673900  | H | -6.25525700 | -2.05589700 | -1.83846000 |
| C  | 7.38153100  | -0.35770400 | -0.55003300 | O | -5.44046200 | -2.97071900 | -0.15010100 |
| C  | 7.56929100  | -1.07671200 | 0.63075000  | H | -4.65299900 | -3.05042800 | -0.71436700 |
| C  | 8.47750500  | -0.00570000 | -1.34114100 | H | -9.29178600 | -1.08735300 | -0.92885500 |
| C  | 8.86453900  | -1.42069300 | 1.02149300  | H | -9.44711200 | 1.88079700  | -0.25107900 |
| H  | 6.72208000  | -1.38868600 | 1.22714500  | H | -6.84761900 | 3.02692500  | -1.40122700 |
| C  | 9.76098200  | -0.36433800 | -0.94501500 |   |             |             |             |

|    |             |             |             |   |              |             |             |
|----|-------------|-------------|-------------|---|--------------|-------------|-------------|
| N7 |             |             |             | H | -8.34466900  | -1.09192200 | -2.02880900 |
| C  | 2.72512100  | 0.32615900  | 0.78940000  | C | -9.61903800  | 1.90500400  | -1.02206600 |
| C  | 1.29871600  | 0.71443100  | 1.23676400  | H | -8.48672800  | 3.42238400  | -0.00065600 |
| C  | 0.23304300  | 0.12777000  | 0.30688200  | H | -10.46270900 | 0.21165100  | -2.05563600 |
| C  | 1.65423200  | -1.67261400 | -0.36370500 | H | -10.54094900 | 2.47648400  | -1.02629400 |
| C  | 2.83827100  | -1.18435300 | 0.48373300  | H | 2.87580100   | -1.72958700 | 1.43731900  |
| H  | 1.13080500  | 0.25200700  | 2.21464700  | N | -4.98774000  | -2.49038500 | 0.53459500  |
| H  | 2.98117600  | 0.86598000  | -0.11845500 | H | -5.01683500  | -3.36360500 | 0.03500300  |
| H  | 1.71409100  | -1.20548100 | -1.35500100 | C | -6.09081300  | -3.75573600 | 2.30629000  |
| H  | 0.30389200  | 0.53330000  | -0.71289100 | H | -5.47116400  | -4.17209600 | 3.10415200  |
| O  | 0.42535600  | -1.28148500 | 0.26549400  | H | -7.06602400  | -3.52384000 | 2.73717300  |
| O  | 3.61040000  | 0.67790500  | 1.84387800  | H | -6.21563700  | -4.51259100 | 1.52914800  |
| C  | 1.58767500  | -3.18335400 | -0.54371200 | N | 1.11572100   | 2.15439000  | 1.43873900  |
| H  | 1.49048900  | -3.66381400 | 0.44079000  | H | 0.43669300   | 2.38668500  | 2.14574500  |
| H  | 2.51163500  | -3.52844600 | -1.00482100 | C | 1.32651100   | 4.57383400  | 1.34232600  |
| H  | 4.20939900  | 1.38120600  | 1.53899100  | H | 2.19587000   | 5.03715500  | 1.81501300  |
| O  | 0.53346600  | -3.57265300 | -1.40923600 | H | 1.04725100   | 5.19726700  | 0.49139800  |
| H  | -0.31461300 | -3.30623500 | -1.02904500 | H | 0.50526200   | 4.56145300  | 2.06183500  |
| C  | -2.88637500 | -1.16861000 | 0.61433500  | C | 1.73041400   | 3.20261500  | 0.83092000  |
| C  | -4.23319700 | -1.40796000 | -0.08697400 | O | 2.56825700   | 3.09365300  | -0.06387700 |
| C  | -2.16058200 | 0.04427100  | 0.02194600  | C | -5.45345300  | -2.46868200 | 1.81729600  |
| H  | -3.06749900 | -0.96629000 | 1.67606300  | O | -5.36963500  | -1.47928900 | 2.53407400  |
| C  | -5.05408800 | -0.11171200 | -0.19442900 | C | 5.23270100   | -1.07266300 | 0.06614400  |
| H  | -4.02543700 | -1.72550000 | -1.11209400 | C | 6.33049300   | -1.90547700 | -0.60452300 |
| C  | -3.09374400 | 1.25997000  | -0.02831200 | H | 5.35834600   | -1.12483100 | 1.15871400  |
| H  | -1.81879300 | -0.18324600 | -0.99163000 | C | 6.53686500   | 0.90985100  | 0.11374400  |
| H  | -5.40916200 | 0.21357500  | 0.78811900  | C | 7.68935700   | -1.25834600 | -0.29113400 |
| H  | -3.37585500 | 1.54457600  | 0.99711300  | H | 6.31628100   | -2.91558300 | -0.17076600 |
| O  | -4.25877600 | 0.91539600  | -0.78256700 | C | 7.70786600   | 0.23811200  | -0.61709300 |
| O  | -6.12461600 | -0.36905500 | -1.05155600 | H | 6.66082600   | 0.75412400  | 1.19754200  |
| O  | -1.02704700 | 0.37339900  | 0.85218300  | H | 7.90125300   | -1.36768900 | 0.78270800  |
| C  | -2.48255400 | 2.47035400  | -0.72477200 | H | 7.58672000   | 0.37033500  | -1.69776200 |
| H  | -3.20183500 | 3.29808800  | -0.68666700 | O | 5.33998700   | 0.28864400  | -0.33396400 |
| H  | -1.57745800 | 2.77776700  | -0.20027000 | O | 8.99606400   | 0.70638600  | -0.19405700 |
| O  | -2.09815400 | 2.19262500  | -2.06165300 | O | 8.66676300   | -1.96654500 | -1.04441300 |
| H  | -2.88746200 | 1.93330500  | -2.55478900 | O | 6.10711000   | -1.96298600 | -1.99831900 |
| O  | -2.13323900 | -2.36817200 | 0.47493900  | C | 6.34797900   | 2.40187400  | -0.11872400 |
| H  | -1.22849700 | -2.18153600 | 0.77177100  | H | 7.25407400   | 2.94408600  | 0.16869300  |
| O  | 3.98129200  | -1.53704300 | -0.30912300 | H | 6.14550100   | 2.59197400  | -1.17817300 |
| C  | -7.24533500 | 0.43472400  | -1.00518900 | O | 5.27820600   | 2.87446000  | 0.69746400  |
| C  | -7.27362100 | 1.70884400  | -0.43808300 | H | 4.49179400   | 3.08740000  | 0.16826100  |
| C  | -8.39390100 | -0.10084500 | -1.59155100 | H | 9.22813900   | 1.51190900  | -0.66850500 |
| C  | -8.46751100 | 2.43218300  | -0.44476800 | H | 9.50804400   | -1.50124700 | -0.94742800 |
| H  | -6.37745900 | 2.14652900  | -0.01822500 | H | 6.90570400   | -2.33480400 | -2.39753900 |
| C  | -9.57330000 | 0.63521400  | -1.60011000 |   |              |             |             |

|    |             |             |             |   |              |             |             |
|----|-------------|-------------|-------------|---|--------------|-------------|-------------|
| N8 |             |             |             | H | -8.44910900  | -1.14088600 | -1.54058500 |
| C  | 2.61097700  | 0.80658700  | 0.62721100  | C | -9.78125800  | 0.21461600  | 1.28803300  |
| C  | 1.25410300  | 1.53496500  | 0.76757500  | H | -8.64859900  | 1.28832200  | 2.76831200  |
| C  | 0.11961300  | 0.75877400  | 0.09005100  | H | -10.62400300 | -0.88175100 | -0.36589800 |
| C  | 1.25478400  | -1.29659500 | 0.24022700  | H | -10.72693600 | 0.32860700  | 1.80674200  |
| C  | 2.49887600  | -0.71013400 | 0.91878000  | H | 2.44515400   | -0.85459400 | 2.00658900  |
| H  | 1.01099300  | 1.56081200  | 1.83463100  | N | -4.17861500  | -2.21335300 | -1.17560800 |
| H  | 2.97415700  | 0.91403300  | -0.39149100 | H | -4.80447900  | -2.45668800 | -1.92599800 |
| H  | 1.38828700  | -1.21048200 | -0.84806800 | C | -4.18447700  | -4.62135300 | -0.83904800 |
| H  | 0.25447400  | 0.70052200  | -0.99764900 | H | -3.30927700  | -5.18952900 | -1.16320600 |
| O  | 0.11680900  | -0.54520000 | 0.64178500  | H | -4.60736700  | -5.13715000 | 0.02454400  |
| O  | 3.51916600  | 1.40784100  | 1.54227700  | H | -4.91802700  | -4.61892800 | -1.64764100 |
| C  | 0.94561000  | -2.75330900 | 0.55423300  | N | 1.28034400   | 2.93381300  | 0.32365900  |
| H  | 0.77043600  | -2.87894400 | 1.62783500  | H | 0.54165800   | 3.49310700  | 0.71957100  |
| H  | 1.78912100  | -3.37813700 | 0.25958800  | C | 1.75099900   | 5.02344000  | -0.82159000 |
| H  | 4.21783500  | 1.86795600  | 1.04695600  | H | 2.63153100   | 5.60673500  | -0.54250200 |
| O  | -0.20374900 | -3.16402700 | -0.19604100 | H | 1.57477800   | 5.18775400  | -1.88611200 |
| H  | -0.98198800 | -3.25960800 | 0.37456800  | H | 0.89157500   | 5.39393700  | -0.25984000 |
| C  | -2.46127000 | -0.47693400 | -0.58719400 | C | 2.05617900   | 3.55231000  | -0.60186400 |
| C  | -3.89835300 | -0.78207100 | -1.05457600 | O | 2.96318500   | 3.00766200  | -1.23371700 |
| C  | -2.25489400 | 1.03615600  | -0.38969200 | C | -3.72825300  | -3.23980900 | -0.40733400 |
| H  | -2.28038700 | -0.96619400 | 0.36675900  | O | -2.98737300  | -3.10111400 | 0.56589400  |
| C  | -4.94258900 | -0.07380900 | -0.18613100 | C | 4.88642000   | -1.09420800 | 0.66615000  |
| H  | -4.00802100 | -0.36810500 | -2.06165300 | C | 5.85509200   | -2.26043900 | 0.44008700  |
| C  | -3.41560200 | 1.66509000  | 0.39909600  | H | 4.97897700   | -0.74920100 | 1.70782800  |
| H  | -2.16274000 | 1.51888000  | -1.36887700 | C | 6.48491900   | 0.56283500  | 0.09224300  |
| H  | -4.93920400 | -0.46128200 | 0.84328900  | C | 7.29065200   | -1.73610600 | 0.60496700  |
| H  | -3.36635000 | 1.29339400  | 1.43357400  | H | 5.67042900   | -3.02137400 | 1.21198400  |
| O  | -4.67803200 | 1.31791600  | -0.17985000 | C | 7.55370200   | -0.48739600 | -0.24139000 |
| O  | -6.19301300 | -0.27893900 | -0.77877500 | H | 6.55309600   | 0.81006200  | 1.16388900  |
| O  | -1.09814100 | 1.36261100  | 0.40642100  | H | 7.45535300   | -1.46425900 | 1.65798100  |
| C  | -3.38412100 | 3.18960700  | 0.42939300  | H | 7.48491300   | -0.75199100 | -1.30236000 |
| H  | -4.19915100 | 3.54281600  | 1.07415300  | O | 5.21798200   | -0.01131900 | -0.19590000 |
| H  | -2.43958000 | 3.52725600  | 0.85439200  | O | 8.88919600   | -0.07815500 | 0.08747400  |
| O  | -3.47797000 | 3.76555700  | -0.86354600 | O | 8.16442400   | -2.80089300 | 0.24600100  |
| H  | -4.30945200 | 3.47668800  | -1.26138100 | O | 5.66146700   | -2.80821700 | -0.84813800 |
| O  | -1.57144000 | -0.97187800 | -1.57543600 | C | 6.54446100   | 1.86860900  | -0.68756200 |
| H  | -1.06475500 | -1.71834200 | -1.20604600 | H | 7.52237500   | 2.34148500  | -0.55199000 |
| O  | 3.58615100  | -1.48650800 | 0.39074400  | H | 6.39507000   | 1.67144300  | -1.75476500 |
| C  | -7.34423000 | -0.07794300 | -0.04346300 | O | 5.55556000   | 2.76546800  | -0.19110900 |
| C  | -7.39227200 | 0.61508500  | 1.16623600  | H | 4.81211900   | 2.85732800  | -0.81111500 |
| C  | -8.51029300 | -0.61280200 | -0.59531200 | H | 9.25107900   | 0.46812200  | -0.61854500 |
| C  | -8.61475700 | 0.74872900  | 1.82722200  | H | 9.06399600   | -2.44862900 | 0.22775400  |
| H  | -6.50212700 | 1.07138900  | 1.57852700  | H | 6.40764600   | -3.39978800 | -1.01763200 |
| C  | -9.72224700 | -0.46297200 | 0.06912700  |   |              |             |             |

|    |             |             |             |   |              |             |             |
|----|-------------|-------------|-------------|---|--------------|-------------|-------------|
| 01 |             |             |             | H | -8.76568000  | 1.17936200  | 0.67232800  |
| C  | 2.53455400  | -1.15287600 | 0.14381900  | C | -9.85626200  | -1.07657800 | -1.63822000 |
| C  | 1.11288200  | -1.66175400 | -0.17855500 | H | -8.57142300  | -2.41013200 | -2.73245500 |
| C  | 0.05165100  | -0.57571000 | 0.06146200  | H | -10.86273500 | 0.35681500  | -0.38093200 |
| C  | 1.61713000  | 1.18657100  | -0.09179900 | H | -10.76729800 | -1.43913300 | -2.10162400 |
| C  | 2.80203100  | 0.26623100  | -0.39505500 | H | 2.97415300   | 0.22505100  | -1.47693400 |
| H  | 1.07978800  | -1.88819600 | -1.24755600 | N | -4.62193900  | 2.52013400  | -0.06115300 |
| H  | 2.64810300  | -1.10719000 | 1.23336800  | H | -5.37027500  | 2.58259300  | -0.73490800 |
| H  | 1.49887000  | 1.27825600  | 0.99766600  | C | -5.12851700  | 4.87751400  | 0.35957800  |
| H  | -0.05244500 | -0.33861800 | 1.12232100  | H | -5.79757300  | 5.13570400  | 1.18389700  |
| O  | 0.45599700  | 0.58014500  | -0.65312500 | H | -4.41048600  | 5.69229900  | 0.25568000  |
| O  | 3.42526200  | -2.11208900 | -0.40706600 | H | -5.71395500  | 4.79799400  | -0.55836100 |
| C  | 1.66918200  | 2.58510500  | -0.68710700 | N | 0.81273000   | -2.90852000 | 0.51741200  |
| H  | 1.69946200  | 2.50343900  | -1.78453800 | H | 0.90703300   | -3.75682200 | -0.01630300 |
| H  | 2.56873900  | 3.10827400  | -0.35542800 | C | 0.33726000   | -4.41487900 | 2.37536900  |
| H  | 4.33536000  | -1.79928200 | -0.27959300 | H | 0.80571400   | -4.55189800 | 3.34978700  |
| O  | 0.55840000  | 3.35151900  | -0.26498700 | H | -0.74552000  | -4.49973100 | 2.50538100  |
| H  | -0.22470200 | 2.77542500  | -0.20541400 | H | 0.66773600   | -5.20833900 | 1.70068800  |
| C  | -2.72181200 | 0.88735700  | -0.08708400 | C | 0.64598000   | -3.01885300 | 1.87008500  |
| C  | -4.18170800 | 1.17783500  | 0.32630200  | O | 0.68810600   | -2.05251300 | 2.62048500  |
| C  | -2.36381900 | -0.58884900 | 0.18118300  | C | -4.38307000  | 3.61219300  | 0.71867700  |
| H  | -2.61603000 | 1.06990500  | -1.16501300 | O | -3.59572100  | 3.57323700  | 1.66088600  |
| C  | -5.12627600 | 0.13718500  | -0.28522300 | C | 5.17521600   | 0.84123400  | -0.43694100 |
| H  | -4.26741100 | 1.09145000  | 1.41480100  | C | 6.08081200   | 1.85395200  | 0.28196200  |
| C  | -3.43779000 | -1.53512200 | -0.37517200 | H | 5.02754500   | 1.15121000  | -1.48451600 |
| H  | -2.26576200 | -0.74184100 | 1.26111500  | C | 7.01930400   | -0.55199300 | -1.07344300 |
| H  | -5.11923000 | 0.20203800  | -1.38723000 | C | 7.51658500   | 1.76465500  | -0.23694000 |
| H  | -3.42227300 | -1.47542600 | -1.47452500 | H | 5.68097800   | 2.85916100  | 0.09291500  |
| O  | -4.73524800 | -1.15836200 | 0.10665200  | C | 7.99455300   | 0.31207500  | -0.26923800 |
| O  | -6.41107000 | 0.39070800  | 0.19846800  | H | 6.94344200   | -0.17052900 | -2.10209300 |
| O  | -1.16438500 | -1.00286200 | -0.47404500 | H | 7.56189400   | 2.16397500  | -1.25538300 |
| C  | -3.24148600 | -2.99293600 | 0.02549000  | H | 8.03157500   | -0.07771800 | 0.75588800  |
| H  | -4.01960800 | -3.59570600 | -0.46031900 | O | 5.73610900   | -0.47328800 | -0.43165600 |
| H  | -2.26868800 | -3.33151700 | -0.32750800 | O | 9.28540900   | 0.22337400  | -0.86993300 |
| O  | -3.25230900 | -3.19051000 | 1.43019500  | O | 8.40593100   | 2.56597200  | 0.53133000  |
| H  | -4.11403100 | -2.92174500 | 1.77344000  | O | 6.14429300   | 1.60865000  | 1.67943200  |
| O  | -1.81326300 | 1.74277200  | 0.59611100  | C | 7.42739900   | -2.02563400 | -1.13984500 |
| H  | -2.29776900 | 2.36392900  | 1.17438200  | H | 7.63866200   | -2.39448900 | -0.12612200 |
| O  | 3.97193300  | 0.81912600  | 0.25296700  | H | 6.59730500   | -2.60886400 | -1.54320900 |
| C  | -7.51025200 | -0.14753400 | -0.44734600 | O | 8.52519300   | -2.23131800 | -2.00876800 |
| C  | -7.44432300 | -1.16526900 | -1.39858600 | H | 9.23868700   | -1.63198600 | -1.74484700 |
| C  | -8.74175700 | 0.39737800  | -0.07859500 | H | 9.85343700   | 0.88806100  | -0.45675600 |
| C  | -8.62428200 | -1.61695400 | -1.99366200 | H | 8.14607500   | 2.48481100  | 1.46091200  |
| H  | -6.50013200 | -1.62833100 | -1.65272200 | H | 5.24822800   | 1.48308300  | 2.01872600  |
| C  | -9.90858600 | -0.06986500 | -0.67251400 |   |              |             |             |

|    |             |             |             |   |             |             |             |
|----|-------------|-------------|-------------|---|-------------|-------------|-------------|
| 02 |             |             |             | H | 8.58576400  | -0.97571600 | 1.69037800  |
| C  | -2.55780700 | 1.09038000  | -0.08478000 | C | 10.04448600 | 0.86792100  | -0.77752300 |
| C  | -1.12976700 | 1.50670100  | -0.48988500 | H | 8.95668900  | 1.97433700  | -2.26759700 |
| C  | -0.07064900 | 0.50652300  | -0.00113500 | H | 10.82949400 | -0.31908200 | 0.84207400  |
| C  | -1.65313500 | -1.25840000 | 0.19278500  | H | 11.02001500 | 1.15477000  | -1.15525600 |
| C  | -2.82303500 | -0.40802300 | -0.31811000 | H | -2.97390800 | -0.58734500 | -1.38967200 |
| H  | -1.08089600 | 1.49665900  | -1.58196200 | N | 4.57479900  | -2.55410100 | 0.52078500  |
| H  | -2.68799900 | 1.28118300  | 0.98607000  | H | 4.61270700  | -3.09179900 | 1.37042900  |
| H  | -1.57535300 | -1.14732900 | 1.28421900  | C | 5.06913200  | -4.68702200 | -0.55664100 |
| H  | 0.01859800  | 0.51743500  | 1.08844300  | H | 4.28497700  | -5.27178200 | -1.04256200 |
| O  | -0.45866800 | -0.80362900 | -0.42794800 | H | 5.99563500  | -4.86714500 | -1.10518900 |
| O  | -3.43481400 | 1.90407800  | -0.84753700 | H | 5.19131200  | -5.04277300 | 0.46856200  |
| C  | -1.76845600 | -2.73579000 | -0.13174200 | N | -0.82397000 | 2.86868500  | -0.07175100 |
| H  | -1.73707400 | -2.87306000 | -1.21981800 | H | -0.76803300 | 3.56833800  | -0.79285900 |
| H  | -2.71475400 | -3.12872100 | 0.25420700  | C | -0.29990800 | 4.71656900  | 1.42701500  |
| H  | -4.34774200 | 1.69200400  | -0.59530700 | H | -0.73214200 | 5.08133200  | 2.35821000  |
| O  | -0.65776500 | -3.37896600 | 0.49354600  | H | 0.78988900  | 4.76091400  | 1.51237000  |
| H  | -0.59458700 | -4.29314500 | 0.19653600  | H | -0.60860600 | 5.36757100  | 0.60520400  |
| C  | 2.70721100  | -0.95727200 | 0.14017700  | C | -0.69898000 | 3.26837600  | 1.22944200  |
| C  | 4.14962400  | -1.16429900 | 0.64757500  | O | -0.85116200 | 2.49759200  | 2.16917800  |
| C  | 2.33851500  | 0.53544100  | 0.13263800  | C | 4.71761200  | -3.21366300 | -0.66316700 |
| H  | 2.62409900  | -1.33476900 | -0.88324900 | O | 4.58527500  | -2.66421200 | -1.75013400 |
| C  | 5.15647000  | -0.19453300 | 0.01135700  | C | -5.22692100 | -0.88001300 | -0.25256700 |
| H  | 4.14935700  | -0.94063700 | 1.71759700  | C | -6.12415900 | -1.83063800 | 0.55686800  |
| C  | 3.43502800  | 1.36545300  | -0.54682700 | H | -5.10900100 | -1.26072000 | -1.28040100 |
| H  | 2.21017600  | 0.88484300  | 1.16252300  | C | -7.07476700 | 0.49074800  | -0.92670400 |
| H  | 5.33301600  | -0.43804400 | -1.04118100 | C | -7.57368300 | -1.75835400 | 0.07426000  |
| H  | 3.51587100  | 1.06019300  | -1.60134300 | H | -5.74235100 | -2.85210600 | 0.42295000  |
| O  | 4.67821800  | 1.14034500  | 0.12421500  | C | -8.03577800 | -0.30508300 | -0.03946300 |
| O  | 6.34157100  | -0.28983600 | 0.74735300  | H | -7.03354200 | 0.04195500  | -1.92966900 |
| O  | 1.13999800  | 0.80579400  | -0.60858900 | H | -7.65336000 | -2.22295400 | -0.91395200 |
| C  | 3.19285800  | 2.86946600  | -0.50224100 | H | -8.03704600 | 0.15103800  | 0.95854700  |
| H  | 4.00831000  | 3.36897400  | -1.04074100 | O | -5.77252200 | 0.43761600  | -0.31793700 |
| H  | 2.25383200  | 3.10071400  | -1.00305200 | O | -9.34154900 | -0.23730000 | -0.60827300 |
| O  | 3.08031000  | 3.37517100  | 0.82072300  | O | -8.44721700 | -2.49808500 | 0.91815900  |
| H  | 3.89609900  | 3.16740100  | 1.29466800  | O | -6.14315100 | -1.49436700 | 1.93613900  |
| O  | 1.88737900  | -1.71180700 | 1.02248600  | C | -7.46936500 | 1.96229000  | -1.07789200 |
| H  | 1.08693400  | -2.02090400 | 0.57147900  | H | -7.65227300 | 2.39776700  | -0.08551100 |
| O  | -4.00266800 | -0.83210800 | 0.40404100  | H | -6.64468500 | 2.51018300  | -1.53809900 |
| C  | 7.53024900  | 0.12872200  | 0.18935800  | O | -8.58509800 | 2.12285400  | -1.93245600 |
| C  | 7.62527000  | 0.96704400  | -0.92188800 | H | -9.30134900 | 1.55742900  | -1.60832600 |
| C  | 8.68644300  | -0.32955000 | 0.82530900  | H | -9.90802800 | -0.86202400 | -0.13510000 |
| C  | 8.88677300  | 1.32374600  | -1.40153300 | H | -8.17101100 | -2.34702300 | 1.83414300  |
| H  | 6.73471500  | 1.36000800  | -1.39443000 | H | -5.24043600 | -1.32041100 | 2.23388200  |
| C  | 9.93603800  | 0.04246400  | 0.34295200  |   |             |             |             |

|    |             |             |             |   |              |             |             |
|----|-------------|-------------|-------------|---|--------------|-------------|-------------|
| 03 |             |             |             | H | -8.46167800  | -1.66531400 | -1.58821100 |
| C  | 2.55376200  | 1.08596500  | 0.35883300  | C | -9.99805800  | 1.12271000  | -0.36992100 |
| C  | 1.12571400  | 1.33431800  | 0.89393300  | H | -8.97645500  | 2.73108200  | 0.62876500  |
| C  | 0.06664400  | 0.66149200  | 0.00998400  | H | -10.71340000 | -0.62532300 | -1.40936000 |
| C  | 1.63364800  | -0.93398200 | -0.86645000 | H | -10.97803100 | 1.57991500  | -0.28538900 |
| C  | 2.79965500  | -0.38010800 | -0.04149300 | H | 2.93550400   | -0.98654800 | 0.86231900  |
| H  | 1.05117400  | 0.85313700  | 1.87242000  | N | -4.69279000  | -2.67488000 | 0.65304800  |
| H  | 2.70102400  | 1.69385400  | -0.54061500 | H | -4.69529400  | -3.53282500 | 0.12723100  |
| H  | 1.56987500  | -0.39945200 | -1.82380900 | C | -5.42799300  | -4.09443100 | 2.49765800  |
| H  | 0.01299800  | 1.10995700  | -0.98762300 | H | -4.69547600  | -4.43475200 | 3.23326100  |
| O  | 0.43485700  | -0.71883400 | -0.12014400 | H | -6.38422600  | -3.99105500 | 3.01323700  |
| O  | 3.42890000  | 1.50686600  | 1.39311000  | H | -5.52411600  | -4.85523500 | 1.72026500  |
| C  | 1.70028500  | -2.43193800 | -1.14181200 | N | 0.87699400   | 2.75388400  | 1.11692000  |
| H  | 1.73036500  | -2.97491700 | -0.18560300 | H | 0.91928900   | 3.06778300  | 2.07283200  |
| H  | 2.61158000  | -2.66356400 | -1.69398500 | C | 0.83753300   | 5.14039100  | 0.60330000  |
| H  | 4.34335200  | 1.32912400  | 1.11871400  | H | 1.83143200   | 5.58928600  | 0.52424400  |
| O  | 0.62400500  | -2.87442300 | -1.94655400 | H | 0.17388600   | 5.69540300  | -0.06022700 |
| H  | -0.21131700 | -2.71953600 | -1.48269700 | H | 0.49058500   | 5.24834400  | 1.63320500  |
| C  | -2.79475600 | -1.07658300 | 0.53445400  | C | 0.91388500   | 3.70044800  | 0.13141700  |
| C  | -4.16454200 | -1.49419500 | -0.02082900 | O | 1.00337600   | 3.41100400  | -1.05383600 |
| C  | -2.30234000 | 0.23205000  | -0.09423900 | C | -5.00209300  | -2.73283100 | 1.98081600  |
| H  | -2.88263900 | -0.91616800 | 1.61433300  | O | -4.94758300  | -1.75462800 | 2.71542400  |
| C  | -5.15802800 | -0.32079700 | -0.00435000 | C | 5.17573000   | -0.89993300 | -0.28219300 |
| H  | -4.03343800 | -1.76974200 | -1.07051000 | C | 6.09262500   | -1.35113700 | -1.42981200 |
| C  | -3.39069500 | 1.31142400  | -0.04593900 | H | 4.99982300   | -1.74172300 | 0.40765200  |
| H  | -2.01483300 | 0.06269500  | -1.13571300 | C | 7.01119100   | -0.13383800 | 1.05621000  |
| H  | -5.43976300 | -0.05494400 | 1.01938900  | C | 7.51222000   | -1.60386800 | -0.92027000 |
| H  | -3.58568800 | 1.58300600  | 1.00218200  | H | 5.67959300   | -2.27837800 | -1.84929700 |
| O  | -4.58233700 | 0.80456900  | -0.65756900 | C | 8.00023000   | -0.42569800 | -0.07657200 |
| O  | -6.27529500 | -0.71711300 | -0.74215800 | H | 6.90804100   | -1.02004100 | 1.69878400  |
| O  | -1.16223100 | 0.70495800  | 0.65682600  | H | 7.52180500   | -2.50289200 | -0.29566100 |
| C  | -3.03330400 | 2.56839100  | -0.83346900 | H | 8.06718100   | 0.46694900  | -0.71128700 |
| H  | -3.82630000 | 3.31255300  | -0.68563700 | O | 5.74065700   | 0.18117000  | 0.45909500  |
| H  | -2.09686500 | 2.98704000  | -0.46514100 | O | 9.27340600   | -0.71203400 | 0.49772400  |
| O  | -2.84294100 | 2.29760800  | -2.21225800 | O | 8.41652700   | -1.86598300 | -1.98564900 |
| H  | -3.66399600 | 1.92334300  | -2.55782000 | O | 6.20229300   | -0.36194500 | -2.44249800 |
| O  | -1.90418400 | -2.16113300 | 0.28174300  | C | 7.42960200   | 1.04736800  | 1.93528500  |
| H  | -1.01377600 | -1.86441900 | 0.52505700  | H | 7.67753400   | 1.90916000  | 1.29969700  |
| O  | 3.98553900  | -0.47514200 | -0.86127900 | H | 6.59221000   | 1.33166600  | 2.57567500  |
| C  | -7.47359800 | -0.05247700 | -0.58293600 | O | 8.49887300   | 0.70983900  | 2.79730500  |
| C  | -7.60794800 | 1.19034400  | 0.03616800  | H | 9.21967200   | 0.34742600  | 2.26171300  |
| C  | -8.59324400 | -0.70253300 | -1.10685700 | H | 9.84999700   | -1.04770300 | -0.20229700 |
| C  | -8.87558500 | 1.76494000  | 0.14453600  | H | 8.19554200   | -1.26830600 | -2.71508800 |
| H  | -6.74075400 | 1.71992700  | 0.40778100  | H | 5.31942600   | -0.05282100 | -2.68384100 |
| C  | -9.84790100 | -0.11337100 | -1.00095000 |   |              |             |             |



|    |             |             |             |   |              |             |             |
|----|-------------|-------------|-------------|---|--------------|-------------|-------------|
| 04 |             |             |             | H | -8.54062900  | -1.59813200 | -0.82646400 |
| C  | 2.48435600  | 1.33433400  | -0.04330200 | C | -9.58084400  | -0.36198100 | 2.17382100  |
| C  | 1.09441500  | 1.95047400  | 0.23795200  | H | -8.35767200  | 0.82398000  | 3.48693600  |
| C  | -0.03697600 | 1.07689500  | -0.32313500 | H | -10.54162300 | -1.54176100 | 0.64638400  |
| C  | 1.30686900  | -0.87736200 | -0.36468600 | H | -10.44994900 | -0.33572700 | 2.82214800  |
| C  | 2.54004700  | -0.18404200 | 0.22169300  | H | 2.59051800   | -0.36456600 | 1.30229600  |
| H  | 0.95645900  | 1.96711300  | 1.32206900  | N | -4.20633100  | -2.26744300 | -1.07301400 |
| H  | 2.72308000  | 1.48378100  | -1.10226600 | H | -4.97440800  | -2.54504000 | -1.66272300 |
| H  | 1.31515400  | -0.75614700 | -1.45831400 | C | -3.98314200  | -4.67346200 | -0.82604800 |
| H  | -0.03636400 | 1.05014500  | -1.41505800 | H | -3.17433900  | -5.16704200 | -1.37045600 |
| O  | 0.16453000  | -0.24274700 | 0.18546000  | H | -4.15284600  | -5.23973300 | 0.09102300  |
| O  | 3.39692600  | 2.04842400  | 0.77715400  | H | -4.88613700  | -4.70705700 | -1.43867700 |
| C  | 1.16343400  | -2.36195200 | -0.05401100 | N | 1.02363500   | 3.33719300  | -0.20761700 |
| H  | 1.07629300  | -2.50764200 | 1.02817500  | H | 1.07687600   | 4.04390800  | 0.50681600  |
| H  | 2.04295700  | -2.90398700 | -0.40930800 | C | 1.08617200   | 5.23498100  | -1.74231500 |
| H  | 4.28666500  | 1.68703800  | 0.63533600  | H | 1.95007600   | 5.51063200  | -2.34976300 |
| O  | 0.01862500  | -2.87940900 | -0.72935700 | H | 0.19017200   | 5.48592900  | -2.31438700 |
| H  | -0.70223800 | -3.08191100 | -0.11042800 | H | 1.09245300   | 5.82741900  | -0.82497500 |
| C  | -2.56676100 | -0.39456200 | -0.69878000 | C | 1.10957400   | 3.73532500  | -1.51063800 |
| C  | -4.02035600 | -0.81732500 | -0.97812900 | O | 1.17989000   | 2.94285600  | -2.44102000 |
| C  | -2.45903900 | 1.13006300  | -0.50343400 | C | -3.53079500  | -3.27182000 | -0.45841000 |
| H  | -2.21891000 | -0.87447000 | 0.21274100  | O | -2.60114000  | -3.10503600 | 0.33261900  |
| C  | -4.99332100 | -0.19689800 | 0.02956500  | C | 4.84266500   | -0.99532700 | 0.35706800  |
| H  | -4.29481600 | -0.41267400 | -1.95743100 | C | 5.68973000   | -2.02531200 | -0.40660900 |
| C  | -3.56677500 | 1.67576600  | 0.41327400  | H | 4.57347800   | -1.39730800 | 1.34776500  |
| H  | -2.50480200 | 1.62200500  | -1.48100700 | C | 6.76666700   | 0.09002900  | 1.28748100  |
| H  | -4.81177000 | -0.57438900 | 1.04708800  | C | 7.07260400   | -2.16946400 | 0.22973400  |
| H  | -3.35982000 | 1.33466500  | 1.43853900  | H | 5.16342200   | -2.98874500 | -0.36973600 |
| O  | -4.85865000 | 1.21052300  | 0.00407300  | C | 7.70689300   | -0.79803600 | 0.46744100  |
| O  | -6.29075200 | -0.52266700 | -0.38360600 | H | 6.55736900   | -0.38353800 | 2.25762600  |
| O  | -1.25305600 | 1.53180200  | 0.17335600  | H | 6.97913800   | -2.67662300 | 1.19554400  |
| C  | -3.65826000 | 3.19857600  | 0.41413000  | H | 7.88215300   | -0.30969200 | -0.49959400 |
| H  | -4.39470100 | 3.50538800  | 1.16836200  | O | 5.54385200   | 0.23519100  | 0.54542900  |
| H  | -2.69038000 | 3.62019100  | 0.68248000  | O | 8.93810800   | -0.93182700 | 1.17497600  |
| O  | -3.99296900 | 3.72473000  | -0.85996100 | O | 7.93143500   | -2.98882700 | -0.55377400 |
| H  | -4.84351900 | 3.35176100  | -1.12537500 | O | 5.90763900   | -1.63938000 | -1.75560600 |
| O  | -1.77995800 | -0.80267500 | -1.80756700 | C | 7.33135900   | 1.48831100  | 1.55118200  |
| H  | -1.14598700 | -1.48421500 | -1.52461600 | H | 7.67231200   | 1.93182300  | 0.60503300  |
| O  | 3.70988100  | -0.75747800 | -0.40924400 | H | 6.54058100   | 2.12422100  | 1.95406800  |
| C  | -7.34069600 | -0.42705900 | 0.50812900  | O | 8.36310900   | 1.46644700  | 2.51896100  |
| C  | -7.28257100 | 0.26517900  | 1.71789400  | H | 9.02588900   | 0.81677700  | 2.24242200  |
| C  | -8.51688800 | -1.07376700 | 0.12261300  | H | 9.46526400   | -1.61122300 | 0.73267100  |
| C  | -8.40605600 | 0.28442300  | 2.54645900  | H | 7.77591500   | -2.77274900 | -1.48505600 |
| H  | -6.39115000 | 0.80795900  | 2.00316100  | H | 5.06830100   | -1.36219500 | -2.14590900 |
| C  | -9.63119800 | -1.03696100 | 0.95308300  |   |              |             |             |

|    |             |             |             |   |             |             |             |
|----|-------------|-------------|-------------|---|-------------|-------------|-------------|
| P1 |             |             |             | H | -7.33247500 | -1.46058400 | 2.81853900  |
| C  | 2.38362700  | 1.22712600  | -0.96539800 | C | -8.70814300 | -3.43724900 | 0.40774400  |
| C  | 0.85859200  | 1.46911300  | -0.89752500 | H | -7.88159600 | -3.70651800 | -1.55973700 |
| C  | 0.12788000  | 0.61143100  | -1.95328300 | H | -9.26282800 | -2.97904600 | 2.43994300  |
| C  | 1.85766400  | -1.06528200 | -1.88305900 | H | -9.54812200 | -4.10161000 | 0.23736500  |
| C  | 2.66420900  | -0.27378300 | -0.84255400 | H | 2.40265900  | -0.61638200 | 0.16153900  |
| H  | 0.53234700  | 1.14546500  | 0.09712200  | N | -5.02566300 | 1.81506400  | 1.07274800  |
| H  | 2.76677300  | 1.56455600  | -1.93502100 | H | -5.83923200 | 1.34376000  | 1.44272100  |
| H  | 2.23306500  | -0.80594400 | -2.88554400 | C | -6.28861700 | 3.77551700  | 1.75808100  |
| H  | 0.39741100  | 0.96554100  | -2.95692200 | H | -6.07582400 | 4.23272500  | 2.72718100  |
| O  | 0.46496200  | -0.74917700 | -1.79967400 | H | -6.60421000 | 4.57497000  | 1.08595400  |
| O  | 3.03765400  | 1.92458100  | 0.07341900  | H | -7.10809900 | 3.06443500  | 1.87495300  |
| C  | 1.95292100  | -2.57937100 | -1.70175900 | N | 0.43892300  | 2.86202500  | -1.04792600 |
| H  | 2.99465700  | -2.88634300 | -1.80595200 | H | -0.53166800 | 2.98337100  | -0.77594100 |
| H  | 1.38350200  | -3.06140300 | -2.50762600 | C | 0.34370100  | 5.25513300  | -1.42036700 |
| H  | 3.14804500  | 2.83310800  | -0.25671600 | H | 0.76081900  | 5.97176800  | -0.70982000 |
| O  | 1.51236600  | -3.01265700 | -0.43172000 | H | 0.45775200  | 5.68563500  | -2.41764000 |
| H  | 0.54526700  | -2.92067800 | -0.38349100 | H | -0.71902300 | 5.12253000  | -1.21107200 |
| C  | -2.91562500 | 1.36844100  | -0.31350300 | C | 1.15415600  | 3.97268200  | -1.35173500 |
| C  | -3.95558100 | 0.86613100  | 0.71345900  | O | 2.36812200  | 3.99797400  | -1.56516700 |
| C  | -2.01763200 | 0.21626000  | -0.80912300 | C | -5.00941100 | 3.16621700  | 1.22096200  |
| H  | -3.44592100 | 1.77728000  | -1.18651100 | O | -4.05379900 | 3.89127100  | 0.94459100  |
| C  | -4.67404700 | -0.37188800 | 0.15219400  | C | 4.77686000  | -1.09080600 | -0.03086000 |
| H  | -3.42101500 | 0.55938000  | 1.61979300  | C | 6.11133800  | -1.61019800 | -0.57746100 |
| C  | -2.86332500 | -0.99053500 | -1.25602700 | H | 4.22308400  | -1.92357600 | 0.43437600  |
| H  | -1.34955000 | -0.09524900 | -0.00378100 | C | 5.69468400  | -0.45798400 | 2.07853200  |
| H  | -5.26902200 | -0.09235900 | -0.73218800 | C | 7.02324900  | -1.99499100 | 0.59164700  |
| H  | -3.45023800 | -0.69671600 | -2.13991200 | H | 5.92166700  | -2.49479700 | -1.20062700 |
| O  | -3.75137500 | -1.37256900 | -0.19160200 | C | 7.09895800  | -0.89124000 | 1.65764700  |
| O  | -5.51717600 | -0.85607800 | 1.15967700  | H | 5.17780200  | -1.29451100 | 2.57268300  |
| O  | -1.28010500 | 0.71070900  | -1.93462800 | H | 6.63199800  | -2.89967000 | 1.06828800  |
| C  | -2.09246700 | -2.25756600 | -1.59981800 | H | 7.61495500  | -0.02280600 | 1.22629000  |
| H  | -2.80174100 | -3.00349900 | -1.97710900 | O | 4.97233000  | -0.06738900 | 0.90902400  |
| H  | -1.35571500 | -2.04566200 | -2.36850000 | O | 7.79510000  | -1.35854200 | 2.80592600  |
| O  | -1.37785900 | -2.78252800 | -0.48489500 | O | 8.33132300  | -2.33736900 | 0.14036400  |
| H  | -2.00423200 | -3.01133300 | 0.21303000  | O | 6.80043500  | -0.62467400 | -1.33818100 |
| O  | -2.05720500 | 2.34545700  | 0.23891600  | C | 5.65216600  | 0.77329400  | 2.98096700  |
| H  | -2.62534500 | 3.08855300  | 0.54537900  | H | 6.04419300  | 0.52866300  | 3.96817200  |
| O  | 4.04918800  | -0.55657900 | -1.10219000 | H | 6.28479400  | 1.55770200  | 2.54200100  |
| C  | -6.54617200 | -1.73050200 | 0.84241000  | O | 4.32442200  | 1.23507500  | 3.15400400  |
| C  | -6.68479400 | -2.36512900 | -0.39078900 | H | 3.94676000  | 1.39039400  | 2.27355300  |
| C  | -7.47157700 | -1.95418900 | 1.86284700  | H | 8.62200200  | -1.75723300 | 2.50252200  |
| C  | -7.77516900 | -3.21212500 | -0.59965700 | H | 8.58738800  | -1.68591900 | -0.52863300 |
| H  | -5.94745600 | -2.23439700 | -1.17153200 | H | 6.15519300  | -0.10115700 | -1.83127000 |
| C  | -8.54722900 | -2.80718900 | 1.64267000  |   |             |             |             |

|    |             |             |             |   |             |             |             |
|----|-------------|-------------|-------------|---|-------------|-------------|-------------|
| P2 |             |             |             | H | -7.50821900 | -1.24618500 | 2.79414500  |
| C  | 2.37961600  | 1.10672000  | -0.96374900 | C | -8.82313300 | -3.33197800 | 0.44207800  |
| C  | 0.85560500  | 1.35829400  | -0.89777400 | H | -7.92562400 | -3.72111600 | -1.47360500 |
| C  | 0.11529000  | 0.45045200  | -1.90234400 | H | -9.44753200 | -2.75482600 | 2.42314600  |
| C  | 1.82401400  | -1.23643200 | -1.73544100 | H | -9.66693000 | -3.99234800 | 0.27500800  |
| C  | 2.66362100  | -0.38881200 | -0.76550200 | H | 2.43239800  | -0.67586000 | 0.26486100  |
| H  | 0.53457200  | 1.08627600  | 0.11422200  | N | -5.07352500 | 1.89335800  | 0.96362500  |
| H  | 2.76121100  | 1.38939200  | -1.95038000 | H | -5.91751500 | 1.45450700  | 1.30426800  |
| H  | 2.19291400  | -1.05220900 | -2.75593300 | C | -6.30309100 | 3.90456800  | 1.55837600  |
| H  | 0.39147700  | 0.73982000  | -2.92479200 | H | -6.12485000 | 4.37043400  | 2.53033000  |
| O  | 0.43452200  | -0.90016600 | -1.66323600 | H | -6.55762500 | 4.70257300  | 0.85921000  |
| O  | 3.03171600  | 1.87459700  | 0.03062700  | H | -7.15041700 | 3.22212900  | 1.64349000  |
| C  | 1.90391500  | -2.73511900 | -1.45009500 | N | 0.43900200  | 2.74388500  | -1.11578900 |
| H  | 2.94326700  | -3.05595600 | -1.52726500 | H | -0.53003200 | 2.88093200  | -0.84625400 |
| H  | 1.33299400  | -3.26673600 | -2.22321000 | C | 0.33695400  | 5.11589800  | -1.60071600 |
| H  | 3.14667400  | 2.75605700  | -0.36670200 | H | 0.74968000  | 5.86284600  | -0.91929300 |
| O  | 1.45219500  | -3.07790600 | -0.15496100 | H | 0.45352400  | 5.50439500  | -2.61472800 |
| H  | 0.48697500  | -2.96813400 | -0.11751600 | H | -0.72614400 | 4.98931900  | -1.38928000 |
| C  | -2.93233100 | 1.33678300  | -0.33073700 | C | 1.15120300  | 3.83956300  | -1.47527400 |
| C  | -4.00953500 | 0.90867900  | 0.69305800  | O | 2.36396700  | 3.85968600  | -1.69463300 |
| C  | -2.04562600 | 0.14667900  | -0.75262500 | C | -5.01902200 | 3.24519900  | 1.09696500  |
| H  | -3.43466200 | 1.71400700  | -1.23416100 | O | -4.02592700 | 3.93318300  | 0.86213900  |
| C  | -4.73176800 | -0.34605900 | 0.17679900  | C | 4.83147000  | -1.06013900 | 0.00206400  |
| H  | -3.50757300 | 0.64417700  | 1.63083100  | C | 6.10113800  | -1.77363500 | -0.47419200 |
| C  | -2.89943500 | -1.07401900 | -1.14298200 | H | 4.28840500  | -1.74693400 | 0.67597100  |
| H  | -1.38928400 | -0.12750000 | 0.07561000  | C | 5.87371700  | -0.10721400 | 1.92100800  |
| H  | -5.28901700 | -0.10633000 | -0.74325400 | C | 6.99618500  | -2.01183200 | 0.75334500  |
| H  | -3.46309500 | -0.82774400 | -2.05604600 | H | 5.81862100  | -2.74970100 | -0.89426800 |
| O  | -3.81665800 | -1.37844200 | -0.07764000 | C | 7.22745900  | -0.72761300 | 1.55330700  |
| O  | -5.62101700 | -0.75924700 | 1.17700000  | H | 5.31751900  | -0.79680600 | 2.57569700  |
| O  | -1.29262800 | 0.56992600  | -1.89632700 | H | 6.50990300  | -2.74136900 | 1.41727700  |
| C  | -2.13788400 | -2.36840200 | -1.39148400 | H | 7.78866200  | -0.01983200 | 0.93286900  |
| H  | -2.84947800 | -3.13001500 | -1.73142900 | O | 5.15416400  | 0.11203600  | 0.71534100  |
| H  | -1.38670900 | -2.21360200 | -2.15983800 | O | 8.00897500  | -1.11989500 | 2.69154100  |
| O  | -1.44585200 | -2.82686700 | -0.23404100 | O | 8.22439300  | -2.55030700 | 0.27300300  |
| H  | -2.08529300 | -3.01293900 | 0.46459300  | O | 6.76826400  | -0.99314700 | -1.44445900 |
| O  | -2.06422000 | 2.32037700  | 0.19427700  | C | 5.92196200  | 1.27278500  | 2.57331100  |
| H  | -2.62001600 | 3.08051100  | 0.48003300  | H | 6.34929100  | 1.21237700  | 3.57774900  |
| O  | 4.02626500  | -0.70872800 | -1.07374300 | H | 6.55735000  | 1.93217100  | 1.96227100  |
| C  | -6.65070500 | -1.63552400 | 0.86820000  | O | 4.62290700  | 1.80794400  | 2.71324600  |
| C  | -6.75268200 | -2.33506700 | -0.33318000 | H | 4.17258200  | 1.74954800  | 1.85156900  |
| C  | -7.61854200 | -1.78955800 | 1.86198200  | H | 8.44765900  | -0.35012200 | 3.07001800  |
| C  | -7.84819800 | -3.17623500 | -0.53838200 | H | 8.84412600  | -2.56906900 | 1.01429900  |
| H  | -5.98384000 | -2.25883200 | -1.09035300 | H | 7.65041200  | -1.37475500 | -1.55342200 |
| C  | -8.69907000 | -2.63758400 | 1.64637400  |   |             |             |             |

|    |             |             |             |   |             |             |             |
|----|-------------|-------------|-------------|---|-------------|-------------|-------------|
| Q1 |             |             |             | H | 7.75353900  | -0.72452300 | -2.73415400 |
| C  | -2.34712200 | 0.65834300  | 0.49894800  | C | 9.23821500  | -2.60902700 | -0.31413700 |
| C  | -0.86788000 | 1.03860100  | 0.72213300  | H | 8.33305900  | -3.08797300 | 1.57741400  |
| C  | -0.14366500 | 0.13291000  | 1.73150700  | H | 9.85154600  | -1.97744500 | -2.28216300 |
| C  | -1.71284700 | -1.65927300 | 1.36877100  | H | 10.15097100 | -3.15852700 | -0.11167900 |
| C  | -2.49294900 | -0.86206900 | 0.31566500  | H | -2.13563000 | -1.14081000 | -0.68124700 |
| H  | -0.37857800 | 0.92228400  | -0.24668100 | N | 4.89377800  | 2.10359900  | -1.03499400 |
| H  | -2.94033200 | 0.96527400  | 1.36245400  | H | 5.79619500  | 1.76726000  | -1.34039800 |
| H  | -2.18432500 | -1.50481700 | 2.35160600  | C | 5.89482100  | 4.24211100  | -1.61137500 |
| H  | -0.48536000 | 0.34652800  | 2.74808500  | H | 5.70921100  | 4.65252900  | -2.60683300 |
| O  | -0.35211200 | -1.23046100 | 1.41461700  | H | 6.01084700  | 5.08612600  | -0.92995100 |
| O  | -2.75243600 | 1.35742700  | -0.67045100 | H | 6.82459500  | 3.67105800  | -1.63270500 |
| C  | -1.65910700 | -3.15962400 | 1.07457700  | N | -0.69691500 | 2.44001200  | 1.07644100  |
| H  | -2.67462400 | -3.55463700 | 1.02899100  | H | 0.04270700  | 2.90261700  | 0.56928000  |
| H  | -1.14097600 | -3.65472600 | 1.90717300  | C | -0.82842400 | 4.49038800  | 2.38026800  |
| H  | -3.66395100 | 1.67491900  | -0.58119100 | H | -1.73209000 | 5.10383200  | 2.38436300  |
| O  | -1.04181600 | -3.45790500 | -0.16061000 | H | -0.36232300 | 4.59371900  | 3.36254600  |
| H  | -0.09080300 | -3.26509000 | -0.09689400 | H | -0.14620900 | 4.87450600  | 1.61929400  |
| C  | 2.78660100  | 1.31710900  | 0.19365700  | C | -1.22574300 | 3.03781500  | 2.17547300  |
| C  | 3.94953300  | 0.99982000  | -0.77882000 | O | -1.98447900 | 2.47057900  | 2.95688400  |
| C  | 2.05451000  | 0.03366200  | 0.64079800  | C | 4.68198100  | 3.43784600  | -1.18621100 |
| H  | 3.19930700  | 1.79603800  | 1.09401200  | O | 3.60620600  | 4.00408100  | -0.99651400 |
| C  | 4.80187900  | -0.14909200 | -0.21860100 | C | -4.77139400 | -1.00990100 | -0.53604200 |
| H  | 3.51710800  | 0.66069100  | -1.72710300 | C | -5.85658400 | -2.09745400 | -0.52227800 |
| C  | 3.03774200  | -1.07488100 | 1.05771500  | H | -4.28151500 | -0.97816000 | -1.52119300 |
| H  | 1.44304700  | -0.33269400 | -0.18596600 | C | -6.29871700 | 0.68918600  | -1.20295000 |
| H  | 5.29558900  | 0.16770900  | 0.71430200  | C | -7.03623900 | -1.68881700 | -1.40654000 |
| H  | 3.54453500  | -0.76127000 | 1.98315400  | H | -5.41805000 | -3.02999300 | -0.90181900 |
| O  | 4.01257000  | -1.28298900 | 0.02248500  | C | -7.50015800 | -0.25315700 | -1.12313800 |
| O  | 5.76857400  | -0.46150900 | -1.18483900 | H | -5.86820200 | 0.64828700  | -2.21518300 |
| O  | 1.25168400  | 0.34898500  | 1.78313700  | H | -6.73222700 | -1.74052100 | -2.45733100 |
| C  | 2.41070500  | -2.44147600 | 1.29938500  | H | -7.91632800 | -0.20580700 | -0.10822200 |
| H  | 3.18441700  | -3.11940700 | 1.67879800  | O | -5.32833900 | 0.26303800  | -0.24711100 |
| H  | 1.61696100  | -2.35807400 | 2.03599500  | O | -8.47268000 | 0.15132500  | -2.07743700 |
| O  | 1.81684400  | -2.98702100 | 0.12483400  | O | -8.12746200 | -2.59518600 | -1.27878600 |
| H  | 2.49498800  | -3.08820300 | -0.55461400 | O | -6.37941400 | -2.30585100 | 0.78530200  |
| O  | 1.82000800  | 2.15299500  | -0.41169400 | C | -6.61577700 | 2.13428700  | -0.88157000 |
| H  | 2.28303200  | 2.97626300  | -0.68133000 | H | -7.39520100 | 2.49496700  | -1.55905400 |
| O  | -3.85528200 | -1.31650000 | 0.46430300  | H | -6.97119400 | 2.21033900  | 0.15290800  |
| C  | 6.88783200  | -1.19850800 | -0.83122400 | O | -5.39827100 | 2.86681300  | -1.05517000 |
| C  | 7.03598100  | -1.86862000 | 0.38220400  | H | -5.50723900 | 3.76766300  | -0.73234800 |
| C  | 7.89975100  | -1.24121900 | -1.79178600 | H | -9.12577200 | -0.55892600 | -2.14356200 |
| C  | 8.21971400  | -2.56570100 | 0.63297200  | H | -8.20800300 | -2.82348800 | -0.34118100 |
| H  | 6.23832500  | -1.88060200 | 1.11283400  | H | -5.64876500 | -2.28464200 | 1.41727900  |
| C  | 9.06916400  | -1.94661300 | -1.53097100 |   |             |             |             |

|    |             |             |             |   |             |             |             |
|----|-------------|-------------|-------------|---|-------------|-------------|-------------|
| Q2 |             |             |             | H | 7.77933100  | -0.75547500 | -2.70129600 |
| C  | -2.36537500 | 0.65590100  | 0.55497900  | C | 9.25130600  | -2.59197100 | -0.23701900 |
| C  | -0.87960900 | 1.03876600  | 0.71401300  | H | 8.33039000  | -3.04578000 | 1.65317900  |
| C  | -0.13900000 | 0.15741400  | 1.73415100  | H | 9.88009400  | -1.98848200 | -2.20898500 |
| C  | -1.70392800 | -1.64825900 | 1.41665200  | H | 10.16521800 | -3.13271700 | -0.01689600 |
| C  | -2.50107100 | -0.86406200 | 0.36624900  | H | -2.14310100 | -1.13479200 | -0.63388900 |
| H  | -0.41906200 | 0.88155100  | -0.26382600 | N | 4.89226400  | 2.08382100  | -1.08313500 |
| H  | -2.92137500 | 0.95301600  | 1.44588100  | H | 5.80476800  | 1.74518700  | -1.35408200 |
| H  | -2.16925000 | -1.48783800 | 2.40048900  | C | 5.88220200  | 4.20726900  | -1.73128900 |
| H  | -0.47085900 | 0.39393700  | 2.74976500  | H | 5.71508700  | 4.57535900  | -2.74634200 |
| O  | -0.34208000 | -1.21147700 | 1.44964500  | H | 5.97364800  | 5.07915800  | -1.08191200 |
| O  | -2.83600000 | 1.35953600  | -0.58929600 | H | 6.81828600  | 3.64662000  | -1.70854500 |
| C  | -1.65315700 | -3.14981700 | 1.13583600  | N | -0.67876000 | 2.44961400  | 1.01149500  |
| H  | -2.67127600 | -3.53716100 | 1.10167700  | H | 0.08181100  | 2.86586000  | 0.49417300  |
| H  | -1.12960100 | -3.63960900 | 1.96826000  | C | -0.75337000 | 4.56355400  | 2.21027900  |
| H  | -3.72850900 | 1.69964400  | -0.42906500 | H | -1.63400400 | 5.20885800  | 2.17799600  |
| O  | -1.04250200 | -3.46075100 | -0.10204900 | H | -0.29019000 | 4.69675400  | 3.19042000  |
| H  | -0.09213000 | -3.26597800 | -0.04508300 | H | -0.05261700 | 4.88670500  | 1.43781200  |
| C  | 2.78173500  | 1.31545200  | 0.15001500  | C | -1.20153900 | 3.11681800  | 2.07179400  |
| C  | 3.94977000  | 0.98201700  | -0.81099100 | O | -1.99097000 | 2.61980800  | 2.87025200  |
| C  | 2.05358700  | 0.04115200  | 0.63007700  | C | 4.66856800  | 3.40654600  | -1.30159800 |
| H  | 3.18947000  | 1.82018700  | 1.03849600  | O | 3.58101300  | 3.96581200  | -1.16621000 |
| C  | 4.80322500  | -0.15166500 | -0.22226200 | C | -4.77443900 | -1.02585700 | -0.43816700 |
| H  | 3.52343400  | 0.62217700  | -1.75435600 | C | -5.83300800 | -2.12893700 | -0.54745000 |
| C  | 3.03964000  | -1.05675700 | 1.06851400  | H | -4.28869800 | -0.90399900 | -1.41931900 |
| H  | 1.43813100  | -0.34421800 | -0.18498600 | C | -6.29957000 | 0.69651600  | -1.06147400 |
| H  | 5.29072600  | 0.18684100  | 0.70643800  | C | -6.91384000 | -1.67349600 | -1.53636900 |
| H  | 3.54493900  | -0.72402100 | 1.98804400  | H | -5.34732400 | -3.02974300 | -0.94736400 |
| O  | 4.01709600  | -1.28229700 | 0.03834300  | C | -7.46827700 | -0.29563100 | -1.17283300 |
| O  | 5.77770200  | -0.48006000 | -1.17598400 | H | -5.80207200 | 0.77418700  | -2.04145500 |
| O  | 1.25694300  | 0.38356700  | 1.76863000  | H | -6.47651700 | -1.60573200 | -2.54340600 |
| C  | 2.41640100  | -2.42048600 | 1.33502200  | H | -7.98195400 | -0.36348800 | -0.20779300 |
| H  | 3.19175800  | -3.08849400 | 1.72879800  | O | -5.38848400 | 0.21501800  | -0.08433100 |
| H  | 1.62067800  | -2.32553300 | 2.06804600  | O | -8.39872700 | 0.03611800  | -2.21427300 |
| O  | 1.82678200  | -2.98929000 | 0.16993000  | O | -7.93701000 | -2.66260300 | -1.52591800 |
| H  | 2.50665800  | -3.10139200 | -0.50600800 | O | -6.39192600 | -2.39133500 | 0.72514700  |
| O  | 1.81184300  | 2.13041200  | -0.47962500 | C | -6.68810800 | 2.09367100  | -0.61834300 |
| H  | 2.27266300  | 2.94026300  | -0.79071300 | H | -7.46058800 | 2.50075900  | -1.28260100 |
| O  | -3.84599400 | -1.34202700 | 0.53197300  | H | -7.07495200 | 2.05468200  | 0.40662000  |
| C  | 6.89773500  | -1.20389800 | -0.79949400 | O | -5.50698700 | 2.89411500  | -0.68772400 |
| C  | 7.03806000  | -1.85362400 | 0.42597500  | H | -5.59846100 | 3.67076400  | -0.12566600 |
| C  | 7.91941500  | -1.25598100 | -1.74929600 | H | -9.06256300 | 0.65007300  | -1.88300600 |
| C  | 8.22334700  | -2.53941800 | 0.69937300  | H | -8.66926400 | -2.33371300 | -2.06362700 |
| H  | 6.23319400  | -1.85913700 | 1.14871400  | H | -7.14180000 | -2.98570900 | 0.58641700  |
| C  | 9.09026400  | -1.95021500 | -1.46594300 |   |             |             |             |

|    |             |             |             |   |             |             |             |
|----|-------------|-------------|-------------|---|-------------|-------------|-------------|
| R1 |             |             |             | H | -7.07877900 | -1.74360700 | 2.84314900  |
| C  | 2.37669000  | 1.27350400  | -0.90039500 | C | -8.71620800 | -3.21823100 | 0.24390200  |
| C  | 0.87279100  | 1.58228800  | -0.93522700 | H | -8.03935300 | -3.17736400 | -1.79740800 |
| C  | 0.13812500  | 0.81955700  | -2.05671700 | H | -9.10754100 | -3.09529200 | 2.36034100  |
| C  | 1.87588600  | -0.86466800 | -2.14366200 | H | -9.59944500 | -3.80910500 | 0.02755200  |
| C  | 2.60291800  | -0.23982000 | -0.94934300 | H | 2.24142200  | -0.70628400 | -0.02921300 |
| H  | 0.46569400  | 1.25535500  | 0.02265700  | N | -4.70285100 | 1.68068000  | 1.49658700  |
| H  | 2.86500400  | 1.72273000  | -1.77096500 | H | -5.51961900 | 1.19598100  | 1.84102900  |
| H  | 2.29437600  | -0.45971600 | -3.07796000 | C | -5.80863100 | 3.56432200  | 2.56282500  |
| H  | 0.36655900  | 1.26978000  | -3.02598600 | H | -5.51538700 | 3.85583100  | 3.57396900  |
| O  | 0.48332400  | -0.55657000 | -2.05820400 | H | -6.11752900 | 4.47183100  | 2.04168400  |
| O  | 2.88846000  | 1.85094700  | 0.29518500  | H | -6.65843500 | 2.88229800  | 2.62351500  |
| C  | 1.96687200  | -2.38927900 | -2.18066200 | N | 0.58436800  | 3.00595900  | -1.01284800 |
| H  | 3.01184900  | -2.68416800 | -2.29226300 | H | -0.12923500 | 3.31759800  | -0.37160000 |
| H  | 1.42434000  | -2.74683000 | -3.06559000 | C | 0.53030200  | 5.27157900  | -1.90224400 |
| H  | 3.78953700  | 1.51769700  | 0.42332400  | H | 1.40485200  | 5.91013500  | -1.75683000 |
| O  | 1.48431600  | -2.99998500 | -1.00078800 | H | 0.06460400  | 5.56666100  | -2.84437400 |
| H  | 0.51618000  | -2.90612600 | -0.96630200 | H | -0.17008600 | 5.44863400  | -1.08362700 |
| C  | -2.69942200 | 1.37630100  | -0.07387000 | C | 0.99601200  | 3.83060800  | -2.01286900 |
| C  | -3.71528000 | 0.75301200  | 0.91443300  | O | 1.71042700  | 3.45981200  | -2.93955200 |
| C  | -1.92323700 | 0.28546900  | -0.84062700 | C | -4.59795300 | 2.98758200  | 1.85592400  |
| H  | -3.24512700 | 1.98002200  | -0.81387000 | O | -3.61825100 | 3.69978600  | 1.63856400  |
| C  | -4.53818100 | -0.33616300 | 0.20831000  | C | 4.65413300  | -1.09788300 | -0.00181700 |
| H  | -3.15054300 | 0.27044500  | 1.72044700  | C | 6.04761600  | -1.54561700 | -0.45934400 |
| C  | -2.85788000 | -0.80219500 | -1.39738500 | H | 4.08124000  | -1.96242000 | 0.36725000  |
| H  | -1.20486500 | -0.18314400 | -0.16533200 | C | 5.39172000  | -0.59090800 | 2.22417000  |
| H  | -5.16377500 | 0.11449600  | -0.57880300 | C | 6.89027100  | -1.96081700 | 0.74986700  |
| H  | -3.48038000 | -0.35548900 | -2.18758500 | H | 5.93381500  | -2.40148100 | -1.13809000 |
| O  | -3.69932100 | -1.31294800 | -0.35050400 | C | 6.84430300  | -0.91580200 | 1.87462700  |
| O  | -5.35118700 | -0.93630700 | 1.17916000  | H | 4.88362900  | -1.49750500 | 2.58239600  |
| O  | -1.26606800 | 0.89920400  | -1.95541300 | H | 6.50107100  | -2.90196900 | 1.15154400  |
| C  | -2.15788000 | -2.02400100 | -1.97890100 | H | 7.33674300  | 0.00281700  | 1.52789000  |
| H  | -2.91361600 | -2.67989600 | -2.42638700 | O | 4.74058800  | -0.12515500 | 1.03045000  |
| H  | -1.45329200 | -1.71664700 | -2.74617400 | O | 7.48807800  | -1.41508700 | 3.03782700  |
| O  | -1.40673100 | -2.74190900 | -1.00266000 | O | 8.23729400  | -2.23199500 | 0.37835500  |
| H  | -2.00354500 | -3.05054600 | -0.30951700 | O | 6.75711700  | -0.49852700 | -1.10926300 |
| O  | -1.74355100 | 2.16981900  | 0.60092800  | C | 5.22063400  | 0.50624700  | 3.26471600  |
| H  | -2.24295200 | 2.88526100  | 1.05271200  | H | 5.71133600  | 0.20277300  | 4.18895900  |
| O  | 4.01742400  | -0.50816600 | -1.09325100 | H | 5.70299200  | 1.42609600  | 2.90573500  |
| C  | -6.44263700 | -1.70031400 | 0.79642300  | O | 3.85665000  | 0.73284000  | 3.58056500  |
| C  | -6.69764000 | -2.10665200 | -0.51227300 | H | 3.39353300  | 1.04343900  | 2.79048800  |
| C  | -7.30792300 | -2.05935400 | 1.83115200  | H | 8.34525300  | -1.77133400 | 2.76680600  |
| C  | -7.84264300 | -2.86048700 | -0.77837900 | H | 8.51024000  | -1.55018000 | -0.25269600 |
| H  | -6.00850800 | -1.87270400 | -1.31268900 | H | 6.17781200  | -0.08502700 | -1.76241700 |
| C  | -8.43930100 | -2.81754300 | 1.55184400  |   |             |             |             |

|    |             |             |             |   |             |             |             |
|----|-------------|-------------|-------------|---|-------------|-------------|-------------|
| R2 |             |             |             | H | -7.03021900 | -1.86144700 | 2.78504700  |
| C  | 2.40788600  | 1.35563400  | -0.95095900 | C | -8.67023500 | -3.23356200 | 0.13187800  |
| C  | 0.90076700  | 1.64482100  | -0.93522600 | H | -7.99091300 | -3.12000900 | -1.90587900 |
| C  | 0.15417100  | 0.91160000  | -2.06904500 | H | -9.06330700 | -3.18715500 | 2.25109400  |
| C  | 1.90845800  | -0.75276700 | -2.23341900 | H | -9.55537500 | -3.81283100 | -0.10699200 |
| C  | 2.64254400  | -0.15651000 | -1.02887900 | H | 2.27648600  | -0.63883100 | -0.11815000 |
| H  | 0.52018100  | 1.27403400  | 0.01790300  | N | -4.64389500 | 1.59725800  | 1.58291900  |
| H  | 2.86945800  | 1.82306900  | -1.82602600 | H | -5.46139000 | 1.09857400  | 1.90480200  |
| H  | 2.31438400  | -0.31736200 | -3.15886000 | C | -5.73953000 | 3.42755600  | 2.74783100  |
| H  | 0.35920300  | 1.39937500  | -3.02522300 | H | -5.44275800 | 3.66771300  | 3.77136600  |
| O  | 0.51164900  | -0.45934500 | -2.12580300 | H | -6.04719000 | 4.36064000  | 2.27315600  |
| O  | 2.95267200  | 1.92068500  | 0.23850600  | H | -6.59123700 | 2.74577400  | 2.77691200  |
| C  | 2.01361300  | -2.27379500 | -2.31679700 | N | 0.58548800  | 3.06489600  | -0.94889200 |
| H  | 3.06112200  | -2.55187900 | -2.44379600 | H | -0.11168900 | 3.33869400  | -0.27352300 |
| H  | 1.46841800  | -2.61160800 | -3.20790600 | C | 0.45909600  | 5.36254900  | -1.74218600 |
| H  | 3.88017200  | 1.64658300  | 0.28735100  | H | 1.32685900  | 6.01267800  | -1.60802500 |
| O  | 1.54557700  | -2.92698900 | -1.15213900 | H | -0.05113300 | 5.68400600  | -2.65213200 |
| H  | 0.57766600  | -2.83970500 | -1.10595800 | H | -0.20976900 | 5.49368200  | -0.88909700 |
| C  | -2.65193800 | 1.36401400  | -0.01421200 | C | 0.94735700  | 3.93619700  | -1.92841400 |
| C  | -3.65996900 | 0.69663600  | 0.95375100  | O | 1.63407200  | 3.61775900  | -2.89370000 |
| C  | -1.88242400 | 0.31091400  | -0.83964800 | C | -4.53230200 | 2.88313800  | 2.00959000  |
| H  | -3.20462000 | 2.00192300  | -0.71960300 | O | -3.55026000 | 3.60172800  | 1.82739300  |
| C  | -4.48611800 | -0.36088900 | 0.20579900  | C | 4.66230600  | -1.04362200 | -0.10882300 |
| H  | -3.08886500 | 0.17947200  | 1.73335500  | C | 6.07648400  | -1.49748100 | -0.47233300 |
| C  | -2.81796400 | -0.75946000 | -1.42804800 | H | 4.07857000  | -1.92107800 | 0.21408500  |
| H  | -1.14906200 | -0.17926300 | -0.19633700 | C | 5.20550500  | -0.66093900 | 2.19616200  |
| H  | -5.11389100 | 0.12264900  | -0.55982100 | C | 6.73890600  | -2.05908400 | 0.79497500  |
| H  | -3.44881200 | -0.28552100 | -2.19539800 | H | 6.00363200  | -2.30206000 | -1.21717700 |
| O  | -3.64993800 | -1.31356700 | -0.39505200 | C | 6.66646800  | -1.07132200 | 1.96176300  |
| O  | -5.29791900 | -1.00016100 | 1.15349800  | H | 4.61502600  | -1.54542800 | 2.47716700  |
| O  | -1.24992500 | 0.97427300  | -1.93946400 | H | 6.21908000  | -2.97982100 | 1.09703700  |
| C  | -2.11689900 | -1.95419500 | -2.06140700 | H | 7.25447400  | -0.18197800 | 1.70875300  |
| H  | -2.87290000 | -2.59710900 | -2.52718400 | O | 4.70338500  | -0.11584000 | 0.97550200  |
| H  | -1.42042500 | -1.61383800 | -2.82223900 | O | 7.24814700  | -1.75342200 | 3.08091600  |
| O  | -1.35313800 | -2.70419400 | -1.11979100 | O | 8.08769500  | -2.35946600 | 0.45587600  |
| H  | -1.94162900 | -3.04115700 | -0.43281600 | O | 6.81346800  | -0.40761500 | -0.98778700 |
| O  | -1.68899800 | 2.12447700  | 0.68810500  | C | 4.99182000  | 0.42639000  | 3.24334700  |
| H  | -2.18214500 | 2.81616900  | 1.18112900  | H | 5.31898100  | 0.07208000  | 4.22353300  |
| O  | 4.05216500  | -0.41724700 | -1.18324600 | H | 5.59278000  | 1.30819200  | 2.97562000  |
| C  | -6.39151600 | -1.74510600 | 0.74201500  | O | 3.62567700  | 0.76385400  | 3.38391000  |
| C  | -6.64680400 | -2.10214500 | -0.58103400 | H | 3.28556700  | 1.08080800  | 2.53317900  |
| C  | -7.25941500 | -2.13895300 | 1.76189400  | H | 7.56183800  | -1.11583700 | 3.73136600  |
| C  | -7.79421400 | -2.84155500 | -0.87566900 | H | 8.54974900  | -2.59961400 | 1.26987100  |
| H  | -5.95574100 | -1.84137700 | -1.37140100 | H | 7.73666800  | -0.69046000 | -1.04226900 |
| C  | -8.39322700 | -2.88227700 | 1.45394300  |   |             |             |             |

|    |             |             |             |   |             |             |             |
|----|-------------|-------------|-------------|---|-------------|-------------|-------------|
| S1 |             |             |             | H | 8.28673100  | 0.46588800  | 1.34832300  |
| C  | -2.51425800 | 0.42301100  | -1.08182300 | C | 8.26900500  | -2.92224700 | 1.71834900  |
| C  | -1.29347600 | 1.04144100  | -1.78802700 | H | 6.62707400  | -4.19424800 | 1.15857500  |
| C  | 0.01592100  | 0.39713200  | -1.31851800 | H | 9.72633500  | -1.39452200 | 2.15439600  |
| C  | -1.06910800 | -1.67178600 | -0.81383100 | H | 8.89047800  | -3.73788800 | 2.07178200  |
| C  | -2.46537200 | -1.11529700 | -1.14105000 | H | -2.77149000 | -1.44371300 | -2.14008000 |
| H  | -1.37572700 | 0.80905600  | -2.85412400 | N | 4.16381100  | 2.22159300  | 1.52883400  |
| H  | -2.51492000 | 0.72070300  | -0.03613900 | H | 4.68467200  | 3.08082000  | 1.58243200  |
| H  | -0.88289800 | -1.52462900 | 0.26027700  | C | 3.76553900  | 2.59101500  | 3.90994700  |
| H  | 0.16957100  | 0.55439800  | -0.24195300 | H | 2.80200300  | 2.97243700  | 4.25502100  |
| O  | -0.05489500 | -1.00217400 | -1.57210200 | H | 4.15684500  | 1.93833600  | 4.69242300  |
| O  | -3.67893400 | 0.90580500  | -1.73519900 | H | 4.44898000  | 3.43187000  | 3.77515600  |
| C  | -0.92229200 | -3.15571200 | -1.13736700 | N | -1.24859900 | 2.50670500  | -1.70304200 |
| H  | -1.67745300 | -3.72571400 | -0.59711900 | H | -0.96077200 | 2.96093200  | -2.55530800 |
| H  | 0.06807200  | -3.49159300 | -0.80368400 | C | -1.73262300 | 4.80395100  | -1.05924700 |
| H  | -4.20565700 | 1.43163300  | -1.10690600 | H | -2.76516900 | 5.13375200  | -1.20100500 |
| O  | -1.11613700 | -3.43739500 | -2.51415200 | H | -1.32812600 | 5.35301700  | -0.20803800 |
| H  | -0.45950600 | -2.94399500 | -3.02176100 | H | -1.16252700 | 5.05889800  | -1.95501500 |
| C  | 2.56992400  | 1.66715700  | -0.29229400 | C | -1.74528700 | 3.32237900  | -0.72957000 |
| C  | 4.02009500  | 1.61686800  | 0.20956900  | O | -2.18158600 | 2.92114800  | 0.34695100  |
| C  | 2.41221800  | 0.89823000  | -1.60619100 | C | 3.54161000  | 1.76888200  | 2.65563600  |
| H  | 1.93690700  | 1.22581600  | 0.48336300  | O | 2.84580500  | 0.76021200  | 2.66374900  |
| C  | 4.57980300  | 0.18303200  | 0.16870900  | C | -4.65031300 | -1.35792400 | -0.07829000 |
| H  | 4.63270400  | 2.20858100  | -0.47509700 | C | -5.43317900 | -2.44719600 | 0.66585600  |
| C  | 3.00457300  | -0.51538300 | -1.51265000 | H | -5.07644900 | -1.20299100 | -1.08000000 |
| H  | 2.95492000  | 1.43060300  | -2.38971700 | C | -6.00774700 | 0.40418100  | 0.73587300  |
| H  | 4.10856900  | -0.44532300 | 0.93147700  | C | -6.84317500 | -1.93850900 | 0.99363000  |
| H  | 2.46015300  | -1.12162400 | -0.77697400 | H | -5.50436400 | -3.33647700 | 0.02528400  |
| O  | 4.37833900  | -0.38539900 | -1.11877800 | C | -6.83818800 | -0.52995700 | 1.61506300  |
| O  | 5.95601500  | 0.27998100  | 0.38417200  | H | -6.45955100 | 0.45095600  | -0.26759500 |
| O  | 1.04829300  | 0.94181900  | -2.07943600 | H | -7.42621800 | -1.88787900 | 0.06801800  |
| C  | 3.03142900  | -1.25368500 | -2.84902600 | H | -6.37522600 | -0.57968300 | 2.60973500  |
| H  | 3.39205100  | -2.27620300 | -2.67737700 | O | -4.69464500 | -0.14347800 | 0.64542300  |
| H  | 2.02425300  | -1.30339600 | -3.25885600 | O | -8.16348300 | -0.02728900 | 1.70806700  |
| O  | 3.83227300  | -0.59096200 | -3.81334500 | O | -7.54358700 | -2.84797600 | 1.83536400  |
| H  | 4.72930100  | -0.52391200 | -3.46078400 | O | -4.82497100 | -2.79109700 | 1.90590600  |
| O  | 2.23468600  | 3.04178700  | -0.46399400 | C | -5.84093000 | 1.82866800  | 1.24143700  |
| H  | 1.33730500  | 3.08750700  | -0.81950300 | H | -6.81865000 | 2.30628100  | 1.32202900  |
| O  | -3.31426500 | -1.75388800 | -0.16236500 | H | -5.37203000 | 1.82243600  | 2.23037500  |
| C  | 6.66495500  | -0.82531600 | 0.80915100  | O | -5.04547300 | 2.56847000  | 0.30798500  |
| C  | 6.19187200  | -2.13579000 | 0.74410700  | H | -4.16754900 | 2.75936300  | 0.67241300  |
| C  | 7.93993800  | -0.56101000 | 1.31376600  | H | -8.70767800 | -0.71240100 | 2.11992000  |
| C  | 6.99882900  | -3.17579500 | 1.20919400  | H | -6.92273100 | -3.16174300 | 2.50892200  |
| H  | 5.22210600  | -2.35393300 | 0.31659300  | H | -3.86933800 | -2.85113900 | 1.78089700  |
| C  | 8.73674200  | -1.60782000 | 1.76311800  |   |             |             |             |



|    |             |             |             |   |             |             |             |
|----|-------------|-------------|-------------|---|-------------|-------------|-------------|
| S2 |             |             |             | H | 8.31069200  | 0.44408000  | 1.30388400  |
| C  | -2.50744700 | 0.41443800  | -1.06381500 | C | 8.25537700  | -2.93203400 | 1.76835000  |
| C  | -1.28673400 | 1.01780400  | -1.78069000 | H | 6.59435600  | -4.19902700 | 1.25507200  |
| C  | 0.02183300  | 0.36963400  | -1.31240100 | H | 9.73343600  | -1.41031200 | 2.15272600  |
| C  | -1.07261200 | -1.68112500 | -0.77373300 | H | 8.86937200  | -3.74494200 | 2.14070400  |
| C  | -2.46840100 | -1.12430900 | -1.10322800 | H | -2.78012700 | -1.46189900 | -2.09841500 |
| H  | -1.37618000 | 0.77588900  | -2.84420800 | N | 4.21770500  | 2.26277800  | 1.45054100  |
| H  | -2.50607100 | 0.72331300  | -0.02152500 | H | 4.74239700  | 3.12118500  | 1.46435800  |
| H  | -0.88357900 | -1.51504600 | 0.29625800  | C | 3.86017400  | 2.72092700  | 3.82283800  |
| H  | 0.18388400  | 0.54089100  | -0.23888900 | H | 2.90340600  | 3.11285900  | 4.17476300  |
| O  | -0.05631000 | -1.02886700 | -1.54936000 | H | 4.26913600  | 2.09629500  | 4.61912100  |
| O  | -3.67244100 | 0.89576600  | -1.72249400 | H | 4.53919800  | 3.55734200  | 3.64454500  |
| C  | -0.94002100 | -3.17180200 | -1.06419300 | N | -1.22728900 | 2.48449100  | -1.71056100 |
| H  | -1.69998400 | -3.71676500 | -0.50617500 | H | -0.90334100 | 2.92280300  | -2.55825800 |
| H  | 0.04826200  | -3.51020500 | -0.72674100 | C | -1.67115000 | 4.79979900  | -1.10845900 |
| H  | -4.19147100 | 1.43604400  | -1.10286700 | H | -2.69210300 | 5.16143100  | -1.25531600 |
| O  | -1.13941300 | -3.48299500 | -2.43585500 | H | -1.25034700 | 5.34468800  | -0.26224200 |
| H  | -0.48137500 | -3.00389000 | -2.95498600 | H | -1.09114300 | 5.02701400  | -2.00532400 |
| C  | 2.59240300  | 1.65644200  | -0.32740200 | C | -1.73182600 | 3.32257800  | -0.76224300 |
| C  | 4.04884200  | 1.61272100  | 0.15623200  | O | -2.20898300 | 2.94896500  | 0.30752500  |
| C  | 2.41821200  | 0.85789000  | -1.62187600 | C | 3.61110200  | 1.85499600  | 2.60285700  |
| H  | 1.96704000  | 1.23509100  | 0.46560700  | O | 2.91066300  | 0.85161500  | 2.65921300  |
| C  | 4.59283700  | 0.17226400  | 0.15546200  | C | -4.62610300 | -1.36934100 | -0.01579200 |
| H  | 4.65691600  | 2.17419000  | -0.55744400 | C | -5.43684200 | -2.43603400 | 0.72705000  |
| C  | 2.99939200  | -0.55811800 | -1.49709800 | H | -5.06215400 | -1.21985700 | -1.01557900 |
| H  | 2.96119900  | 1.36642300  | -2.42103700 | C | -5.99226400 | 0.42442800  | 0.73059100  |
| H  | 4.11946100  | -0.42753700 | 0.93956600  | C | -6.86216700 | -1.90037000 | 0.93927300  |
| H  | 2.45399600  | -1.14203700 | -0.74458200 | H | -5.49099200 | -3.33417600 | 0.09581900  |
| O  | 4.37693200  | -0.43046000 | -1.11360300 | C | -6.87072000 | -0.50797700 | 1.57715000  |
| O  | 5.97172900  | 0.25931900  | 0.35969700  | H | -6.41237900 | 0.47860200  | -0.28675100 |
| O  | 1.05245900  | 0.90405100  | -2.08669500 | H | -7.36555300 | -1.82333400 | -0.03571900 |
| C  | 3.01409500  | -1.32836100 | -2.81546400 | H | -6.45843800 | -0.57601600 | 2.58985400  |
| H  | 3.36604500  | -2.34969000 | -2.62071500 | O | -4.68694300 | -0.13278600 | 0.69019100  |
| H  | 2.00500100  | -1.37856500 | -3.22006000 | O | -8.24976300 | -0.11461900 | 1.62206400  |
| O  | 3.81817300  | -0.69609200 | -3.79800700 | O | -7.54277500 | -2.84818500 | 1.75371500  |
| H  | 4.71621400  | -0.62761500 | -3.44833000 | O | -4.82064200 | -2.73726400 | 1.96312200  |
| O  | 2.25809300  | 3.02775900  | -0.52715800 | C | -5.82405400 | 1.84867700  | 1.24130000  |
| H  | 1.35593100  | 3.06527100  | -0.87127600 | H | -6.80015400 | 2.33624800  | 1.32311800  |
| O  | -3.29795600 | -1.74836000 | -0.10843800 | H | -5.35267600 | 1.83681300  | 2.22986300  |
| C  | 6.67026500  | -0.84197100 | 0.81080800  | O | -5.04040000 | 2.59765400  | 0.31339000  |
| C  | 6.18129600  | -2.14802900 | 0.78560100  | H | -4.14911800 | 2.77049800  | 0.65692000  |
| C  | 7.95163700  | -0.57918900 | 1.29996100  | H | -8.38297300 | 0.54883400  | 2.30756000  |
| C  | 6.97888600  | -3.18426200 | 1.27451600  | H | -8.40400200 | -2.47538600 | 1.98359000  |
| H  | 5.20586600  | -2.36644600 | 0.37138200  | H | -5.44932300 | -3.27064400 | 2.46868200  |
| C  | 8.73889100  | -1.62256400 | 1.77352600  |   |             |             |             |

|    |             |             |             |   |             |             |             |
|----|-------------|-------------|-------------|---|-------------|-------------|-------------|
| T1 |             |             |             | H | -7.24517000 | -1.61056400 | 2.92862900  |
| C  | 2.26580400  | 1.24572200  | -0.84567100 | C | -8.81618000 | -3.25253300 | 0.38942600  |
| C  | 0.75817100  | 1.54385700  | -0.90571800 | H | -8.09779300 | -3.32627400 | -1.63673100 |
| C  | 0.03079000  | 0.73822600  | -1.99963300 | H | -9.25249900 | -3.00725600 | 2.48631900  |
| C  | 1.77051400  | -0.93738900 | -2.03058000 | H | -9.68998400 | -3.86335500 | 0.19089800  |
| C  | 2.51716000  | -0.26401900 | -0.87464000 | H | 2.20396900  | -0.71879400 | 0.06927000  |
| H  | 0.34870300  | 1.25245100  | 0.06249300  | N | -4.87319100 | 1.75433200  | 1.42742900  |
| H  | 2.76052300  | 1.68812100  | -1.71644800 | H | -5.69501100 | 1.28506100  | 1.78100600  |
| H  | 2.17236900  | -0.56527600 | -2.98570700 | C | -6.01645400 | 3.69044700  | 2.35043700  |
| H  | 0.26667400  | 1.14479200  | -2.98620000 | H | -5.74966500 | 4.04593000  | 3.34833300  |
| O  | 0.37850300  | -0.63571400 | -1.93672800 | H | -6.31910600 | 4.56165400  | 1.76729700  |
| O  | 2.74347000  | 1.84083600  | 0.35118700  | H | -6.86286100 | 3.00645600  | 2.43287800  |
| C  | 1.86965000  | -2.46209200 | -2.01132200 | N | 0.46845100  | 2.96353300  | -1.03827400 |
| H  | 2.91454200  | -2.75735300 | -2.12291500 | H | -0.24116200 | 3.30155400  | -0.40630800 |
| H  | 1.31958600  | -2.85525200 | -2.87632300 | C | 0.41029200  | 5.19279600  | -2.01478600 |
| H  | 3.63393200  | 1.50403400  | 0.53667100  | H | 1.28556100  | 5.83586600  | -1.89578800 |
| O  | 1.40200900  | -3.03019900 | -0.80439100 | H | -0.05751400 | 5.45196500  | -2.96638300 |
| H  | 0.43459700  | -2.93333900 | -0.76024400 | H | -0.28803500 | 5.40155400  | -1.20190000 |
| C  | -2.83456200 | 1.37774800  | -0.07813800 | C | 0.87503800  | 3.74824400  | -2.07149800 |
| C  | -3.86670200 | 0.80239300  | 0.92185100  | O | 1.58450500  | 3.34202300  | -2.98733200 |
| C  | -2.04032700 | 0.25577300  | -0.77843800 | C | -4.78519400 | 3.08147900  | 1.70894200  |
| H  | -3.36778000 | 1.94235600  | -0.85696800 | O | -3.80491300 | 3.78658200  | 1.47250900  |
| C  | -4.66647200 | -0.33349800 | 0.26468100  | C | 4.65910100  | -1.02707800 | -0.01066500 |
| H  | -3.31563700 | 0.37311100  | 1.76645000  | C | 5.97163200  | -1.57229400 | -0.59383400 |
| C  | -2.95961900 | -0.86689800 | -1.28933900 | H | 4.10606500  | -1.83600300 | 0.49093900  |
| H  | -1.32645600 | -0.17218800 | -0.07226600 | C | 5.68806600  | -0.37736300 | 2.05232600  |
| H  | -5.28392200 | 0.06474300  | -0.55643700 | C | 6.95931600  | -1.91383600 | 0.52218400  |
| H  | -3.57805400 | -0.46705500 | -2.10744700 | H | 5.73773300  | -2.47765200 | -1.16978500 |
| O  | -3.80784900 | -1.32991500 | -0.22557900 | C | 7.07203200  | -0.76107900 | 1.52105200  |
| O  | -5.48974600 | -0.88760600 | 1.25425200  | H | 5.22533300  | -1.24296800 | 2.54801400  |
| O  | -1.37454900 | 0.82010200  | -1.91359900 | H | 6.61117500  | -2.80245600 | 1.05831600  |
| C  | -2.24500400 | -2.11094300 | -1.80177000 | H | 7.49638900  | 0.11399300  | 1.01264000  |
| H  | -2.99196800 | -2.79533800 | -2.22050600 | O | 4.88808500  | 0.02285500  | 0.92942800  |
| H  | -1.53725800 | -1.83661100 | -2.57841400 | O | 7.89936300  | -1.13189600 | 2.62289900  |
| O  | -1.49529700 | -2.77133000 | -0.78465700 | O | 8.24180700  | -2.25289600 | 0.00564100  |
| H  | -2.09505700 | -3.04731300 | -0.08040300 | O | 6.61845000  | -0.61912500 | -1.42688000 |
| O  | -1.89438100 | 2.20740100  | 0.57510700  | C | 5.72101900  | 0.78288900  | 3.04972500  |
| H  | -2.40449900 | 2.94757300  | 0.97067600  | H | 6.29940600  | 1.61605000  | 2.62587600  |
| O  | 3.93019100  | -0.50754100 | -1.07454900 | H | 4.70213600  | 1.13446600  | 3.22103800  |
| C  | -6.56697800 | -1.68304700 | 0.89622500  | O | 6.23123800  | 0.38324200  | 4.30859000  |
| C  | -6.79155200 | -2.16900300 | -0.39075800 | H | 7.08722600  | -0.04657800 | 4.16643300  |
| C  | -7.45058800 | -1.98811700 | 1.93283100  | H | 8.71068200  | -1.52165600 | 2.26948500  |
| C  | -7.92463100 | -2.94790800 | -0.63453600 | H | 8.43073100  | -1.64966000 | -0.72814500 |
| H  | -6.08803800 | -1.97649600 | -1.18965000 | H | 5.95893100  | -0.20420100 | -1.99856000 |
| C  | -8.56977000 | -2.77209300 | 1.67641400  |   |             |             |             |

Table S3. Cartesian coordinates of optimized configurations for Man $\beta$ (1,3) Man $\beta$ (1,6)Man

|    |             |             |             |   |             |             |             |
|----|-------------|-------------|-------------|---|-------------|-------------|-------------|
| Al |             |             |             | O | 4.46589500  | -2.49500100 | -0.31237000 |
|    |             |             |             | H | 4.41058400  | -1.64900600 | 0.17233200  |
|    |             |             |             | H | -0.64036600 | -3.54160400 | -0.39027200 |
| C  | 2.60356000  | -3.57830300 | 0.78615300  | C | 2.57528600  | -1.35520700 | -2.40296500 |
| C  | 1.17315800  | -4.10005500 | 0.63405000  | H | 3.65635400  | -1.22322900 | -2.44534300 |
| C  | 0.29184000  | -3.06369100 | -0.07677600 | C | -1.37207500 | 2.36013200  | 1.83778700  |
| C  | 2.17636500  | -1.97851200 | -1.07540000 | O | 1.99842300  | -0.05321400 | -2.57734600 |
| C  | 3.16025600  | -3.01901700 | -0.52721600 | H | 1.06736600  | -0.06819900 | -2.28806200 |
| H  | 2.60383900  | -2.76951500 | 1.53088800  | H | 2.27370800  | -2.01358900 | -3.22423000 |
| H  | 2.08760000  | -1.17282300 | -0.33989700 | H | 3.19651900  | 0.55804400  | 2.28853300  |
| H  | 3.27790300  | -3.83433100 | -1.24573000 | H | 4.28169100  | 1.88291700  | 1.84951000  |
| O  | 0.88228400  | -2.58292500 | -1.26259800 | O | 4.29435900  | 0.20750700  | 0.61011600  |
| C  | -1.16469900 | -1.25938900 | 0.68220300  | H | 4.50634700  | 0.66717700  | -0.22072400 |
| C  | -1.44695600 | -0.68637800 | -0.71460300 | H | -0.90152200 | 2.29257300  | 2.82306900  |
| C  | -1.03542100 | -0.12271700 | 1.69155000  | H | -2.10511700 | 3.17298200  | 1.84021200  |
| C  | -2.77331500 | 0.08149000  | -0.62695500 | O | -0.38962100 | 2.61841300  | 0.82216000  |
| H  | -1.52153800 | -1.47624500 | -1.46025400 | H | 0.74896300  | -4.29173200 | 1.62816400  |
| C  | -2.04947900 | 1.03359300  | 1.52010100  | H | -0.02580700 | 0.27929200  | 1.56838000  |
| H  | -3.04267400 | 0.49233800  | -1.60295500 | H | -2.00975500 | -1.89952400 | 0.95338400  |
| H  | -2.86671600 | 0.86020900  | 2.22680500  | O | -3.76924900 | -0.81086700 | -0.17925800 |
| O  | -2.60177100 | 1.20808400  | 0.19831200  | C | -5.10173600 | -0.49127600 | -0.37392100 |
| C  | 3.59466700  | 1.12866400  | 1.44831700  | C | -5.56276200 | 0.79569000  | -0.65276300 |
| C  | 2.44965000  | 1.82491800  | 0.70669800  | C | -5.99805200 | -1.55535700 | -0.25783800 |
| C  | 2.95018800  | 2.68579900  | -0.46578200 | C | -6.93216900 | 1.00118400  | -0.83466200 |
| C  | 0.71367300  | 3.42326700  | 1.20856100  | H | -4.87717000 | 1.63157300  | -0.70309500 |
| C  | 1.80506000  | 3.49403300  | -1.06963700 | C | -7.35921600 | -1.33227800 | -0.43150000 |
| H  | 3.70420800  | 3.38269600  | -0.09000700 | H | -5.61332800 | -2.54500200 | -0.03778100 |
| C  | 1.08867400  | 4.30647100  | 0.01117600  | C | -7.83409600 | -0.05286000 | -0.72537100 |
| H  | 0.44464300  | 4.06526700  | 2.04999800  | H | -7.28985400 | 2.00232800  | -1.05286300 |
| H  | 1.08455300  | 2.81152100  | -1.54191900 | H | -8.05113000 | -2.16344200 | -0.34194900 |
| O  | 1.78673100  | 2.64057400  | 1.68353200  | H | -8.89612500 | 0.11880300  | -0.86325100 |
| O  | 3.61124600  | 1.90915400  | -1.46846000 | H | 0.16380700  | 4.72615800  | -0.40303200 |
| H  | 2.98348400  | 1.27279100  | -1.88665300 | O | 0.04827700  | -2.00904200 | 0.83515300  |
| O  | 2.28435800  | 4.42339600  | -2.03715800 | H | 1.75724900  | 1.06452100  | 0.32666000  |
| H  | 2.94353300  | 3.97492000  | -2.58450500 |   |             |             |             |
| O  | 1.92383700  | 5.34134000  | 0.50255100  |   |             |             |             |
| H  | 2.32524600  | 5.77132300  | -0.26581300 |   |             |             |             |
| O  | -1.19745900 | -0.57342800 | 3.03324300  |   |             |             |             |
| H  | -0.48145300 | -1.18967600 | 3.23226500  |   |             |             |             |
| O  | -0.44398600 | 0.21593800  | -1.18250500 |   |             |             |             |
| H  | -0.54286300 | 1.07302500  | -0.73288500 |   |             |             |             |
| O  | 1.14014200  | -5.28099600 | -0.14892500 |   |             |             |             |
| H  | 1.87328600  | -5.83820500 | 0.14864800  |   |             |             |             |
| O  | 3.39598300  | -4.66426800 | 1.25862300  |   |             |             |             |
| H  | 4.32454100  | -4.42286400 | 1.13454200  |   |             |             |             |

|    |             |             |             |   |             |             |             |
|----|-------------|-------------|-------------|---|-------------|-------------|-------------|
| A2 |             |             |             | H | 0.74690100  | 3.54347600  | -0.59748200 |
| C  | -2.41630900 | 3.79123600  | 0.78856900  | C | -2.68126800 | 1.32526400  | -2.22613800 |
| C  | -1.01808200 | 4.29288600  | 0.41295000  | H | -3.74665300 | 1.12549600  | -2.10955000 |
| C  | -0.19231300 | 3.15264100  | -0.19389800 | C | 1.20298000  | -2.17688800 | 2.03180500  |
| C  | -2.14977500 | 2.00118900  | -0.97081000 | O | -2.05595600 | 0.06989200  | -2.47612800 |
| C  | -3.08904400 | 3.05368600  | -0.37735800 | H | -1.11965600 | 0.09924700  | -2.21157000 |
| H  | -2.33279800 | 3.09068000  | 1.62333800  | H | -2.54423000 | 1.99690300  | -3.08321700 |
| H  | -1.96380100 | 1.23669900  | -0.21257300 | H | -3.71685000 | -0.83568600 | 2.04500600  |
| H  | -3.36893300 | 3.77798800  | -1.15607800 | H | -4.65020300 | -2.17170700 | 1.37002200  |
| O  | -0.89014500 | 2.62555900  | -1.31534400 | O | -4.69984000 | -0.48902300 | 0.23573000  |
| C  | 1.20904200  | 1.36319600  | 0.69311100  | H | -4.45897000 | 0.44024600  | 0.36190700  |
| C  | 1.44263900  | 0.67990100  | -0.66075300 | H | 0.74307700  | -2.06008800 | 3.01905000  |
| C  | 1.03032100  | 0.31331800  | 1.78479900  | H | 1.87900300  | -3.03837300 | 2.04940000  |
| C  | 2.73621300  | -0.13741500 | -0.53144100 | O | 0.20320800  | -2.36438400 | 1.02593500  |
| H  | 1.55523200  | 1.41217600  | -1.45988600 | H | -0.51758500 | 4.69374400  | 1.29593000  |
| C  | 1.97460700  | -0.91078300 | 1.68187700  | H | -0.00171700 | -0.04011800 | 1.70347000  |
| H  | 2.96796000  | -0.63370900 | -1.47669100 | H | 2.08224300  | 1.98320800  | 0.91412500  |
| H  | 2.78494400  | -0.75838400 | 2.40053900  | O | 3.77499100  | 0.75614200  | -0.18310200 |
| O  | 2.54913000  | -1.18091800 | 0.38549600  | C | 5.08950500  | 0.37807100  | -0.39298900 |
| C  | -3.98706000 | -1.34206700 | 1.11014800  | C | 5.50168200  | -0.94259300 | -0.57391000 |
| C  | -2.69857500 | -1.91628800 | 0.50007100  | C | 6.02130100  | 1.41780500  | -0.40067500 |
| C  | -2.92490800 | -2.90999800 | -0.65281800 | C | 6.85665800  | -1.20789900 | -0.78361000 |
| C  | -0.85960300 | -3.27109800 | 1.34370100  | H | 4.79032000  | -1.75701400 | -0.52853500 |
| C  | -1.61497100 | -3.61695900 | -1.01719500 | C | 7.36799200  | 1.13609300  | -0.60047200 |
| H  | -3.64251000 | -3.66450600 | -0.31829700 | H | 5.67533500  | 2.43513200  | -0.25450100 |
| C  | -0.97163700 | -4.27944300 | 0.19519700  | C | 7.79330500  | -0.17874000 | -0.79761400 |
| H  | -0.62833900 | -3.80403300 | 2.26854000  | H | 7.17579500  | -2.23536700 | -0.92579800 |
| H  | -0.91561200 | -2.87815800 | -1.43381000 | H | 8.08725800  | 1.94866200  | -0.60742600 |
| O  | -2.04695800 | -2.57961400 | 1.60781000  | H | 8.84386200  | -0.39659900 | -0.95636700 |
| O  | -3.47880700 | -2.34356700 | -1.82904100 | H | 0.04106400  | -4.61726500 | -0.06125000 |
| H  | -3.02082200 | -1.51090000 | -2.05507700 | O | 0.02933200  | 2.18561600  | 0.79428500  |
| O  | -1.85645600 | -4.63578000 | -1.98260500 | H | -2.06537300 | -1.09073000 | 0.15156000  |
| H  | -2.49657900 | -4.27459600 | -2.61378400 |   |             |             |             |
| O  | -1.74874500 | -5.37140100 | 0.65809900  |   |             |             |             |
| H  | -2.04259400 | -5.85801100 | -0.12538600 |   |             |             |             |
| O  | 1.24298400  | 0.85011000  | 3.08758500  |   |             |             |             |
| H  | 0.52332500  | 1.46077200  | 3.28838100  |   |             |             |             |
| O  | 0.38650100  | -0.18592400 | -1.05976200 |   |             |             |             |
| H  | 0.38479500  | -0.99416000 | -0.51438300 |   |             |             |             |
| O  | -1.11058500 | 5.38174400  | -0.50809300 |   |             |             |             |
| H  | -1.22890700 | 5.02776600  | -1.40101300 |   |             |             |             |
| O  | -3.24810100 | 4.84979900  | 1.24703900  |   |             |             |             |
| H  | -3.06466600 | 5.62685300  | 0.69819100  |   |             |             |             |
| O  | -4.26139600 | 2.38319100  | 0.08302000  |   |             |             |             |
| H  | -4.80376400 | 3.01811400  | 0.57054400  |   |             |             |             |

|    |             |             |             |   |             |             |             |
|----|-------------|-------------|-------------|---|-------------|-------------|-------------|
| A3 |             |             |             | H | 0.26592100  | -3.72337500 | 0.22369500  |
| C  | -2.98489400 | -3.34976200 | -0.87763300 | C | -2.69488800 | -1.43078900 | 2.49112400  |
| C  | -1.62248900 | -4.03894900 | -0.77964500 | H | -3.74586800 | -1.13360400 | 2.53879800  |
| C  | -0.62579300 | -3.14390800 | -0.03052900 | C | 1.58452300  | 2.19169700  | -1.93815200 |
| C  | -2.36766900 | -1.95290200 | 1.09977900  | O | -1.84168700 | -0.34094700 | 2.85676200  |
| C  | -3.46496300 | -2.82504900 | 0.47855700  | H | -2.18148000 | 0.48232900  | 2.47017600  |
| H  | -2.89502600 | -2.49554400 | -1.56352500 | H | -2.52581900 | -2.21767300 | 3.22817200  |
| H  | -2.20374400 | -1.09292000 | 0.44237800  | H | -3.09927700 | 0.91176900  | -2.07216500 |
| H  | -3.68625100 | -3.67144100 | 1.13374800  | H | -4.05625300 | 2.29750800  | -1.53431800 |
| O  | -1.14137700 | -2.69587400 | 1.20534000  | O | -4.03393000 | 0.62613500  | -0.29144400 |
| C  | 0.95192400  | -1.40171800 | -0.72149200 | H | -4.14578600 | 1.07978400  | 0.55729400  |
| C  | 1.30145600  | -0.93077600 | 0.69909200  | H | 1.09016900  | 2.13741100  | -2.91238600 |
| C  | 0.85236600  | -0.19281800 | -1.64199400 | H | 2.45104000  | 2.85723400  | -2.00662200 |
| C  | 2.65020400  | -0.19738800 | 0.61139300  | O | 0.69405400  | 2.70064900  | -0.93477000 |
| H  | 1.42148100  | -1.78396300 | 1.37155700  | H | -1.23360000 | -4.21811400 | -1.79032500 |
| C  | 2.02860000  | 0.79135600  | -1.52819600 | H | -0.06774900 | 0.32563000  | -1.36906100 |
| H  | 2.92334300  | 0.19076200  | 1.59456200  | H | 1.74083600  | -2.07703000 | -1.06872900 |
| H  | 2.80658800  | 0.45376600  | -2.22391300 | O | 3.61346800  | -1.15199700 | 0.17913400  |
| O  | 2.58623300  | 0.92875400  | -0.21663200 | C | 4.95400500  | -0.89324600 | 0.36874800  |
| C  | -3.37242200 | 1.50693400  | -1.20034200 | C | 5.47460700  | 0.36315300  | 0.68640600  |
| C  | -2.11427900 | 2.13718800  | -0.59795500 | C | 5.80789900  | -1.98849900 | 0.21136600  |
| C  | -2.40898900 | 3.04838600  | 0.59736200  | C | 6.85252100  | 0.50441200  | 0.86395300  |
| C  | -0.30501100 | 3.58191100  | -1.32218000 | H | 4.82613400  | 1.22519600  | 0.76969200  |
| C  | -1.15983500 | 3.81327200  | 1.03304300  | C | 7.17824700  | -1.82924200 | 0.38176700  |
| H  | -3.18990300 | 3.76736400  | 0.31139600  | H | 5.38048700  | -2.95368200 | -0.03738000 |
| C  | -0.54656600 | 4.55503200  | -0.16071600 | C | 7.70971700  | -0.58155600 | 0.71335500  |
| H  | -0.04504900 | 4.13216500  | -2.23213900 | H | 7.25311300  | 1.48221600  | 1.11246200  |
| H  | -0.43140800 | 3.10544600  | 1.43471300  | H | 7.83349700  | -2.68588600 | 0.25987500  |
| O  | -1.53556000 | 2.92477800  | -1.65652000 | H | 8.77900400  | -0.45923900 | 0.84873000  |
| O  | -2.91700700 | 2.25320700  | 1.68767900  | H | 0.39820200  | 5.01180600  | 0.13620000  |
| H  | -2.97230900 | 2.83808600  | 2.45833400  | O | -0.31738900 | -2.06107000 | -0.88171500 |
| O  | -1.49638400 | 4.70376200  | 2.09336900  | H | -1.41471900 | 1.35971400  | -0.27904100 |
| H  | -1.81722700 | 5.52625600  | 1.69375500  |   |             |             |             |
| O  | -1.39506900 | 5.63577100  | -0.56098200 |   |             |             |             |
| H  | -2.06731800 | 5.30156800  | -1.17063800 |   |             |             |             |
| O  | 0.79850200  | -0.57044000 | -3.01740200 |   |             |             |             |
| H  | 0.04549800  | -1.16414800 | -3.12909700 |   |             |             |             |
| O  | 0.36616900  | -0.00174500 | 1.20884200  |   |             |             |             |
| H  | -0.23037500 | -0.40870700 | 1.86293400  |   |             |             |             |
| O  | -1.71516000 | -5.25993700 | -0.06570900 |   |             |             |             |
| H  | -2.49604000 | -5.72417800 | -0.39844100 |   |             |             |             |
| O  | -3.90002100 | -4.30211200 | -1.41425000 |   |             |             |             |
| H  | -4.79403300 | -3.96424100 | -1.26594300 |   |             |             |             |
| O  | -4.69733100 | -2.12427200 | 0.31597900  |   |             |             |             |
| H  | -4.52577200 | -1.25000800 | -0.07887500 |   |             |             |             |

|    |             |             |             |   |             |             |             |
|----|-------------|-------------|-------------|---|-------------|-------------|-------------|
| A4 |             |             |             | H | -0.12300100 | -3.69499800 | -0.34666400 |
| C  | 3.08270100  | -3.38054900 | 0.92468900  | C | 2.91488500  | -1.21062200 | -2.32546400 |
| C  | 1.75342900  | -4.09592400 | 0.66246400  | H | 3.92303500  | -0.79888300 | -2.25533600 |
| C  | 0.76701400  | -3.14505900 | -0.02567500 | C | -1.63663300 | 2.07101300  | 2.03058000  |
| C  | 2.52790800  | -1.83753800 | -0.99231900 | O | 1.98413200  | -0.20435600 | -2.70580000 |
| C  | 3.61883900  | -2.68637600 | -0.33533700 | H | 2.27258900  | 0.66712300  | -2.37303200 |
| H  | 2.93053000  | -2.61475600 | 1.68946600  | H | 2.90254800  | -1.97575200 | -3.10721900 |
| H  | 2.25322000  | -1.03453600 | -0.30875100 | H | 3.08540900  | 1.02030100  | 1.73711600  |
| H  | 3.97631000  | -3.44442200 | -1.04701800 | H | 3.95949100  | 2.45647900  | 1.18624900  |
| O  | 1.36326600  | -2.66522200 | -1.22593400 | O | 3.87843700  | 0.90400600  | -0.19093200 |
| C  | -0.83748700 | -1.45971200 | 0.71405800  | H | 4.33741500  | 0.11917300  | 0.14422500  |
| C  | -1.19373800 | -0.96969800 | -0.69850000 | H | -1.11601000 | 2.01084900  | 2.99095200  |
| C  | -0.76512000 | -0.26429000 | 1.65469300  | H | -2.54979500 | 2.66270100  | 2.15360200  |
| C  | -2.57452300 | -0.29799300 | -0.59428400 | O | -0.82046700 | 2.69262300  | 1.03399100  |
| H  | -1.27858300 | -1.80896300 | -1.39502600 | H | 1.33622500  | -4.46220600 | 1.60200200  |
| C  | -1.99348900 | 0.65868900  | 1.57260300  | H | 0.12609500  | 0.30321100  | 1.38208600  |
| H  | -2.86180200 | 0.10555900  | -1.56708100 | H | -1.60899400 | -2.15853900 | 1.05145100  |
| H  | -2.74904600 | 0.25223600  | 2.25660100  | O | -3.49508800 | -1.30975700 | -0.19570100 |
| O  | -2.56163600 | 0.80305900  | 0.26600500  | C | -4.84566700 | -1.10579500 | -0.38216800 |
| C  | 3.28961900  | 1.64823200  | 0.86182400  | C | -5.42222000 | 0.13697200  | -0.65330200 |
| C  | 1.96243200  | 2.25292600  | 0.40015200  | C | -5.64906400 | -2.24407300 | -0.27110600 |
| C  | 2.08208900  | 3.25037500  | -0.76170200 | C | -6.80465700 | 0.22181400  | -0.83122100 |
| C  | 0.19158600  | 3.56379000  | 1.43476800  | H | -4.81394900 | 1.03051700  | -0.70002000 |
| C  | 0.78091400  | 4.04381100  | -0.94445600 | C | -7.02492800 | -2.14113000 | -0.44109500 |
| H  | 2.90516600  | 3.94907400  | -0.54810100 | H | -5.17908800 | -3.19780600 | -0.05708800 |
| C  | 0.30783300  | 4.66109300  | 0.37210500  | C | -7.61185200 | -0.90708300 | -0.72648500 |
| H  | -0.00598300 | 3.99927400  | 2.41950400  | H | -7.24877300 | 1.18928600  | -1.04333600 |
| H  | 0.01270300  | 3.36279400  | -1.31605700 | H | -7.64070800 | -3.03077800 | -0.35481100 |
| O  | 1.45726600  | 2.92382200  | 1.58036300  | H | -8.68526700 | -0.82831800 | -0.86141200 |
| O  | 2.37734100  | 2.55209300  | -1.97273800 | H | -0.65932400 | 5.14499500  | 0.22860600  |
| H  | 2.19818200  | 3.16231800  | -2.70219100 | O | 0.44710100  | -2.10933800 | 0.85753500  |
| O  | 0.96018400  | 5.03253000  | -1.95669300 | H | 1.27012300  | 1.46353300  | 0.09817500  |
| H  | 1.38449200  | 5.79908100  | -1.54374400 |   |             |             |             |
| O  | 1.20157700  | 5.69397500  | 0.79849000  |   |             |             |             |
| H  | 1.94987000  | 5.28642300  | 1.25663200  |   |             |             |             |
| O  | -0.68327000 | -0.66536000 | 3.02238000  |   |             |             |             |
| H  | 0.13357200  | -1.16546100 | 3.13830800  |   |             |             |             |
| O  | -0.30339600 | 0.01355300  | -1.17419300 |   |             |             |             |
| H  | 0.35928100  | -0.33652000 | -1.80104900 |   |             |             |             |
| O  | 1.96886900  | -5.25533800 | -0.14626300 |   |             |             |             |
| H  | 2.00077200  | -4.98334100 | -1.07468700 |   |             |             |             |
| O  | 4.06231200  | -4.27003900 | 1.45003000  |   |             |             |             |
| H  | 3.95974200  | -5.11859900 | 0.99358200  |   |             |             |             |
| O  | 4.71184900  | -1.83070300 | 0.01763100  |   |             |             |             |
| H  | 5.33649300  | -2.35267300 | 0.53976700  |   |             |             |             |

|    |             |             |             |   |             |             |             |
|----|-------------|-------------|-------------|---|-------------|-------------|-------------|
| B1 |             |             |             | H | -0.59659600 | -3.59509600 | -0.67153000 |
| C  | 2.56735300  | -3.66049800 | 0.70678900  | C | 2.68407500  | -1.22066200 | -2.32210000 |
| C  | 1.18478300  | -4.22631200 | 0.37935800  | H | 3.74570700  | -0.98634400 | -2.23834500 |
| C  | 0.31349000  | -3.14224800 | -0.26854600 | C | -1.21461200 | 2.13890800  | 2.00421100  |
| C  | 2.20430300  | -1.90236700 | -1.05062400 | O | 2.00630300  | 0.01715300  | -2.56425700 |
| C  | 3.19770100  | -2.92303200 | -0.47916000 | H | 1.07306700  | -0.06064300 | -2.29709600 |
| H  | 2.46118700  | -2.94646400 | 1.53512100  | H | 2.54346000  | -1.89824700 | -3.17154600 |
| H  | 2.02551900  | -1.13714800 | -0.28915000 | H | 4.53682000  | 1.96723600  | 1.35126100  |
| H  | 3.46887100  | -3.64874200 | -1.25022100 | H | 4.50894200  | 0.97172300  | -0.11488500 |
| O  | 0.95234100  | -2.54021300 | -1.36818000 | O | 3.74823600  | 0.04565200  | 1.51714400  |
| C  | -1.16786900 | -1.40186500 | 0.63468500  | H | 3.32839800  | 0.25768600  | 2.35942700  |
| C  | -1.43992700 | -0.72330100 | -0.71595400 | H | -0.75234400 | 2.01577200  | 2.98921600  |
| C  | -0.99281400 | -0.34236800 | 1.71868200  | H | -1.90605100 | 2.98737000  | 2.03339500  |
| C  | -2.74337300 | 0.07503400  | -0.56024600 | O | -0.21556400 | 2.36592700  | 1.00122800  |
| H  | -1.54861700 | -1.45683900 | -1.51385100 | H | 0.69882400  | -4.55368000 | 1.30774800  |
| C  | -1.96045400 | 0.86158400  | 1.63749500  | H | 0.03049200  | 0.02845200  | 1.60879100  |
| H  | -3.00563000 | 0.56284800  | -1.50192700 | H | -2.03147000 | -2.03289200 | 0.86561800  |
| H  | -2.76631800 | 0.68659100  | 2.35652300  | O | -3.76276200 | -0.82098400 | -0.17343000 |
| O  | -2.53902800 | 1.13264800  | 0.34364200  | C | -5.08602200 | -0.46024600 | -0.35595800 |
| C  | 3.94190100  | 1.25434200  | 0.77069100  | C | -5.51842600 | 0.85417200  | -0.53500000 |
| C  | 2.63541400  | 1.90453400  | 0.34754800  | C | -6.00462200 | -1.51145100 | -0.33551200 |
| C  | 2.85933200  | 2.95629000  | -0.74958300 | C | -6.88116200 | 1.10180900  | -0.71418100 |
| C  | 0.86764900  | 3.22293200  | 1.34962500  | H | -4.81549100 | 1.67688000  | -0.51201900 |
| C  | 1.56069300  | 3.71615600  | -1.02088200 | C | -7.35893800 | -1.24725800 | -0.50502600 |
| H  | 3.61287200  | 3.67321300  | -0.41160400 | H | -5.64217000 | -2.52341800 | -0.19255000 |
| C  | 0.98348200  | 4.30337400  | 0.26654400  | C | -7.80499600 | 0.06113800  | -0.69970100 |
| H  | 0.67957700  | 3.70042900  | 2.31342800  | H | -7.21639900 | 2.12433500  | -0.85526100 |
| H  | 0.82639900  | 3.02687100  | -1.46082600 | H | -8.06803600 | -2.06861200 | -0.49070800 |
| O  | 2.05598700  | 2.49100900  | 1.53172900  | H | -8.86163700 | 0.26505400  | -0.83502200 |
| O  | 3.36822500  | 2.39372800  | -1.94944200 | H | -0.02361500 | 4.69276800  | 0.06953000  |
| H  | 2.84331500  | 1.60780800  | -2.21583900 | O | 0.02262600  | -2.19458200 | 0.74121400  |
| O  | 1.78724800  | 4.80342200  | -1.91238700 | H | 1.96353200  | 1.12741900  | -0.03046200 |
| H  | 2.36648500  | 4.48444100  | -2.61890000 |   |             |             |             |
| O  | 1.81650400  | 5.33027800  | 0.77843300  |   |             |             |             |
| H  | 2.06295300  | 5.89348000  | 0.03101500  |   |             |             |             |
| O  | -1.15726400 | -0.87984200 | 3.02854200  |   |             |             |             |
| H  | -0.49150000 | -1.56794300 | 3.15397700  |   |             |             |             |
| O  | -0.41592400 | 0.17549900  | -1.13417400 |   |             |             |             |
| H  | -0.44834900 | 0.98692100  | -0.59777200 |   |             |             |             |
| O  | 1.27024400  | -5.30371100 | -0.53619000 |   |             |             |             |
| H  | 2.00011400  | -5.86763700 | -0.24375700 |   |             |             |             |
| O  | 3.37989600  | -4.75723600 | 1.11990000  |   |             |             |             |
| H  | 4.30074800  | -4.46191200 | 1.11210500  |   |             |             |             |
| O  | 4.42087300  | -2.31605900 | -0.06922700 |   |             |             |             |
| H  | 4.23164500  | -1.60518300 | 0.57085400  |   |             |             |             |

|    |             |             |             |   |             |             |             |
|----|-------------|-------------|-------------|---|-------------|-------------|-------------|
| B2 |             |             |             | H | 0.06438600  | -3.76625100 | 0.52744500  |
| C  | -3.08030600 | -3.31414700 | -0.82018400 | C | -2.87971700 | -1.14486300 | 2.40973800  |
| C  | -1.80223000 | -4.09761400 | -0.52157300 | H | -3.85991000 | -0.66838800 | 2.32188300  |
| C  | -0.78752100 | -3.18050700 | 0.17178500  | C | 1.52165600  | 1.98992900  | -2.04639200 |
| C  | -2.48442100 | -1.75240200 | 1.07074900  | O | -1.89495300 | -0.21777300 | 2.87069700  |
| C  | -3.60754500 | -2.56043000 | 0.40452700  | H | -2.12248000 | 0.68719600  | 2.59893700  |
| H  | -2.85731400 | -2.57871700 | -1.60438400 | H | -2.94727400 | -1.93655600 | 3.15955900  |
| H  | -2.19538400 | -0.94780000 | 0.38738700  | H | -4.07694700 | 2.45386600  | -0.98664800 |
| H  | -4.02207100 | -3.27966100 | 1.11568800  | H | -3.90563300 | 1.34524700  | 0.38155600  |
| O  | -1.33309900 | -2.57718300 | 1.32287400  | O | -3.42580400 | 0.52232500  | -1.40076500 |
| C  | 0.86044000  | -1.53973000 | -0.65761700 | H | -3.03972000 | 0.76385600  | -2.25187800 |
| C  | 1.25061100  | -1.02684200 | 0.73844500  | H | 0.99401100  | 1.90225900  | -3.00087400 |
| C  | 0.72354700  | -0.34783900 | -1.59506400 | H | 2.40726300  | 2.61994300  | -2.17831300 |
| C  | 2.60613200  | -0.31406800 | 0.58205400  | O | 0.68434600  | 2.57653700  | -1.04296800 |
| H  | 1.38335400  | -1.85744500 | 1.43711000  | H | -1.36533000 | -4.44963000 | -1.46512800 |
| C  | 1.93340600  | 0.59784000  | -1.57769500 | H | -0.16126600 | 0.20157700  | -1.26892100 |
| H  | 2.90909000  | 0.11037600  | 1.54103500  | H | 1.64746300  | -2.21476100 | -1.00962900 |
| H  | 2.67746600  | 0.19879800  | -2.27826200 | O | 3.54759900  | -1.29618800 | 0.16482500  |
| O  | 2.53324900  | 0.77941000  | -0.28968900 | C | 4.89494700  | -1.04734700 | 0.31710200  |
| C  | -3.44508700 | 1.67032500  | -0.55083000 | C | 5.43730100  | 0.21514400  | 0.56711400  |
| C  | -2.06166100 | 2.23313000  | -0.26638000 | C | 5.73176900  | -2.15991000 | 0.19343000  |
| C  | -2.10414400 | 3.26241400  | 0.86679800  | C | 6.82007800  | 0.34585700  | 0.71152600  |
| C  | -0.31505100 | 3.46484600  | -1.41948600 | H | 4.80134500  | 1.08860600  | 0.62412000  |
| C  | -0.77539800 | 4.01166200  | 0.98559300  | C | 7.10713700  | -2.01140900 | 0.33001900  |
| H  | -2.90622800 | 3.98924000  | 0.66858200  | H | 5.28748300  | -3.12964100 | -0.00252200 |
| C  | -0.35547300 | 4.58507400  | -0.37275200 | C | 7.66051400  | -0.75718200 | 0.59403000  |
| H  | -0.15421700 | 3.87545500  | -2.42104200 | H | 7.23768600  | 1.32840100  | 0.90786300  |
| H  | -0.00987800 | 3.31555600  | 1.33445200  | H | 7.74914900  | -2.88136600 | 0.23494600  |
| O  | -1.60883700 | 2.84959300  | -1.49427000 | H | 8.73370700  | -0.64309000 | 0.70313000  |
| O  | -2.41080600 | 2.57108200  | 2.08238600  | H | 0.63190900  | 5.04116300  | -0.28803300 |
| H  | -2.23892400 | 3.17987900  | 2.81484700  | O | -0.40357400 | -2.21622000 | -0.78445800 |
| O  | -0.88253400 | 5.02727100  | 1.97845600  | H | -1.37076200 | 1.43353400  | 0.01481200  |
| H  | -1.27864400 | 5.80654900  | 1.56093800  |   |             |             |             |
| O  | -1.23851600 | 5.63811300  | -0.76982400 |   |             |             |             |
| H  | -2.01185900 | 5.25353700  | -1.20489600 |   |             |             |             |
| O  | 0.56179100  | -0.75281600 | -2.95507900 |   |             |             |             |
| H  | -0.15276300 | -1.40200500 | -2.97929700 |   |             |             |             |
| O  | 0.35332800  | -0.06247900 | 1.24739200  |   |             |             |             |
| H  | -0.27460100 | -0.44342600 | 1.88847500  |   |             |             |             |
| O  | -2.05478000 | -5.19154800 | 0.34206700  |   |             |             |             |
| H  | -2.84729100 | -5.63677700 | 0.01130600  |   |             |             |             |
| O  | -4.04336800 | -4.25166200 | -1.30031700 |   |             |             |             |
| H  | -4.90909000 | -3.82158300 | -1.28778100 |   |             |             |             |
| O  | -4.70123100 | -1.72642700 | 0.01641600  |   |             |             |             |
| H  | -4.37312100 | -1.04582600 | -0.59803700 |   |             |             |             |



|    |             |             |             |   |             |             |             |
|----|-------------|-------------|-------------|---|-------------|-------------|-------------|
| C1 |             |             |             | H | -0.73529600 | 3.55449000  | 0.10647600  |
| C  | 2.56854500  | 3.18662200  | -0.83221000 | C | 2.20598500  | 1.62260700  | 2.71488000  |
| C  | 1.19433500  | 3.85880400  | -0.82614000 | H | 3.27700900  | 1.46451900  | 2.84307800  |
| C  | 0.19080600  | 2.99487800  | -0.05199400 | C | -1.15546400 | -2.60022000 | -1.31931300 |
| C  | 1.90391500  | 1.95915300  | 1.26032600  | O | 1.56688700  | 0.41622000  | 3.14916300  |
| C  | 3.01275900  | 2.76681900  | 0.57210500  | H | 0.66347100  | 0.38096800  | 2.78820700  |
| H  | 2.51288400  | 2.28760000  | -1.46155500 | H | 1.89966100  | 2.46193800  | 3.34824400  |
| H  | 1.77497600  | 1.02230900  | 0.70704200  | H | 2.94711900  | -2.69023500 | -3.32077700 |
| H  | 3.24664800  | 3.65967100  | 1.15684600  | H | 4.23127800  | -3.26538600 | -2.24907800 |
| O  | 0.65889600  | 2.67683200  | 1.23959100  | O | 4.23891500  | -1.23918100 | -2.75974900 |
| C  | -1.26210600 | 1.11961700  | -0.68869500 | H | 4.73861800  | -0.96305900 | -1.97920200 |
| C  | -1.64968200 | 0.70588000  | 0.73833700  | H | -0.65777000 | -2.70846000 | -2.28735100 |
| C  | -1.07075200 | -0.10508600 | -1.58765100 | H | -1.78838400 | -3.47489300 | -1.13642400 |
| C  | -2.93491600 | -0.12815600 | 0.63355700  | O | -0.19113500 | -2.47525100 | -0.26579400 |
| H  | -1.82760100 | 1.58139900  | 1.36162700  | H | 0.83963700  | 3.96151200  | -1.85962000 |
| C  | -1.98798800 | -1.32226500 | -1.30045200 | H | -0.03566400 | -0.41720300 | -1.43132100 |
| H  | -3.27944400 | -0.42300600 | 1.62757900  | H | -2.07522200 | 1.73602200  | -1.08374200 |
| H  | -2.74256000 | -1.35904800 | -2.09085000 | O | -3.91355600 | 0.65949000  | -0.01100500 |
| O  | -2.65837300 | -1.33995400 | -0.02179400 | C | -5.24724500 | 0.31139100  | 0.10399500  |
| C  | 3.54113300  | -2.43343700 | -2.44261600 | C | -5.69467400 | -0.94206600 | 0.52324200  |
| C  | 2.60462400  | -2.25171500 | -1.24739600 | C | -6.16074000 | 1.30817000  | -0.24496900 |
| C  | 3.33688400  | -2.13498100 | 0.09264700  | C | -7.06840400 | -1.17898700 | 0.60864800  |
| C  | 0.80887800  | -3.47747200 | -0.17044400 | H | -4.99349500 | -1.73278500 | 0.75622000  |
| C  | 2.31920100  | -2.04075100 | 1.22097400  | C | -7.52487800 | 1.05335500  | -0.16369800 |
| H  | 3.96228100  | -3.02314100 | 0.23298600  | H | -5.78689400 | 2.27252100  | -0.57078900 |
| C  | 1.43082000  | -3.28921600 | 1.22008600  | C | -7.98726800 | -0.19114800 | 0.26790200  |
| H  | 0.36756000  | -4.47348300 | -0.26235400 | H | -7.41485000 | -2.15407100 | 0.93594900  |
| H  | 1.69709400  | -1.16009100 | 1.04759700  | H | -8.22961400 | 1.83298300  | -0.43423000 |
| O  | 1.74581100  | -3.40406500 | -1.22081500 | H | -9.05197800 | -0.38749500 | 0.33301000  |
| O  | 4.18006200  | -0.96726000 | 0.07899000  | H | 0.61393800  | -3.15827700 | 1.94102900  |
| H  | 4.60608400  | -0.93586500 | 0.94799000  | O | -0.02555500 | 1.83386800  | -0.82783800 |
| O  | 2.99862000  | -1.89605100 | 2.46284500  | H | 2.01097000  | -1.34400700 | -1.41329300 |
| H  | 2.56778200  | -1.15693300 | 2.93864900  |   |             |             |             |
| O  | 2.17558300  | -4.45323700 | 1.53406700  |   |             |             |             |
| H  | 2.66742700  | -4.26702200 | 2.34614600  |   |             |             |             |
| O  | -1.26023700 | 0.20559200  | -2.96550900 |   |             |             |             |
| H  | -0.55244700 | 0.80038000  | -3.24348600 |   |             |             |             |
| O  | -0.66273000 | -0.06982700 | 1.41194300  |   |             |             |             |
| H  | -0.62417800 | -0.96054700 | 1.01988500  |   |             |             |             |
| O  | 1.24137200  | 5.12509300  | -0.19291900 |   |             |             |             |
| H  | 2.01757300  | 5.58777100  | -0.53830600 |   |             |             |             |
| O  | 3.48088600  | 4.11973600  | -1.40540700 |   |             |             |             |
| H  | 4.37805300  | 3.78877300  | -1.26493900 |   |             |             |             |
| O  | 4.23338400  | 2.02765500  | 0.49415500  |   |             |             |             |
| H  | 4.06208800  | 1.15408800  | 0.10263500  |   |             |             |             |

|    |             |             |             |   |             |             |             |
|----|-------------|-------------|-------------|---|-------------|-------------|-------------|
| C2 |             |             |             | H | 0.99280900  | 3.40930000  | 0.05902600  |
| C  | -2.34622900 | 3.69251200  | 0.93878400  | C | -2.24729300 | 1.99635200  | -2.55518300 |
| C  | -0.85062800 | 4.03087100  | 0.98848900  | H | -3.32977700 | 1.93409900  | -2.66517200 |
| C  | -0.01465100 | 3.00782200  | 0.20647300  | C | 1.02242200  | -2.77572700 | 1.08635800  |
| C  | -1.90981200 | 2.36177100  | -1.11998700 | O | -1.72388200 | 0.72085200  | -2.93020200 |
| C  | -2.81337300 | 3.42729400  | -0.49897700 | H | -0.81825600 | 0.61725500  | -2.58524200 |
| H  | -2.53605000 | 2.78855400  | 1.52436800  | H | -1.87290400 | 2.77409600  | -3.23177700 |
| H  | -1.97141000 | 1.45727000  | -0.50803900 | H | -2.80748100 | -3.76115900 | 3.06497900  |
| H  | -2.73811500 | 4.35481600  | -1.08836700 | H | -4.16999200 | -4.03131500 | 1.96909000  |
| O  | -0.54712000 | 2.85377200  | -1.10185700 | O | -4.11369000 | -2.21738700 | 3.00282700  |
| C  | 1.20859900  | 0.98808400  | 0.74938600  | H | -4.58796500 | -1.69019800 | 2.34323300  |
| C  | 1.60854300  | 0.67217400  | -0.69889100 | H | 0.49640300  | -2.96872400 | 2.02544000  |
| C  | 0.91348900  | -0.29826200 | 1.51781000  | H | 1.66788500  | -3.62932200 | 0.85361400  |
| C  | 2.87263400  | -0.19648300 | -0.63662100 | O | 0.09487800  | -2.55875300 | 0.01897800  |
| H  | 1.82395600  | 1.58368400  | -1.25546900 | H | -0.51294000 | 4.07340600  | 2.02501200  |
| C  | 1.84684700  | -1.49743900 | 1.19160100  | H | -0.10984500 | -0.57523500 | 1.25484400  |
| H  | 3.21987600  | -0.43561100 | -1.64460200 | H | 2.04569000  | 1.50999300  | 1.22172600  |
| H  | 2.56857700  | -1.58059500 | 2.00858800  | O | 3.86306100  | 0.53525500  | 0.05826700  |
| O  | 2.56993500  | -1.43697100 | -0.05790800 | C | 5.19052400  | 0.16931400  | -0.07343700 |
| C  | -3.45591900 | -3.27898500 | 2.33142900  | C | 5.61489500  | -1.06986500 | -0.55471300 |
| C  | -2.59994200 | -2.77582100 | 1.16820000  | C | 6.12227200  | 1.12966400  | 0.32587600  |
| C  | -3.42621800 | -2.34856700 | -0.04998200 | C | 6.98394000  | -1.32836800 | -0.65061800 |
| C  | -0.84280200 | -3.58915400 | -0.26846100 | H | 4.89915300  | -1.83447800 | -0.82728200 |
| C  | -2.49544500 | -1.93956100 | -1.18270800 | C | 7.48157300  | 0.85316500  | 0.23335900  |
| H  | -4.04695600 | -3.19233700 | -0.37409500 | H | 5.76667100  | 2.08335700  | 0.70009100  |
| C  | -1.56108000 | -3.10484900 | -1.53486800 | C | 7.92088400  | -0.37665500 | -0.25974600 |
| H  | -0.32938900 | -4.53817000 | -0.44688000 | H | 7.31232300  | -2.29233300 | -1.02586000 |
| H  | -1.89949700 | -1.08625900 | -0.84655500 | H | 8.20057000  | 1.60442800  | 0.54372400  |
| O  | -1.70764200 | -3.84330400 | 0.80815700  | H | 8.98175200  | -0.58998400 | -0.33330300 |
| O  | -4.25786400 | -1.25864500 | 0.35025100  | H | -0.79810400 | -2.76109600 | -2.24621600 |
| H  | -4.66372400 | -0.88728600 | -0.44488500 | O | 0.02261400  | 1.79285300  | 0.90566500  |
| O  | -3.27350900 | -1.55292800 | -2.31158200 | H | -2.02532500 | -1.91140600 | 1.52378500  |
| H  | -2.82828800 | -0.78389400 | -2.72036600 |   |             |             |             |
| O  | -2.27870300 | -4.19373100 | -2.08603200 |   |             |             |             |
| H  | -2.87321300 | -3.83005400 | -2.75767700 |   |             |             |             |
| O  | 1.00460100  | -0.11579200 | 2.92752700  |   |             |             |             |
| H  | 0.24786800  | 0.40600700  | 3.22142000  |   |             |             |             |
| O  | 0.60987500  | -0.01920300 | -1.44128500 |   |             |             |             |
| H  | 0.53079800  | -0.93526800 | -1.11800600 |   |             |             |             |
| O  | -0.62883200 | 5.34370200  | 0.46091100  |   |             |             |             |
| H  | -0.61467000 | 5.29731400  | -0.50520200 |   |             |             |             |
| O  | -3.12707500 | 4.71995000  | 1.53700000  |   |             |             |             |
| H  | -2.72702300 | 5.56893100  | 1.29613000  |   |             |             |             |
| O  | -4.15222900 | 2.95975300  | -0.51694700 |   |             |             |             |
| H  | -4.66814200 | 3.52110700  | 0.07832100  |   |             |             |             |

|    |             |             |             |   |             |             |             |
|----|-------------|-------------|-------------|---|-------------|-------------|-------------|
| C3 |             |             |             | H | -0.89949700 | 3.84612700  | 0.11986500  |
| C  | 2.32528600  | 4.26025200  | -1.03484700 | C | 2.54795600  | 2.31043500  | 2.32655600  |
| C  | 0.83087300  | 4.57948700  | -0.92962500 | H | 3.62267000  | 2.10764700  | 2.31677700  |
| C  | 0.08948900  | 3.47671200  | -0.16200600 | C | -1.07203700 | -2.26301800 | -1.93186000 |
| C  | 2.09166200  | 2.73725700  | 0.93646900  | O | 1.80940100  | 1.18429100  | 2.78764500  |
| C  | 2.91953200  | 3.87015100  | 0.31944100  | H | 2.22452200  | 0.34526800  | 2.51697800  |
| H  | 2.45261300  | 3.41423500  | -1.72782600 | H | 2.35956500  | 3.12228500  | 3.03281800  |
| H  | 2.13008000  | 1.86185700  | 0.27095400  | H | 2.71332100  | -5.81684200 | -1.86229300 |
| H  | 2.90888800  | 4.73538200  | 0.98531500  | H | 3.41348700  | -5.88299900 | -0.23811300 |
| O  | 0.72753800  | 3.16533200  | 1.06264200  | O | 4.51797400  | -4.91451100 | -1.72020200 |
| C  | -1.11099100 | 1.44817200  | -0.82442800 | H | 4.96738900  | -4.26995900 | -1.15482400 |
| C  | -1.43210800 | 1.03762000  | 0.62348700  | H | -0.85429400 | -2.21172600 | -2.99962800 |
| C  | -0.73090700 | 0.21943500  | -1.64403100 | H | -1.76062400 | -3.09439100 | -1.75161800 |
| C  | -2.56045000 | -0.00515200 | 0.56900800  | O | 0.17261800  | -2.49004100 | -1.26703700 |
| H  | -1.78620600 | 1.89549500  | 1.20273100  | H | 0.40463500  | 4.64628300  | -1.93842800 |
| C  | -1.71737100 | -0.95025200 | -1.49415600 | H | 0.25091400  | -0.10767100 | -1.29409400 |
| H  | -2.78019600 | -0.35955600 | 1.57792700  | H | -1.99865500 | 1.92339200  | -1.25534200 |
| H  | -2.58425400 | -0.75495600 | -2.13737900 | O | -3.69755000 | 0.62643500  | 0.00691800  |
| O  | -2.15734700 | -1.14932800 | -0.14185500 | C | -4.94680500 | 0.07146000  | 0.19914500  |
| C  | 3.27584400  | -5.24432500 | -1.12338200 | C | -5.16447200 | -1.24024700 | 0.62432700  |
| C  | 2.46811900  | -4.00292800 | -0.74325800 | C | -6.02830900 | 0.91200100  | -0.07592000 |
| C  | 3.03676100  | -3.26895200 | 0.48123200  | C | -6.47511800 | -1.69338200 | 0.78896800  |
| C  | 0.22469800  | -3.37238800 | -0.17543800 | H | -4.33294000 | -1.90935700 | 0.80230800  |
| C  | 2.11760500  | -2.12486100 | 0.90236400  | C | -7.32706800 | 0.44288200  | 0.08371900  |
| H  | 3.11137500  | -3.98964200 | 1.30902000  | H | -5.83310500 | 1.92624700  | -0.40641700 |
| C  | 0.68170800  | -2.62713000 | 1.08459400  | C | -7.55882600 | -0.86250600 | 0.52106600  |
| H  | -0.74273800 | -3.84987400 | -0.00287500 | H | -6.64143000 | -2.71313000 | 1.12147500  |
| H  | 2.14177800  | -1.34557500 | 0.13911500  | H | -8.16198800 | 1.10265100  | -0.12954600 |
| O  | 1.12786100  | -4.43951600 | -0.44270700 | H | -8.57280500 | -1.22620700 | 0.64785300  |
| O  | 4.34797800  | -2.79988600 | 0.15880700  | H | 0.02285500  | -1.78615900 | 1.28395300  |
| H  | 4.68130000  | -2.29857800 | 0.91447000  | O | 0.00792200  | 2.34503200  | -0.99508200 |
| O  | 2.60705700  | -1.51526600 | 2.11136500  | H | 2.44704900  | -3.32380000 | -1.60047000 |
| H  | 2.25791800  | -2.03892700 | 2.84999000  |   |             |             |             |
| O  | 0.61139900  | -3.47994200 | 2.23648300  |   |             |             |             |
| H  | 0.87235000  | -4.37542500 | 1.97962600  |   |             |             |             |
| O  | -0.68249800 | 0.51098500  | -3.03933000 |   |             |             |             |
| H  | -0.02269800 | 1.20162400  | -3.17601300 |   |             |             |             |
| O  | -0.35799300 | 0.39061500  | 1.26904100  |   |             |             |             |
| H  | 0.18044700  | 0.99792500  | 1.80881900  |   |             |             |             |
| O  | 0.62147400  | 5.78991900  | -0.22352200 |   |             |             |             |
| H  | 1.24039000  | 6.44113400  | -0.58251200 |   |             |             |             |
| O  | 2.95915400  | 5.41828300  | -1.56997700 |   |             |             |             |
| H  | 3.90921300  | 5.34902700  | -1.40511600 |   |             |             |             |
| O  | 4.30494700  | 3.53682200  | 0.17008600  |   |             |             |             |
| H  | 4.38875400  | 2.74007800  | -0.37225700 |   |             |             |             |

|    |             |             |             |   |             |             |             |
|----|-------------|-------------|-------------|---|-------------|-------------|-------------|
| C4 |             |             |             | H | -0.56382000 | 3.91814400  | -0.09692500 |
| C  | 2.70775100  | 3.22618800  | -1.03083600 | C | 2.24712200  | 1.90947100  | 2.61512700  |
| C  | 1.42371000  | 4.06504900  | -0.98547000 | H | 3.24123400  | 1.46360800  | 2.70470100  |
| C  | 0.33049700  | 3.30036200  | -0.22805300 | C | -1.24546900 | -2.31291800 | -1.77843900 |
| C  | 1.94307100  | 2.16281600  | 1.14312700  | O | 1.26410600  | 1.07294100  | 3.21845100  |
| C  | 3.12636700  | 2.73797600  | 0.36387700  | H | 1.54944900  | 0.14242700  | 3.12920200  |
| H  | 2.53379300  | 2.34717100  | -1.65488600 | H | 2.24278700  | 2.85924000  | 3.15667800  |
| H  | 1.66389600  | 1.22051600  | 0.66892000  | H | 3.51559600  | -4.38220900 | -2.38070800 |
| H  | 3.56965900  | 3.57821800  | 0.91831300  | H | 4.23652500  | -4.61153600 | -0.78078700 |
| O  | 0.80287800  | 3.04776700  | 1.09319800  | O | 4.91835000  | -2.99820500 | -1.91393200 |
| C  | -1.18196000 | 1.41924300  | -0.79691500 | H | 5.11856200  | -2.39394200 | -1.18277900 |
| C  | -1.57091700 | 1.04173300  | 0.64396700  | H | -1.11864200 | -2.38562100 | -2.86140800 |
| C  | -0.94564000 | 0.17767600  | -1.65685500 | H | -1.86896800 | -3.14376800 | -1.43633900 |
| C  | -2.76322200 | 0.07399600  | 0.56710200  | O | 0.04985200  | -2.36500400 | -1.17523600 |
| H  | -1.87456700 | 1.93229500  | 1.20243900  | H | 1.09625000  | 4.28999800  | -2.00192300 |
| C  | -1.92783100 | -0.98731100 | -1.43745600 | H | 0.05370300  | -0.17410800 | -1.40185600 |
| H  | -3.05195700 | -0.23311000 | 1.57441300  | H | -1.98471300 | 2.02486800  | -1.22842400 |
| H  | -2.78444000 | -0.84647700 | -2.10659300 | O | -3.83108500 | 0.75737000  | -0.06781900 |
| O  | -2.39645300 | -1.11223800 | -0.08675200 | C | -5.12026200 | 0.28474700  | 0.07494000  |
| C  | 3.87237100  | -3.85635000 | -1.49363500 | C | -5.43970800 | -0.99214300 | 0.53994600  |
| C  | 2.70683800  | -3.08490900 | -0.87356100 | C | -6.13278600 | 1.17493300  | -0.29152700 |
| C  | 3.05440800  | -2.48699400 | 0.50711200  | C | -6.78247000 | -1.35900500 | 0.65307500  |
| C  | 0.40959800  | -3.40214500 | -0.30291300 | H | -4.66146900 | -1.70176400 | 0.78823200  |
| C  | 1.81072800  | -1.88391300 | 1.16444400  | C | -7.46434100 | 0.79124900  | -0.18204100 |
| H  | 3.43035700  | -3.29848100 | 1.14182300  | H | -5.85929100 | 2.16021800  | -0.65270700 |
| C  | 0.62047300  | -2.85572300 | 1.11499400  | C | -7.79806400 | -0.47753400 | 0.29525000  |
| H  | -0.34156200 | -4.19723900 | -0.29418200 | H | -7.02771800 | -2.35182000 | 1.01674100  |
| H  | 1.52062100  | -0.96949900 | 0.64432400  | H | -8.24516700 | 1.48938100  | -0.46627400 |
| O  | 1.61001800  | -4.01507100 | -0.74145400 | H | -8.83762000 | -0.77436400 | 0.38282200  |
| O  | 4.14650500  | -1.57057100 | 0.39979700  | H | -0.27415300 | -2.33390900 | 1.45262100  |
| H  | 3.85645300  | -0.64758100 | 0.33697000  | O | 0.06833400  | 2.13238100  | -0.94566200 |
| O  | 2.06584900  | -1.50416300 | 2.52130500  | H | 2.41765800  | -2.28408700 | -1.56105300 |
| H  | 1.95472800  | -2.29480600 | 3.07053800  |   |             |             |             |
| O  | 0.83573800  | -3.93024500 | 2.03920400  |   |             |             |             |
| H  | 1.38668000  | -4.60156600 | 1.61220700  |   |             |             |             |
| O  | -1.01035000 | 0.48003800  | -3.05048000 |   |             |             |             |
| H  | -0.24189900 | 1.01555400  | -3.28038700 |   |             |             |             |
| O  | -0.54949600 | 0.33848500  | 1.31627000  |   |             |             |             |
| H  | -0.15137700 | 0.85709700  | 2.04158500  |   |             |             |             |
| O  | 1.67180800  | 5.32796600  | -0.36526200 |   |             |             |             |
| H  | 1.60140600  | 5.22002700  | 0.59411500  |   |             |             |             |
| O  | 3.77486700  | 3.93873800  | -1.64547400 |   |             |             |             |
| H  | 3.73082000  | 4.85611600  | -1.33737800 |   |             |             |             |
| O  | 4.08776800  | 1.68224300  | 0.25800900  |   |             |             |             |
| H  | 4.81607900  | 1.99257100  | -0.29690900 |   |             |             |             |

|    |             |             |             |   |             |             |             |
|----|-------------|-------------|-------------|---|-------------|-------------|-------------|
| D1 |             |             |             | H | 0.71369800  | 3.57069500  | 0.03445500  |
| C  | -2.59334500 | 3.19287700  | 0.95229500  | C | -2.24092700 | 1.78015900  | -2.65720600 |
| C  | -1.21162600 | 3.84823300  | 0.98206300  | H | -3.31152800 | 1.62499900  | -2.79237900 |
| C  | -0.21610400 | 3.01087000  | 0.16888400  | C | 1.10614500  | -2.63030300 | 1.19451500  |
| C  | -1.94007300 | 2.05057200  | -1.18893300 | O | -1.59741800 | 0.59768100  | -3.14687600 |
| C  | -3.03918300 | 2.84538900  | -0.47079800 | H | -0.69613600 | 0.54589000  | -2.78284100 |
| H  | -2.54899900 | 2.26407200  | 1.53802300  | H | -1.93781500 | 2.64889700  | -3.25143200 |
| H  | -1.82430600 | 1.08996400  | -0.67579400 | H | -4.23153600 | -3.32641200 | 2.09642400  |
| H  | -3.25015400 | 3.76869200  | -1.01596500 | H | -4.31316600 | -1.57439900 | 2.36746000  |
| O  | -0.68696600 | 2.75402400  | -1.13520400 | O | -2.93939500 | -2.51567600 | 3.51468500  |
| C  | 1.23108000  | 1.10825500  | 0.72212900  | H | -2.34899600 | -3.27800300 | 3.46597600  |
| C  | 1.61301200  | 0.75531400  | -0.72321600 | H | 0.61652600  | -2.77037100 | 2.16274600  |
| C  | 1.04742000  | -0.15082300 | 1.57405400  | H | 1.72738200  | -3.50372100 | 0.97007900  |
| C  | 2.89312800  | -0.09011700 | -0.66297100 | O | 0.13357800  | -2.45244100 | 0.15646800  |
| H  | 1.79418500  | 1.65713800  | -1.30702000 | H | -0.85773200 | 3.89679400  | 2.01979800  |
| C  | 1.95173900  | -1.36124400 | 1.22211200  | H | 0.00804600  | -0.45126700 | 1.42463900  |
| H  | 3.23089100  | -0.34256800 | -1.67083900 | H | 2.04495500  | 1.70938600  | 1.13862900  |
| H  | 2.71281100  | -1.43965800 | 2.00316500  | O | 3.88055200  | 0.66081700  | 0.01107500  |
| O  | 2.61088100  | -1.32897100 | -0.06146400 | C | 5.21146700  | 0.31426200  | -0.13570300 |
| C  | -3.63515800 | -2.42320200 | 2.28075900  | C | 5.64840000  | -0.92459900 | -0.60640600 |
| C  | -2.68710900 | -2.20090400 | 1.11174600  | C | 6.13332400  | 1.29501200  | 0.23577100  |
| C  | -3.39764500 | -2.03217600 | -0.23153400 | C | 7.01984300  | -1.16249300 | -0.72030900 |
| C  | -0.88156200 | -3.43494500 | 0.03523300  | H | 4.94065900  | -1.70374500 | -0.85804600 |
| C  | -2.35581900 | -1.95264700 | -1.34282200 | C | 7.49528200  | 1.03914000  | 0.12543500  |
| H  | -4.05635700 | -2.89040200 | -0.40397700 | H | 5.76761300  | 2.24815500  | 0.60136000  |
| C  | -1.49305900 | -3.21713800 | -1.35476700 | C | 7.94696400  | -0.19031100 | -0.35747700 |
| H  | -0.45805700 | -4.43982600 | 0.11499100  | H | 7.35815400  | -2.12604000 | -1.08781800 |
| H  | -1.71789300 | -1.08918500 | -1.14307000 | H | 8.20662700  | 1.80645600  | 0.41330500  |
| O  | -1.83089900 | -3.36269400 | 1.07531300  | H | 9.00993500  | -0.38722900 | -0.44533300 |
| O  | -4.18034600 | -0.83127800 | -0.20252500 | H | -0.67037900 | -3.09221900 | -2.07013500 |
| H  | -4.59842500 | -0.76689300 | -1.07310900 | O | -0.00582000 | 1.81504100  | 0.89188600  |
| O  | -3.00923000 | -1.76976000 | -2.59364200 | H | -2.07951800 | -1.31056500 | 1.31537300  |
| H  | -2.58241100 | -1.00473700 | -3.02949200 |   |             |             |             |
| O  | -2.25702100 | -4.36432900 | -1.68604500 |   |             |             |             |
| H  | -2.73993100 | -4.16081800 | -2.49924500 |   |             |             |             |
| O  | 1.26507600  | 0.10101200  | 2.95967300  |   |             |             |             |
| H  | 0.53997000  | 0.64516400  | 3.29070300  |   |             |             |             |
| O  | 0.62009900  | 0.01706200  | -1.42866000 |   |             |             |             |
| H  | 0.57514200  | -0.88917200 | -1.07545400 |   |             |             |             |
| O  | -1.24260600 | 5.14441200  | 0.41118300  |   |             |             |             |
| H  | -2.01749300 | 5.59629200  | 0.77353200  |   |             |             |             |
| O  | -3.49929500 | 4.10558000  | 1.56723300  |   |             |             |             |
| H  | -4.39871400 | 3.80187900  | 1.38420200  |   |             |             |             |
| O  | -4.27573100 | 2.13246200  | -0.42879800 |   |             |             |             |
| H  | -4.12788200 | 1.23412800  | -0.08445100 |   |             |             |             |

|    |              |              |              |   |              |              |              |
|----|--------------|--------------|--------------|---|--------------|--------------|--------------|
| D2 |              |              |              | H | 1. 17769100  | 3. 43924000  | 0. 13119900  |
| C  | -2. 10750300 | 3. 96139800  | 1. 09834200  | C | -2. 22275400 | 2. 27793100  | -2. 40132700 |
| C  | -0. 58973800 | 4. 18495200  | 1. 11307300  | H | -3. 30986400 | 2. 27929700  | -2. 47932500 |
| C  | 0. 14824300  | 3. 10956100  | 0. 30286800  | C | 0. 80259800  | -2. 74101400 | 1. 05580500  |
| C  | -1. 82308600 | 2. 61250500  | -0. 97472200 | O | -1. 78338200 | 0. 97776000  | -2. 79728800 |
| C  | -2. 62918900 | 3. 73901800  | -0. 32819400 | H | -0. 88117000 | 0. 81419400  | -2. 46575900 |
| H  | -2. 35110900 | 3. 07123900  | 1. 68534000  | H | -1. 82361200 | 3. 03769800  | -3. 08438500 |
| H  | -1. 93350200 | 1. 71090500  | -0. 36503000 | H | -4. 29211600 | -4. 39792100 | 1. 53927500  |
| H  | -2. 49822000 | 4. 66079500  | -0. 91703600 | H | -4. 47577900 | -2. 88117100 | 2. 44411500  |
| O  | -0. 42836600 | 3. 00532800  | -0. 99086900 | O | -2. 99533300 | -4. 07726000 | 3. 13632500  |
| C  | 1. 24002900  | 1. 00431800  | 0. 79477000  | H | -2. 34805600 | -4. 70436800 | 2. 78992600  |
| C  | 1. 58367700  | 0. 68600900  | -0. 66688400 | H | 0. 28404700  | -2. 92951000 | 2. 00037200  |
| C  | 0. 87542500  | -0. 27131500 | 1. 55199800  | H | 1. 38486900  | -3. 62663800 | 0. 78009700  |
| C  | 2. 79100700  | -0. 26180600 | -0. 64812700 | O | -0. 13092900 | -2. 42602500 | 0. 01821500  |
| H  | 1. 84434300  | 1. 59022500  | -1. 21580500 | H | -0. 22445300 | 4. 19381700  | 2. 14105400  |
| C  | 1. 71589100  | -1. 52640200 | 1. 18119400  | H | -0. 17265000 | -0. 47266000 | 1. 31690900  |
| H  | 3. 09565500  | -0. 50877300 | -1. 66785500 | H | 2. 12252100  | 1. 45876300  | 1. 25416900  |
| H  | 2. 43893400  | -1. 68064600 | 1. 98649500  | O | 3. 84408500  | 0. 39803800  | 0. 02699600  |
| O  | 2. 42836800  | -1. 48870300 | -0. 07506200 | C | 5. 14226500  | -0. 04545000 | -0. 15030300 |
| C  | -3. 74928100 | -3. 58384400 | 2. 03778500  | C | 5. 47582000  | -1. 30318200 | -0. 65448000 |
| C  | -2. 86972500 | -2. 87088700 | 1. 02185500  | C | 6. 14258400  | 0. 85317900  | 0. 22612800  |
| C  | -3. 65517700 | -2. 29846400 | -0. 16145800 | C | 6. 82301000  | -1. 64269200 | -0. 79630800 |
| C  | -1. 01380900 | -3. 44907100 | -0. 42255200 | H | 4. 70682500  | -2. 02050400 | -0. 90989700 |
| C  | -2. 68421800 | -1. 75462200 | -1. 20408200 | C | 7. 47911800  | 0. 49622000  | 0. 08819100  |
| H  | -4. 26150100 | -3. 09283900 | -0. 61477900 | H | 5. 85742900  | 1. 82311900  | 0. 61839800  |
| C  | -1. 70846200 | -2. 85087100 | -1. 65104000 | C | 7. 82765200  | -0. 75292600 | -0. 42822600 |
| H  | -0. 45463500 | -4. 35170200 | -0. 68570700 | H | 7. 08053600  | -2. 62100300 | -1. 18933400 |
| H  | -2. 12286700 | -0. 93337400 | -0. 74785600 | H | 8. 25161800  | 1. 19991000  | 0. 38100600  |
| O  | -1. 91059500 | -3. 85509900 | 0. 57643900  | H | 8. 87083400  | -1. 02893800 | -0. 53751500 |
| O  | -4. 49049200 | -1. 26400700 | 0. 34191300  | H | -0. 93617500 | -2. 41466800 | -2. 29922100 |
| H  | -4. 86226200 | -0. 79811800 | -0. 41939400 | O | 0. 11791200  | 1. 88823900  | 0. 99239700  |
| O  | -3. 42768700 | -1. 26057300 | -2. 31414700 | H | -2. 33962000 | -2. 05344500 | 1. 52522600  |
| H  | -2. 95195600 | -0. 47764700 | -2. 65750000 |   |              |              |              |
| O  | -2. 37897800 | -3. 89172600 | -2. 33743400 |   |              |              |              |
| H  | -2. 97545000 | -3. 47051100 | -2. 97292000 |   |              |              |              |
| O  | 1. 02076000  | -0. 11845100 | 2. 96090100  |   |              |              |              |
| H  | 0. 31619700  | 0. 45650000  | 3. 28362100  |   |              |              |              |
| O  | 0. 52561900  | 0. 07248600  | -1. 39327900 |   |              |              |              |
| H  | 0. 37628800  | -0. 83287800 | -1. 06332600 |   |              |              |              |
| O  | -0. 28247600 | 5. 48178400  | 0. 58849500  |   |              |              |              |
| H  | -0. 29771100 | 5. 44259800  | -0. 37794200 |   |              |              |              |
| O  | -2. 79319300 | 5. 04124500  | 1. 72023500  |   |              |              |              |
| H  | -2. 33618000 | 5. 85910900  | 1. 47313500  |   |              |              |              |
| O  | -3. 99875900 | 3. 37367200  | -0. 31368500 |   |              |              |              |
| H  | -4. 45760500 | 3. 97096100  | 0. 29316100  |   |              |              |              |

|    |             |             |             |   |             |             |             |
|----|-------------|-------------|-------------|---|-------------|-------------|-------------|
| D3 |             |             |             | H | -0.64863000 | 3.74370300  | -0.09514400 |
| C  | 2.64201500  | 3.27474400  | -1.03391000 | C | 2.27742200  | 1.95299500  | 2.60860200  |
| C  | 1.28706700  | 3.98469000  | -1.04067300 | H | 3.31314300  | 1.62355600  | 2.72641300  |
| C  | 0.26994400  | 3.16702800  | -0.23432100 | C | -1.13917900 | -2.53921900 | -1.37761100 |
| C  | 1.97178200  | 2.16588400  | 1.13054400  | O | 1.37383800  | 1.02109300  | 3.20505200  |
| C  | 3.09150100  | 2.89894500  | 0.38028100  | H | 1.76418000  | 0.13113300  | 3.20099400  |
| H  | 2.55090600  | 2.35290700  | -1.62492300 | H | 2.15625200  | 2.90149900  | 3.13686700  |
| H  | 1.82278300  | 1.18917400  | 0.65539800  | H | 4.35267300  | -3.85496000 | -1.47290800 |
| H  | 3.37337100  | 3.80665200  | 0.91897600  | H | 4.49546600  | -2.18424700 | -2.05296500 |
| O  | 0.73835000  | 2.89921800  | 1.07108200  | O | 3.31073300  | -3.35038500 | -3.20242700 |
| C  | -1.17632800 | 1.24197400  | -0.78528900 | H | 2.65202300  | -4.04880400 | -3.09709800 |
| C  | -1.58197600 | 0.93439800  | 0.66576400  | H | -0.74091100 | -2.68523900 | -2.38696800 |
| C  | -0.90223100 | -0.04951300 | -1.55163200 | H | -1.80899000 | -3.36745800 | -1.12357900 |
| C  | -2.81251500 | 0.01381300  | 0.60394800  | O | -0.08707600 | -2.44251200 | -0.41708000 |
| H  | -1.86835500 | 1.85346300  | 1.18470700  | H | 0.92781000  | 4.06358400  | -2.07457800 |
| C  | -1.88812600 | -1.20957500 | -1.29509300 | H | 0.09105600  | -0.36682500 | -1.23442400 |
| H  | -3.12966500 | -0.24541800 | 1.61600100  | H | -1.99325800 | 1.79373000  | -1.26058500 |
| H  | -2.65707300 | -1.17489900 | -2.07455500 | O | -3.84159100 | 0.73758300  | -0.05996500 |
| O  | -2.51935900 | -1.21021000 | -0.00708900 | C | -5.15229200 | 0.33508100  | 0.08023100  |
| C  | 3.80117500  | -3.01333200 | -1.91645100 | C | -5.54387800 | -0.90731200 | 0.58368600  |
| C  | 2.68258000  | -2.59320100 | -0.97442500 | C | -6.11480700 | 1.26179000  | -0.33004400 |
| C  | 3.17928200  | -2.16498700 | 0.41056200  | C | -6.90496400 | -1.20102700 | 0.69037600  |
| C  | 0.66296900  | -3.53678900 | -0.02754600 | H | -4.80690400 | -1.64712100 | 0.86712800  |
| C  | 2.00336200  | -1.98536400 | 1.37486600  | C | -7.46547000 | 0.95061900  | -0.22616700 |
| H  | 3.85256800  | -2.94253400 | 0.79998900  | H | -5.78675000 | 2.21907700  | -0.72002000 |
| C  | 1.11929000  | -3.23484000 | 1.40842200  | C | -7.87003800 | -0.28242300 | 0.28873000  |
| H  | 0.10621000  | -4.47778600 | -0.08412600 | H | -7.20522100 | -2.16706700 | 1.08402900  |
| H  | 1.38761100  | -1.14667700 | 1.05014600  | H | -8.20573100 | 1.67770500  | -0.54459100 |
| O  | 1.81787200  | -3.74719000 | -0.84869600 | H | -8.92449900 | -0.52290600 | 0.37167100  |
| O  | 3.91857500  | -0.94608200 | 0.28071100  | H | 0.24586100  | -3.04934100 | 2.03430400  |
| H  | 4.25573500  | -0.72736900 | 1.16017500  | O | 0.04650600  | 1.98334500  | -0.96450700 |
| O  | 2.49324800  | -1.63267300 | 2.67782400  | H | 2.11962100  | -1.77282400 | -1.42914300 |
| H  | 2.65519300  | -2.44588500 | 3.17799300  |   |             |             |             |
| O  | 1.80507900  | -4.33958600 | 1.99947400  |   |             |             |             |
| H  | 2.35808800  | -4.76431300 | 1.32924000  |   |             |             |             |
| O  | -0.91250700 | 0.15489200  | -2.96481200 |   |             |             |             |
| H  | -0.19447900 | 0.76135300  | -3.18386200 |   |             |             |             |
| O  | -0.58984600 | 0.22999900  | 1.38373100  |   |             |             |             |
| H  | -0.13448400 | 0.79781800  | 2.03045800  |   |             |             |             |
| O  | 1.37416500  | 5.26876700  | -0.44881000 |   |             |             |             |
| H  | 2.14850400  | 5.70630200  | -0.82894500 |   |             |             |             |
| O  | 3.57600600  | 4.15471000  | -1.65622600 |   |             |             |             |
| H  | 4.46573900  | 3.81461500  | -1.49229900 |   |             |             |             |
| O  | 4.28527300  | 2.10970300  | 0.31551300  |   |             |             |             |
| H  | 4.07650300  | 1.24374700  | -0.07109200 |   |             |             |             |

|    |             |             |             |   |             |             |             |
|----|-------------|-------------|-------------|---|-------------|-------------|-------------|
| D4 |             |             |             | H | 0.49791500  | -3.93039500 | -0.06259100 |
| C  | 3.67497200  | -3.22332600 | 1.12621600  | C | 3.27750300  | -1.32162600 | -2.24628500 |
| C  | 2.38940900  | -4.04642900 | 0.97555100  | H | 4.19781200  | -0.73501600 | -2.19032200 |
| C  | 1.31566700  | -3.25792800 | 0.21357200  | C | -1.72790300 | 1.77977100  | 1.87651300  |
| C  | 2.96718400  | -1.89002100 | -0.86950200 | O | 2.19168400  | -0.54295000 | -2.73985900 |
| C  | 4.12906700  | -2.63898600 | -0.21810000 | H | 2.28551000  | 0.39582000  | -2.49273700 |
| H  | 3.49506700  | -2.39037700 | 1.81132700  | H | 3.43173800  | -2.13854300 | -2.95656700 |
| H  | 2.66414300  | -1.07044200 | -0.21038200 | H | 1.07099900  | 6.70646700  | 0.09553900  |
| H  | 4.44482900  | -3.45873500 | -0.88306600 | H | 2.33878200  | 6.20779700  | 1.23336900  |
| O  | 1.85455400  | -2.80309200 | -1.02349300 | O | 0.53689500  | 6.52782000  | 2.09854000  |
| C  | -0.49255900 | -1.73703200 | 0.82836800  | H | -0.39265400 | 6.32728000  | 1.92889500  |
| C  | -0.92183200 | -1.48017700 | -0.62697200 | H | -1.51386000 | 1.82053500  | 2.94543500  |
| C  | -0.55930800 | -0.44298900 | 1.63327000  | H | -2.65861700 | 2.32221500  | 1.68216600  |
| C  | -2.33815500 | -0.88227800 | -0.59268800 | O | -0.63165300 | 2.41038300  | 1.21221100  |
| H  | -0.96021000 | -2.41558200 | -1.19384400 | H | 2.01391400  | -4.33450200 | 1.95867900  |
| C  | -1.88374400 | 0.31988400  | 1.45767900  | H | 0.25763800  | 0.19526200  | 1.28960500  |
| H  | -2.65534600 | -0.63817600 | -1.60828500 | H | -1.16615400 | -2.48136300 | 1.26577500  |
| H  | -2.63840200 | -0.14934700 | 2.10086900  | O | -3.19824500 | -1.85536900 | -0.02516200 |
| O  | -2.35360200 | 0.33895000  | 0.10106200  | C | -4.55967200 | -1.76091400 | -0.23388200 |
| C  | 1.28647100  | 6.08646400  | 0.97832600  | C | -5.20350300 | -0.61287600 | -0.69886000 |
| C  | 1.00900500  | 4.62763700  | 0.65081600  | C | -5.29608900 | -2.91018500 | 0.06388100  |
| C  | 1.82842800  | 4.10378700  | -0.53530900 | C | -6.58774200 | -0.63623700 | -0.88235500 |
| C  | -0.87668900 | 3.23200800  | 0.09979500  | H | -4.64659400 | 0.29409100  | -0.89432500 |
| C  | 1.34774400  | 2.70689100  | -0.93760500 | C | -6.67466900 | -2.91424000 | -0.11471900 |
| H  | 1.68994500  | 4.78576800  | -1.38909900 | H | -4.77350400 | -3.78839900 | 0.42679500  |
| C  | -0.16979100 | 2.67641700  | -1.14132000 | C | -7.32920200 | -1.77784400 | -0.59344800 |
| H  | -1.94783700 | 3.33666700  | -0.08899200 | H | -7.08521100 | 0.25703300  | -1.24657000 |
| H  | 1.62941800  | 1.99985000  | -0.15559500 | H | -7.23937200 | -3.81177400 | 0.11639900  |
| O  | -0.40451300 | 4.55210000  | 0.34301100  | H | -8.40451400 | -1.78346700 | -0.73531000 |
| O  | 3.19620500  | 4.09646000  | -0.15174700 | H | -0.49243700 | 1.65647400  | -1.33252600 |
| H  | 3.70024300  | 3.66021300  | -0.85121500 | O | 0.86619100  | -2.20018500 | 1.01040100  |
| O  | 2.03006500  | 2.27062300  | -2.12801700 | H | 1.21085900  | 4.01452000  | 1.53337200  |
| H  | 1.55076300  | 2.64996600  | -2.88125600 |   |             |             |             |
| O  | -0.51987600 | 3.43676200  | -2.30702400 |   |             |             |             |
| H  | -0.56824900 | 4.37228800  | -2.06548000 |   |             |             |             |
| O  | -0.43752100 | -0.68626000 | 3.03298400  |   |             |             |             |
| H  | 0.44739300  | -1.03015900 | 3.20358300  |   |             |             |             |
| O  | -0.12678800 | -0.51615400 | -1.27743400 |   |             |             |             |
| H  | 0.59813200  | -0.90012500 | -1.80597800 |   |             |             |             |
| O  | 2.66987200  | -5.27496900 | 0.29665500  |   |             |             |             |
| H  | 2.69509100  | -5.10831800 | -0.65606900 |   |             |             |             |
| O  | 4.71808900  | -3.99442100 | 1.71128500  |   |             |             |             |
| H  | 4.65932500  | -4.88967400 | 1.34544000  |   |             |             |             |
| O  | 5.20657200  | -1.73333000 | -0.03597100 |   |             |             |             |
| H  | 5.85245900  | -2.15742200 | 0.54577700  |   |             |             |             |



|    |             |             |             |   |             |             |             |
|----|-------------|-------------|-------------|---|-------------|-------------|-------------|
| E1 |             |             |             | H | -3.39225500 | 2.27400000  | -0.54352800 |
| C  | -5.04310200 | -0.33412200 | 1.03437100  | C | -3.12683200 | -1.85621400 | -1.99407900 |
| C  | -4.78089200 | 1.12883800  | 0.64822200  | H | -3.27501300 | -2.91059500 | -1.76286700 |
| C  | -3.44466600 | 1.27863300  | -0.09413000 | C | 2.26041800  | 0.04865500  | 1.62078800  |
| C  | -3.46943400 | -1.01740600 | -0.77626800 | O | -1.75785600 | -1.68921800 | -2.36253400 |
| C  | -4.83948900 | -1.28399400 | -0.15666200 | H | -1.54036000 | -0.74115300 | -2.32448100 |
| H  | -4.34459600 | -0.63260400 | 1.82102200  | H | -3.77946000 | -1.58748600 | -2.83412600 |
| H  | -2.69929000 | -1.19091000 | -0.01920600 | H | 5.22909700  | -3.67542900 | -1.10366900 |
| H  | -5.61909600 | -1.09683500 | -0.91206400 | H | 5.55661900  | -4.38413700 | 0.49022400  |
| O  | -3.42085200 | 0.37089400  | -1.18637900 | O | 5.97328200  | -2.40488700 | 0.36748400  |
| C  | -1.11895800 | 1.71301000  | 0.61536700  | H | 5.60919400  | -1.61488400 | -0.05143500 |
| C  | -0.62795100 | 1.88665000  | -0.83228200 | H | 2.33999300  | 0.03581500  | 2.70769100  |
| C  | -0.14179200 | 0.86997100  | 1.44018500  | H | 3.25736400  | 0.21205900  | 1.20167000  |
| C  | 0.78569600  | 2.48677700  | -0.77078400 | O | 1.76267200  | -1.24123900 | 1.26784900  |
| H  | -1.28575000 | 2.54713900  | -1.39832500 | H | -4.78940900 | 1.75669200  | 1.54051300  |
| C  | 1.34196500  | 1.20993600  | 1.21487100  | H | -0.30354000 | -0.17386200 | 1.16032000  |
| H  | 1.18207000  | 2.62195900  | -1.78067500 | H | -1.19054100 | 2.71342200  | 1.05313100  |
| H  | 1.59525100  | 2.08059000  | 1.82816600  | O | 0.73105600  | 3.71121900  | -0.08875600 |
| O  | 1.63626200  | 1.52621600  | -0.16973800 | C | 1.77240100  | 4.61606300  | -0.23770400 |
| C  | 5.16275400  | -3.50631700 | -0.02025100 | C | 3.04813500  | 4.26505400  | -0.67793100 |
| C  | 3.70703400  | -3.30323800 | 0.37043100  | C | 1.47568200  | 5.93555300  | 0.10530900  |
| C  | 2.79653700  | -4.45301800 | -0.05110400 | C | 4.02325000  | 5.25878700  | -0.78884900 |
| C  | 1.95733700  | -1.69095400 | -0.06334200 | H | 3.29315000  | 3.23602200  | -0.90734600 |
| C  | 1.34796400  | -4.12676300 | 0.31586200  | C | 2.46048600  | 6.91131700  | -0.00146600 |
| H  | 2.86939800  | -4.57960200 | -1.14087400 | H | 0.47600100  | 6.17906400  | 0.44754000  |
| C  | 0.89990100  | -2.79478000 | -0.30116400 | C | 3.73874100  | 6.57886900  | -0.45316800 |
| H  | 1.81095500  | -0.87811200 | -0.77696600 | H | 5.01618000  | 4.98633500  | -1.13137900 |
| H  | 1.27616400  | -4.06658700 | 1.40520000  | H | 2.22603200  | 7.93664100  | 0.26522200  |
| O  | 3.27938600  | -2.10099300 | -0.30588300 | H | 4.50485200  | 7.34184900  | -0.53758400 |
| O  | 3.22616000  | -5.63431900 | 0.61239000  | H | -0.02993400 | -2.47741200 | 0.18021600  |
| H  | 2.52406900  | -6.29187100 | 0.51144700  | O | -2.39090500 | 1.05305100  | 0.80205900  |
| O  | 0.48563200  | -5.18713700 | -0.07972900 | H | 3.64173200  | -3.15248600 | 1.45381600  |
| H  | 0.29558200  | -5.04681700 | -1.02056600 |   |             |             |             |
| O  | 0.67714200  | -3.00213800 | -1.69167900 |   |             |             |             |
| H  | -0.18205600 | -2.61578200 | -1.95036200 |   |             |             |             |
| O  | -0.36364000 | 1.02984900  | 2.83644500  |   |             |             |             |
| H  | -1.19794300 | 0.60418200  | 3.06690300  |   |             |             |             |
| O  | -0.52788200 | 0.67547800  | -1.57728800 |   |             |             |             |
| H  | 0.34516900  | 0.29138900  | -1.41337800 |   |             |             |             |
| O  | -5.84646900 | 1.61622300  | -0.17381000 |   |             |             |             |
| H  | -5.70411600 | 1.31351900  | -1.08180400 |   |             |             |             |
| O  | -6.34443400 | -0.49523200 | 1.58475600  |   |             |             |             |
| H  | -6.94607600 | 0.07802500  | 1.08655200  |   |             |             |             |
| O  | -4.89471400 | -2.63715600 | 0.26189500  |   |             |             |             |
| H  | -5.67927600 | -2.74484000 | 0.81701800  |   |             |             |             |

|    |             |             |             |   |             |             |             |
|----|-------------|-------------|-------------|---|-------------|-------------|-------------|
| F1 |             |             |             | H | -4.10945100 | -0.22581600 | -0.51005800 |
| C  | -3.80706900 | -3.29624000 | 1.07120400  | C | -1.39606200 | -3.33744800 | -1.98590100 |
| C  | -4.49459300 | -1.97610200 | 0.69280300  | H | -0.86312600 | -4.26022600 | -1.75879700 |
| C  | -3.53724100 | -1.04493300 | -0.06603400 | C | 1.74448400  | 1.47245000  | 1.58050600  |
| C  | -2.16763300 | -2.88256800 | -0.76061200 | O | -0.42241000 | -2.36525600 | -2.36707000 |
| C  | -3.08508900 | -3.92774700 | -0.12969500 | H | -0.83069500 | -1.48251800 | -2.32318600 |
| H  | -3.05980100 | -3.10691500 | 1.84686800  | H | -2.08525100 | -3.52743700 | -2.81818000 |
| H  | -1.44469600 | -2.54982400 | -0.01038200 | H | 6.08763200  | 1.49328100  | 0.15843100  |
| H  | -3.82855400 | -4.25241300 | -0.87456800 | H | 6.45339700  | 0.28105000  | -1.07783400 |
| O  | -2.97937000 | -1.75295500 | -1.16396800 | O | 7.29247700  | 0.00641700  | 0.81371200  |
| C  | -1.95882800 | 0.72525400  | 0.62162500  | H | 7.33920000  | -0.96030600 | 0.78096100  |
| C  | -1.69022000 | 1.15993300  | -0.82988800 | H | 1.83017100  | 1.51131200  | 2.66648900  |
| C  | -0.66271100 | 0.66189100  | 1.43461900  | H | 2.43216300  | 2.20546600  | 1.14924700  |
| C  | -0.94018900 | 2.50001200  | -0.77919300 | O | 2.12523500  | 0.14455300  | 1.22035600  |
| H  | -2.61982100 | 1.27573000  | -1.38829200 | H | -4.86845000 | -1.48106900 | 1.59035100  |
| C  | 0.30360100  | 1.83523500  | 1.19382400  | H | -0.15599500 | -0.26503600 | 1.15475800  |
| H  | -0.72075300 | 2.84878400  | -1.79178600 | H | -2.62779400 | 1.46990800  | 1.06390600  |
| H  | -0.01767200 | 2.68109100  | 1.80986900  | O | -1.72622900 | 3.43477500  | -0.08921700 |
| O  | 0.32697900  | 2.26244500  | -0.19183900 | C | -1.45428400 | 4.78759300  | -0.23521600 |
| C  | 6.22001600  | 0.42343900  | -0.01312100 | C | -0.23609200 | 5.28904900  | -0.69241000 |
| C  | 4.91555300  | -0.29895300 | 0.32689200  | C | -2.48862700 | 5.65075200  | 0.12789200  |
| C  | 4.88705800  | -1.75170700 | -0.14688600 | C | -0.07135800 | 6.67175000  | -0.80080100 |
| C  | 2.55820200  | -0.08199000 | -0.11253700 | H | 0.58191100  | 4.62384800  | -0.93703500 |
| C  | 3.55607700  | -2.39844500 | 0.22545800  | C | -2.30518000 | 7.02504700  | 0.02307800  |
| H  | 4.99894400  | -1.76035600 | -1.23993500 | H | -3.42372800 | 5.23256300  | 0.48358200  |
| C  | 2.38321700  | -1.60052700 | -0.36369200 | C | -1.09670500 | 7.54294100  | -0.44593100 |
| H  | 1.94965200  | 0.48071800  | -0.82287400 | H | 0.87620900  | 7.06265000  | -1.15685600 |
| H  | 3.47372600  | -2.42403600 | 1.31533300  | H | -3.11210200 | 7.69358200  | 0.30476500  |
| O  | 3.85583900  | 0.40490000  | -0.34287000 | H | -0.95645000 | 8.61518500  | -0.52867400 |
| O  | 5.97509600  | -2.45404200 | 0.45497400  | H | 1.45773800  | -1.91633800 | 0.12647900  |
| H  | 5.82968100  | -3.39973400 | 0.31443100  | O | -2.55190900 | -0.57803100 | 0.81449800  |
| O  | 3.52442400  | -3.75345400 | -0.20801300 | H | 4.76690400  | -0.25859700 | 1.41234600  |
| H  | 3.26372100  | -3.73288300 | -1.14243700 |   |             |             |             |
| O  | 2.31181200  | -1.88516200 | -1.75673300 |   |             |             |             |
| H  | 1.39386400  | -2.11506900 | -2.00021200 |   |             |             |             |
| O  | -0.92275900 | 0.66013900  | 2.83369800  |   |             |             |             |
| H  | -1.31610900 | -0.18735300 | 3.07316700  |   |             |             |             |
| O  | -0.87575600 | 0.26093600  | -1.57799000 |   |             |             |             |
| H  | 0.05111900  | 0.48771100  | -1.41623600 |   |             |             |             |
| O  | -5.65073800 | -2.23831200 | -0.10913200 |   |             |             |             |
| H  | -5.37067700 | -2.39290100 | -1.02224700 |   |             |             |             |
| O  | -4.73364000 | -4.21514800 | 1.63633700  |   |             |             |             |
| H  | -5.56771800 | -4.12538800 | 1.15148300  |   |             |             |             |
| O  | -2.30091500 | -5.03604000 | 0.27804700  |   |             |             |             |
| H  | -2.85022900 | -5.59691300 | 0.84289600  |   |             |             |             |

|    |             |             |             |   |             |             |             |
|----|-------------|-------------|-------------|---|-------------|-------------|-------------|
| G1 |             |             |             | H | -0.74509300 | -1.86102500 | 1.84206700  |
| C  | -2.10750800 | -4.67770900 | 0.35754300  | C | -3.44522900 | -1.60533900 | -1.59995800 |
| C  | -1.49598600 | -3.85987000 | 1.50084700  | H | -3.93879400 | -2.15477700 | -2.40668400 |
| C  | -0.98045400 | -2.50530700 | 0.99673500  | C | 1.31065300  | 2.05523800  | -0.90864900 |
| C  | -2.49546700 | -2.53680800 | -0.87636600 | O | -2.69160200 | -0.51374300 | -2.12672300 |
| C  | -3.13173200 | -3.85426200 | -0.43331400 | H | -3.24485400 | 0.28797600  | -2.18890900 |
| H  | -1.31681000 | -4.99019500 | -0.32917400 | H | -4.20900000 | -1.24387100 | -0.90051400 |
| H  | -1.64892900 | -2.75645400 | -1.53461900 | H | -2.40259000 | 2.73593100  | -3.02424200 |
| H  | -3.99458600 | -3.63360600 | 0.21555400  | H | -3.50075900 | 3.94499700  | -2.34078600 |
| O  | -2.02064800 | -1.83503700 | 0.29230600  | O | -4.02773900 | 1.94461900  | -2.09473100 |
| C  | 1.13241400  | -1.70863300 | 0.02023000  | H | -4.51880200 | 2.06226200  | -1.26598900 |
| C  | 2.00304700  | -1.52041600 | 1.27500600  | H | 0.78909800  | 2.05498400  | -1.86760900 |
| C  | 0.59316300  | -0.36140900 | -0.49658200 | H | 2.18283300  | 2.71613400  | -0.97339700 |
| C  | 3.13923000  | -0.54236800 | 0.96488100  | O | 0.43946200  | 2.52968100  | 0.13049700  |
| H  | 2.40960500  | -2.48451200 | 1.58417700  | H | -0.68292300 | -4.41798800 | 1.96660900  |
| C  | 1.76605300  | 0.64488900  | -0.60313400 | H | -0.16191300 | 0.03285600  | 0.18931400  |
| H  | 3.71850600  | -0.33353000 | 1.86781800  | H | 1.77468200  | -2.11580900 | -0.76382500 |
| H  | 2.38941000  | 0.32301500  | -1.44514800 | O | 3.95991100  | -1.11389600 | -0.02830500 |
| O  | 2.57850900  | 0.70036300  | 0.58682400  | C | 5.23851900  | -0.62499700 | -0.21832700 |
| C  | -3.03289600 | 2.96873700  | -2.16556400 | C | 5.67540400  | 0.61912100  | 0.23894500  |
| C  | -2.18095400 | 2.99415200  | -0.89844000 | C | 6.10130800  | -1.45934400 | -0.93231900 |
| C  | -2.92066400 | 3.54563900  | 0.32216200  | C | 6.99302000  | 1.00970400  | -0.01005400 |
| C  | -0.07337900 | 3.80561200  | -0.09813900 | H | 4.99939800  | 1.28617800  | 0.75800400  |
| C  | -1.99130400 | 3.56796400  | 1.53628100  | C | 7.40695200  | -1.05166200 | -1.18018600 |
| H  | -3.24703200 | 4.57193600  | 0.09564900  | H | 5.73523300  | -2.41969300 | -1.27806500 |
| C  | -0.69477900 | 4.32120500  | 1.20652700  | C | 7.86213500  | 0.18422000  | -0.71702300 |
| H  | 0.70930400  | 4.49337700  | -0.43742900 | H | 7.33216100  | 1.97677400  | 0.34748500  |
| H  | -1.75583500 | 2.53724400  | 1.81353500  | H | 8.07338600  | -1.70556500 | -1.73333400 |
| O  | -1.04223500 | 3.83559900  | -1.14933800 | H | 8.88205100  | 0.49939700  | -0.90916000 |
| O  | -4.07336200 | 2.73979100  | 0.56648400  | H | 0.01897800  | 4.20789300  | 2.02341400  |
| H  | -4.43569100 | 2.98506700  | 1.42898700  | O | 0.14936200  | -2.74197300 | 0.19446900  |
| O  | -2.65817700 | 4.13929300  | 2.65614600  | H | -1.84700200 | 1.97334100  | -0.68990800 |
| H  | -2.53657000 | 5.09965800  | 2.60942700  |   |             |             |             |
| O  | -0.95674700 | 5.72512200  | 1.11384600  |   |             |             |             |
| H  | -1.27928300 | 5.93035200  | 0.22540900  |   |             |             |             |
| O  | 0.07217500  | -0.47608100 | -1.80451600 |   |             |             |             |
| H  | -0.90537300 | -0.48063000 | -1.81437500 |   |             |             |             |
| O  | 1.28268700  | -1.01551700 | 2.40141200  |   |             |             |             |
| H  | 1.19757500  | -0.05614400 | 2.30450000  |   |             |             |             |
| O  | -2.47137700 | -3.66269700 | 2.53242200  |   |             |             |             |
| H  | -3.01645900 | -2.89794600 | 2.30130700  |   |             |             |             |
| O  | -2.70994100 | -5.87519700 | 0.84157300  |   |             |             |             |
| H  | -3.14228600 | -5.65909200 | 1.68138600  |   |             |             |             |
| O  | -3.57363300 | -4.56609100 | -1.57952300 |   |             |             |             |
| H  | -3.76407300 | -5.47257900 | -1.30083900 |   |             |             |             |

|    |             |             |             |   |             |             |             |
|----|-------------|-------------|-------------|---|-------------|-------------|-------------|
| H1 |             |             |             | H | 2.90363600  | -0.46229200 | 1.66936400  |
| C  | 5.97879900  | 0.69384600  | 0.54304600  | C | 4.81683500  | -2.07745800 | -1.92735800 |
| C  | 4.90191200  | 0.38757900  | 1.59341200  | H | 5.34859600  | -1.83626400 | -2.84611300 |
| C  | 3.60211100  | -0.08016900 | 0.92734600  | C | -1.01213500 | -1.32181400 | -1.44194500 |
| C  | 4.78624200  | -0.86360800 | -1.01256100 | O | 3.48481500  | -2.46242400 | -2.30229400 |
| C  | 6.14692900  | -0.47243700 | -0.43998500 | H | 3.11014100  | -2.96349100 | -1.56850700 |
| H  | 5.69060200  | 1.58234000  | -0.02389600 | H | 5.32514200  | -2.91914000 | -1.44363000 |
| H  | 4.37200100  | -0.01359800 | -1.56160600 | H | -3.07784200 | -2.82126700 | 2.98041200  |
| H  | 6.56660400  | -1.33676500 | 0.09949500  | H | -3.00179000 | -1.07484800 | 3.27544300  |
| O  | 3.89871300  | -1.19549400 | 0.07560400  | O | -1.26902000 | -1.87416200 | 2.57557200  |
| C  | 1.66641700  | 1.07899600  | -0.07446000 | H | -0.99192500 | -2.61095100 | 2.01689700  |
| C  | 0.82969000  | 1.38212400  | 1.17845800  | H | -0.71207400 | -2.05918800 | -0.69268100 |
| C  | 1.10379200  | -0.11741300 | -0.85814400 | H | -0.61177800 | -1.61932200 | -2.41490600 |
| C  | -0.61591400 | 1.62806300  | 0.74809100  | O | -2.44260600 | -1.27779300 | -1.50753400 |
| H  | 1.22801600  | 2.27989500  | 1.65709800  | H | 4.70936800  | 1.27506600  | 2.19740200  |
| C  | -0.42800600 | 0.03330400  | -1.05743900 | H | 1.29729300  | -1.03579500 | -0.29248400 |
| H  | -1.25233700 | 1.78230300  | 1.62361800  | H | 1.60344500  | 1.95111100  | -0.72801000 |
| H  | -0.60006900 | 0.76284600  | -1.85449700 | O | -0.64074200 | 2.76223700  | -0.08752000 |
| O  | -1.11561100 | 0.46287100  | 0.12909400  | C | -1.83058100 | 3.43711300  | -0.29153600 |
| C  | -2.70089800 | -1.86695000 | 2.59129500  | C | -3.08626000 | 2.93575600  | 0.05166600  |
| C  | -3.26443300 | -1.58848400 | 1.20934200  | C | -1.71031600 | 4.69336300  | -0.88970600 |
| C  | -4.78489500 | -1.50034700 | 1.12835500  | C | -4.21912400 | 3.71513900  | -0.19184900 |
| C  | -3.06665200 | -2.43678100 | -1.03335500 | H | -3.19708300 | 1.95012100  | 0.48378200  |
| C  | -5.20192700 | -1.27561300 | -0.33295300 | C | -2.84852000 | 5.45289300  | -1.13456600 |
| H  | -5.22724900 | -2.44082500 | 1.49422200  | H | -0.72285300 | 5.05846200  | -1.14951000 |
| C  | -4.57585600 | -2.31693900 | -1.27136100 | C | -4.11040500 | 4.97001500  | -0.78313000 |
| H  | -2.67943200 | -3.33307800 | -1.53189300 | H | -5.19402700 | 3.32287500  | 0.07901700  |
| H  | -4.86768300 | -0.27874100 | -0.63124600 | H | -2.74771400 | 6.42920600  | -1.59764100 |
| O  | -2.82140200 | -2.67267000 | 0.35318800  | H | -4.99721900 | 5.56516800  | -0.97236900 |
| O  | -5.21896000 | -0.42282000 | 1.94611600  | H | -4.76912800 | -2.04379900 | -2.30945300 |
| H  | -6.15164200 | -0.26229200 | 1.74665000  | O | 3.07432100  | 1.00549900  | 0.21511800  |
| O  | -6.62108900 | -1.26819200 | -0.44413600 | H | -2.82807200 | -0.65955800 | 0.84380100  |
| H  | -6.90886200 | -2.18657800 | -0.55632800 |   |             |             |             |
| O  | -5.20391400 | -3.58963700 | -1.08262300 |   |             |             |             |
| H  | -4.81463500 | -4.01839100 | -0.30781100 |   |             |             |             |
| O  | 1.66853600  | -0.20389400 | -2.15578000 |   |             |             |             |
| H  | 2.29093900  | -0.94882700 | -2.22500000 |   |             |             |             |
| O  | 0.86854400  | 0.34373800  | 2.15409400  |   |             |             |             |
| H  | 0.09158100  | -0.24032400 | 2.10269100  |   |             |             |             |
| O  | 5.38146200  | -0.60649700 | 2.50589200  |   |             |             |             |
| H  | 5.22397500  | -1.48102600 | 2.12454900  |   |             |             |             |
| O  | 7.22742100  | 0.99954500  | 1.15622000  |   |             |             |             |
| H  | 7.32387100  | 0.41237500  | 1.92100700  |   |             |             |             |
| O  | 7.00721300  | -0.12226500 | -1.51311700 |   |             |             |             |
| H  | 7.78591800  | 0.30918400  | -1.13499000 |   |             |             |             |

|    |             |             |             |   |             |             |             |
|----|-------------|-------------|-------------|---|-------------|-------------|-------------|
| I1 |             |             |             | H | 0.59551400  | 2.01100600  | 1.86383700  |
| C  | 1.89641800  | 4.67555600  | 0.06871600  | C | 3.53824900  | 1.45151000  | -1.34279100 |
| C  | 1.29260800  | 3.98476500  | 1.29733400  | H | 3.89373400  | 1.80489400  | -2.31072700 |
| C  | 0.86123200  | 2.55296100  | 0.95847100  | C | -1.31593800 | -2.27133600 | -0.50588900 |
| C  | 2.47222400  | 2.40224100  | -0.82445000 | O | 3.00258400  | 0.12969400  | -1.51599900 |
| C  | 2.99641500  | 3.81532300  | -0.56591400 | H | 3.27325600  | -0.42791100 | -0.76467100 |
| H  | 1.11481700  | 4.84081800  | -0.67674800 | H | 4.38834500  | 1.41767900  | -0.65352700 |
| H  | 1.65452400  | 2.45471200  | -1.55015700 | H | 1.80821600  | -3.24249600 | -3.16845500 |
| H  | 3.84660800  | 3.75471900  | 0.13245100  | H | 2.96762000  | -4.36391200 | -2.44169000 |
| O  | 1.97624900  | 1.84599200  | 0.40869000  | O | 3.70944200  | -2.49673800 | -2.71485400 |
| C  | -1.18457100 | 1.58058300  | -0.02481500 | H | 3.41002900  | -1.57723800 | -2.79957800 |
| C  | -2.12469800 | 1.55522200  | 1.19269400  | H | -0.87599700 | -2.42009600 | -1.49342200 |
| C  | -0.61241800 | 0.18209400  | -0.31137700 | H | -2.17925600 | -2.93951100 | -0.40157500 |
| C  | -3.23351200 | 0.52641900  | 0.95570500  | O | -0.35542600 | -2.55306100 | 0.51195000  |
| H  | -2.55532500 | 2.54652500  | 1.34193600  | H | 0.43524300  | 4.55323200  | 1.65961300  |
| C  | -1.77896500 | -0.83212600 | -0.38687100 | H | 0.06654800  | -0.12242600 | 0.48887900  |
| H  | -3.85472000 | 0.42526200  | 1.84920200  | H | -1.77958800 | 1.87222400  | -0.89309500 |
| H  | -2.36617100 | -0.60331000 | -1.28320500 | O | -4.00912200 | 0.95530200  | -0.14000700 |
| O  | -2.64230900 | -0.74454900 | 0.76690400  | C | -5.27554500 | 0.42962500  | -0.32152000 |
| C  | 2.59336300  | -3.33904000 | -2.41165400 | C | -5.72105100 | -0.75337000 | 0.26937900  |
| C  | 2.01102100  | -3.03526200 | -1.02943500 | C | -6.11350900 | 1.15740700  | -1.16877700 |
| C  | 3.05100700  | -3.13316600 | 0.09698600  | C | -7.02405100 | -1.18895300 | 0.01826200  |
| C  | 0.27066100  | -3.81198900 | 0.41099500  | H | -5.06224800 | -1.34231700 | 0.89416700  |
| C  | 2.39196400  | -2.96577700 | 1.45915900  | C | -7.40450300 | 0.70494700  | -1.41640800 |
| H  | 3.54468500  | -4.11043000 | 0.05402200  | H | -5.74137400 | 2.07216300  | -1.61668000 |
| C  | 1.20368700  | -3.91815600 | 1.62191100  | C | -7.86920100 | -0.46903100 | -0.82072400 |
| H  | -0.46150600 | -4.62528300 | 0.42299700  | H | -7.36981100 | -2.10844400 | 0.47963700  |
| H  | 2.03332900  | -1.93288200 | 1.54783900  | H | -8.05225000 | 1.27577500  | -2.07388700 |
| O  | 0.95699600  | -3.97573200 | -0.81560200 | H | -8.87776300 | -0.81860300 | -1.01309500 |
| O  | 4.03869900  | -2.08967500 | -0.01064100 | H | 0.63798500  | -3.63149400 | 2.51671700  |
| H  | 4.50991800  | -2.24153000 | -0.84717200 | O | -0.21453700 | 2.63818700  | 0.06085500  |
| O  | 3.30096300  | -3.25530900 | 2.51984500  | H | 1.59553000  | -2.02202000 | -1.03550200 |
| H  | 4.11794400  | -2.76500900 | 2.36202000  |   |             |             |             |
| O  | 1.63095200  | -5.26590700 | 1.71602200  |   |             |             |             |
| H  | 2.35573700  | -5.29298000 | 2.35569600  |   |             |             |             |
| O  | 0.04826000  | 0.12999500  | -1.56572900 |   |             |             |             |
| H  | 1.01075400  | 0.21002900  | -1.45541400 |   |             |             |             |
| O  | -1.46179500 | 1.22267100  | 2.41380800  |   |             |             |             |
| H  | -1.37669600 | 0.25966900  | 2.46574600  |   |             |             |             |
| O  | 2.23895900  | 3.98420900  | 2.37207100  |   |             |             |             |
| H  | 2.83315500  | 3.22857500  | 2.26634100  |   |             |             |             |
| O  | 2.41212800  | 5.96230500  | 0.39630200  |   |             |             |             |
| H  | 2.82194600  | 5.89525300  | 1.27178400  |   |             |             |             |
| O  | 3.43507300  | 4.36851700  | -1.79733400 |   |             |             |             |
| H  | 3.57502400  | 5.31547100  | -1.65845400 |   |             |             |             |

|    |             |             |             |   |             |             |             |
|----|-------------|-------------|-------------|---|-------------|-------------|-------------|
| J1 |             |             |             | H | 0.93045200  | -1.05778500 | -1.62659000 |
| C  | 2.36427500  | -4.05874400 | -0.65435100 | C | 3.21884300  | -1.48071200 | 2.12661500  |
| C  | 1.82343700  | -3.02748300 | -1.65277100 | H | 3.57716800  | -2.18998300 | 2.87726400  |
| C  | 1.14940300  | -1.85891600 | -0.92311500 | C | -1.47387900 | 2.29873200  | 0.78064800  |
| C  | 2.45441500  | -2.24106300 | 1.06504800  | O | 2.34135100  | -0.52618400 | 2.72085900  |
| C  | 3.22717300  | -3.39624200 | 0.42905700  | H | 2.82489800  | 0.30920300  | 2.86677000  |
| H  | 1.52631400  | -4.55773100 | -0.16127600 | H | 4.09089700  | -0.98406700 | 1.68315800  |
| H  | 1.53884100  | -2.63232600 | 1.51702500  | H | 2.18268500  | 3.06066800  | 3.13699900  |
| H  | 4.14683900  | -2.99959700 | -0.03122300 | H | 3.38781200  | 3.89063000  | 2.14253600  |
| O  | 2.08827100  | -1.30345800 | 0.01831000  | O | 3.72906300  | 1.87665700  | 2.55849400  |
| C  | -1.12681900 | -1.46474600 | -0.05536100 | H | 4.24760100  | 1.69467600  | 1.75965500  |
| C  | -1.95248800 | -1.27153600 | -1.33429300 | H | -0.97455700 | 2.40227200  | 1.74615100  |
| C  | -0.75737100 | -0.12622000 | 0.59941500  | H | -2.32653900 | 2.98588100  | 0.74180900  |
| C  | -3.18594600 | -0.42702700 | -1.00854600 | O | -0.56956100 | 2.58483200  | -0.29022600 |
| H  | -2.24878300 | -2.24545800 | -1.72705300 | H | 1.10968300  | -3.49952700 | -2.32852200 |
| C  | -1.95262300 | 0.86550600  | 0.61383100  | H | 0.05093300  | 0.33364800  | 0.02833100  |
| H  | -3.77712800 | -0.24494500 | -1.90982100 | H | -1.73495700 | -2.02714500 | 0.65451000  |
| H  | -2.58437500 | 0.60457500  | 1.46861400  | O | -3.94973500 | -1.11423800 | -0.04479900 |
| O  | -2.75214000 | 0.84849700  | -0.58709500 | C | -5.27249400 | -0.76125600 | 0.15211400  |
| C  | 2.83295400  | 2.95446300  | 2.26859500  | C | -5.82800400 | 0.44855800  | -0.26584000 |
| C  | 1.98579100  | 2.68147700  | 1.02334100  | C | -6.05147800 | -1.70230600 | 0.82826800  |
| C  | 2.84035800  | 2.59119600  | -0.25490800 | C | -7.17980900 | 0.69663200  | -0.01717000 |
| C  | 0.20670100  | 3.75430200  | -0.18101300 | H | -5.21930400 | 1.19835900  | -0.75431800 |
| C  | 2.00194000  | 2.65912700  | -1.53024500 | C | -7.39305700 | -1.43593400 | 1.07664800  |
| H  | 3.55325900  | 3.41922300  | -0.27251900 | H | -5.59351700 | -2.63282500 | 1.14478000  |
| C  | 1.01000100  | 3.82464900  | -1.48339500 | C | -7.96663800 | -0.23626400 | 0.65137700  |
| H  | -0.41574600 | 4.64579900  | -0.05879800 | H | -7.61128600 | 1.63736600  | -0.34393800 |
| H  | 1.43513300  | 1.72575100  | -1.63956700 | H | -7.99423900 | -2.17191700 | 1.60063500  |
| O  | 1.04175400  | 3.75144300  | 0.95893600  | H | -9.01429200 | -0.03168600 | 0.84373200  |
| O  | 3.65217100  | 1.40110300  | -0.24632700 | H | 0.31300200  | 3.73617300  | -2.32558600 |
| H  | 3.08316900  | 0.61266700  | -0.17718500 | O | -0.00167700 | -2.34067600 | -0.29242100 |
| O  | 2.82446400  | 2.86190500  | -2.67697400 | H | 1.45773100  | 1.73123000  | 1.16237000  |
| H  | 3.56353200  | 2.24078800  | -2.64302200 |   |             |             |             |
| O  | 1.67608900  | 5.07345000  | -1.51676100 |   |             |             |             |
| H  | 2.29650200  | 5.04941900  | -2.25801500 |   |             |             |             |
| O  | -0.38914000 | -0.27694000 | 1.95767200  |   |             |             |             |
| H  | 0.57210700  | -0.39473300 | 2.08185200  |   |             |             |             |
| O  | -1.22582500 | -0.62168200 | -2.37797100 |   |             |             |             |
| H  | -1.28694900 | 0.33557500  | -2.24067600 |   |             |             |             |
| O  | 2.88367700  | -2.55100700 | -2.48931400 |   |             |             |             |
| H  | 3.39092000  | -1.88573600 | -2.00465700 |   |             |             |             |
| O  | 3.10328400  | -5.08119100 | -1.31365400 |   |             |             |             |
| H  | 3.60141800  | -4.66300100 | -2.03174100 |   |             |             |             |
| O  | 3.57144800  | -4.32910500 | 1.44037700  |   |             |             |             |
| H  | 3.86472000  | -5.13985300 | 1.00175300  |   |             |             |             |

|    |             |             |             |   |             |             |             |
|----|-------------|-------------|-------------|---|-------------|-------------|-------------|
| J2 |             |             |             | H | 0.95121500  | -0.93733100 | -1.56346200 |
| C  | 2.40966500  | -3.95089300 | -0.73852200 | C | 3.17697600  | -1.50849200 | 2.18921500  |
| C  | 1.85713000  | -2.88269100 | -1.68582800 | H | 3.56335600  | -2.23864400 | 2.90642500  |
| C  | 1.15686100  | -1.77207700 | -0.89751900 | C | -1.47069500 | 2.30142400  | 0.76504200  |
| C  | 2.42276100  | -2.23321200 | 1.09169400  | O | 2.28860900  | -0.60331200 | 2.83702600  |
| C  | 3.23138900  | -3.33435000 | 0.39580400  | H | 2.74676100  | 0.25126400  | 2.95748500  |
| H  | 1.56131400  | -4.49756600 | -0.30145300 | H | 4.03393300  | -0.97650100 | 1.76022200  |
| H  | 1.51643200  | -2.67084900 | 1.53109800  | H | 2.12810600  | 3.00647600  | 3.15785900  |
| H  | 4.14951100  | -2.90974100 | -0.01579400 | H | 3.37497400  | 3.81578500  | 2.19810500  |
| O  | 2.02331200  | -1.25085000 | 0.11652100  | O | 3.67051100  | 1.79578400  | 2.61764200  |
| C  | -1.14830500 | -1.45686100 | -0.08261000 | H | 4.18465600  | 1.59485600  | 1.81892100  |
| C  | -1.96944000 | -1.24284000 | -1.36133600 | H | -0.97066500 | 2.40765200  | 1.73001800  |
| C  | -0.79165400 | -0.13166000 | 0.60511900  | H | -2.31038000 | 3.00384900  | 0.71712400  |
| C  | -3.20454800 | -0.40492100 | -1.02644400 | O | -0.55967900 | 2.55746900  | -0.30781400 |
| H  | -2.26380800 | -2.21109400 | -1.76937000 | H | 1.12808400  | -3.33916600 | -2.36499600 |
| C  | -1.97482400 | 0.87451400  | 0.61297300  | H | 0.03052100  | 0.33378300  | 0.06174800  |
| H  | -3.79555800 | -0.21224300 | -1.92559500 | H | -1.75602000 | -2.04000300 | 0.61095500  |
| H  | -2.61042800 | 0.62980400  | 1.46957600  | O | -3.96934400 | -1.10748600 | -0.07239900 |
| O  | -2.77569100 | 0.86501700  | -0.58732500 | C | -5.29042200 | -0.75558900 | 0.13204300  |
| C  | 2.80058300  | 2.88924800  | 2.30768800  | C | -5.84667600 | 0.45916700  | -0.27085300 |
| C  | 1.98648600  | 2.62895000  | 1.03875900  | C | -6.06884500 | -1.70318800 | 0.80010400  |
| C  | 2.87508800  | 2.53552800  | -0.21561700 | C | -7.19745300 | 0.70560800  | -0.01527500 |
| C  | 0.24325500  | 3.71105400  | -0.20781600 | H | -5.23874300 | 1.21382600  | -0.75264300 |
| C  | 2.05975200  | 2.57518800  | -1.50675400 | C | -7.40940400 | -1.43851900 | 1.05559500  |
| H  | 3.57088500  | 3.37804800  | -0.22595100 | H | -5.61079100 | -2.63755900 | 1.10501800  |
| C  | 1.06716000  | 3.74230500  | -1.49940100 | C | -7.98329800 | -0.23376600 | 0.64537500  |
| H  | -0.36167200 | 4.61790200  | -0.11285900 | H | -7.62896400 | 1.65032500  | -0.33033700 |
| H  | 1.49506800  | 1.63941200  | -1.60746300 | H | -8.00966300 | -2.17972900 | 1.57333300  |
| O  | 1.05687500  | 3.71037700  | 0.94685700  | H | -9.03015800 | -0.03031800 | 0.84325900  |
| O  | 3.70965000  | 1.36479800  | -0.17147500 | H | 0.38200500  | 3.63427600  | -2.34905000 |
| H  | 3.16190700  | 0.55810000  | -0.19042200 | O | -0.01342400 | -2.31214600 | -0.34015300 |
| O  | 2.89923500  | 2.75642300  | -2.64353300 | H | 1.44534500  | 1.68383900  | 1.16021600  |
| H  | 3.61147500  | 2.10435900  | -2.61045600 |   |             |             |             |
| O  | 1.73586500  | 4.98942600  | -1.55619500 |   |             |             |             |
| H  | 2.37833500  | 4.93829500  | -2.27717500 |   |             |             |             |
| O  | -0.44799000 | -0.31163100 | 1.96822500  |   |             |             |             |
| H  | 0.51050600  | -0.43452200 | 2.10157000  |   |             |             |             |
| O  | -1.23987700 | -0.57988400 | -2.39264100 |   |             |             |             |
| H  | -1.28440500 | 0.37485500  | -2.23317000 |   |             |             |             |
| O  | 2.90465000  | -2.26775700 | -2.42113900 |   |             |             |             |
| H  | 3.45689100  | -2.97689900 | -2.77835100 |   |             |             |             |
| O  | 3.20120700  | -4.83495600 | -1.52810000 |   |             |             |             |
| H  | 3.74090500  | -5.37334100 | -0.93381700 |   |             |             |             |
| O  | 3.67248500  | -4.35645000 | 1.29646000  |   |             |             |             |
| H  | 2.90864200  | -4.73334000 | 1.75517500  |   |             |             |             |

|    |             |             |             |   |             |             |             |
|----|-------------|-------------|-------------|---|-------------|-------------|-------------|
| K1 |             |             |             | H | 0.93272400  | -1.05707300 | -1.66178500 |
| C  | 2.48860100  | -3.97435300 | -0.61987400 | C | 3.14714700  | -1.32200900 | 2.14791100  |
| C  | 1.89761400  | -2.99472000 | -1.64161300 | H | 3.60746500  | -2.00271400 | 2.86887200  |
| C  | 1.16162300  | -1.84320600 | -0.94468200 | C | -1.42157900 | 2.20168300  | 0.95007100  |
| C  | 2.46153300  | -2.13957600 | 1.07250000  | O | 2.15139300  | -0.52024200 | 2.78410600  |
| C  | 3.31255600  | -3.24827700 | 0.45377300  | H | 2.50271900  | 0.33432700  | 3.09419800  |
| H  | 1.67658400  | -4.50670800 | -0.11789600 | H | 3.93382300  | -0.69791100 | 1.70770300  |
| H  | 1.56481400  | -2.58728400 | 1.51056000  | H | 3.62277600  | 3.64097800  | 1.97019900  |
| H  | 4.20614200  | -2.80009900 | -0.01024000 | H | 4.17240400  | 1.97728100  | 1.69507500  |
| O  | 2.05541800  | -1.23681800 | 0.01097600  | O | 2.85072700  | 2.16065200  | 3.21502000  |
| C  | -1.13233600 | -1.50242200 | -0.09624200 | H | 2.12270000  | 2.72746300  | 3.49921400  |
| C  | -1.90699700 | -1.19610600 | -1.38472800 | H | -0.90970700 | 2.22611400  | 1.91540300  |
| C  | -0.79284500 | -0.22831600 | 0.68925900  | H | -2.24317700 | 2.92672800  | 0.95861900  |
| C  | -3.15035900 | -0.37500300 | -1.03020600 | O | -0.51572700 | 2.51088000  | -0.11295600 |
| H  | -2.19096000 | -2.12975200 | -1.87293200 | H | 1.20943200  | -3.52035000 | -2.30425300 |
| C  | -1.95794500 | 0.79916200  | 0.70855500  | H | 0.06536400  | 0.25015800  | 0.21746400  |
| H  | -3.71736100 | -0.12885900 | -1.93175200 | H | -1.77018500 | -2.12161900 | 0.53554300  |
| H  | -2.62036200 | 0.52512500  | 1.53509900  | O | -3.93932500 | -1.12577700 | -0.13695600 |
| O  | -2.72779700 | 0.86739400  | -0.50987500 | C | -5.26257000 | -0.77647300 | 0.06060400  |
| C  | 3.30492100  | 2.59434300  | 1.92764800  | C | -5.80641400 | 0.45800400  | -0.29631800 |
| C  | 2.25061600  | 2.43201200  | 0.84223100  | C | -6.05591600 | -1.74955500 | 0.67187300  |
| C  | 2.89556900  | 2.46914900  | -0.55382700 | C | -7.16055000 | 0.69912400  | -0.05349200 |
| C  | 0.30948500  | 3.63937000  | 0.04898000  | H | -5.18696400 | 1.23122400  | -0.73176100 |
| C  | 1.87140200  | 2.71086300  | -1.66331200 | C | -7.39959600 | -1.49005400 | 0.91586200  |
| H  | 3.63978500  | 3.26816300  | -0.59961400 | H | -5.60684600 | -2.69863300 | 0.94270600  |
| C  | 0.94224900  | 3.87676400  | -1.32558400 | C | -7.96145300 | -0.26533200 | 0.55042300  |
| H  | -0.26314900 | 4.51553900  | 0.36755000  | H | -7.58273100 | 1.65910200  | -0.33307500 |
| H  | 1.26419600  | 1.80627900  | -1.79077100 | H | -8.01162000 | -2.25077400 | 1.38959600  |
| O  | 1.28377900  | 3.47027100  | 1.06087100  | H | -9.01079800 | -0.06606600 | 0.73917700  |
| O  | 3.61833300  | 1.25701800  | -0.79241500 | H | 0.13784200  | 3.92392900  | -2.06945200 |
| H  | 3.06168200  | 0.49442400  | -0.55327100 | O | 0.00793700  | -2.35858200 | -0.34370400 |
| O  | 2.51483300  | 3.03729000  | -2.89282700 | H | 1.76298800  | 1.45908700  | 0.96896300  |
| H  | 3.19943900  | 2.37772100  | -3.06527600 |   |             |             |             |
| O  | 1.64749500  | 5.10511800  | -1.27652900 |   |             |             |             |
| H  | 2.16278200  | 5.17265500  | -2.09191500 |   |             |             |             |
| O  | -0.52236000 | -0.51109500 | 2.04861700  |   |             |             |             |
| H  | 0.43617500  | -0.52886500 | 2.23661400  |   |             |             |             |
| O  | -1.14887500 | -0.45573700 | -2.34259300 |   |             |             |             |
| H  | -1.20884900 | 0.48383800  | -2.11201600 |   |             |             |             |
| O  | 2.93295000  | -2.49151400 | -2.49343900 |   |             |             |             |
| H  | 3.41658200  | -1.79214700 | -2.03310900 |   |             |             |             |
| O  | 3.28172300  | -4.97010600 | -1.25699700 |   |             |             |             |
| H  | 3.75460700  | -4.54195500 | -1.98634100 |   |             |             |             |
| O  | 3.71145600  | -4.14782000 | 1.47489100  |   |             |             |             |
| H  | 4.04543600  | -4.94722600 | 1.04451100  |   |             |             |             |



|    |             |             |             |   |             |             |             |
|----|-------------|-------------|-------------|---|-------------|-------------|-------------|
| K2 |             |             |             | H | 0.92493000  | -0.96599100 | -1.60532400 |
| C  | 2.48333700  | -3.91162100 | -0.71778400 | C | 3.08926300  | -1.39741000 | 2.19122700  |
| C  | 1.88889900  | -2.88618400 | -1.68625600 | H | 3.59067400  | -2.09062800 | 2.87297400  |
| C  | 1.13840900  | -1.78837500 | -0.92666100 | C | -1.39176900 | 2.18964200  | 0.96302300  |
| C  | 2.40359700  | -2.17806600 | 1.08544800  | O | 2.09194200  | -0.65436800 | 2.89049000  |
| C  | 3.27436300  | -3.24437700 | 0.41069100  | H | 2.41675900  | 0.22787900  | 3.15174100  |
| H  | 1.65708200  | -4.48565900 | -0.27299100 | H | 3.84712200  | -0.73462200 | 1.75935200  |
| H  | 1.51597900  | -2.66153700 | 1.51611000  | H | 3.66639600  | 3.50493600  | 2.06061400  |
| H  | 4.17427300  | -2.78252400 | -0.00085600 | H | 4.18623000  | 1.83359200  | 1.77655100  |
| O  | 1.97170100  | -1.22961300 | 0.09392200  | O | 2.80160600  | 2.02702800  | 3.24313300  |
| C  | -1.17256800 | -1.50021100 | -0.12387600 | H | 2.06901200  | 2.60390700  | 3.49370900  |
| C  | -1.93987200 | -1.15430500 | -1.40710700 | H | -0.87924800 | 2.20088900  | 1.92837400  |
| C  | -0.82773700 | -0.25086600 | 0.69839900  | H | -2.19117200 | 2.93918300  | 0.97033100  |
| C  | -3.17450200 | -0.32714000 | -1.03894800 | O | -0.47611300 | 2.47198000  | -0.09986200 |
| H  | -2.23336000 | -2.07407300 | -1.91564300 | H | 1.18670200  | -3.38845400 | -2.36139200 |
| C  | -1.96886700 | 0.80297300  | 0.72348400  | H | 0.04649900  | 0.22224300  | 0.25483300  |
| H  | -3.73643500 | -0.05598600 | -1.93641300 | H | -1.81818800 | -2.13235000 | 0.48728400  |
| H  | -2.63598900 | 0.54529400  | 1.55148900  | O | -3.97670000 | -1.08793800 | -0.16367700 |
| O  | -2.74164700 | 0.89875100  | -0.49142500 | C | -5.29639100 | -0.72781000 | 0.03270900  |
| C  | 3.32504900  | 2.46766500  | 1.98341400  | C | -5.82216400 | 0.52256400  | -0.29567200 |
| C  | 2.31253000  | 2.35038300  | 0.85526500  | C | -6.10758000 | -1.70615000 | 0.61173200  |
| C  | 2.99608400  | 2.47098700  | -0.51543800 | C | -7.17501700 | 0.77462100  | -0.05726500 |
| C  | 0.37484700  | 3.58024900  | 0.07095600  | H | -5.18906200 | 1.29870700  | -0.70553500 |
| C  | 1.97866400  | 2.68716100  | -1.63502100 | C | -7.44987500 | -1.43595100 | 0.85191600  |
| H  | 3.68421100  | 3.31992400  | -0.51107200 | H | -5.67291500 | -2.66788100 | 0.86067200  |
| C  | 1.01444200  | 3.82607900  | -1.29939300 | C | -7.99323700 | -0.19495200 | 0.51453400  |
| H  | -0.18135400 | 4.46517600  | 0.39477200  | H | -7.58262600 | 1.74702900  | -0.31472600 |
| H  | 1.39878300  | 1.76541600  | -1.77494300 | H | -8.07547900 | -2.20104700 | 1.30029700  |
| O  | 1.33843600  | 3.38206300  | 1.08828700  | H | -9.04155000 | 0.01275900  | 0.70001900  |
| O  | 3.81175300  | 1.32982100  | -0.78287900 | H | 0.21433200  | 3.85406400  | -2.04881000 |
| H  | 3.28344600  | 0.51619900  | -0.71970400 | O | -0.03574300 | -2.35013300 | -0.39550100 |
| O  | 2.62678100  | 3.03855800  | -2.85407200 | H | 1.82421800  | 1.37150900  | 0.91663500  |
| H  | 3.34878400  | 2.41342900  | -3.00374000 |   |             |             |             |
| O  | 1.68780500  | 5.07258200  | -1.24663300 |   |             |             |             |
| H  | 2.22398600  | 5.14079300  | -2.04864100 |   |             |             |             |
| O  | -0.58012000 | -0.57256200 | 2.05547800  |   |             |             |             |
| H  | 0.37524300  | -0.60867800 | 2.25448900  |   |             |             |             |
| O  | -1.17178600 | -0.40519800 | -2.34828800 |   |             |             |             |
| H  | -1.20247100 | 0.52849200  | -2.08954000 |   |             |             |             |
| O  | 2.91367800  | -2.23856400 | -2.42661800 |   |             |             |             |
| H  | 3.50400100  | -2.92717000 | -2.76244000 |   |             |             |             |
| O  | 3.31376000  | -4.77574600 | -1.48942400 |   |             |             |             |
| H  | 3.87581800  | -5.27750800 | -0.88390100 |   |             |             |             |
| O  | 3.75680800  | -4.23554000 | 1.32491800  |   |             |             |             |
| H  | 3.00865300  | -4.63972100 | 1.78636000  |   |             |             |             |

|    |             |             |             |   |             |             |             |
|----|-------------|-------------|-------------|---|-------------|-------------|-------------|
| L1 |             |             |             | H | 2.75282100  | -0.49428100 | 1.65181900  |
| C  | 5.85471900  | 0.69632100  | 0.63742400  | C | 4.77141700  | -2.02941400 | -1.91562300 |
| C  | 4.74791000  | 0.36977900  | 1.65011200  | H | 5.33827400  | -1.77541600 | -2.80965800 |
| C  | 3.46857900  | -0.08951300 | 0.93887300  | C | -1.02198300 | -1.29166400 | -1.69692600 |
| C  | 4.71291200  | -0.83182800 | -0.98109500 | O | 3.45320100  | -2.40066100 | -2.34730500 |
| C  | 6.05524300  | -0.45191700 | -0.36005200 | H | 3.04105300  | -2.89519600 | -1.62898800 |
| H  | 5.58054100  | 1.59373500  | 0.07765500  | H | 5.25710200  | -2.88203800 | -1.42765200 |
| H  | 4.31480100  | 0.02769300  | -1.52717400 | H | -1.08688800 | -2.60585700 | 2.06692100  |
| H  | 6.45835500  | -1.32595400 | 0.17647500  | H | -2.58251800 | -2.96468600 | 2.94615900  |
| O  | 3.79330400  | -1.18444300 | 0.07329400  | O | -1.83342300 | -1.02551600 | 3.09815400  |
| C  | 1.56036800  | 1.08498700  | -0.10647500 | H | -2.69434200 | -0.63135400 | 3.30224700  |
| C  | 0.65291100  | 1.28784000  | 1.11381700  | H | -0.65117300 | -2.05426400 | -1.00849700 |
| C  | 1.04869000  | -0.07398600 | -0.97743700 | H | -0.66784600 | -1.52317900 | -2.70519900 |
| C  | -0.76155100 | 1.58350300  | 0.60571700  | O | -2.45565300 | -1.30764200 | -1.67507200 |
| H  | 1.01040700  | 2.14725900  | 1.69301500  | H | 4.53627100  | 1.24666900  | 2.26322800  |
| C  | -0.46950200 | 0.07508100  | -1.27076000 | H | 1.21478900  | -1.01133400 | -0.43991400 |
| H  | -1.46149300 | 1.68205700  | 1.44181700  | H | 1.51410900  | 1.99600800  | -0.70476300 |
| H  | -0.58527200 | 0.80543300  | -2.07760300 | O | -0.70651200 | 2.80055900  | -0.11256000 |
| O  | -1.24861800 | 0.50593900  | -0.14567800 | C | -1.86588400 | 3.52526800  | -0.31062400 |
| C  | -2.06844600 | -2.21371700 | 2.33427700  | C | -3.14868500 | 2.98234700  | -0.22750600 |
| C  | -2.84068600 | -1.88468300 | 1.05990300  | C | -1.68875300 | 4.87400100  | -0.62687600 |
| C  | -4.34958600 | -1.76785700 | 1.23509600  | C | -4.25288300 | 3.80884200  | -0.44537100 |
| C  | -3.02020600 | -2.51234200 | -1.23369500 | H | -3.28960800 | 1.92885800  | -0.02464600 |
| C  | -4.99548900 | -1.39489700 | -0.10392700 | C | -2.79792000 | 5.68182900  | -0.85077500 |
| H  | -4.75448900 | -2.72997400 | 1.58468400  | H | -0.68138100 | 5.27072500  | -0.68794200 |
| C  | -4.54576800 | -2.34858300 | -1.22467900 | C | -4.08736500 | 5.15514200  | -0.75683000 |
| H  | -2.73114000 | -3.35268000 | -1.87557600 | H | -5.24964700 | 3.38409700  | -0.38119500 |
| H  | -4.69237800 | -0.37684000 | -0.35945500 | H | -2.65347100 | 6.72945200  | -1.09461700 |
| O  | -2.57757500 | -2.89956800 | 0.06789600  | H | -4.95144600 | 5.78757200  | -0.92979200 |
| O  | -4.59419500 | -0.77053600 | 2.22862800  | H | -4.88715600 | -1.97000900 | -2.18894700 |
| H  | -5.54246600 | -0.58385300 | 2.24595400  | O | 2.95561600  | 1.01238800  | 0.23977000  |
| O  | -6.41364900 | -1.37086300 | 0.01709700  | H | -2.45552300 | -0.93357900 | 0.69785700  |
| H  | -6.73322900 | -2.27166900 | -0.14267200 |   |             |             |             |
| O  | -5.17570500 | -3.62349100 | -1.06143200 |   |             |             |             |
| H  | -4.66712400 | -4.14414500 | -0.42409700 |   |             |             |             |
| O  | 1.69275800  | -0.09904600 | -2.24166200 |   |             |             |             |
| H  | 2.28714300  | -0.86564600 | -2.31718300 |   |             |             |             |
| O  | 0.65292700  | 0.11086900  | 1.91578000  |   |             |             |             |
| H  | -0.19049900 | -0.02695600 | 2.38367300  |   |             |             |             |
| O  | 5.20274500  | -0.63918400 | 2.55933800  |   |             |             |             |
| H  | 5.05559900  | -1.50727900 | 2.15949300  |   |             |             |             |
| O  | 7.08381200  | 0.99521600  | 1.29270600  |   |             |             |             |
| H  | 7.16142100  | 0.39258700  | 2.04753400  |   |             |             |             |
| O  | 6.94911000  | -0.08143300 | -1.39837600 |   |             |             |             |
| H  | 7.71300100  | 0.34609700  | -0.98701200 |   |             |             |             |

|    |             |             |             |   |             |             |             |
|----|-------------|-------------|-------------|---|-------------|-------------|-------------|
| M1 |             |             |             | H | 2.90363600  | -0.46229200 | 1.66936400  |
| C  | 5.97879900  | 0.69384600  | 0.54304600  | C | 4.81683500  | -2.07745800 | -1.92735800 |
| C  | 4.90191200  | 0.38757900  | 1.59341200  | H | 5.34859600  | -1.83626400 | -2.84611300 |
| C  | 3.60211100  | -0.08016900 | 0.92734600  | C | -1.01213500 | -1.32181400 | -1.44194500 |
| C  | 4.78624200  | -0.86360800 | -1.01256100 | O | 3.48481500  | -2.46242400 | -2.30229400 |
| C  | 6.14692900  | -0.47243700 | -0.43998500 | H | 3.11014100  | -2.96349100 | -1.56850700 |
| H  | 5.69060200  | 1.58234000  | -0.02389600 | H | 5.32514200  | -2.91914000 | -1.44363000 |
| H  | 4.37200100  | -0.01359800 | -1.56160600 | H | -3.07784200 | -2.82126700 | 2.98041200  |
| H  | 6.56660400  | -1.33676500 | 0.09949500  | H | -3.00179000 | -1.07484800 | 3.27544300  |
| O  | 3.89871300  | -1.19549400 | 0.07560400  | O | -1.26902000 | -1.87416200 | 2.57557200  |
| C  | 1.66641700  | 1.07899600  | -0.07446000 | H | -0.99192500 | -2.61095100 | 2.01689700  |
| C  | 0.82969000  | 1.38212400  | 1.17845800  | H | -0.71207400 | -2.05918800 | -0.69268100 |
| C  | 1.10379200  | -0.11741300 | -0.85814400 | H | -0.61177800 | -1.61932200 | -2.41490600 |
| C  | -0.61591400 | 1.62806300  | 0.74809100  | O | -2.44260600 | -1.27779300 | -1.50753400 |
| H  | 1.22801600  | 2.27989500  | 1.65709800  | H | 4.70936800  | 1.27506600  | 2.19740200  |
| C  | -0.42800600 | 0.03330400  | -1.05743900 | H | 1.29729300  | -1.03579500 | -0.29248400 |
| H  | -1.25233700 | 1.78230300  | 1.62361800  | H | 1.60344500  | 1.95111100  | -0.72801000 |
| H  | -0.60006900 | 0.76284600  | -1.85449700 | O | -0.64074200 | 2.76223700  | -0.08752000 |
| O  | -1.11561100 | 0.46287100  | 0.12909400  | C | -1.83058100 | 3.43711300  | -0.29153600 |
| C  | -2.70089800 | -1.86695000 | 2.59129500  | C | -3.08626000 | 2.93575600  | 0.05166600  |
| C  | -3.26443300 | -1.58848400 | 1.20934200  | C | -1.71031600 | 4.69336300  | -0.88970600 |
| C  | -4.78489500 | -1.50034700 | 1.12835500  | C | -4.21912400 | 3.71513900  | -0.19184900 |
| C  | -3.06665200 | -2.43678100 | -1.03335500 | H | -3.19708300 | 1.95012100  | 0.48378200  |
| C  | -5.20192700 | -1.27561300 | -0.33295300 | C | -2.84852000 | 5.45289300  | -1.13456600 |
| H  | -5.22724900 | -2.44082500 | 1.49422200  | H | -0.72285300 | 5.05846200  | -1.14951000 |
| C  | -4.57585600 | -2.31693900 | -1.27136100 | C | -4.11040500 | 4.97001500  | -0.78313000 |
| H  | -2.67943200 | -3.33307800 | -1.53189300 | H | -5.19402700 | 3.32287500  | 0.07901700  |
| H  | -4.86768300 | -0.27874100 | -0.63124600 | H | -2.74771400 | 6.42920600  | -1.59764100 |
| O  | -2.82140200 | -2.67267000 | 0.35318800  | H | -4.99721900 | 5.56516800  | -0.97236900 |
| O  | -5.21896000 | -0.42282000 | 1.94611600  | H | -4.76912800 | -2.04379900 | -2.30945300 |
| H  | -6.15164200 | -0.26229200 | 1.74665000  | O | 3.07432100  | 1.00549900  | 0.21511800  |
| O  | -6.62108900 | -1.26819200 | -0.44413600 | H | -2.82807200 | -0.65955800 | 0.84380100  |
| H  | -6.90886200 | -2.18657800 | -0.55632800 |   |             |             |             |
| O  | -5.20391400 | -3.58963700 | -1.08262300 |   |             |             |             |
| H  | -4.81463500 | -4.01839100 | -0.30781100 |   |             |             |             |
| O  | 1.66853600  | -0.20389400 | -2.15578000 |   |             |             |             |
| H  | 2.29093900  | -0.94882700 | -2.22500000 |   |             |             |             |
| O  | 0.86854400  | 0.34373800  | 2.15409400  |   |             |             |             |
| H  | 0.09158100  | -0.24032400 | 2.10269100  |   |             |             |             |
| O  | 5.38146200  | -0.60649700 | 2.50589200  |   |             |             |             |
| H  | 5.22397500  | -1.48102600 | 2.12454900  |   |             |             |             |
| O  | 7.22742100  | 0.99954500  | 1.15622000  |   |             |             |             |
| H  | 7.32387100  | 0.41237500  | 1.92100700  |   |             |             |             |
| O  | 7.00721300  | -0.12226500 | -1.51311700 |   |             |             |             |
| H  | 7.78591800  | 0.30918400  | -1.13499000 |   |             |             |             |

**Table S4. Cartesian coordinates of optimized configurations for core pentasaccharide**

|    |             |             |             |   |             |             |             |
|----|-------------|-------------|-------------|---|-------------|-------------|-------------|
| A1 |             |             |             | C | 11.15382800 | -0.56803000 | -2.80966400 |
|    |             |             |             | H | 9.53946000  | 0.79897000  | -3.16225400 |
|    |             |             |             | C | 11.61741700 | -1.62257200 | -2.03513300 |
| C  | 0.22057700  | -0.61295200 | 1.91446000  | H | 11.15706000 | -2.94521100 | -0.42551200 |
| C  | 1.64330400  | -0.03943100 | 1.89524300  | H | 11.76346700 | -0.17178900 | -3.60171400 |
| C  | 2.63107600  | -1.15486100 | 2.27124100  | H | 12.58574500 | -2.04944000 | -2.22161300 |
| C  | 1.18429800  | -2.84649500 | 1.40104900  | H | 0.39107900  | -1.48110400 | -0.04624700 |
| C  | 0.16791900  | -1.79931100 | 0.95715400  | N | 6.91310900  | 2.31380500  | -0.18805900 |
| H  | 1.84847800  | 0.28026300  | 0.88045900  | H | 7.57971900  | 2.33569000  | -0.92652200 |
| H  | -0.02063100 | -0.97112500 | 2.90829500  | C | 7.77721700  | 4.53957700  | 0.17753500  |
| H  | 0.91372600  | -3.20228500 | 2.39477500  | H | 7.23009200  | 5.30473800  | -0.36238000 |
| H  | 2.46532300  | -1.43271000 | 3.30732900  | H | 8.15437900  | 4.98327300  | 1.08868800  |
| O  | 2.46577600  | -2.25471000 | 1.44129300  | H | 8.60608600  | 4.20410100  | -0.43284800 |
| O  | -0.73038600 | 0.33067600  | 1.51863700  | N | 1.88221200  | 1.10760500  | 2.75573600  |
| C  | 1.29184800  | -4.04178500 | 0.46817100  | H | 2.74900100  | 1.55012100  | 2.54546100  |
| H  | 0.32757300  | -4.52818100 | 0.40589800  | C | 1.69130600  | 2.90344100  | 4.35544600  |
| H  | 1.99259400  | -4.75259700 | 0.90019200  | H | 1.14342200  | 3.78215700  | 4.03448600  |
| H  | -0.88097100 | 0.88813000  | 2.27891000  | H | 1.54545900  | 2.79660300  | 5.42252000  |
| O  | 1.67090900  | -3.68070600 | -0.82092100 | H | 2.74376100  | 3.04717000  | 4.14667800  |
| H  | 2.59186300  | -3.43783800 | -0.81005500 | C | 1.09391700  | 1.69397000  | 3.66840800  |
| C  | 5.21680100  | 0.85409200  | 1.02957800  | O | -0.02792800 | 1.33255900  | 3.95097200  |
| C  | 6.15703000  | 1.06324400  | -0.16678600 | C | 6.81071500  | 3.43588300  | 0.54769500  |
| C  | 4.62241400  | -0.56027100 | 0.99891200  | O | 6.01365600  | 3.60717500  | 1.44181400  |
| H  | 5.77584100  | 0.95903300  | 1.95471100  | C | -8.44955200 | -1.21122100 | -0.33538800 |
| C  | 7.17665900  | -0.07207900 | -0.22554700 | C | -7.79909100 | -2.53596600 | 0.04774400  |
| H  | 5.55953300  | 1.00554200  | -1.07050600 | C | -6.34131700 | -2.32009300 | 0.44936700  |
| C  | 5.73758900  | -1.60173700 | 0.85835700  | C | -6.70151000 | -0.04186900 | 0.97882000  |
| H  | 3.94197700  | -0.64812600 | 0.16402800  | C | -8.20088700 | -0.14094900 | 0.72157300  |
| H  | 7.83497300  | -0.03013300 | 0.63966700  | H | -8.01994500 | -0.86770000 | -1.27455100 |
| H  | 6.34926700  | -1.56935300 | 1.75913700  | H | -6.21118200 | 0.25241100  | 0.06047400  |
| O  | 6.52877900  | -1.29425700 | -0.27198200 | H | -8.70848100 | -0.42440100 | 1.63446500  |
| O  | 7.90713900  | 0.09178100  | -1.38584300 | O | -6.21624300 | -1.30758900 | 1.38553000  |
| O  | 3.96608800  | -0.77160900 | 2.22746900  | C | -4.26327800 | -2.35244100 | -0.82866400 |
| C  | 5.28050800  | -3.03303000 | 0.63795400  | C | -3.35577200 | -2.07199200 | 0.36581600  |
| H  | 6.15839600  | -3.67295600 | 0.64931800  | C | -3.79074200 | -1.54946900 | -2.03063900 |
| H  | 4.61532300  | -3.33977200 | 1.42513800  | C | -1.94857400 | -2.47847000 | -0.07527100 |
| O  | 4.59224400  | -3.17908400 | -0.57424700 | H | -3.63971400 | -2.67049000 | 1.22474500  |
| H  | 5.16824000  | -2.92630700 | -1.28468600 | C | -2.27915000 | -1.60774600 | -2.26859000 |
| O  | 4.15286200  | 1.75301600  | 1.00210000  | H | -2.06662100 | -2.49649200 | -2.85749300 |
| H  | 4.51394800  | 2.61412600  | 1.20847500  | O | -1.52159900 | -1.63708000 | -1.08360900 |
| C  | 9.11670600  | -0.52304900 | -1.54964300 | C | -5.78361300 | 2.54968400  | -2.30671900 |
| C  | 9.55938600  | -1.58346200 | -0.77814000 | C | -4.36294100 | 2.30983100  | -1.80719000 |
| C  | 9.91068900  | -0.01658400 | -2.56928400 | C | -3.83139600 | 3.44621500  | -0.93472700 |
| C  | 10.81541700 | -2.12170400 | -1.02659100 | C | -2.20616200 | 1.97241600  | -2.79020700 |
| H  | 8.93770400  | -2.00600200 | -0.01450300 | C | -2.36228000 | 3.21513400  | -0.61588800 |

|    |               |              |              |   |              |              |              |
|----|---------------|--------------|--------------|---|--------------|--------------|--------------|
| H  | -3. 92099200  | 4. 37791800  | -1. 47762100 | C | 1. 47131600  | -0. 98963800 | -0. 58389700 |
| C  | -1. 56888700  | 3. 03969400  | -1. 90471000 | C | 2. 61510300  | -0. 00029700 | -0. 80506600 |
| H  | -1. 78092900  | 2. 03493100  | -3. 78273200 | C | 1. 14765800  | 1. 85257200  | -1. 12026800 |
| H  | -2. 25724700  | 2. 31737700  | -0. 01374900 | C | -0. 09081800 | 0. 97445100  | -0. 96197400 |
| O  | -3. 57223400  | 2. 17912700  | -2. 96761600 | H | 1. 27705000  | -1. 04338800 | 0. 48133200  |
| O  | -4. 58432000  | 3. 61406800  | 0. 24434700  | H | 0. 39644700  | -0. 54623800 | -2. 38043200 |
| H  | -4. 56483900  | 2. 82524000  | 0. 79083800  | H | 1. 40452200  | 1. 91282600  | -2. 17642500 |
| O  | -1. 82109200  | 4. 32180900  | 0. 06059200  | H | 2. 87927400  | 0. 02913400  | -1. 86101100 |
| H  | -2. 43493100  | 4. 58742300  | 0. 73470400  | O | 2. 22679400  | 1. 27751100  | -0. 40126100 |
| O  | -1. 54946200  | 4. 23178400  | -2. 63735300 | O | -0. 92867900 | -1. 22494500 | -0. 99582600 |
| H  | -1. 33499300  | 4. 93388400  | -2. 03523800 | C | 0. 99730200  | 3. 26190300  | -0. 56676300 |
| O  | -4. 38537400  | -2. 00975600 | -3. 21529200 | H | 0. 14221800  | 3. 74297500  | -1. 01563400 |
| H  | -5. 32450600  | -1. 90478300 | -3. 13840700 | H | 1. 88389900  | 3. 83306900  | -0. 83691500 |
| O  | -3. 35929300  | -0. 71418600 | 0. 69796800  | H | -0. 70655100 | -2. 07303800 | -0. 60994500 |
| H  | -2. 46889300  | -0. 42398400 | 0. 89827500  | O | 0. 80098500  | 3. 27318400  | 0. 81383600  |
| O  | -8. 44544300  | -3. 10375500 | 1. 14834600  | H | 1. 51537200  | 2. 80774600  | 1. 22849800  |
| H  | -9. 38087900  | -3. 04186300 | 0. 99724300  | C | 5. 57015500  | 1. 17553800  | -0. 25651700 |
| O  | -9. 82279200  | -1. 44925000 | -0. 49646200 | C | 7. 03803100  | 1. 24792600  | -0. 69634300 |
| H  | -10. 26563000 | -0. 60897900 | -0. 51493700 | C | 4. 99857800  | -0. 20078600 | -0. 57569300 |
| O  | -8. 76821400  | 1. 07498500  | 0. 31054200  | H | 5. 49828000  | 1. 33768600  | 0. 81208100  |
| H  | -8. 22351400  | 1. 48698600  | -0. 35630600 | C | 7. 85091500  | 0. 02607800  | -0. 25734200 |
| H  | -5. 96884800  | -3. 21664900 | 0. 92480600  | H | 7. 04556400  | 1. 23343400  | -1. 77890700 |
| C  | -6. 30507200  | 0. 95491900  | 2. 05058400  | C | 5. 89853300  | -1. 27459200 | 0. 02412700  |
| H  | -6. 87266900  | 1. 86700500  | 1. 93594600  | H | 4. 97732700  | -0. 33327000 | -1. 65086300 |
| C  | -1. 82276300  | -0. 37822900 | -3. 03865300 | H | 8. 04646900  | 0. 04487600  | 0. 80559400  |
| O  | -4. 94492600  | 1. 29627600  | 1. 94332300  | H | 5. 98397000  | -1. 12532900 | 1. 09945100  |
| H  | -4. 44055500  | 0. 50417500  | 1. 76789200  | O | 7. 15920300  | -1. 14834900 | -0. 58670100 |
| H  | -6. 51969100  | 0. 53777900  | 3. 02924200  | O | 9. 02650300  | 0. 04608900  | -0. 97441000 |
| H  | -6. 06306800  | 1. 74661900  | -2. 97458200 | O | 3. 70011500  | -0. 38138900 | -0. 05284800 |
| H  | -5. 81696400  | 3. 47754500  | -2. 86991800 | C | 5. 40748500  | -2. 68842000 | -0. 21984300 |
| O  | -6. 72483400  | 2. 56561700  | -1. 26114800 | H | 6. 17340100  | -3. 38564000 | 0. 10332800  |
| H  | -6. 43664500  | 3. 19463400  | -0. 60788500 | H | 4. 51606700  | -2. 86576000 | 0. 36116200  |
| H  | -2. 43435500  | -0. 27674700 | -3. 92733800 | O | 5. 06467900  | -2. 91380000 | -1. 56427400 |
| H  | -0. 78463800  | -0. 49451400 | -3. 33216400 | H | 5. 84440400  | -2. 83512300 | -2. 10021800 |
| O  | -1. 94634300  | 0. 74556600  | -2. 20465300 | O | 4. 90041000  | 2. 18701500  | -0. 95542800 |
| H  | -7. 82818700  | -3. 21309600 | -0. 80127700 | H | 4. 01083800  | 2. 24454500  | -0. 62804900 |
| H  | -4. 07132500  | -0. 52649400 | -1. 84444400 | C | 10. 12630900 | -0. 62326900 | -0. 52878200 |
| H  | -4. 19212900  | -3. 41527500 | -1. 05233200 | C | 10. 08060600 | -1. 69025400 | 0. 35258600  |
| O  | -1. 12356800  | -2. 35251900 | 1. 03581300  | C | 11. 34325400 | -0. 18255300 | -1. 03118400 |
| H  | -0. 55949500  | 2. 72178800  | -1. 66541100 | C | 11. 26598700 | -2. 30066500 | 0. 74040000  |
| O  | -5. 62917000  | -2. 02183700 | -0. 70756100 | H | 9. 14276300  | -2. 05714900 | 0. 71951900  |
| H  | -4. 34011200  | 1. 39464700  | -1. 22776600 | C | 12. 51316600 | -0. 80623700 | -0. 64467600 |
| H  | -1. 93281500  | -3. 51237900 | -0. 41603500 | H | 11. 35067900 | 0. 64524500  | -1. 71566400 |
| A2 |               |              |              | C | 12. 48311600 | -1. 86829500 | 0. 24883100  |
| C  | 0. 21496600   | -0. 48220800 | -1. 30992700 | H | 11. 22645700 | -3. 12674800 | 1. 42787200  |

|   |             |             |             |    |              |             |             |
|---|-------------|-------------|-------------|----|--------------|-------------|-------------|
| H | 13.45212400 | -0.45872800 | -1.03722400 | O  | -4.64896000  | 0.75792600  | 3.46899500  |
| H | 13.39471400 | -2.34996400 | 0.55222300  | O  | -4.68807000  | -2.72629200 | 2.34498900  |
| H | -0.45142300 | 1.03157700  | 0.05150100  | H  | -4.52281200  | -2.60193500 | 1.40842100  |
| N | 7.67114700  | 2.48885300  | -0.30211000 | O  | -2.07872400  | -2.43955200 | 3.50605500  |
| H | 7.83037800  | 3.15476800  | -1.02121200 | H  | -2.41402200  | -3.23811300 | 3.11705800  |
| C | 8.36483300  | 4.29261500  | 1.15858400  | O  | -2.61725800  | -0.39123500 | 5.19164000  |
| H | 7.53947400  | 4.99459300  | 1.08907500  | H  | -2.22944800  | -1.23657000 | 5.38304700  |
| H | 8.80790100  | 4.37693500  | 2.14000900  | O  | -5.52930900  | 3.49972700  | 0.30538400  |
| H | 9.09728500  | 4.55207900  | 0.40285400  | H  | -6.39844200  | 3.14937500  | 0.16167000  |
| N | 1.90726000  | -2.29681100 | -1.06365800 | O  | -3.40726500  | 0.04796400  | -0.89477700 |
| H | 2.81439400  | -2.36140700 | -1.47404000 | H  | -2.53841900  | -0.35276300 | -0.93671300 |
| C | 2.01511700  | -4.72949700 | -1.09697700 | O  | -8.10676200  | 0.21892100  | -4.02833300 |
| H | 2.11196900  | -5.36059700 | -0.22241200 | H  | -9.04888900  | 0.10882500  | -4.07353700 |
| H | 1.37318900  | -5.24580000 | -1.80150100 | O  | -9.92395400  | 0.07773900  | -2.02251800 |
| H | 2.98654400  | -4.57093900 | -1.54376500 | H  | -10.37696500 | -0.53773500 | -1.45816800 |
| C | 1.32561700  | -3.45187600 | -0.68304500 | O  | -8.74292900  | -1.95773000 | -0.40275500 |
| O | 0.28760900  | -3.48031700 | -0.06152900 | H  | -8.39631400  | -1.64649200 | 0.43040000  |
| C | 7.83467200  | 2.88713900  | 0.98110200  | H  | -5.78423800  | 0.94459900  | -3.48071100 |
| O | 7.56673500  | 2.18225000  | 1.91923100  | C  | -5.89862300  | -2.67866600 | -1.11008000 |
| C | -8.56571400 | 0.06908400  | -1.67187600 | H  | -6.47982200  | -3.29646200 | -0.44116600 |
| C | -7.80365300 | 0.77973700  | -2.78546600 | C  | -3.00787800  | 2.89222000  | 1.94613500  |
| C | -6.29709500 | 0.62874600  | -2.58302700 | O  | -4.61409500  | -2.55060200 | -0.55122100 |
| C | -6.55207900 | -1.32029000 | -1.26721300 | H  | -4.19255100  | -1.78566600 | -0.93365600 |
| C | -8.06170900 | -1.35591100 | -1.47188600 | H  | -5.84820900  | -3.17080200 | -2.07610600 |
| H | -8.41897800 | 0.61504200  | -0.74191100 | H  | -7.03292700  | 0.50070500  | 2.68794100  |
| H | -6.33702500 | -0.74879000 | -0.37439600 | H  | -6.76437100  | -0.66581200 | 3.96629700  |
| H | -8.29650600 | -1.93780600 | -2.35374000 | O  | -7.17451000  | -1.41450100 | 2.09124300  |
| O | -5.94353100 | -0.69474200 | -2.38177800 | H  | -6.71433000  | -2.23895300 | 2.20934100  |
| C | -4.67462600 | 2.01847700  | -1.39596100 | H  | -3.85184300  | 3.31677200  | 2.47697700  |
| C | -3.45612800 | 1.16194900  | -1.72899000 | H  | -2.10034000  | 3.41038500  | 2.23379200  |
| C | -4.59559400 | 2.48426500  | 0.04990200  | O  | -2.86802100  | 1.52159700  | 2.23032900  |
| C | -2.24082800 | 2.06630000  | -1.49897700 | H  | -8.05051500  | 1.83767800  | -2.77517700 |
| H | -3.46282700 | 0.86412900  | -2.77381800 | H  | -4.80311000  | 1.62301900  | 0.66175600  |
| C | -3.23511000 | 3.05790900  | 0.45188000  | H  | -4.66148900  | 2.88357400  | -2.05612700 |
| H | -3.23755800 | 4.11707500  | 0.20785400  | O  | -1.06677900  | 1.41669100  | -1.88225100 |
| O | -2.14025600 | 2.43871800  | -0.17848600 | H  | -1.38808800  | 0.12581900  | 3.63597300  |
| C | -6.57222600 | -0.44964600 | 2.91966500  | O  | -5.94372700  | 1.41262800  | -1.48946000 |
| C | -5.06823300 | -0.34131000 | 2.69075600  | H  | -4.88188300  | -0.15437600 | 1.63990800  |
| C | -4.30337600 | -1.60036900 | 3.09871500  | H  | -2.32316200  | 2.94156800  | -2.14141100 |
| C | -3.29092000 | 1.06697200  | 3.46812400  | A3 |              |             |             |
| C | -2.80557100 | -1.35231600 | 2.99728000  | C  | 0.37401300   | -1.13591000 | 1.76533400  |
| H | -4.53991600 | -1.83924800 | 4.12692900  | C  | 1.78543700   | -0.54411100 | 1.87268000  |
| C | -2.42360100 | -0.13451600 | 3.83039700  | C  | 2.80343100   | -1.69406000 | 1.92213000  |
| H | -3.17522300 | 1.82808000  | 4.22756600  | C  | 1.36848400   | -3.13351800 | 0.66652600  |
| H | -2.53888500 | -1.17146700 | 1.95876600  | C  | 0.31997700   | -2.03391300 | 0.53329800  |

|   |             |             |             |   |             |             |             |
|---|-------------|-------------|-------------|---|-------------|-------------|-------------|
| H | 1.96060200  | 0.03739100  | 0.97529900  | H | 7.61118400  | 2.63847700  | -0.31881400 |
| H | 0.16229800  | -1.74702700 | 2.63461500  | C | 7.79017600  | 4.47700600  | 1.32512100  |
| H | 1.13167900  | -3.74436900 | 1.53715500  | H | 7.21941800  | 5.34524800  | 1.01414800  |
| H | 2.66878800  | -2.23960700 | 2.85080400  | H | 8.17665200  | 4.67274200  | 2.31590100  |
| O | 2.63839000  | -2.53966200 | 0.83431100  | H | 8.61311300  | 4.33288800  | 0.63655900  |
| O | -0.60165400 | -0.14301500 | 1.64754700  | N | 2.02244800  | 0.34032700  | 3.00179400  |
| C | 1.47382300  | -4.03833800 | -0.55029800 | H | 2.87753500  | 0.84073800  | 2.90371200  |
| H | 0.51839600  | -4.51758200 | -0.71675800 | C | 1.84880600  | 1.61156900  | 5.04623000  |
| H | 2.20167700  | -4.81785100 | -0.33720500 | H | 1.20119300  | 2.47797000  | 5.10626100  |
| H | -0.75093800 | 0.18516300  | 2.53136200  | H | 1.85862000  | 1.14251000  | 6.02242100  |
| O | 1.80727500  | -3.34007200 | -1.70687400 | H | 2.85151800  | 1.93094600  | 4.79258600  |
| H | 2.72298300  | -3.08320600 | -1.65352100 | C | 1.24888600  | 0.63537800  | 4.05666300  |
| C | 5.31887600  | 0.63629800  | 1.21081900  | O | 0.14054400  | 0.18557600  | 4.25145100  |
| C | 6.22510600  | 1.18009600  | 0.09624700  | C | 6.85058300  | 3.29373900  | 1.40362400  |
| C | 4.75001700  | -0.73294800 | 0.81537400  | O | 6.06705800  | 3.20595800  | 2.32154800  |
| H | 5.89876600  | 0.50478000  | 2.11964300  | C | -8.26078800 | -1.20134500 | -0.43598800 |
| C | 7.26232100  | 0.12599800  | -0.28493000 | C | -7.69125900 | -2.60951000 | -0.30982100 |
| H | 5.60625100  | 1.35291100  | -0.77794900 | C | -6.22619100 | -2.53812800 | 0.11259400  |
| C | 5.87958700  | -1.67171700 | 0.37876800  | C | -6.49523300 | -0.42838100 | 1.16283800  |
| H | 4.04997500  | -0.61148500 | 0.00117400  | C | -7.97874800 | -0.37020900 | 0.81021200  |
| H | 7.94152200  | -0.04960500 | 0.54668000  | H | -7.79357500 | -0.71082000 | -1.28711400 |
| H | 6.51424100  | -1.86607100 | 1.24251000  | H | -5.93261700 | 0.07388000  | 0.38563600  |
| O | 6.63469600  | -1.05409900 | -0.64417400 | H | -8.56471600 | -0.76482200 | 1.62983100  |
| O | 7.96009100  | 0.61143300  | -1.37304700 | O | -6.07205300 | -1.77379600 | 1.25619300  |
| O | 4.12932100  | -1.27960500 | 1.95593700  | C | -4.16343900 | -2.22575000 | -1.20071600 |
| C | 5.44280400  | -3.00297000 | -0.20698500 | C | -3.22231500 | -2.27160800 | 0.00076600  |
| H | 6.33224500  | -3.60040500 | -0.38657700 | C | -3.76805500 | -1.07668300 | -2.11573800 |
| H | 4.80546700  | -3.52553400 | 0.48360200  | C | -1.81871600 | -2.45152200 | -0.58251000 |
| O | 4.72392300  | -2.83693000 | -1.39873700 | H | -3.44697700 | -3.11764900 | 0.64169600  |
| H | 5.27589900  | -2.39082200 | -2.02858300 | C | -2.26616700 | -0.96975600 | -2.40066200 |
| O | 4.23759500  | 1.48315000  | 1.44449100  | H | -2.02518100 | -1.61540400 | -3.24080900 |
| H | 4.58794400  | 2.26857700  | 1.86288700  | O | -1.46842700 | -1.31904000 | -1.29335200 |
| C | 9.17547700  | 0.09117700  | -1.71995200 | C | -5.38016800 | 3.67583300  | -3.21204700 |
| C | 9.65615700  | -1.12599200 | -1.26935100 | C | -4.58238500 | 2.88237700  | -2.18963400 |
| C | 9.93390700  | 0.87008500  | -2.58287200 | C | -4.87530100 | 3.29502900  | -0.75030900 |
| C | 10.91444500 | -1.54863600 | -1.67820200 | C | -2.24575400 | 2.61170200  | -1.65986500 |
| H | 9.06188200  | -1.75161500 | -0.63405000 | C | -3.87367100 | 2.67387400  | 0.20820000  |
| C | 11.17974100 | 0.43226800  | -2.98720200 | H | -4.81772500 | 4.37281900  | -0.67897800 |
| H | 9.53344300  | 1.80538300  | -2.92841100 | C | -2.45567700 | 3.04083600  | -0.21210600 |
| C | 11.68132900 | -0.77958800 | -2.53256000 | H | -1.30854800 | 2.99193000  | -2.04622500 |
| H | 11.28570200 | -2.49444400 | -1.32636800 | H | -3.97624500 | 1.59912400  | 0.18221900  |
| H | 11.76175900 | 1.03984400  | -3.65660700 | O | -3.22333300 | 3.12293300  | -2.50977100 |
| H | 12.65172800 | -1.11823600 | -2.84606000 | O | -6.18461100 | 2.87028900  | -0.42608700 |
| H | 0.50982900  | -1.46084300 | -0.35753400 | H | -6.37614400 | 3.21720400  | 0.43676300  |
| N | 6.95995200  | 2.40717200  | 0.39715500  | O | -4.14572200 | 3.14617400  | 1.50588200  |

|    |              |             |             |   |              |             |             |
|----|--------------|-------------|-------------|---|--------------|-------------|-------------|
| H  | -4.22998200  | 2.39471400  | 2.08787300  | O | -2.60848200  | -1.77304400 | 0.65011700  |
| O  | -2.24292600  | 4.42171900  | -0.12698000 | O | 0.76768200   | 0.41843200  | -0.34166600 |
| H  | -2.53012100  | 4.70358600  | 0.73318000  | C | -1.46836100  | -3.75822900 | 1.18654600  |
| O  | -4.39905100  | -1.17229300 | -3.36553100 | H | -0.61060400  | -4.37249300 | 0.95467100  |
| H  | -5.33644800  | -1.19471200 | -3.22435800 | H | -2.36422400  | -4.33223800 | 0.96076700  |
| O  | -3.26675600  | -1.08552100 | 0.73775400  | H | 0.89814500   | 0.87272600  | 0.48399200  |
| H  | -2.37900000  | -0.77550300 | 0.91634900  | O | -1.39788600  | -3.44982100 | 2.54691700  |
| O  | -8.37274700  | -3.33685200 | 0.66758800  | H | -2.14392700  | -2.91143700 | 2.77772400  |
| H  | -9.30338000  | -3.22076000 | 0.51939900  | C | -5.95255500  | -1.36682400 | 0.22917000  |
| O  | -9.64139000  | -1.32514300 | -0.65373300 | C | -7.32865100  | -1.39082000 | -0.44633500 |
| H  | -10.03964400 | -0.47077000 | -0.53790900 | C | -5.17700700  | -0.13509700 | -0.21935100 |
| O  | -8.42054200  | 0.95061500  | 0.61049000  | H | -6.07230300  | -1.32461400 | 1.30494700  |
| H  | -7.83618500  | 1.40115300  | 0.00800900  | C | -8.04578300  | -0.03887000 | -0.36781000 |
| H  | -5.86764200  | -3.52685100 | 0.36256100  | H | -7.16311200  | -1.57678800 | -1.50003300 |
| C  | -6.16583000  | 0.23055200  | 2.49031700  | C | -6.01749200  | 1.11294400  | 0.01816700  |
| H  | -6.68542200  | 1.17517600  | 2.56802400  | H | -4.97540900  | -0.21115100 | -1.28092400 |
| C  | -1.90953300  | 0.47195400  | -2.73852300 | H | -8.40198300  | 0.15858900  | 0.63367600  |
| O  | -4.79372000  | 0.50177900  | 2.61132900  | H | -6.28334200  | 1.18397800  | 1.07194400  |
| H  | -4.30072200  | -0.22664200 | 2.24108400  | O | -7.17757100  | 0.98621300  | -0.76834200 |
| H  | -6.50259500  | -0.41315800 | 3.29711500  | O | -9.09314800  | -0.08683800 | -1.26129600 |
| H  | -6.43722100  | 3.56963900  | -3.01326200 | O | -3.96338900  | 0.00856400  | 0.48386500  |
| H  | -5.17346300  | 3.27077300  | -4.20014500 | C | -5.32320200  | 2.40111200  | -0.38098900 |
| O  | -5.08351000  | 5.03985200  | -3.16151200 | H | -6.03498900  | 3.21736900  | -0.31143300 |
| H  | -4.14038800  | 5.13547900  | -3.20971400 | H | -4.51071500  | 2.59535300  | 0.30091200  |
| H  | -2.46082700  | 0.78885000  | -3.61551100 | O | -4.76301200  | 2.33818800  | -1.66818900 |
| H  | -0.84507100  | 0.55382700  | -2.93614400 | H | -5.46096800  | 2.25056900  | -2.30553200 |
| O  | -2.25609800  | 1.23095200  | -1.61468500 | O | -5.30112900  | -2.54779500 | -0.14782000 |
| H  | -7.75240800  | -3.11098700 | -1.27148700 | H | -4.47936500  | -2.60771300 | 0.32512900  |
| H  | -4.08082900  | -0.18281300 | -1.60396900 | C | -10.15842300 | 0.75222500  | -1.13200800 |
| H  | -4.06940600  | -3.17225100 | -1.72923300 | C | -10.11836700 | 1.95771400  | -0.45176900 |
| O  | -0.95564600  | -2.62637500 | 0.49110700  | C | -11.32942700 | 0.33778800  | -1.75228300 |
| H  | -1.74059500  | 2.50321100  | 0.40193000  | C | -11.26623700 | 2.73600500  | -0.38305700 |
| O  | -5.53633200  | -1.99364800 | -0.96451500 | H | -9.20948400  | 2.30012900  | 0.00146300  |
| H  | -4.81082200  | 1.82825600  | -2.30937600 | C | -12.46033600 | 1.12741300  | -1.68441300 |
| H  | -1.77419600  | -3.32795300 | -1.22682100 | H | -11.33293300 | -0.60000900 | -2.27608300 |
| A4 |              |             |             | C | -12.43800900 | 2.33172100  | -0.99425200 |
| C  | -0.37887700  | -0.37011700 | -0.31247300 | H | -11.23174400 | 3.66999400  | 0.14900700  |
| C  | -1.63139200  | 0.36733700  | 0.17784200  | H | -13.36387000 | 0.79937200  | -2.16664900 |
| C  | -2.82596700  | -0.56241500 | -0.02935100 | H | -13.32000700 | 2.94333700  | -0.93858300 |
| C  | -1.44753600  | -2.51680500 | 0.31219500  | H | -0.16717200  | -1.38044500 | 1.57866400  |
| C  | -0.22216400  | -1.63337000 | 0.53255000  | N | -8.16195300  | -2.47443100 | 0.03117600  |
| H  | -1.54649000  | 0.55470700  | 1.24089200  | H | -8.29448900  | -3.23942700 | -0.58771500 |
| H  | -0.52719500  | -0.66986800 | -1.34547800 | C | -9.29602000  | -3.90749500 | 1.62041600  |
| H  | -1.49531700  | -2.82049300 | -0.73199600 | H | -8.56430100  | -4.68796900 | 1.80558400  |
| H  | -2.95469400  | -0.77439600 | -1.08872900 | H | -9.88952700  | -3.77155400 | 2.51253400  |



|   |             |             |             |    |             |             |             |
|---|-------------|-------------|-------------|----|-------------|-------------|-------------|
| H | -9.93258100 | -4.22482200 | 0.80242600  | H  | 6.32379500  | -1.42142100 | 2.39368000  |
| N | -1.83012300 | 1.63497500  | -0.48251900 | O  | 3.24292200  | -1.09055300 | -0.79319300 |
| H | -2.54121300 | 1.72748600  | -1.17509300 | H  | 2.43463100  | -0.60396600 | -0.63307400 |
| C | -1.51939000 | 4.02693100  | -0.77365300 | O  | 7.83403600  | -3.97331100 | -2.09004900 |
| H | -1.55337500 | 4.84349100  | -0.06547500 | H  | 8.77541400  | -3.98559600 | -2.21362800 |
| H | -0.70501100 | 4.21885000  | -1.46448600 | O  | 9.67590600  | -2.16420200 | -1.23449400 |
| H | -2.44520500 | 3.97986300  | -1.33266200 | H  | 10.13447400 | -1.36885300 | -1.47764400 |
| C | -1.21419400 | 2.74958100  | -0.02688800 | O  | 8.44979100  | 0.27158800  | -2.15199400 |
| O | -0.44638600 | 2.72556300  | 0.90348300  | H  | 8.13497200  | 0.77470000  | -1.40701200 |
| C | -8.57342900 | -2.61456700 | 1.31260300  | H  | 5.51885700  | -3.83649500 | -1.08402300 |
| O | -8.37081900 | -1.78005700 | 2.15601500  | C  | 5.68648400  | -0.12592800 | -3.30920100 |
| C | 8.31934300  | -1.85595500 | -1.05486100 | H  | 6.28474000  | 0.73960800  | -3.55634400 |
| C | 7.55955100  | -3.17473600 | -0.97870200 | C  | 3.08162200  | 0.60377800  | 2.87477400  |
| C | 6.05740500  | -2.90585800 | -0.97256800 | O  | 4.38514200  | 0.33275300  | -3.04899300 |
| C | 6.28718900  | -0.83753200 | -2.11007000 | H  | 3.91848800  | -0.32631300 | -2.54078900 |
| C | 7.80496500  | -0.97812900 | -2.18987300 | H  | 5.69300300  | -0.80108500 | -4.15949400 |
| H | 8.18149000  | -1.31929600 | -0.11860900 | H  | 7.87217800  | 2.97296900  | 1.91186800  |
| H | 6.03612100  | -0.27408200 | -1.22021500 | H  | 6.92598500  | 2.82272800  | 3.38724500  |
| H | 8.08076200  | -1.43298000 | -3.13213300 | O  | 6.83267600  | 4.61680300  | 2.39231200  |
| O | 5.68443600  | -2.11506900 | -2.04487100 | H  | 5.96070300  | 4.84765000  | 2.68802700  |
| C | 4.50682300  | -2.33766900 | 0.85604500  | H  | 3.90636000  | 0.87219800  | 3.52168800  |
| C | 3.27044500  | -2.26642400 | -0.03917800 | H  | 2.14699900  | 0.78730500  | 3.39586600  |
| C | 4.51940000  | -1.13699000 | 1.78969600  | O  | 3.11738900  | 1.33305900  | 1.67595700  |
| C | 2.07406500  | -2.29755500 | 0.91259800  | H  | 7.82482500  | -3.69183100 | -0.06099700 |
| H | 3.21416200  | -3.12477200 | -0.69932000 | H  | 4.74997700  | -0.29083500 | 1.16522500  |
| C | 3.18932100  | -0.86939200 | 2.49877300  | H  | 4.44927700  | -3.25948900 | 1.43152300  |
| H | 3.14863900  | -1.47874800 | 3.39726400  | O  | 0.92554300  | -2.33339700 | 0.12957700  |
| O | 2.06713200  | -1.14832200 | 1.68974500  | H  | 2.34701300  | 2.77969700  | -0.16277300 |
| C | 6.92897500  | 3.22397800  | 2.37631100  | O  | 5.77573800  | -2.28727900 | 0.24131200  |
| C | 5.78890100  | 2.58373400  | 1.60033500  | H  | 5.88947600  | 1.50531000  | 1.66108300  |
| C | 5.75749200  | 2.99927300  | 0.13288900  | H  | 2.10325600  | -3.17839700 | 1.55056300  |
| C | 3.37204200  | 2.70097600  | 1.70372200  | A5 |             |             |             |
| C | 4.45678900  | 2.57085200  | -0.52340000 | C  | -0.58603900 | 3.32076000  | -1.00739000 |
| H | 5.85039600  | 4.07488600  | 0.07335800  | C  | -1.95613500 | 3.00666700  | -0.39566500 |
| C | 3.27838600  | 3.14902200  | 0.24940200  | C  | -2.94200100 | 2.71363600  | -1.53165400 |
| H | 2.64605800  | 3.21990900  | 2.31426000  | C  | -1.20460000 | 1.86045600  | -2.92952300 |
| H | 4.38995800  | 1.49270900  | -0.51137700 | C  | -0.12578500 | 2.15234500  | -1.88039000 |
| O | 4.60834800  | 2.99825100  | 2.26717200  | H  | -1.84821600 | 2.11024500  | 0.20393300  |
| O | 6.85527100  | 2.39511800  | -0.52251800 | H  | -0.65802800 | 4.19342000  | -1.64367000 |
| H | 6.86186300  | 2.73898300  | -1.40766600 | H  | -1.25606700 | 2.72193100  | -3.59481400 |
| O | 4.45486600  | 3.03001300  | -1.85380000 | H  | -3.06970800 | 3.61141700  | -2.12914500 |
| H | 4.26178600  | 2.29152000  | -2.42588600 | O  | -2.46076100 | 1.67335200  | -2.30828700 |
| O | 3.30214600  | 4.54842100  | 0.22854400  | O  | 0.36298000  | 3.55703400  | -0.00828600 |
| H | 3.38256800  | 4.82177800  | -0.67710200 | C  | -0.97129700 | 0.61366800  | -3.77049500 |
| O | 5.47972400  | -1.27723300 | 2.80134600  | H  | 0.00422100  | 0.66905000  | -4.22623300 |

|   |              |             |             |   |             |             |             |
|---|--------------|-------------|-------------|---|-------------|-------------|-------------|
| H | -1.71641100  | 0.60395500  | -4.56412300 | H | -2.33052900 | 6.44820100  | 2.47335200  |
| H | 0.26109500   | 4.46740800  | 0.25825200  | H | -3.37819400 | 6.92233800  | 1.15645000  |
| O | -1.02754200  | -0.55779300 | -3.02226700 | H | -3.77105600 | 5.48934600  | 2.11099600  |
| H | -1.93213300  | -0.72090000 | -2.77592800 | C | -2.10316700 | 5.28760800  | 0.71153200  |
| C | -5.17162500  | 1.42523500  | 0.84092400  | O | -1.13059200 | 5.81458900  | 0.21317300  |
| C | -5.74682000  | 0.13660000  | 1.44576500  | C | -5.92659900 | 0.47839600  | 3.87904300  |
| C | -4.51717000  | 1.15234100  | -0.51807100 | O | -4.74133500 | 0.66351600  | 4.00852600  |
| H | -5.99492900  | 2.11710400  | 0.67690800  | C | 7.21950700  | 2.12500500  | 1.73909300  |
| C | -6.66407900  | -0.52181700 | 0.41914600  | C | 5.70975000  | 1.97475100  | 1.86657700  |
| H | -4.94060600  | -0.55724600 | 1.65649300  | C | 5.17507000  | 1.02407200  | 0.80302600  |
| C | -5.49843100  | 0.40277000  | -1.42394300 | C | 7.26855200  | -0.11061100 | 0.61781600  |
| H | -3.62473500  | 0.55831800  | -0.38216600 | C | 7.89559900  | 0.76072400  | 1.70315500  |
| H | -7.52179900  | 0.11907400  | 0.21394700  | H | 7.44163800  | 2.65171800  | 0.81288800  |
| H | -6.33444200  | 1.06569200  | -1.64371100 | H | 7.45860000  | 0.33347600  | -0.35603800 |
| O | -5.96717700  | -0.75267200 | -0.75327300 | H | 7.76788100  | 0.28423500  | 2.66520100  |
| O | -7.08956400  | -1.72191900 | 0.94351600  | O | 5.87471300  | -0.19203200 | 0.82668500  |
| O | -4.22772900  | 2.39736000  | -1.11071900 | C | 4.39962000  | 1.37591200  | -1.47999800 |
| C | -4.92773800  | -0.10451600 | -2.73610800 | C | 3.10340400  | 2.17007700  | -1.32320500 |
| H | -5.74035500  | -0.53067100 | -3.31815200 | C | 4.13555000  | -0.11608800 | -1.68291100 |
| H | -4.49187600  | 0.70833100  | -3.29007800 | C | 2.21636500  | 1.84671700  | -2.52576800 |
| O | -3.92313800  | -1.05868300 | -2.53468300 | H | 3.33729400  | 3.23178600  | -1.33884300 |
| H | -4.28632000  | -1.79418500 | -2.05777700 | C | 3.02908200  | -0.36007500 | -2.71908600 |
| O | -4.23606300  | 2.04332300  | 1.67430900  | H | 3.46043000  | -0.20854400 | -3.70789500 |
| H | -4.18121100  | 1.60986600  | 2.52460600  | O | 1.92883100  | 0.49471100  | -2.55484700 |
| C | -8.18383000  | -2.36316600 | 0.43452100  | C | 4.97480500  | -4.90308400 | -0.27976400 |
| C | -8.74017800  | -2.09074500 | -0.80319500 | C | 3.94773700  | -3.78544900 | -0.13325400 |
| C | -8.73332400  | -3.34100600 | 1.25258400  | C | 3.47397200  | -3.61280200 | 1.31378100  |
| C | -9.86562600  | -2.79731200 | -1.20816300 | C | 1.76618800  | -3.30846600 | -0.95589300 |
| H | -8.29908200  | -1.36614300 | -1.45785600 | C | 2.23293400  | -2.73615400 | 1.41829400  |
| C | -9.84678900  | -4.04096800 | 0.83195600  | H | 3.22656600  | -4.58396300 | 1.72114400  |
| H | -8.27485600  | -3.53980100 | 2.20358500  | C | 1.16289800  | -3.20297900 | 0.43869200  |
| C | -10.42455600 | -3.76942500 | -0.40099700 | H | 1.06192800  | -3.75797200 | -1.64314900 |
| H | -10.29568500 | -2.58437400 | -2.17040600 | H | 2.49243400  | -1.70778900 | 1.18642000  |
| H | -10.26660300 | -4.79853700 | 1.46903200  | O | 2.87818800  | -4.14945000 | -0.96860300 |
| H | -11.29213400 | -4.31362900 | -0.72633900 | O | 4.50928100  | -3.10903400 | 2.13763100  |
| H | 0.06342800   | 1.27160500  | -1.28623000 | H | 4.78526600  | -2.24914500 | 1.83152900  |
| N | -6.51207800  | 0.37217900  | 2.66375300  | O | 1.68146800  | -2.81589700 | 2.70781900  |
| H | -7.45378400  | 0.04941700  | 2.65666700  | H | 2.36375600  | -2.64170900 | 3.34407900  |
| C | -6.84324400  | 0.33912800  | 5.07045700  | O | 0.67754300  | -4.46444200 | 0.79606700  |
| H | -6.89066100  | -0.70803700 | 5.35257100  | H | 0.45236100  | -4.43581300 | 1.71769800  |
| H | -6.42967700  | 0.89650100  | 5.89813900  | O | 5.26646700  | -0.76814500 | -2.18355100 |
| H | -7.84834000  | 0.68469500  | 4.86034400  | H | 5.82111200  | -1.11242400 | -1.49086300 |
| N | -2.50630400  | 4.03222100  | 0.47670000  | O | 2.50358900  | 1.81373500  | -0.11778500 |
| H | -3.27255700  | 3.68983000  | 1.01475700  | H | 1.80858800  | 2.43475700  | 0.08683800  |
| C | -2.96447200  | 6.06927600  | 1.68136800  | O | 5.37942900  | 1.42467100  | 3.11031500  |

|    |             |             |             |   |              |             |             |
|----|-------------|-------------|-------------|---|--------------|-------------|-------------|
| H  | 5.82398600  | 1.93161600  | 3.77845000  | C | -5.60426800  | -0.78748200 | -0.69483100 |
| O  | 7.66459400  | 2.87401900  | 2.83949900  | C | -7.09406700  | -0.90294100 | -1.04197500 |
| H  | 8.60776400  | 2.78726800  | 2.90300000  | C | -5.28476700  | 0.62963900  | -0.23396600 |
| O  | 9.28707200  | 0.91254400  | 1.53518400  | H | -5.35964400  | -1.47251600 | 0.10801000  |
| H  | 9.47034200  | 1.25492000  | 0.66887400  | C | -8.00315500  | -0.28479500 | 0.02461300  |
| H  | 4.15529800  | 0.77961900  | 1.02926700  | H | -7.25603200  | -0.32059500 | -1.94022200 |
| C  | 7.79658300  | -1.52977200 | 0.59929000  | C | -6.23590400  | 1.02359600  | 0.88970800  |
| H  | 8.88010100  | -1.51664900 | 0.56434500  | H | -5.43329900  | 1.31164500  | -1.06272600 |
| C  | 2.50383600  | -1.78324100 | -2.64101700 | H | -8.04314400  | -0.89978300 | 0.91250500  |
| O  | 7.27452300  | -2.17363800 | -0.52920500 | H | -6.14761600  | 0.31564400  | 1.71246600  |
| H  | 7.07024700  | -3.08236100 | -0.32422600 | O | -7.53891200  | 0.99510500  | 0.36055300  |
| H  | 7.49382400  | -2.03169600 | 1.51367500  | O | -9.25297100  | -0.15235200 | -0.53890100 |
| H  | 5.22808700  | -5.01531300 | -1.32411000 | O | -3.96517400  | 0.75505000  | 0.24959600  |
| H  | 4.54301500  | -5.83808100 | 0.06360200  | C | -5.99089400  | 2.41675200  | 1.43604500  |
| O  | 6.17371100  | -4.62771100 | 0.40583400  | H | -6.79436500  | 2.67097500  | 2.11952300  |
| H  | 5.96800700  | -4.41714500 | 1.30979700  | H | -5.06022100  | 2.43127800  | 1.98115700  |
| H  | 3.28962300  | -2.47195900 | -2.92152200 | O | -5.87875200  | 3.38127800  | 0.41966500  |
| H  | 1.66219800  | -1.89391400 | -3.31492000 | H | -6.70654200  | 3.44240300  | -0.04123600 |
| O  | 2.08664900  | -2.01755100 | -1.31967800 | O | -4.90406000  | -1.12165700 | -1.85992500 |
| H  | 5.23270300  | 2.93984200  | 1.73459700  | H | -3.97640200  | -1.15632600 | -1.65889900 |
| H  | 3.81310300  | -0.54570900 | -0.75000800 | C | -10.36306800 | -0.04993800 | 0.24384400  |
| H  | 4.91159900  | 1.73515200  | -2.36490100 | C | -10.34662100 | 0.37557700  | 1.56147800  |
| O  | 1.03320000  | 2.57019000  | -2.56907700 | C | -11.56330400 | -0.38723600 | -0.36722400 |
| H  | 0.36001000  | -2.47404300 | 0.40921200  | C | -11.54052500 | 0.44323100  | 2.26724400  |
| O  | 5.30489500  | 1.65298000  | -0.42658200 | H | -9.42840200  | 0.66855700  | 2.03033300  |
| H  | 4.39319500  | -2.85840300 | -0.47560100 | C | -12.74412500 | -0.30487900 | 0.34404500  |
| H  | 2.74545900  | 2.13796800  | -3.43201600 | H | -11.54868800 | -0.71173600 | -1.39108700 |
| A6 |             |             |             | C | -12.74053500 | 0.10711600  | 1.66974900  |
| C  | -0.73498900 | 2.19278800  | -0.87155300 | H | -11.52288600 | 0.77068400  | 3.29149600  |
| C  | -1.94212900 | 1.97440500  | 0.05628500  | H | -13.66971800 | -0.56884600 | -0.13567100 |
| C  | -2.95563000 | 1.06288500  | -0.63127300 | H | -13.65971800 | 0.16646300  | 2.22353300  |
| C  | -1.30376400 | 0.01864000  | -1.99120200 | H | 0.33408000   | 0.32907500  | -0.62938100 |
| C  | -0.17347800 | 0.87185200  | -1.41179500 | N | -7.48109900  | -2.26080500 | -1.36286800 |
| H  | -1.61621400 | 1.48396800  | 0.96637900  | H | -7.62362800  | -2.46572200 | -2.32398600 |
| H  | -1.07106800 | 2.77680300  | -1.72526000 | C | -7.68594600  | -4.65974600 | -1.09478600 |
| H  | -1.69726100 | 0.52390600  | -2.87171300 | H | -6.78074300  | -5.03548700 | -1.56196700 |
| H  | -3.36227600 | 1.55969800  | -1.51102500 | H | -7.97204900  | -5.33629500 | -0.30292900 |
| O  | -2.33634100 | -0.12034300 | -1.02678900 | H | -8.46703500  | -4.62354400 | -1.84548400 |
| O  | 0.30319000  | 2.88552000  | -0.23651000 | N | -2.61842500  | 3.22224900  | 0.39684300  |
| C  | -0.92026200 | -1.40108800 | -2.37770700 | H | -3.56478900  | 3.33192700  | 0.10066400  |
| H  | -0.08949300 | -1.38092200 | -3.06240600 | C | -3.09058100  | 5.20335300  | 1.73146000  |
| H  | -1.77120600 | -1.85340500 | -2.88519600 | H | -3.16533000  | 5.23460800  | 2.81115000  |
| H  | 0.00427600  | 3.29807400  | 0.57375400  | H | -2.62501300  | 6.12820700  | 1.41021900  |
| O  | -0.53432300 | -2.16892800 | -1.27902500 | H | -4.07769700  | 5.12825400  | 1.29730100  |
| H  | -1.23161000 | -2.15942800 | -0.63694900 | C | -2.17707100  | 4.06215600  | 1.35363800  |

|   |             |             |             |    |             |             |             |
|---|-------------|-------------|-------------|----|-------------|-------------|-------------|
| O | -1.09158700 | 3.93705600  | 1.87428300  | H  | 9.66047800  | 2.56276800  | -1.33708500 |
| C | -7.40544200 | -3.29885100 | -0.49717500 | H  | 4.80017400  | 1.35383800  | 0.54210100  |
| O | -7.12368900 | -3.15692000 | 0.66431600  | C  | 8.74790000  | -0.30717200 | -0.11373800 |
| C | 7.51100800  | 3.36051600  | -0.02996400 | H  | 9.76645900  | -0.12517400 | -0.43729900 |
| C | 6.13915200  | 3.01231800  | 0.53138000  | C  | 3.16916200  | -2.58895900 | -1.59355400 |
| C | 5.66391200  | 1.67009600  | -0.01008700 | O  | 8.19398400  | -1.38726800 | -0.81204300 |
| C | 7.89803500  | 0.91560300  | -0.38833300 | H  | 8.26779900  | -2.18514700 | -0.29480100 |
| C | 8.48477800  | 2.20748100  | 0.17481300  | H  | 8.76130200  | -0.49590900 | 0.95574400  |
| H | 7.41405800  | 3.55300100  | -1.09693200 | H  | 6.80894600  | -4.62599500 | -0.13532900 |
| H | 7.78184500  | 1.01147300  | -1.46496500 | H  | 6.63326000  | -5.01133800 | 1.56537500  |
| H | 8.66503500  | 2.08884100  | 1.23416800  | O  | 7.94439500  | -3.49915100 | 1.07995500  |
| O | 6.63439500  | 0.67850200  | 0.19535400  | H  | 7.87437200  | -3.02594700 | 1.90150700  |
| C | 4.40278700  | 1.04860300  | -1.99977200 | H  | 4.03827200  | -3.18256100 | -1.84322500 |
| C | 3.00444400  | 1.61391700  | -1.75645100 | H  | 2.27574700  | -3.08152600 | -1.96070300 |
| C | 4.48299100  | -0.43901900 | -1.65746900 | O  | 3.07358900  | -2.40619700 | -0.20445500 |
| C | 2.01299700  | 0.74012800  | -2.52376200 | H  | 5.42093500  | 3.77221400  | 0.24306300  |
| H | 2.95834500  | 2.62455100  | -2.15453200 | H  | 4.46160800  | -0.55555200 | -0.58751000 |
| C | 3.29529900  | -1.21972200 | -2.23885100 | H  | 4.62975900  | 1.14855800  | -3.05473000 |
| H | 3.47934000  | -1.35923200 | -3.30335200 | O  | 0.70047900  | 1.19510400  | -2.47144600 |
| O | 2.06613700  | -0.56213200 | -2.06304300 | H  | 1.89011300  | -2.50990900 | 1.97949700  |
| C | 6.74303500  | -4.19817500 | 0.85464500  | O  | 5.39312700  | 1.83281800  | -1.36157400 |
| C | 5.51803600  | -3.29267600 | 0.92571800  | H  | 5.64444800  | -2.48255600 | 0.21653000  |
| C | 5.30321300  | -2.70760600 | 2.32551500  | H  | 2.26667300  | 0.77551700  | -3.58201700 |
| C | 3.16937400  | -3.51895000 | 0.60670700  | B1 |             |             |             |
| C | 3.92719800  | -2.07474400 | 2.48466500  | C  | 1.28662600  | -3.54311200 | -1.62044300 |
| H | 5.38764700  | -3.50112800 | 3.05579600  | C  | 2.66665700  | -3.04009600 | -1.17063100 |
| C | 2.84022500  | -3.03268100 | 2.01201900  | C  | 3.24091700  | -2.07977400 | -2.22194100 |
| H | 2.48246000  | -4.29762700 | 0.30296700  | C  | 1.06515400  | -1.45115300 | -2.96744800 |
| H | 3.87335000  | -1.16649300 | 1.89194800  | C  | 0.40231000  | -2.33821000 | -1.91736300 |
| O | 4.43301200  | -4.10325800 | 0.55023900  | H  | 2.50980800  | -2.48773700 | -0.25122000 |
| O | 6.31922200  | -1.77889200 | 2.65559500  | H  | 1.37733700  | -4.12987800 | -2.52627900 |
| H | 6.30795300  | -1.04686400 | 2.04477900  | H  | 1.17547600  | -2.01821800 | -3.89138500 |
| O | 3.67002400  | -1.78631100 | 3.83459200  | H  | 3.46779500  | -2.63856000 | -3.12442500 |
| H | 4.39729800  | -1.28827100 | 4.18639100  | O  | 2.33808900  | -1.06244800 | -2.49591800 |
| O | 2.76517100  | -4.15130200 | 2.84618700  | O  | 0.67753000  | -4.29359100 | -0.61834300 |
| H | 2.71089100  | -3.84142400 | 3.74175800  | C  | 0.30371400  | -0.17308000 | -3.27812200 |
| O | 5.62136000  | -1.02774100 | -2.21520300 | H  | -0.65314400 | -0.42351000 | -3.70520900 |
| H | 6.36816100  | -1.00207900 | -1.62517500 | H  | 0.87248000  | 0.39439000  | -4.01030400 |
| O | 2.75104000  | 1.60893100  | -0.38772000 | H  | 1.31546378  | -4.38177012 | 0.08243866  |
| H | 1.96749000  | 2.12446800  | -0.20956700 | O  | 0.05903900  | 0.59696400  | -2.13586400 |
| O | 6.20031600  | 2.89068000  | 1.92396300  | H  | 0.88198000  | 0.96387800  | -1.82460000 |
| H | 6.61864400  | 3.67130600  | 2.26553800  | C  | 5.49359131  | -0.14351186 | -3.50591217 |
| O | 7.95749700  | 4.51529300  | 0.63058700  | C  | 6.76877790  | 0.07464096  | -4.33173775 |
| H | 8.88732800  | 4.61676100  | 0.46850900  | C  | 5.54017408  | -1.48076122 | -2.75691022 |
| O | 9.73663100  | 2.52209300  | -0.39165700 | H  | 5.43357446  | 0.64728950  | -2.76148673 |

|   |             |             |             |   |             |             |             |
|---|-------------|-------------|-------------|---|-------------|-------------|-------------|
| C | 7.98013508  | -0.10024706 | -3.42170093 | C | -3.27674600 | -0.91439300 | 3.37862400  |
| H | 6.83259311  | -0.68001450 | -5.10760537 | C | -3.71845900 | -0.72129900 | 1.93357700  |
| C | 6.84525689  | -1.58209399 | -1.95977941 | C | -6.02802900 | -0.66604900 | 2.53633900  |
| H | 5.48960856  | -2.29691599 | -3.46351530 | C | -5.69836900 | -0.82647900 | 4.01853100  |
| H | 7.98926323  | 0.67098246  | -2.65115237 | H | -4.51034600 | -2.59684200 | 3.84156200  |
| H | 6.82868689  | -0.82516280 | -1.17648544 | H | -6.19630700 | -1.64489800 | 2.09522600  |
| O | 7.94043531  | -1.34886180 | -2.82758523 | H | -5.60380000 | 0.15014300  | 4.47263700  |
| O | 9.11121265  | 0.00125811  | -4.20076643 | O | -4.94541000 | -0.04162000 | 1.87833300  |
| O | 4.45130300  | -1.49777100 | -1.86296000 | C | -3.61610700 | -2.16331100 | -0.03804300 |
| C | 7.13214447  | -2.92898828 | -1.32054244 | C | -2.12722300 | -2.18289400 | -0.39636500 |
| H | 8.04819760  | -2.84003361 | -0.74305873 | C | -4.37756200 | -1.15770300 | -0.90219300 |
| H | 6.32931366  | -3.20535573 | -0.66115813 | C | -2.04856600 | -2.51611700 | -1.88704300 |
| O | 7.25881343  | -3.94699434 | -2.27556813 | H | -1.62455900 | -2.94453500 | 0.18461800  |
| H | 7.98484489  | -3.74199268 | -2.85099140 | C | -3.97206200 | -1.24309500 | -2.38573800 |
| O | 4.33468816  | -0.10031788 | -4.28460120 | H | -4.51229900 | -2.07658400 | -2.83010500 |
| H | 3.55062248  | -0.23773716 | -3.75602570 | O | -2.59117800 | -1.42632600 | -2.57720900 |
| C | 10.33195839 | 0.24771719  | -3.63861949 | C | -7.17406100 | 3.05767700  | -1.13147500 |
| C | 10.62017541 | 0.07426853  | -2.29598000 | C | -5.72278600 | 2.59201300  | -1.17842800 |
| C | 11.30971320 | 0.69902663  | -4.51484024 | C | -4.80588000 | 3.43621500  | -0.28795600 |
| C | 11.89579295 | 0.37385867  | -1.83461631 | C | -4.01656200 | 2.38842800  | -2.82718400 |
| H | 9.88350910  | -0.31139238 | -1.62012590 | C | -3.33135800 | 3.17895300  | -0.56858900 |
| C | 12.57558334 | 0.98394485  | -4.04249182 | H | -4.99973000 | 4.48354700  | -0.47693000 |
| H | 11.06194484 | 0.81468254  | -5.55376245 | C | -3.04175100 | 3.27488300  | -2.06241300 |
| C | 12.87595623 | 0.82817432  | -2.69593662 | H | -3.92308300 | 2.55205900  | -3.89283400 |
| H | 12.11737668 | 0.23774104  | -0.79126415 | H | -3.06506900 | 2.18379900  | -0.22533400 |
| H | 13.32907483 | 1.33134546  | -4.72631986 | O | -5.34115200 | 2.69404000  | -2.52748300 |
| H | 13.86091668 | 1.05210292  | -2.32930251 | O | -5.09513300 | 3.23689600  | 1.08258000  |
| H | 0.26513800  | -1.77454200 | -1.01171900 | H | -4.93971800 | 2.32762600  | 1.32588800  |
| N | 6.82956769  | 1.39640673  | -4.94162269 | O | -2.53326600 | 4.13872900  | 0.07401700  |
| H | 6.53403443  | 1.45743843  | -5.89018027 | H | -2.78361700 | 4.18207600  | 0.98851200  |
| C | 6.45487789  | 3.79661658  | -4.98480687 | O | -3.21350000 | 4.58539600  | -2.51829400 |
| H | 5.37908787  | 3.93431152  | -5.03046570 | H | -2.71540200 | 5.15739600  | -1.94773500 |
| H | 6.88375263  | 4.63685670  | -4.45861498 | O | -5.75603400 | -1.38661100 | -0.87108900 |
| H | 6.84054437  | 3.76127239  | -5.99663039 | H | -6.19434100 | -0.85008400 | -0.21768800 |
| N | 3.65150600  | -4.07102300 | -0.88304900 | O | -1.53695100 | -0.94601900 | -0.08741000 |
| H | 4.42761472  | -4.03044998 | -1.50729280 | H | -1.43269300 | -0.39781800 | -0.86142300 |
| C | 4.93968106  | -5.85359932 | 0.10360700  | O | -2.98960200 | 0.35672700  | 3.88954300  |
| H | 5.47786938  | -5.74866478 | 1.03758283  | H | -2.84448900 | 0.26730300  | 4.82337100  |
| H | 4.58533220  | -6.87589648 | 0.04302570  | O | -3.97896100 | -1.56897500 | 5.53510800  |
| H | 5.61117780  | -5.65913901 | -0.72279487 | H | -4.73063200 | -1.77113000 | 6.07843600  |
| C | 3.73554572  | -4.93445167 | 0.13993105  | O | -6.72546100 | -1.47885100 | 4.73001600  |
| O | 2.93907500  | -5.02529009 | 1.04801900  | H | -6.90745700 | -2.32116100 | 4.33156500  |
| C | 6.74881885  | 2.53307866  | -4.21260740 | H | -3.01121500 | -0.09107400 | 1.42962900  |
| O | 6.89215961  | 2.53998878  | -3.01449119 | C | -7.25407300 | 0.18549600  | 2.28194200  |
| C | -4.38265300 | -1.57416200 | 4.19101400  | H | -8.08798900 | -0.19382900 | 2.86113300  |

|    |             |             |             |   |             |             |             |
|----|-------------|-------------|-------------|---|-------------|-------------|-------------|
| C  | -4.35264200 | 0.03148100  | -3.11789900 | H | 8.52244500  | 0.02440000  | 0.97214000  |
| O  | -7.54712400 | 0.14146200  | 0.91247500  | H | 6.46570900  | 0.11012800  | 2.22144400  |
| H  | -7.82835800 | 1.00218900  | 0.61355100  | O | 7.01958700  | -1.34124300 | 0.87228700  |
| H  | -7.05237900 | 1.20209000  | 2.60588600  | O | 8.93435700  | -1.50497100 | -0.29819300 |
| H  | -7.75540600 | 2.47274900  | -1.82968200 | O | 4.44762200  | 1.19602800  | 1.08339400  |
| H  | -7.23116400 | 4.09797000  | -1.43636400 | C | 5.14532300  | -1.56288900 | 2.23106200  |
| O  | -7.75527400 | 2.87756000  | 0.13786700  | H | 5.75104400  | -2.02968500 | 3.00284000  |
| H  | -7.20808700 | 3.30440200  | 0.78773800  | H | 4.31287700  | -1.06543900 | 2.69528500  |
| H  | -5.42530400 | 0.16639300  | -3.08128600 | O | 4.62483100  | -2.53752300 | 1.36931300  |
| H  | -4.03697200 | -0.03344000 | -4.15455400 | H | 5.34519700  | -3.00616100 | 0.96722200  |
| O  | -3.68887800 | 1.09174700  | -2.47915000 | O | 5.63868700  | 1.73063400  | -1.40404300 |
| H  | -2.39171900 | -1.54120400 | 3.38745900  | H | 6.23226800  | 2.37893600  | -1.78079900 |
| H  | -4.14294200 | -0.16622000 | -0.55487800 | C | 9.87513600  | -2.12231800 | 0.47756300  |
| H  | -4.03131500 | -3.14609900 | -0.22483900 | C | 9.81374400  | -2.20023200 | 1.85807400  |
| O  | -0.81960400 | -2.81089100 | -2.43000600 | C | 10.93590600 | -2.69347800 | -0.21175100 |
| H  | -2.03429900 | 2.92263600  | -2.25519800 | C | 10.83640900 | -2.84194800 | 2.54465100  |
| O  | -3.81160800 | -1.97676200 | 1.35324800  | H | 8.97954100  | -1.79639300 | 2.39578600  |
| H  | -5.68172100 | 1.55858200  | -0.85265600 | C | 11.94096000 | -3.33558700 | 0.48455600  |
| H  | -2.65625700 | -3.39463500 | -2.08059500 | H | 10.95435000 | -2.63050200 | -1.28425700 |
| B2 |             |             |             | C | 11.90050300 | -3.40957100 | 1.87009600  |
| C  | 1.02268600  | 1.39900100  | -0.49582800 | H | 10.78631800 | -2.90091400 | 3.61711300  |
| C  | 2.54833500  | 1.56383100  | -0.43292300 | H | 12.75920800 | -3.77700800 | -0.05548400 |
| C  | 3.06711700  | 1.11593700  | 0.93685600  | H | 12.68405500 | -3.90764500 | 2.41103800  |
| C  | 1.28737400  | -0.43380200 | 1.21721600  | H | 0.94327200  | -0.70907600 | -0.88510900 |
| C  | 0.63589400  | -0.02509300 | -0.10186100 | N | 8.57931500  | 0.88354600  | -1.53146600 |
| H  | 2.96937800  | 0.90847500  | -1.18708000 | H | 9.32384800  | 0.25519600  | -1.73411600 |
| H  | 0.54261100  | 2.07900100  | 0.19567400  | C | 10.07448100 | 2.43827800  | -2.61819500 |
| H  | 0.83608000  | 0.15613100  | 2.01339800  | H | 9.91405700  | 2.51740500  | -3.68789800 |
| H  | 2.67716600  | 1.77974200  | 1.70224900  | H | 10.42942100 | 3.39690400  | -2.26537000 |
| O  | 2.67428500  | -0.19080800 | 1.17677200  | H | 10.82613700 | 1.68198300  | -2.43080300 |
| O  | 0.57292200  | 1.62892700  | -1.79703500 | N | 3.03631100  | 2.90693900  | -0.70627500 |
| C  | 1.12186600  | -1.91271300 | 1.53689500  | H | 4.02558100  | 2.91805300  | -0.81857600 |
| H  | 0.06996600  | -2.15784300 | 1.54530900  | C | 3.26628600  | 5.24750900  | -1.23885700 |
| H  | 1.51906600  | -2.09553700 | 2.53257600  | H | 3.04413200  | 5.62129600  | -2.23116800 |
| H  | 0.45071000  | 2.57011900  | -1.87584500 | H | 3.00687300  | 6.02512100  | -0.53085400 |
| O  | 1.74423100  | -2.72485500 | 0.59168700  | H | 4.32543400  | 5.03649500  | -1.16498700 |
| H  | 2.68603700  | -2.67027300 | 0.71998800  | C | 2.38102100  | 4.04733900  | -0.97165200 |
| C  | 6.32687700  | 1.11224500  | -0.36257300 | O | 1.17658900  | 4.17369600  | -1.00652900 |
| C  | 7.45050700  | 0.20906600  | -0.89252100 | C | 8.74403600  | 2.14888700  | -1.95804500 |
| C  | 5.30514500  | 0.28737200  | 0.43200500  | O | 7.91823900  | 3.02769700  | -1.85760500 |
| H  | 6.74543000  | 1.85684400  | 0.30841700  | C | -7.29109900 | -3.29306800 | -1.91997500 |
| C  | 8.02563100  | -0.62240100 | 0.25192500  | C | -5.91054700 | -3.65039300 | -2.45778300 |
| H  | 7.01151500  | -0.48254800 | -1.60382500 | C | -4.82184000 | -2.93819200 | -1.65845300 |
| C  | 6.01556100  | -0.56180000 | 1.49167100  | C | -6.22592200 | -2.66438600 | 0.23077900  |
| H  | 4.76227000  | -0.35995800 | -0.24167100 | C | -7.35811800 | -3.46352300 | -0.40679300 |

|   |             |             |             |    |             |             |             |
|---|-------------|-------------|-------------|----|-------------|-------------|-------------|
| H | -7.50153000 | -2.25135700 | -2.15548700 | H  | -8.17378800 | 1.08727800  | -0.88839600 |
| H | -6.36123800 | -1.61855900 | -0.01093700 | H  | -8.98181400 | 1.84174300  | 0.47019100  |
| H | -7.24193200 | -4.51221500 | -0.16607600 | O  | -8.60274600 | -0.17803500 | 0.61424000  |
| O | -4.99017900 | -3.11183300 | -0.29362000 | H  | -8.56439800 | -0.20580200 | 1.56457300  |
| C | -3.68419400 | -0.81387300 | -1.93359900 | H  | -4.54547500 | 3.25249700  | -1.89281000 |
| C | -2.82337200 | -0.95838500 | -0.67770000 | H  | -3.02694100 | 3.73594800  | -1.12375400 |
| C | -4.16936800 | 0.62422900  | -2.05965100 | O  | -4.28629000 | 2.65046200  | 0.06270000  |
| C | -1.64863700 | -0.00073400 | -0.87723500 | H  | -5.83432200 | -3.34211900 | -3.49661000 |
| H | -2.46233600 | -1.96904500 | -0.55585500 | H  | -4.97402700 | 0.73313100  | -1.34815900 |
| C | -3.09887200 | 1.68546400  | -1.75597700 | H  | -3.06505700 | -1.06368200 | -2.79269300 |
| H | -2.58267700 | 1.91662200  | -2.68308700 | O  | -0.74542500 | -0.16201600 | 0.14352600  |
| O | -2.16698200 | 1.29283700  | -0.77972900 | H  | -4.24437300 | 3.89587700  | 2.21724200  |
| C | -8.22961700 | 1.11014800  | 0.19100000  | O  | -4.86002500 | -1.58988300 | -1.99813800 |
| C | -6.87627500 | 1.53443600  | 0.75104000  | H  | -6.13561100 | 0.78931900  | 0.48299200  |
| C | -6.88071500 | 1.69816700  | 2.27140500  | H  | -1.17789300 | -0.14916000 | -1.84054400 |
| C | -5.38395300 | 3.38455400  | 0.49041400  | B3 |             |             |             |
| C | -5.55458900 | 2.27776000  | 2.73921600  | C  | 0.34475000  | -2.64870200 | -1.59033300 |
| H | -7.66893800 | 2.38630200  | 2.54648400  | C  | 1.58271500  | -2.57799000 | -0.67529900 |
| C | -5.25844900 | 3.57662700  | 1.99922900  | C  | 2.47713400  | -1.38423500 | -1.02987500 |
| H | -5.41260700 | 4.35476600  | 0.01535200  | C  | 0.73035200  | -0.20832000 | -2.12062800 |
| H | -4.76145900 | 1.56139300  | 2.53601300  | C  | -0.29376400 | -1.26987000 | -1.74489200 |
| O | -6.57861600 | 2.76656100  | 0.13399900  | H  | 1.22978600  | -2.42728200 | 0.33974800  |
| O | -7.16583300 | 0.49329100  | 2.94175600  | H  | 0.64421700  | -2.99455800 | -2.57634600 |
| H | -6.50177400 | -0.17452300 | 2.75565600  | H  | 1.16614700  | -0.44643500 | -3.08975300 |
| O | -5.59257100 | 2.57651500  | 4.10902500  | H  | 2.97858200  | -1.56919000 | -1.97639100 |
| H | -5.99753200 | 1.84819500  | 4.56452800  | O  | 1.74094900  | -0.20126200 | -1.12826900 |
| O | -6.17597500 | 4.56628200  | 2.36402600  | O  | -0.64853100 | -3.46258900 | -1.05827900 |
| H | -6.22759300 | 4.57762300  | 3.31206200  | C  | 0.16370900  | 1.19975400  | -2.17386700 |
| O | -4.63732100 | 0.90071700  | -3.35213300 | H  | -0.60462100 | 1.25365300  | -2.92709800 |
| H | -5.37547200 | 0.33353100  | -3.53263800 | H  | 0.96110200  | 1.88907700  | -2.44256500 |
| O | -3.51634400 | -0.60694300 | 0.49150600  | H  | -0.33891600 | -4.36476200 | -1.10949600 |
| H | -3.37979700 | 0.32150600  | 0.65488000  | O  | -0.42730900 | 1.57532900  | -0.96098200 |
| O | -5.67320200 | -5.02144100 | -2.33535700 | H  | 0.22300500  | 1.53542300  | -0.27130400 |
| H | -6.44771200 | -5.47734800 | -2.64194000 | C  | 4.85027900  | 0.66429400  | -0.59033700 |
| O | -8.21970600 | -4.12603500 | -2.56138000 | C  | 6.33065300  | 1.03922600  | -0.73957500 |
| H | -9.03833500 | -4.07727300 | -2.08184300 | C  | 4.71858400  | -0.83139400 | -0.32048500 |
| O | -8.62631200 | -3.08611700 | 0.05963900  | H  | 4.41810300  | 1.20233000  | 0.24430300  |
| H | -8.71245400 | -2.13553800 | 0.05378500  | C  | 7.20772300  | 0.45069400  | 0.36935900  |
| H | -3.86453600 | -3.37899700 | -1.89965900 | H  | 6.68012700  | 0.59177700  | -1.66152400 |
| C | -6.14644200 | -2.78513500 | 1.74113700  | C  | 5.58798200  | -1.19267700 | 0.88007100  |
| H | -7.13921400 | -2.75176700 | 2.16550700  | H  | 5.07031900  | -1.38261800 | -1.18513600 |
| C | -3.75998600 | 2.94249300  | -1.21397800 | H  | 7.05351100  | 0.96584200  | 1.30709400  |
| O | -5.42403300 | -1.71797400 | 2.30751300  | H  | 5.28977600  | -0.59277800 | 1.73865500  |
| H | -4.62879900 | -1.56814500 | 1.80057200  | O  | 6.92128900  | -0.91183700 | 0.52969700  |
| H | -5.69289300 | -3.73556600 | 2.00260700  | O  | 8.51567200  | 0.56796000  | -0.04653600 |

|   |             |             |             |   |             |             |             |
|---|-------------|-------------|-------------|---|-------------|-------------|-------------|
| O | 3.39969500  | -1.22773700 | -0.01632700 | C | -4.71318200 | -1.43765900 | -1.50192500 |
| C | 5.52174200  | -2.65415500 | 1.27931300  | C | -3.20529900 | -1.37848600 | -1.23913200 |
| H | 6.25796400  | -2.83558500 | 2.05583000  | C | -5.17552700 | -0.11309900 | -2.09618400 |
| H | 4.54459700  | -2.87947900 | 1.67873000  | C | -2.58968000 | -1.15754900 | -2.62767100 |
| O | 5.72376800  | -3.51449700 | 0.18939200  | H | -2.83650400 | -2.29325900 | -0.80383300 |
| H | 6.59316800  | -3.36678200 | -0.16225000 | C | -4.24713000 | 0.46443400  | -3.17744900 |
| O | 4.22789300  | 1.03565700  | -1.78863800 | H | -4.57378400 | 0.07179500  | -4.13664700 |
| H | 3.28824100  | 1.00303000  | -1.65803200 | O | -2.88343300 | 0.16306000  | -2.98899100 |
| C | 9.53743100  | 0.54936600  | 0.85428800  | C | -6.46770000 | 2.84127300  | 1.24876600  |
| C | 9.44946900  | -0.01680100 | 2.11492200  | C | -5.11523900 | 2.89159500  | 0.54638800  |
| C | 10.72483100 | 1.13023100  | 0.42965600  | C | -4.05670400 | 3.66464700  | 1.33300700  |
| C | 10.55571100 | 0.01971500  | 2.95333900  | C | -4.25630400 | 3.69744800  | -1.53356200 |
| H | 8.54665000  | -0.49600300 | 2.43754400  | C | -2.78775100 | 3.79859800  | 0.50687100  |
| C | 11.82008500 | 1.14972800  | 1.27057700  | H | -4.43503900 | 4.65503600  | 1.54939200  |
| H | 10.76739800 | 1.55969700  | -0.55399800 | C | -3.10039500 | 4.42101200  | -0.84780600 |
| C | 11.74168300 | 0.59795700  | 2.54202600  | H | -4.61784200 | 4.31235000  | -2.34565300 |
| H | 10.48219600 | -0.41812300 | 3.93287900  | H | -2.35268900 | 2.81684100  | 0.35160800  |
| H | 12.73617700 | 1.60223000  | 0.93509900  | O | -5.35030800 | 3.52341400  | -0.69203400 |
| H | 12.59349100 | 0.61764600  | 3.19710500  | O | -3.77844300 | 3.07272100  | 2.58094900  |
| H | -0.75062200 | -0.99650300 | -0.80933800 | H | -3.41004600 | 2.19377900  | 2.46842500  |
| N | 6.52585200  | 2.46687000  | -0.88121000 | O | -1.86229100 | 4.63992200  | 1.14684600  |
| H | 6.75613800  | 2.79582500  | -1.78929800 | H | -1.83322300 | 4.40844900  | 2.06726700  |
| C | 6.31823900  | 4.82532000  | -0.36829000 | O | -3.49289600 | 5.75513100  | -0.69583400 |
| H | 6.40454600  | 5.44257000  | 0.51386200  | H | -2.87360600 | 6.17180300  | -0.10890000 |
| H | 7.17535800  | 4.98528700  | -1.01224300 | O | -6.43840800 | -0.22624500 | -2.69474200 |
| H | 5.42447300  | 5.11873800  | -0.91041900 | H | -7.06687000 | -0.47122100 | -2.02815500 |
| N | 2.46277500  | -3.74782000 | -0.72926100 | O | -2.87766700 | -0.32155300 | -0.37080500 |
| H | 3.38991500  | -3.57492200 | -0.40711800 | H | -2.65340200 | 0.46090600  | -0.86793600 |
| C | 3.34009100  | -6.00022900 | -0.86434200 | O | -6.25477300 | -4.25144300 | 1.89202900  |
| H | 3.07257300  | -6.75869800 | -0.13829500 | H | -7.00760000 | -4.45393300 | 2.43419900  |
| H | 3.46739700  | -6.49638300 | -1.81908100 | O | -8.25224100 | -2.62576600 | 2.73208600  |
| H | 4.26847200  | -5.53093300 | -0.57196000 | H | -8.49992700 | -2.05938200 | 3.45341800  |
| C | 2.17677000  | -5.04017500 | -0.98636500 | O | -6.73035000 | -0.48749600 | 3.84660400  |
| O | 1.08977600  | -5.45825100 | -1.31171400 | H | -6.83032900 | 0.31321200  | 3.33687000  |
| C | 6.18553100  | 3.38004600  | 0.05793700  | H | -4.71438800 | -3.43305400 | 0.12234800  |
| O | 5.79173600  | 3.07088900  | 1.15256700  | C | -3.79299100 | -0.49501200 | 3.17165100  |
| C | -7.16715900 | -2.03484200 | 2.06834100  | H | -4.19517500 | 0.11511100  | 3.96719500  |
| C | -6.55243900 | -3.09718000 | 1.16442900  | C | -4.35310100 | 1.98032700  | -3.19223700 |
| C | -5.23908700 | -2.59867100 | 0.56574400  | O | -2.90756900 | 0.31847500  | 2.43835000  |
| C | -4.91786300 | -1.01439000 | 2.29692300  | H | -2.72716000 | -0.09119300 | 1.59502900  |
| C | -6.14638300 | -1.49411200 | 3.06294300  | H | -3.26459200 | -1.33301300 | 3.61412600  |
| H | -7.51442900 | -1.20703700 | 1.45258100  | H | -7.18292800 | 2.34900500  | 0.60454400  |
| H | -5.21576900 | -0.21427200 | 1.63213400  | H | -6.82093700 | 3.85246300  | 1.42693100  |
| H | -5.86376300 | -2.28742400 | 3.74255500  | O | -6.41790500 | 2.10956500  | 2.44875200  |
| O | -4.39464300 | -2.08677500 | 1.53744700  | H | -5.72480000 | 2.47058900  | 2.99168000  |



|    |             |             |             |   |              |             |             |
|----|-------------|-------------|-------------|---|--------------|-------------|-------------|
| H  | -5.39756200 | 2.25822500  | -3.26836100 | O | -5.79266700  | -2.84371300 | -0.78913000 |
| H  | -3.81447100 | 2.38067800  | -4.04461400 | H | -6.33113800  | -3.02483000 | -0.02838000 |
| O  | -3.78301900 | 2.47936300  | -2.00569100 | O | -4.68099300  | 1.80172400  | 1.12418000  |
| H  | -7.23816400 | -3.32452100 | 0.35310900  | H | -3.94624100  | 1.99738800  | 0.55534900  |
| H  | -5.22028700 | 0.58381500  | -1.27350200 | C | -10.26956500 | -0.21479000 | 1.41309100  |
| H  | -4.90339600 | -2.24269400 | -2.20738700 | C | -10.73631200 | -0.65245900 | 0.18507700  |
| O  | -1.23823000 | -1.35531100 | -2.78474200 | C | -11.14257700 | -0.07393300 | 2.48344900  |
| H  | -2.22641100 | 4.34780500  | -1.48615800 | C | -12.08822800 | -0.93074500 | 0.03344700  |
| O  | -5.54848300 | -1.62848900 | -0.38364700 | H | -10.06328100 | -0.79493200 | -0.63683600 |
| H  | -4.76214400 | 1.87814900  | 0.39176200  | C | -12.48274000 | -0.36458400 | 2.32058400  |
| H  | -3.05327300 | -1.83301600 | -3.33761400 | H | -10.75431600 | 0.26445300  | 3.42607800  |
| B4 |             |             |             | C | -12.96656700 | -0.79119400 | 1.09128900  |
| C  | -0.80199100 | -0.65629500 | -1.85220100 | H | -12.44728200 | -1.26710800 | -0.92288200 |
| C  | -2.33642900 | -0.74978000 | -2.04210800 | H | -13.15310700 | -0.25219200 | 3.15394000  |
| C  | -3.09464100 | -0.02031000 | -0.93259700 | H | -14.01056100 | -1.01288100 | 0.96473700  |
| C  | -1.26014300 | 1.31548000  | -0.29309100 | H | -0.31170000  | 1.38582100  | -2.20159400 |
| C  | -0.34282600 | 0.71813000  | -1.34969300 | N | -7.37387700  | 2.47311700  | 1.80845800  |
| H  | -2.58934200 | -0.26821000 | -2.98001400 | H | -7.14276600  | 2.66052500  | 2.75582100  |
| H  | -0.50178600 | -1.40131100 | -1.12049600 | C | -8.05702100  | 4.79686500  | 1.79317200  |
| H  | -1.17582600 | 0.73937100  | 0.62616600  | H | -8.74348300  | 5.40787000  | 1.22570300  |
| H  | -2.99103600 | -0.56041800 | 0.00689900  | H | -8.44964700  | 4.63500300  | 2.79047500  |
| O  | -2.59267800 | 1.26994200  | -0.76419900 | H | -7.11236300  | 5.32496500  | 1.88024300  |
| O  | -0.13193600 | -0.83798600 | -3.06201900 | N | -2.83051100  | -2.12758300 | -2.03288300 |
| C  | -0.95477900 | 2.77412900  | 0.00943600  | H | -3.62256700  | -2.31411100 | -1.45635600 |
| H  | 0.05916100  | 2.86145300  | 0.36787400  | C | -3.27643100  | -4.38422200 | -2.81308900 |
| H  | -1.62321300 | 3.11436300  | 0.79759000  | H | -3.64644000  | -4.65076300 | -3.79508600 |
| H  | -0.45445700 | -1.63067500 | -3.48710300 | H | -2.57642500  | -5.15431600 | -2.50904900 |
| O  | -1.06356200 | 3.58338500  | -1.12405600 | H | -4.09683200  | -4.34761200 | -2.11039900 |
| H  | -1.94755100 | 3.52514400  | -1.46222300 | C | -2.51856200  | -3.08162300 | -2.93213600 |
| C  | -5.73899300 | 1.33016100  | 0.33849300  | O | -1.66802900  | -2.94692100 | -3.78115000 |
| C  | -6.94430100 | 1.19621500  | 1.27807600  | C | -7.83140500  | 3.49784800  | 1.05177500  |
| C  | -5.41612400 | -0.02026900 | -0.29093800 | O | -8.03470700  | 3.39293100  | -0.12998200 |
| H  | -5.96771000 | 2.03170500  | -0.45466100 | C | 8.22937600   | 2.55402900  | -0.84815200 |
| C  | -8.10398200 | 0.41780200  | 0.64992900  | C | 7.12590900   | 3.14605200  | -1.71695700 |
| H  | -6.62030300 | 0.60805100  | 2.12736400  | C | 5.75670300   | 2.64704700  | -1.26159700 |
| C  | -6.67381800 | -0.58635500 | -0.94083700 | C | 6.53646800   | 2.14541400  | 0.91891400  |
| H  | -5.09135800 | -0.70348900 | 0.48496200  | C | 7.91896000   | 2.72394600  | 0.63443100  |
| H  | -8.60832000 | 1.00399100  | -0.10535300 | H | 8.31060900   | 1.48927500  | -1.05972500 |
| H  | -7.04987000 | 0.11450600  | -1.68469700 | H | 6.54727300   | 1.09007000  | 0.68091800  |
| O  | -7.62424800 | -0.76990000 | 0.07966300  | H | 7.92777100   | 3.77866700  | 0.87648600  |
| O  | -8.96595000 | 0.08489000  | 1.67116500  | O | 5.58207400   | 2.80062000  | 0.10487100  |
| O  | -4.42117500 | 0.06872100  | -1.28798600 | C | 4.38052900   | 0.75931700  | -1.91238500 |
| C  | -6.46306700 | -1.92734700 | -1.61679000 | C | 3.25238200   | 1.06971500  | -0.92693500 |
| H  | -7.42719000 | -2.31974100 | -1.92318000 | C | 4.62010600   | -0.74424300 | -1.96018200 |
| H  | -5.85130900 | -1.79830500 | -2.49612800 | C | 2.02848000   | 0.33321100  | -1.46956300 |

|   |             |             |             |    |             |             |             |
|---|-------------|-------------|-------------|----|-------------|-------------|-------------|
| H | 3.05438700  | 2.12987200  | -0.86908800 | H  | 5.17201200  | -0.98836800 | -1.06481100 |
| C | 3.33824300  | -1.59333200 | -1.99307800 | H  | 4.06936500  | 1.10759400  | -2.89498400 |
| H | 3.05221300  | -1.73512500 | -3.03056400 | O  | 0.92099000  | 0.67116400  | -0.72906300 |
| O | 2.26478700  | -1.02987800 | -1.27957500 | H  | 2.97302100  | -3.93271000 | 2.05569300  |
| C | 7.77903800  | -1.92868800 | 1.25905700  | O  | 5.64714800  | 1.30987000  | -1.63018000 |
| C | 6.27273000  | -2.09694700 | 1.42680100  | H  | 5.77329900  | -1.23279700 | 1.00312100  |
| C | 5.84418000  | -2.24526100 | 2.88712200  | H  | 1.87049900  | 0.54693800  | -2.51885500 |
| C | 4.60303500  | -3.65332000 | 0.71112300  | B5 |             |             |             |
| C | 4.36084500  | -2.57205500 | 2.96608100  | C  | 0.68745800  | -3.53779700 | -1.50977100 |
| H | 6.39703600  | -3.06173700 | 3.33235300  | C  | 2.07610200  | -3.06877400 | -1.05325200 |
| C | 4.04855500  | -3.80389600 | 2.12510400  | C  | 2.73178900  | -2.23553200 | -2.16389700 |
| H | 4.58804800  | -4.61833800 | 0.22485200  | C  | 0.61666900  | -1.55591800 | -3.03287800 |
| H | 3.78982900  | -1.72654700 | 2.58818600  | C  | -0.12444200 | -2.32373300 | -1.94356500 |
| O | 5.93720200  | -3.26072000 | 0.70474400  | H  | 1.92637400  | -2.43387100 | -0.18752800 |
| O | 6.14769100  | -1.10594400 | 3.65600500  | H  | 0.77830600  | -4.20304400 | -2.35992500 |
| H | 5.68715900  | -0.33055600 | 3.32702900  | H  | 0.71881700  | -2.19507700 | -3.90917900 |
| O | 3.97863200  | -2.85870400 | 4.28453200  | H  | 2.95025500  | -2.88274000 | -3.00737700 |
| H | 4.37372400  | -2.21401900 | 4.85930900  | O  | 1.89467600  | -1.19926800 | -2.55217400 |
| O | 4.64549200  | -4.93902000 | 2.68045100  | O  | 0.00065600  | -4.17016500 | -0.47612100 |
| H | 4.44585700  | -4.94682600 | 3.60876500  | C  | -0.06880800 | -0.26482500 | -3.44880700 |
| O | 5.36081600  | -1.11460200 | -3.09081800 | H  | -1.04684000 | -0.49316600 | -3.84212900 |
| H | 6.20825200  | -0.69113700 | -3.04887300 | H  | 0.51930800  | 0.19979800  | -4.23616800 |
| O | 3.52965000  | 0.61510100  | 0.37176600  | H  | 0.30779100  | -5.07154900 | -0.45648100 |
| H | 3.20913500  | -0.27816800 | 0.45293200  | O  | -0.24158400 | 0.61119400  | -2.37371600 |
| O | 7.10580800  | 4.53832300  | -1.60804400 | H  | 0.60837300  | 0.96226600  | -2.12213400 |
| H | 8.00030600  | 4.84768300  | -1.68515200 | C  | 5.04550400  | -1.07414200 | 0.20228200  |
| O | 9.42478600  | 3.20288400  | -1.18964300 | C  | 5.38399500  | 0.11035500  | 1.11927200  |
| H | 10.06604300 | 3.01355100  | -0.51479700 | C  | 4.05779100  | -0.63786800 | -0.88852000 |
| O | 8.92996100  | 2.13020900  | 1.40476800  | H  | 5.94855100  | -1.42424300 | -0.28918600 |
| H | 8.84937000  | 1.17950000  | 1.38150100  | C  | 5.83176000  | 1.30148800  | 0.27554300  |
| H | 4.99094800  | 3.24931200  | -1.73039900 | H  | 4.47349400  | 0.40276900  | 1.63146700  |
| C | 6.07945900  | 2.29150700  | 2.35815400  | C  | 4.58208100  | 0.60975400  | -1.60848400 |
| H | 6.90060200  | 2.08257600  | 3.02800800  | H  | 3.10002900  | -0.41563800 | -0.44009300 |
| C | 3.60267400  | -2.94329200 | -1.34635100 | H  | 6.77083600  | 1.07456100  | -0.22500800 |
| O | 5.05510300  | 1.37702900  | 2.66948600  | H  | 5.49414300  | 0.33958500  | -2.13941600 |
| H | 4.41141500  | 1.37008100  | 1.96442100  | O  | 4.85965400  | 1.61796000  | -0.65708800 |
| H | 5.74742600  | 3.31028600  | 2.52897300  | O  | 5.99729500  | 2.37236400  | 1.13132600  |
| H | 8.01669400  | -1.90706300 | 0.20468500  | O  | 3.96407400  | -1.69293800 | -1.81781400 |
| H | 8.28914200  | -2.78074300 | 1.69802800  | C  | 3.62644100  | 1.25908100  | -2.59389100 |
| O | 8.24659300  | -0.72430800 | 1.81403600  | H  | 4.15115700  | 2.07562400  | -3.08196800 |
| H | 7.96881000  | -0.68282100 | 2.72306300  | H  | 3.31576600  | 0.54907700  | -3.33891400 |
| H | 4.47843200  | -3.39000600 | -1.80135800 | O  | 2.47043500  | 1.73759000  | -1.96165900 |
| H | 2.74981000  | -3.59680200 | -1.49157300 | H  | 2.72151200  | 2.37387100  | -1.30381100 |
| O | 3.80177700  | -2.74165600 | 0.03626900  | O  | 4.44905900  | -2.11226100 | 0.91420700  |
| H | 7.27692100  | 2.84681200  | -2.75019600 | H  | 5.13246200  | -2.50051900 | 1.45880300  |

|   |             |             |             |   |             |             |             |
|---|-------------|-------------|-------------|---|-------------|-------------|-------------|
| C | 6.72952400  | 3.46473900  | 0.75998300  | C | -6.98136600 | 3.49675800  | -0.40418300 |
| C | 7.08080700  | 3.75681300  | -0.54652800 | C | -5.64548700 | 2.80061000  | -0.60911400 |
| C | 7.11744100  | 4.30340700  | 1.79578000  | C | -4.50983600 | 3.43689800  | 0.18667500  |
| C | 7.84115700  | 4.89011600  | -0.80452900 | C | -4.16397900 | 2.43219000  | -2.47778600 |
| H | 6.75298700  | 3.13677000  | -1.35659900 | C | -3.16835300 | 2.87840900  | -0.25269600 |
| C | 7.86615800  | 5.43113200  | 1.52229900  | H | -4.52594500 | 4.50623600  | 0.02606100  |
| H | 6.82123600  | 4.06189100  | 2.79999900  | C | -2.98776700 | 3.07349600  | -1.75238400 |
| C | 8.23820100  | 5.72963800  | 0.21868400  | H | -4.15575600 | 2.69138600  | -3.52840400 |
| H | 8.11266000  | 5.11460500  | -1.82044900 | H | -3.14420200 | 1.82151700  | -0.03191500 |
| H | 8.16210400  | 6.07733400  | 2.32906300  | O | -5.39074500 | 2.88401700  | -2.00025600 |
| H | 8.82237700  | 6.60639400  | 0.00724300  | O | -4.72379900 | 3.16067000  | 1.55667700  |
| H | -0.27691600 | -1.67271900 | -1.10031400 | H | -4.05840600 | 3.63783200  | 2.03754100  |
| N | 6.42656600  | -0.11757500 | 2.11814700  | O | -2.15172300 | 3.53418600  | 0.46516700  |
| H | 6.66985200  | 0.71757200  | 2.60140900  | H | -1.57032600 | 2.87084100  | 0.82893800  |
| C | 8.05417800  | -1.04701600 | 3.64116800  | O | -2.96795600 | 4.43411800  | -2.08463000 |
| H | 7.61859700  | -1.39658700 | 4.57091000  | H | -2.32060600 | 4.85545700  | -1.53257400 |
| H | 8.91446900  | -1.66567800 | 3.42554400  | O | -6.30213100 | -1.58435800 | -0.98053600 |
| H | 8.36890200  | -0.01867400 | 3.76602900  | H | -6.61949700 | -1.52448300 | -0.08889200 |
| N | 2.99733400  | -4.12174200 | -0.65616400 | O | -2.16840700 | -0.77289300 | -0.28636300 |
| H | 3.80082300  | -3.75183300 | -0.19880800 | H | -2.20885400 | -0.28722500 | -1.10626300 |
| C | 4.04850800  | -6.22947000 | -0.13652300 | O | -4.05142700 | -2.75014000 | 4.58751400  |
| H | 3.72398700  | -6.78091900 | 0.73818600  | H | -4.57549300 | -2.59328900 | 5.36353500  |
| H | 4.35486500  | -6.95118000 | -0.88333000 | O | -5.92327700 | -0.81707800 | 4.99734100  |
| H | 4.89327700  | -5.60665000 | 0.12859300  | H | -6.04153500 | 0.07104900  | 5.31224600  |
| C | 2.86418500  | -5.45639900 | -0.67908100 | O | -4.43907100 | 1.48960000  | 4.14575600  |
| O | 1.89330400  | -6.05522000 | -1.08713400 | H | -4.79549800 | 1.82899900  | 3.32997700  |
| C | 7.03736000  | -1.24052700 | 2.53741500  | H | -3.30476900 | -3.15401600 | 2.20423700  |
| O | 6.81845000  | -2.35046100 | 2.10774800  | C | -1.76485600 | 0.83203100  | 2.91361800  |
| C | -5.17351600 | -0.76881500 | 3.81237800  | H | -1.97589800 | 1.79692600  | 3.35251800  |
| C | -4.72309300 | -2.19027900 | 3.49924900  | C | -4.79337000 | 0.17195500  | -3.03417000 |
| C | -3.75334200 | -2.17746000 | 2.32110200  | O | -1.12614600 | 1.07240700  | 1.68509400  |
| C | -3.05862800 | 0.05224800  | 2.75104400  | H | -1.21590200 | 0.30510400  | 1.12512400  |
| C | -3.98351700 | 0.17168700  | 3.95988600  | H | -1.10969200 | 0.28540700  | 3.58488200  |
| H | -5.79446800 | -0.41071100 | 2.99409800  | H | -7.23443300 | 3.49893300  | 0.64653900  |
| H | -3.57852800 | 0.42770600  | 1.87844800  | H | -7.74629400 | 2.94039600  | -0.94129200 |
| H | -3.44357900 | -0.09171400 | 4.85983600  | O | -6.94589000 | 4.82787000  | -0.82487400 |
| O | -2.70447400 | -1.29957900 | 2.54277200  | H | -6.61159200 | 4.84608900  | -1.71305700 |
| C | -4.12441500 | -2.19466000 | -0.10308700 | H | -5.84626100 | 0.40577600  | -2.93348500 |
| C | -2.64080000 | -2.08375400 | -0.46209500 | H | -4.51726700 | 0.20737600  | -4.08326000 |
| C | -4.93790800 | -1.25756000 | -0.98923600 | O | -4.00288400 | 1.06710200  | -2.29671700 |
| C | -2.57442700 | -2.49924100 | -1.93886400 | H | -5.58664200 | -2.79251600 | 3.23187100  |
| H | -2.03671800 | -2.74265000 | 0.14259400  | H | -4.79074300 | -0.27666000 | -0.56747700 |
| C | -4.51515800 | -1.21358100 | -2.46820000 | H | -4.43748900 | -3.22378500 | -0.25892300 |
| H | -5.09602500 | -1.95552400 | -3.00900600 | O | -1.34373800 | -2.78009400 | -2.47936700 |
| O | -3.14157700 | -1.45075700 | -2.67451800 | H | -2.07875900 | 2.58368800  | -2.08197000 |

|    |             |             |             |   |             |             |             |
|----|-------------|-------------|-------------|---|-------------|-------------|-------------|
| O  | -4.49704200 | -1.81347300 | 1.20362300  | H | 8.27068400  | 2.39478700  | -2.23712500 |
| H  | -5.74232900 | 1.76111700  | -0.31104200 | C | 10.65528100 | 4.49069700  | -0.06623100 |
| H  | -3.16346600 | -3.39793500 | -2.08625700 | H | 9.78846100  | 3.45357100  | 1.59877200  |
| B6 |             |             |             | C | 10.66695700 | 4.64038300  | -1.44619400 |
| C  | 1.22321300  | -2.79627000 | -0.02406500 | H | 9.80357700  | 3.98534800  | -3.28403700 |
| C  | 2.74577700  | -2.60232700 | 0.00617000  | H | 11.30950300 | 5.08469600  | 0.54628300  |
| C  | 3.20654000  | -1.96752400 | -1.31276600 | H | 11.32752700 | 5.34936600  | -1.91055300 |
| C  | 1.11128100  | -0.87619800 | -1.63507500 | H | 0.73158600  | -0.76502600 | 0.46141200  |
| C  | 0.55245700  | -1.46584800 | -0.34562700 | N | 8.35293400  | -0.54608100 | 1.51762900  |
| H  | 2.96393500  | -1.91274000 | 0.81389800  | H | 8.91050800  | 0.23088400  | 1.79274300  |
| H  | 0.95194800  | -3.49905200 | -0.80203100 | C | 10.12771300 | -1.75294600 | 2.62545800  |
| H  | 0.83801600  | -1.52860400 | -2.46330200 | H | 9.94026800  | -1.92834200 | 3.67919700  |
| H  | 3.03771800  | -2.67132900 | -2.12171000 | H | 10.72224100 | -2.57630800 | 2.25392500  |
| O  | 2.51568400  | -0.78709200 | -1.54218200 | H | 10.68032000 | -0.82841300 | 2.51619000  |
| O  | 0.74510900  | -3.23444900 | 1.20956200  | N | 3.52675300  | -3.80470800 | 0.24785300  |
| C  | 0.60401100  | 0.52865700  | -1.92053500 | H | 4.48072400  | -3.59046800 | 0.43591700  |
| H  | -0.47261200 | 0.50604100  | -2.00121200 | C | 4.27092200  | -6.06324900 | 0.65304700  |
| H  | 1.00880300  | 0.85627000  | -2.87470000 | H | 4.08048100  | -6.54587300 | 1.60421100  |
| H  | 0.85737900  | -4.18023000 | 1.22491600  | H | 4.24748400  | -6.82896200 | -0.11256400 |
| O  | 0.93694400  | 1.42048600  | -0.90120000 | H | 5.25290800  | -5.60812700 | 0.67352700  |
| H  | 1.86736800  | 1.61566400  | -0.95937100 | C | 3.14695400  | -5.08472600 | 0.38097900  |
| C  | 6.28766400  | -1.24365300 | 0.19863500  | O | 2.00773000  | -5.48794000 | 0.30010300  |
| C  | 7.12468100  | -0.12868300 | 0.84331000  | C | 8.80015800  | -1.75625000 | 1.89941400  |
| C  | 5.13633500  | -0.64648800 | -0.62239400 | O | 8.21921900  | -2.80111500 | 1.71212000  |
| H  | 6.91153100  | -1.82140800 | -0.47724700 | C | -5.33072600 | 3.69962000  | 2.29394000  |
| C  | 7.53176900  | 0.88963100  | -0.21924500 | C | -3.87397100 | 3.53280100  | 2.70856900  |
| H  | 6.49333700  | 0.38772500  | 1.55868400  | C | -3.18233300 | 2.53826500  | 1.78024900  |
| C  | 5.66576100  | 0.41874000  | -1.58874800 | C | -4.67590200 | 2.97748800  | -0.01261600 |
| H  | 4.41432100  | -0.19702900 | 0.04418600  | C | -5.45405600 | 4.00437400  | 0.80591800  |
| H  | 8.20832700  | 0.43143300  | -0.93773900 | H | -5.86084500 | 2.77205000  | 2.49913500  |
| H  | 6.30567800  | -0.07222400 | -2.32096200 | H | -5.15780400 | 2.01322700  | 0.09407200  |
| O  | 6.41078100  | 1.37850300  | -0.86566300 | H | -5.05866300 | 4.99436200  | 0.62077300  |
| O  | 8.16503600  | 1.93043900  | 0.43100700  | O | -3.34480700 | 2.89281100  | 0.45122000  |
| O  | 4.56866500  | -1.69556200 | -1.37237900 | C | -3.05163100 | 0.08770000  | 1.80987300  |
| C  | 4.61208900  | 1.22182800  | -2.33108300 | C | -2.23765200 | -0.02133700 | 0.52057700  |
| H  | 5.12086800  | 1.87653000  | -3.03305900 | C | -4.15734700 | -0.95963200 | 1.80886600  |
| H  | 3.95709700  | 0.56720800  | -2.87701600 | C | -1.66868400 | -1.44526300 | 0.51972300  |
| O  | 3.81857700  | 1.97546300  | -1.45526500 | H | -1.43942000 | 0.70728100  | 0.49464700  |
| H  | 4.37446100  | 2.58534900  | -0.98701000 | C | -3.74171100 | -2.34905400 | 1.29660500  |
| O  | 5.71967600  | -2.07351900 | 1.16299300  | H | -3.40491700 | -2.93899700 | 2.14373000  |
| H  | 6.43469900  | -2.57811200 | 1.54887100  | O | -2.73479000 | -2.31517200 | 0.31282000  |
| C  | 8.95961000  | 2.80848200  | -0.25159100 | C | -9.23109400 | -0.99925500 | 0.77139400  |
| C  | 8.94981600  | 2.95644000  | -1.62767000 | C | -7.88219800 | -0.92431800 | 0.07426200  |
| C  | 9.80859200  | 3.57807700  | 0.53168900  | C | -7.87296500 | 0.03625900  | -1.11096500 |
| C  | 9.81314000  | 3.87242800  | -2.21478000 | C | -6.47991100 | -2.47388500 | -1.13334500 |

|    |              |             |             |   |              |             |             |
|----|--------------|-------------|-------------|---|--------------|-------------|-------------|
| C  | -6.59815700  | -0.12280400 | -1.92054100 | C | -0.30719200  | -2.14203300 | 1.41576200  |
| H  | -8.72801300  | -0.17462500 | -1.73876400 | C | -1.49665500  | -2.12528400 | 0.43143000  |
| C  | -6.43836800  | -1.57219000 | -2.36142800 | C | -2.55479100  | -1.13101700 | 0.91262200  |
| H  | -6.53820500  | -3.51508600 | -1.42211100 | C | -1.05554900  | 0.12817100  | 2.19784400  |
| H  | -5.75753700  | 0.15050400  | -1.29983500 | C | 0.14123000   | -0.72189600 | 1.78575800  |
| O  | -7.60837000  | -2.24748000 | -0.35304700 | H | -1.14382500  | -1.79511200 | -0.53980200 |
| O  | -7.96553300  | 1.35417900  | -0.60987200 | H | -0.63921100  | -2.62935400 | 2.33208700  |
| H  | -8.05926000  | 1.92753500  | -1.36093400 | H | -1.51227700  | -0.29386900 | 3.09099300  |
| O  | -6.66131000  | 0.73156100  | -3.03465500 | H | -3.00352900  | -1.49005800 | 1.83724500  |
| H  | -5.84866700  | 1.23061900  | -3.07445500 | O | -1.97777800  | 0.10939000  | 1.13642100  |
| O  | -7.47312500  | -1.95730800 | -3.21839500 | O | 0.81441200   | -2.78630600 | 0.90384400  |
| H  | -7.54219400  | -1.30184200 | -3.90224300 | C | -0.74013300  | 1.58175600  | 2.47416800  |
| O  | -4.69416100  | -1.15534000 | 3.08950600  | H | 0.27773945   | 1.66866066  | 2.84288671  |
| H  | -5.02599500  | -0.32483700 | 3.40507400  | H | -1.41642457  | 1.96314700  | 3.22633249  |
| O  | -3.01380100  | 0.16146600  | -0.63457600 | H | 0.55648600   | -3.50529800 | 0.32936800  |
| H  | -3.36372300  | -0.68281500 | -0.90285500 | O | -0.89313010  | 2.27022069  | 1.25647648  |
| O  | -3.18731700  | 4.74417500  | 2.61050600  | H | -1.58176089  | 1.87154159  | 0.74394887  |
| H  | -3.71622500  | 5.41206500  | 3.02960700  | C | -5.15364300  | 0.63457500  | 0.78151300  |
| O  | -5.87040900  | 4.74035500  | 3.06478300  | C | -6.67199000  | 0.82693100  | 0.92812200  |
| H  | -6.70439500  | 4.99126600  | 2.68603400  | C | -4.85477200  | -0.79273300 | 0.32695300  |
| O  | -6.81196100  | 4.04801800  | 0.44017100  | H | -4.76363900  | 1.32215000  | 0.04159000  |
| H  | -7.17694900  | 3.16818000  | 0.44060900  | C | -7.47546100  | 0.26625400  | -0.24660300 |
| H  | -2.11688600  | 2.54633300  | 1.96196700  | H | -6.97729800  | 0.24874400  | 1.79106900  |
| C  | -4.60831000  | 3.32019700  | -1.49073700 | C | -5.70526200  | -1.15270900 | -0.88570000 |
| H  | -5.57739700  | 3.65620700  | -1.83131200 | H | -5.10420100  | -1.46875900 | 1.13708800  |
| C  | -4.93597100  | -3.02444000 | 0.63667000  | H | -7.35984100  | 0.87385900  | -1.13321100 |
| O  | -4.26170800  | 2.20821100  | -2.27687500 | H | -5.48248900  | -0.46805300 | -1.70289500 |
| H  | -3.57770000  | 1.71038600  | -1.83581000 | O | -7.05766300  | -1.04324100 | -0.51558600 |
| H  | -3.89538700  | 4.12623600  | -1.63220100 | O | -8.79566800  | 0.22281200  | 0.14869600  |
| H  | -9.52365900  | -0.01410600 | 1.10577600  | O | -3.51561500  | -0.99616100 | -0.05987800 |
| H  | -9.13399000  | -1.64357500 | 1.64221000  | C | -5.48105100  | -2.57072000 | -1.37902900 |
| O  | -10.23472500 | -1.46201900 | -0.08203900 | H | -6.20567900  | -2.78724300 | -2.15770600 |
| H  | -9.94261800  | -2.28058700 | -0.46342600 | H | -4.49108900  | -2.65647400 | -1.79876400 |
| H  | -5.74859500  | -3.11489300 | 1.34659900  | O | -5.56512200  | -3.51803500 | -0.34511400 |
| H  | -4.65558200  | -4.01020100 | 0.28118000  | H | -6.44155600  | -3.49674800 | 0.01909200  |
| O  | -5.30369700  | -2.20852700 | -0.44868200 | O | -4.61877200  | 0.89711900  | 2.04674400  |
| H  | -3.82918000  | 3.14901700  | 3.72379400  | H | -3.72788000  | 1.22563700  | 1.98396600  |
| H  | -4.91442300  | -0.56743200 | 1.14893800  | C | -9.79705600  | 0.17572600  | -0.77168800 |
| H  | -2.37639300  | -0.08748700 | 2.64453900  | C | -9.63521100  | -0.26669400 | -2.07412000 |
| O  | -0.82352400  | -1.65586700 | -0.55106500 | C | -11.04477300 | 0.59120400  | -0.32535800 |
| H  | -5.47484200  | -1.70514300 | -2.84506200 | C | -10.72882900 | -0.27255100 | -2.92963300 |
| O  | -3.74392700  | 1.29460700  | 2.04949200  | H | -8.68327400  | -0.62000900 | -2.41703300 |
| H  | -7.13380700  | -0.60385300 | 0.79226700  | C | -12.12555100 | 0.56992900  | -1.18461200 |
| H  | -1.16615900  | -1.67230700 | 1.45120100  | H | -11.14418900 | 0.92713300  | 0.69008600  |
| B7 |              |             |             | C | -11.97418200 | 0.14161600  | -2.49643900 |

|   |              |             |             |    |            |             |             |
|---|--------------|-------------|-------------|----|------------|-------------|-------------|
| H | -10.59744200 | -0.61387400 | -3.94105900 | H  | 3.91197700 | 1.16569300  | -1.38245900 |
| H | -13.08820800 | 0.89425900  | -0.83134900 | O  | 4.63983500 | 4.09714600  | -0.41510600 |
| H | -12.81522300 | 0.12953100  | -3.16555900 | O  | 6.05999800 | 1.70572900  | -2.74393000 |
| H | 0.62073500   | -0.27782000 | 0.92843100  | H  | 5.77564600 | 1.40641200  | -3.59917800 |
| N | -7.02181500  | 2.20200800  | 1.22008600  | O  | 3.30073500 | 1.48163200  | -3.30126800 |
| H | -7.25108500  | 2.40736900  | 2.16413000  | H  | 3.02616700 | 0.57626600  | -3.16953600 |
| C | -7.07783700  | 4.60884800  | 0.96603300  | O  | 2.51674000 | 4.01655000  | -2.37905000 |
| H | -6.22332300  | 4.92684400  | 1.55575200  | H  | 2.30162800 | 3.63161400  | -3.22055300 |
| H | -7.22016000  | 5.31024700  | 0.15706300  | O  | 5.95794700 | 1.06493300  | 3.12311800  |
| H | -7.95175300  | 4.60765800  | 1.60740800  | H  | 6.74036000 | 0.67309900  | 2.75684900  |
| N | -2.16845200  | -3.41856900 | 0.30482400  | O  | 2.95644800 | -0.46857500 | 0.48338100  |
| H | -3.16084600  | -3.40550900 | 0.40171800  | H  | 2.84984800 | 0.47227000  | 0.57791200  |
| C | -2.60639700  | -5.65030100 | -0.54964000 | O  | 7.20057200 | -4.18780300 | 0.21960200  |
| H | -2.41675200  | -6.06605600 | -1.53018100 | H  | 8.06061900 | -4.37457600 | -0.13678600 |
| H | -2.37670000  | -6.41661100 | 0.18332500  | O  | 8.95906000 | -2.46305800 | -0.93941300 |
| H | -3.64868500  | -5.37656700 | -0.45915200 | H  | 9.21433900 | -2.09689500 | -1.77772300 |
| C | -1.65890800  | -4.49290900 | -0.33294400 | O  | 7.21715700 | -1.18920000 | -2.83253300 |
| O | -0.50452100  | -4.56591300 | -0.68406600 | H  | 7.07057400 | -0.28417600 | -2.57441100 |
| C | -6.79792700  | 3.24038700  | 0.38333900  | H  | 5.27248300 | -3.19333500 | 1.50365400  |
| O | -6.39499400  | 3.09756000  | -0.74195500 | C  | 4.31332900 | -1.94904800 | -2.53219400 |
| C | 7.67975500   | -1.98532200 | -0.61929300 | H  | 4.72412500 | -1.58549800 | -3.46324600 |
| C | 7.15363800   | -2.82918800 | 0.53462200  | C  | 3.60439200 | 2.88988100  | 2.07766000  |
| C | 5.69496600   | -2.47768800 | 0.81201200  | O  | 3.11499200 | -1.24648900 | -2.31959500 |
| C | 5.31915000   | -1.73309300 | -1.41316400 | H  | 2.83233700 | -1.35993700 | -1.41592600 |
| C | 6.75283100   | -2.05629200 | -1.82661600 | H  | 4.12196300 | -3.01237600 | -2.63204800 |
| H | 7.74049800   | -0.94855200 | -0.29421800 | H  | 7.63386500 | 3.59793400  | -1.67103500 |
| H | 5.27508600   | -0.69561600 | -1.10612400 | H  | 7.18488500 | 4.49690700  | -0.22725200 |
| H | 6.79809100   | -3.05415100 | -2.24225400 | O  | 6.55673100 | 5.24690800  | -2.03296000 |
| O | 4.92591300   | -2.55814600 | -0.33594600 | H  | 5.80204400 | 5.70160600  | -1.68053200 |
| C | 4.65140300   | -0.76239600 | 2.19486900  | H  | 4.54125700 | 3.42411400  | 2.17584700  |
| C | 3.22021200   | -1.04620600 | 1.73308000  | H  | 2.79998200 | 3.50316100  | 2.47072500  |
| C | 4.87070900   | 0.74528200  | 2.29740600  | O  | 3.34719500 | 2.56854300  | 0.73129800  |
| C | 2.34010900   | -0.42608700 | 2.82505900  | H  | 7.73641800 | -2.62332600 | 1.42802700  |
| H | 3.01972900   | -2.09976100 | 1.64420200  | H  | 5.07695400 | 1.06538100  | 1.28773500  |
| C | 3.67645500   | 1.56852300  | 2.83032300  | H  | 4.79556100 | -1.22193700 | 3.16955500  |
| H | 3.84726700   | 1.75293600  | 3.88588600  | O  | 1.02575800 | -0.81595900 | 2.88345700  |
| O | 2.41117600   | 0.96479700  | 2.66134700  | H  | 1.85919300 | 2.46107500  | -1.22140700 |
| C | 6.83969000   | 4.16122200  | -1.20256700 | O  | 5.68914300 | -1.19001100 | 1.34313700  |
| C | 5.62733400   | 3.26587400  | -1.00413900 | H  | 5.89082700 | 2.46329300  | -0.32179600 |
| C | 5.11228200   | 2.65474100  | -2.30320000 | H  | 2.73191000 | -0.69635900 | 3.79923100  |
| C | 3.36525600   | 3.58559300  | -0.21937200 | B8 |            |             |             |
| C | 3.77121000   | 1.98043300  | -2.07680800 | C  | 0.86020900 | 0.96322200  | -1.71778000 |
| H | 5.00693000   | 3.43708300  | -3.04246600 | C  | 2.37997900 | 1.18715500  | -1.90248800 |
| C | 2.77935700   | 2.97463700  | -1.48682500 | C  | 3.19422100 | 0.31424000  | -0.94749700 |
| H | 2.76729800   | 4.42541700  | 0.10883500  | C  | 1.48653100 | -1.22020200 | -0.57155600 |

|   |             |             |             |   |             |             |             |
|---|-------------|-------------|-------------|---|-------------|-------------|-------------|
| C | 0.50916800  | -0.51816400 | -1.50485800 | N | 7.28330400  | -2.36597800 | 1.68347500  |
| H | 2.63542900  | 0.88541600  | -2.91270100 | H | 7.05530800  | -2.55219200 | 2.63175400  |
| H | 0.52303200  | 1.51584500  | -0.84648100 | C | 7.76198400  | -4.73785200 | 1.61263000  |
| H | 1.38552200  | -0.80843400 | 0.43009000  | H | 6.77583100  | -5.17579800 | 1.73409700  |
| H | 3.06277100  | 0.65684200  | 0.07575900  | H | 8.36372400  | -5.40147900 | 1.00921600  |
| O | 2.78679200  | -1.00705100 | -1.04931100 | H | 8.20873400  | -4.63004100 | 2.59440600  |
| O | 0.15741600  | 1.34516200  | -2.86009900 | N | 2.82388400  | 2.56045600  | -1.65469300 |
| C | 1.28497900  | -2.71807700 | -0.48900100 | H | 3.76420700  | 2.63450900  | -1.33100900 |
| H | 0.22086721  | -2.93806830 | -0.49005479 | C | 3.04656600  | 4.96911700  | -1.74046100 |
| H | 1.72418502  | -3.09161028 | 0.42752746  | H | 3.10636100  | 5.55874800  | -2.64662100 |
| H | 0.26929200  | 2.28864700  | -2.96647800 | H | 2.49349300  | 5.54904300  | -1.01029800 |
| O | 1.91129677  | -3.27823715 | -1.61572019 | H | 4.04179900  | 4.77556400  | -1.36490300 |
| H | 2.56861306  | -2.68508073 | -1.95091611 | C | 2.25447400  | 3.71645600  | -2.04437000 |
| C | 5.70950700  | -1.04725600 | 0.29592400  | O | 1.17183000  | 3.80320600  | -2.57845200 |
| C | 6.96086100  | -1.04294800 | 1.18992400  | C | 7.63223600  | -3.40995600 | 0.89833900  |
| C | 5.50785300  | 0.34077600  | -0.30935700 | O | 7.81696100  | -3.30271900 | -0.28649100 |
| H | 5.83156000  | -1.76142800 | -0.50815100 | C | -8.06114300 | -2.40364100 | -1.25501200 |
| C | 8.17062700  | -0.36105000 | 0.54754800  | C | -7.02501900 | -2.96196000 | -2.22227900 |
| H | 6.71896000  | -0.44698500 | 2.06083000  | C | -5.62174000 | -2.60726300 | -1.74019600 |
| C | 6.79997000  | 0.81511500  | -0.96534400 | C | -6.30222100 | -2.44287200 | 0.52817200  |
| H | 5.24883100  | 1.02973400  | 0.48689100  | C | -7.74712100 | -2.79575400 | 0.18374000  |
| H | 8.59391000  | -0.96654400 | -0.24180000 | H | -8.05364800 | -1.31787900 | -1.32396600 |
| H | 7.09550600  | 0.10738000  | -1.73874600 | H | -6.19890400 | -1.36490100 | 0.52301400  |
| O | 7.78937300  | 0.88412500  | 0.03156700  | H | -7.89911700 | -3.86133300 | 0.29395400  |
| O | 9.09370500  | -0.14673200 | 1.54885000  | O | -5.42334500 | -3.00343100 | -0.42729700 |
| O | 4.51871100  | 0.39108900  | -1.31100300 | C | -4.22782600 | -0.61938600 | -2.05652300 |
| C | 6.69124200  | 2.18976000  | -1.60046100 | C | -3.07825700 | -1.11771800 | -1.17861800 |
| H | 7.68030400  | 2.50431000  | -1.91842600 | C | -4.50311200 | 0.85222300  | -1.76746100 |
| H | 6.05368200  | 2.13856000  | -2.46942400 | C | -1.88675300 | -0.23123200 | -1.54223200 |
| O | 6.12063800  | 3.13909200  | -0.73742300 | H | -2.84918300 | -2.15437900 | -1.38124400 |
| H | 6.67961900  | 3.23814600  | 0.02341700  | C | -3.25419100 | 1.73119200  | -1.57485400 |
| O | 4.64615900  | -1.40671600 | 1.13108000  | H | -2.97441200 | 2.15239600  | -2.53472000 |
| H | 3.99293200  | -1.90874900 | 0.65568500  | O | -2.15916200 | 1.03666200  | -1.02524400 |
| C | 10.40877000 | 0.04497900  | 1.25460300  | C | -7.98455800 | 3.38628100  | 1.13179200  |
| C | 10.87418300 | 0.47959900  | 0.02471800  | C | -6.73273100 | 2.53439000  | 1.26776300  |
| C | 11.30006300 | -0.20767700 | 2.28912700  | C | -6.78503400 | 1.57849800  | 2.45564200  |
| C | 12.24007200 | 0.64170400  | -0.16516000 | C | -4.39348800 | 2.96627700  | 1.68065100  |
| H | 10.19076000 | 0.70861800  | -0.76845500 | C | -5.42465100 | 0.94886600  | 2.69733600  |
| C | 12.65499400 | -0.03194700 | 2.08872400  | H | -7.08964000 | 2.12958000  | 3.33488600  |
| H | 10.91317800 | -0.54085400 | 3.23420100  | C | -4.37415200 | 2.03555900  | 2.88779400  |
| C | 13.13591400 | 0.39015700  | 0.85672700  | H | -3.78373300 | 3.84176300  | 1.86110500  |
| H | 12.59705100 | 0.97639400  | -1.12291100 | H | -5.16214000 | 0.35286700  | 1.83555000  |
| H | 13.33872500 | -0.23057800 | 2.89476500  | O | -5.66670900 | 3.45657800  | 1.41467700  |
| H | 14.19105200 | 0.52256200  | 0.70070100  | O | -7.73751700 | 0.57428000  | 2.17095100  |
| H | 0.53718700  | -0.99920100 | -2.47870500 | H | -7.83609500 | 0.05695500  | 2.96105600  |

|    |             |             |             |   |             |             |             |
|----|-------------|-------------|-------------|---|-------------|-------------|-------------|
| O  | -5.50194400 | 0.12807200  | 3.83536800  | H | 3.46779500  | -2.63856000 | -3.12442500 |
| H  | -5.13580500 | -0.72534700 | 3.61546800  | O | 2.33808900  | -1.06244800 | -2.49591800 |
| O  | -4.63712800 | 2.79905700  | 4.02820300  | O | 0.67753000  | -4.29359100 | -0.61834300 |
| H  | -4.77814100 | 2.20086300  | 4.75236200  | C | 0.30371400  | -0.17308000 | -3.27812200 |
| O  | -5.25516900 | 1.45129800  | -2.78723000 | H | -0.65314400 | -0.42351000 | -3.70520900 |
| H  | -6.08015700 | 0.99014500  | -2.86507300 | H | 0.87248000  | 0.39439000  | -4.01030400 |
| O  | -3.34463500 | -1.00248800 | 0.19183400  | H | 1.01269100  | -5.18063700 | -0.69986900 |
| H  | -3.08108700 | -0.13353300 | 0.47973300  | O | 0.05903900  | 0.59696400  | -2.13586400 |
| O  | -7.10189100 | -4.35428300 | -2.28603100 | H | 0.88198000  | 0.96387800  | -1.82460000 |
| H  | -8.01451300 | -4.59011200 | -2.40085100 | C | 5.58156300  | -1.00722600 | 0.16226900  |
| O  | -9.31193900 | -2.90095300 | -1.64883200 | C | 5.89693900  | 0.08452100  | 1.19392100  |
| H  | -9.93585700 | -2.72894600 | -0.95375600 | C | 4.51609400  | -0.53643300 | -0.83499700 |
| O  | -8.65998000 | -2.17552500 | 1.05549800  | H | 6.48936100  | -1.21279800 | -0.40056400 |
| H  | -8.47800300 | -1.24184000 | 1.10642200  | C | 6.24493500  | 1.37303100  | 0.45582900  |
| H  | -4.88946300 | -3.14393400 | -2.32769300 | H | 5.01647300  | 0.28123700  | 1.79527800  |
| C  | -5.87171900 | -2.96046000 | 1.88993900  | C | 4.92877800  | 0.81224000  | -1.43474700 |
| H  | -6.66391100 | -2.79794200 | 2.60661900  | H | 3.56677000  | -0.42676000 | -0.33030700 |
| C  | -3.56961500 | 2.84424800  | -0.58510300 | H | 7.15737300  | 1.24133200  | -0.12618100 |
| O  | -4.73592900 | -2.29302500 | 2.37914900  | H | 5.82461600  | 0.66086800  | -2.03585400 |
| H  | -4.11585500 | -2.15819200 | 1.66702200  | O | 5.20461700  | 1.72362100  | -0.38584400 |
| H  | -5.68774400 | -4.02785500 | 1.81801400  | O | 6.42700300  | 2.36212400  | 1.39664200  |
| H  | -8.85130400 | 2.74756800  | 1.03865900  | O | 4.45130300  | -1.49777100 | -1.86296000 |
| H  | -7.89864600 | 3.98395300  | 0.22724300  | C | 3.88606500  | 1.50646900  | -2.29256300 |
| O  | -8.18698800 | 4.19827200  | 2.24931300  | H | 4.33051800  | 2.41153300  | -2.69737700 |
| H  | -7.39393900 | 4.69774100  | 2.39888300  | H | 3.59038400  | 0.86882200  | -3.10600200 |
| H  | -4.40222300 | 3.43561800  | -0.94503500 | O | 2.73020800  | 1.81877300  | -1.56392300 |
| H  | -2.70296600 | 3.48360600  | -0.45540800 | H | 2.96039800  | 2.40936400  | -0.85789600 |
| O  | -3.88856800 | 2.21220300  | 0.63165500  | O | 5.15408600  | -2.19842600 | 0.75352600  |
| H  | -7.17549900 | -2.52493000 | -3.20521500 | H | 5.19364700  | -2.15161300 | 1.70708700  |
| H  | -5.06357000 | 0.85533400  | -0.84618000 | C | 7.08963100  | 3.51557500  | 1.08447800  |
| H  | -3.93000100 | -0.74122800 | -3.09555600 | C | 7.31936700  | 3.95630600  | -0.20734700 |
| O  | -0.75777300 | -0.70522400 | -0.91710000 | C | 7.53997100  | 4.25481700  | 2.16991000  |
| H  | -3.38742600 | 1.58545400  | 2.95104600  | C | 8.02098800  | 5.13922800  | -0.40288300 |
| O  | -5.48752100 | -1.23097700 | -1.88318500 | H | 6.94095100  | 3.41301800  | -1.04986100 |
| H  | -6.60109000 | 1.95673000  | 0.35809400  | C | 8.22808200  | 5.43330900  | 1.95924800  |
| H  | -1.74284300 | -0.17955000 | -2.61360900 | H | 7.33876500  | 3.89505300  | 3.16198400  |
| B9 |             |             |             | C | 8.47832100  | 5.88127400  | 0.66912900  |
| C  | 1.28662600  | -3.54311200 | -1.62044300 | H | 8.19768300  | 5.47978600  | -1.40737800 |
| C  | 2.66665700  | -3.04009600 | -1.17063100 | H | 8.57269500  | 6.00234900  | 2.80393300  |
| C  | 3.24091700  | -2.07977400 | -2.22194100 | H | 9.01562000  | 6.79756500  | 0.50654900  |
| C  | 1.06515400  | -1.45115300 | -2.96744800 | H | 0.26513800  | -1.77454200 | -1.01171900 |
| C  | 0.40231000  | -2.33821000 | -1.91736300 | N | 7.00733000  | -0.26694700 | 2.06926200  |
| H  | 2.50980800  | -2.48773700 | -0.25122000 | H | 7.78313800  | 0.35670900  | 2.06807400  |
| H  | 1.37733700  | -4.12987800 | -2.52627900 | C | 7.97788300  | -0.99214800 | 4.17529500  |
| H  | 1.17547600  | -2.01821800 | -3.89138500 | H | 7.80688500  | -0.18538000 | 4.88116600  |



|   |             |             |             |     |             |             |             |
|---|-------------|-------------|-------------|-----|-------------|-------------|-------------|
| H | 7.98789000  | -1.92488200 | 4.72001700  | O   | -5.75603400 | -1.38661100 | -0.87108900 |
| H | 8.93808700  | -0.83478800 | 3.69882800  | H   | -6.19434100 | -0.85008400 | -0.21768800 |
| N | 3.65150600  | -4.07102300 | -0.88304900 | O   | -1.53695100 | -0.94601900 | -0.08741000 |
| H | 4.44274500  | -3.70667200 | -0.39842500 | H   | -1.43269300 | -0.39781800 | -0.86142300 |
| C | 4.82781100  | -6.15505500 | -0.59394600 | O   | -2.98960200 | 0.35672700  | 3.88954300  |
| H | 4.53048400  | -6.90818200 | 0.12533500  | H   | -2.84448900 | 0.26730300  | 4.82337100  |
| H | 5.23941500  | -6.66885000 | -1.45471400 | O   | -3.97896100 | -1.56897500 | 5.53510800  |
| H | 5.58997900  | -5.52189500 | -0.15820400 | H   | -4.73063200 | -1.77113000 | 6.07843600  |
| C | 3.58975900  | -5.40202200 | -1.03696100 | O   | -6.72546100 | -1.47885100 | 4.73001600  |
| O | 2.64868600  | -6.01200800 | -1.49471600 | H   | -6.90745700 | -2.32116100 | 4.33156500  |
| C | 6.84033300  | -1.01639100 | 3.18301800  | H   | -3.01121500 | -0.09107400 | 1.42962900  |
| O | 5.83873700  | -1.65960000 | 3.38091800  | C   | -7.25407300 | 0.18549600  | 2.28194200  |
| C | -4.38265300 | -1.57416200 | 4.19101400  | H   | -8.08798900 | -0.19382900 | 2.86113300  |
| C | -3.27674600 | -0.91439300 | 3.37862400  | C   | -4.35264200 | 0.03148100  | -3.11789900 |
| C | -3.71845900 | -0.72129900 | 1.93357700  | O   | -7.54712400 | 0.14146200  | 0.91247500  |
| C | -6.02802900 | -0.66604900 | 2.53633900  | H   | -7.82835800 | 1.00218900  | 0.61355100  |
| C | -5.69836900 | -0.82647900 | 4.01853100  | H   | -7.05237900 | 1.20209000  | 2.60588600  |
| H | -4.51034600 | -2.59684200 | 3.84156200  | H   | -7.75540600 | 2.47274900  | -1.82968200 |
| H | -6.19630700 | -1.64489800 | 2.09522600  | H   | -7.23116400 | 4.09797000  | -1.43636400 |
| H | -5.60380000 | 0.15014300  | 4.47263700  | O   | -7.75527400 | 2.87756000  | 0.13786700  |
| O | -4.94541000 | -0.04162000 | 1.87833300  | H   | -7.20808700 | 3.30440200  | 0.78773800  |
| C | -3.61610700 | -2.16331100 | -0.03804300 | H   | -5.42530400 | 0.16639300  | -3.08128600 |
| C | -2.12722300 | -2.18289400 | -0.39636500 | H   | -4.03697200 | -0.03344000 | -4.15455400 |
| C | -4.37756200 | -1.15770300 | -0.90219300 | O   | -3.68887800 | 1.09174700  | -2.47915000 |
| C | -2.04856600 | -2.51611700 | -1.88704300 | H   | -2.39171900 | -1.54120400 | 3.38745900  |
| H | -1.62455900 | -2.94453500 | 0.18461800  | H   | -4.14294200 | -0.16622000 | -0.55487800 |
| C | -3.97206200 | -1.24309500 | -2.38573800 | H   | -4.03131500 | -3.14609900 | -0.22483900 |
| H | -4.51229900 | -2.07658400 | -2.83010500 | O   | -0.81960400 | -2.81089100 | -2.43000600 |
| O | -2.59117800 | -1.42632600 | -2.57720900 | H   | -2.03429900 | 2.92263600  | -2.25519800 |
| C | -7.17406100 | 3.05767700  | -1.13147500 | O   | -3.81160800 | -1.97676200 | 1.35324800  |
| C | -5.72278600 | 2.59201300  | -1.17842800 | H   | -5.68172100 | 1.55858200  | -0.85265600 |
| C | -4.80588000 | 3.43621500  | -0.28795600 | H   | -2.65625700 | -3.39463500 | -2.08059500 |
| C | -4.01656200 | 2.38842800  | -2.82718400 | B10 |             |             |             |
| C | -3.33135800 | 3.17895300  | -0.56858900 | C   | 1.17792700  | -0.98145300 | -0.03920800 |
| H | -4.99973000 | 4.48354700  | -0.47693000 | C   | 2.67950800  | -1.30333600 | -0.00996800 |
| C | -3.04175100 | 3.27488300  | -2.06241300 | C   | 3.34946100  | -0.77975200 | -1.28390300 |
| H | -3.92308300 | 2.55205900  | -3.89283400 | C   | 1.77132800  | 0.98296500  | -1.50866000 |
| H | -3.06506900 | 2.18379900  | -0.22533400 | C   | 0.96817100  | 0.50956900  | -0.29869300 |
| O | -5.34115200 | 2.69404000  | -2.52748300 | H   | 3.09968000  | -0.77069400 | 0.83599900  |
| O | -5.09513300 | 3.23689600  | 1.08258000  | H   | 0.69186000  | -1.53094700 | -0.83429600 |
| H | -4.93971800 | 2.32762600  | 1.32588800  | H   | 1.32887200  | 0.53902200  | -2.39893900 |
| O | -2.53326600 | 4.13872900  | 0.07401700  | H   | 2.95227200  | -1.31157400 | -2.14301700 |
| H | -2.78361700 | 4.18207600  | 0.98851200  | O   | 3.11746400  | 0.58139900  | -1.40103000 |
| O | -3.21350000 | 4.58539600  | -2.51829400 | O   | 0.60366700  | -1.29749600 | 1.19341600  |
| H | -2.71540200 | 5.15739600  | -1.94773500 | C   | 1.78764100  | 2.49716100  | -1.66283000 |

|   |             |             |             |   |             |             |             |
|---|-------------|-------------|-------------|---|-------------|-------------|-------------|
| H | 0.77096100  | 2.85841200  | -1.71059500 | C | 2.95173600  | -5.10300500 | 0.44615700  |
| H | 2.27832900  | 2.74174300  | -2.60224500 | H | 2.52563700  | -5.60124200 | 1.30800900  |
| H | 0.38184700  | -2.22263000 | 1.15551800  | H | 2.77315500  | -5.73263100 | -0.41773700 |
| O | 2.41645900  | 3.12656200  | -0.59055100 | H | 4.01851600  | -4.98639800 | 0.58734800  |
| H | 3.35356100  | 2.97225500  | -0.65507900 | C | 2.21774700  | -3.79367400 | 0.23916500  |
| C | 6.48286400  | -1.28724800 | 0.21472600  | O | 1.00935900  | -3.79339800 | 0.14762300  |
| C | 7.64624500  | -0.59398900 | 0.93676800  | C | 8.36793300  | -2.06227600 | 2.77466000  |
| C | 5.61435900  | -0.27170900 | -0.53655000 | O | 7.29551900  | -2.00473700 | 3.32511000  |
| H | 6.90101700  | -1.96990700 | -0.52162700 | C | -6.74963300 | 4.35918200  | 0.89664600  |
| C | 8.40669800  | 0.26539100  | -0.06808300 | C | -6.03349400 | 3.70611000  | -0.27782900 |
| H | 7.25628300  | 0.06795900  | 1.70179100  | C | -5.57926100 | 2.29884700  | 0.08783000  |
| C | 6.49853600  | 0.59887700  | -1.43574600 | C | -7.27884400 | 2.06649800  | 1.74480500  |
| H | 5.09120700  | 0.35623800  | 0.17047700  | C | -7.84664300 | 3.44899600  | 1.43376000  |
| H | 8.86257400  | -0.36176900 | -0.83447600 | H | -6.02626700 | 4.54248100  | 1.68905500  |
| H | 6.92203000  | -0.03415500 | -2.21453500 | H | -6.54461100 | 2.14904000  | 2.54182800  |
| O | 7.53989900  | 1.16612000  | -0.66093700 | H | -8.62147500 | 3.35929100  | 0.68512900  |
| O | 9.38293000  | 0.95263000  | 0.61821000  | O | -6.65224000 | 1.54644600  | 0.59003700  |
| O | 4.72056800  | -0.99944800 | -1.34706300 | C | -3.54647600 | 1.42730400  | 1.11436600  |
| C | 5.81190600  | 1.78127100  | -2.09574700 | C | -2.44995300 | 1.68184600  | 0.07793800  |
| H | 6.52686300  | 2.26140900  | -2.75825900 | C | -4.06981900 | -0.01048700 | 1.06440700  |
| H | 4.97030700  | 1.44645200  | -2.67541600 | C | -1.37709900 | 0.61725500  | 0.26573900  |
| O | 5.33213100  | 2.69995500  | -1.15311400 | H | -2.03347100 | 2.66852800  | 0.23698600  |
| H | 6.06307400  | 3.03002100  | -0.64624500 | C | -2.92639500 | -1.02764600 | 0.91583800  |
| O | 5.67249000  | -2.02332500 | 1.08231300  | H | -2.44894700 | -1.15084400 | 1.88511000  |
| H | 6.01620000  | -2.01922900 | 1.97391600  | O | -1.97175900 | -0.61338600 | -0.02777700 |
| C | 10.44256200 | 1.51167600  | -0.03914000 | C | -7.98648600 | -3.15432400 | 0.74877000  |
| C | 10.47127600 | 1.75872500  | -1.40073300 | C | -6.90916800 | -2.51773300 | -0.12317100 |
| C | 11.53341200 | 1.83355200  | 0.75695500  | C | -7.46994500 | -1.96930700 | -1.43933700 |
| C | 11.61262000 | 2.31738800  | -1.96201500 | C | -4.91715000 | -3.24130100 | -1.21622400 |
| H | 9.61921700  | 1.55024100  | -2.01616400 | C | -6.37200800 | -1.63497900 | -2.43974700 |
| C | 12.65724500 | 2.39678200  | 0.18548600  | H | -8.10959400 | -2.71681900 | -1.88904400 |
| H | 11.48042300 | 1.64064800  | 1.81247100  | C | -5.40982800 | -2.80710200 | -2.59084700 |
| C | 12.70639000 | 2.63779400  | -1.18095600 | H | -4.34584200 | -4.15715800 | -1.29012000 |
| H | 11.63241800 | 2.50873100  | -3.01993000 | H | -5.81762500 | -0.76914000 | -2.08910400 |
| H | 13.49828900 | 2.64549300  | 0.80744000  | O | -5.97576800 | -3.54114200 | -0.36414200 |
| H | 13.58235400 | 3.07420200  | -1.62472000 | O | -8.29780300 | -0.84384300 | -1.21751000 |
| H | 1.26869800  | 1.06996300  | 0.57977500  | H | -7.79694100 | -0.13908300 | -0.81479100 |
| N | 8.57585700  | -1.53557400 | 1.54615800  | O | -6.91735400 | -1.37672700 | -3.70655700 |
| H | 9.52207400  | -1.48041300 | 1.24209900  | H | -7.61523000 | -0.73960200 | -3.61666300 |
| C | 9.56169300  | -2.71706800 | 3.42668600  | O | -6.04802500 | -3.90089300 | -3.18024100 |
| H | 10.09251900 | -1.97101700 | 4.00977200  | H | -6.47831800 | -3.59560600 | -3.96937600 |
| H | 9.21500000  | -3.48981400 | 4.09712700  | O | -4.74153200 | -0.35655100 | 2.23923300  |
| H | 10.24759900 | -3.13983000 | 2.70243600  | H | -5.67049100 | -0.15086800 | 2.19844800  |
| N | 3.00588500  | -2.71082200 | 0.16246600  | O | -2.94765300 | 1.64239900  | -1.23260400 |
| H | 3.97255900  | -2.84420100 | 0.36581400  | H | -2.79878800 | 0.77361400  | -1.58753500 |

|     |             |             |             |   |              |             |             |
|-----|-------------|-------------|-------------|---|--------------|-------------|-------------|
| O   | -6.90191900 | 3.58056900  | -1.36802400 | H | -0.40823800  | -1.21731400 | 0.33916000  |
| H   | -7.29457500 | 4.43033000  | -1.52555900 | C | -5.27049100  | -1.00047900 | -0.11810200 |
| O   | -7.28577100 | 5.57317700  | 0.44116100  | C | -6.67850100  | -1.55935000 | -0.35895400 |
| H   | -7.91439300 | 5.88615100  | 1.07990100  | C | -5.26684500  | 0.50951800  | -0.32564200 |
| O   | -8.46521300 | 4.04142900  | 2.55303800  | H | -4.96217900  | -1.20670900 | 0.89991900  |
| H   | -7.85120700 | 4.08192600  | 3.27602900  | C | -7.76828600  | -0.74840800 | 0.34854800  |
| H   | -5.25720600 | 1.79417600  | -0.80344800 | H | -6.88082600  | -1.46307600 | -1.41820500 |
| C   | -8.32568600 | 1.06089500  | 2.17454300  | C | -6.35923700  | 1.13999200  | 0.52999000  |
| H   | -8.91589900 | 1.47215500  | 2.98545300  | H | -5.48084200  | 0.72350100  | -1.36602400 |
| C   | -3.45006100 | -2.37953100 | 0.46547800  | H | -7.75498900  | -0.91796300 | 1.41593300  |
| O   | -7.66572700 | -0.10375700 | 2.58619000  | H | -6.19799700  | 0.88797100  | 1.57712500  |
| H   | -8.16398400 | -0.87305000 | 2.32282900  | O | -7.58835000  | 0.61736300  | 0.08762700  |
| H   | -8.99121200 | 0.86153300  | 1.33982900  | O | -8.97413700  | -1.13289200 | -0.19539900 |
| H   | -7.52520000 | -3.56975300 | 1.63303600  | O | -4.03646800  | 1.09794200  | 0.03461600  |
| H   | -8.45872600 | -3.96554400 | 0.20352700  | C | -6.43164300  | 2.65010100  | 0.41343300  |
| O   | -8.94716900 | -2.22312200 | 1.18659200  | H | -7.31771300  | 2.99881500  | 0.93385500  |
| H   | -9.30119200 | -1.76796000 | 0.43091700  | H | -5.56460200  | 3.08868800  | 0.88151100  |
| H   | -4.10622900 | -2.78355300 | 1.22389500  | O | -6.43472000  | 3.08818000  | -0.92203000 |
| H   | -2.61657600 | -3.05698700 | 0.31185000  | H | -7.22229600  | 2.77357000  | -1.34869100 |
| O   | -4.14436900 | -2.19530300 | -0.74596000 | O | -4.42998200  | -1.64998400 | -1.02927500 |
| H   | -5.16026700 | 4.29025800  | -0.54680300 | H | -3.53415800  | -1.38166300 | -0.86111200 |
| H   | -4.71179800 | -0.11685400 | 0.20547900  | C | -10.13877800 | -0.93635600 | 0.48270400  |
| H   | -3.12053800 | 1.58100400  | 2.09908700  | C | -10.30416900 | 0.00555600  | 1.48423600  |
| O   | -0.36275600 | 0.82220900  | -0.63804900 | C | -11.20213700 | -1.74221100 | 0.09827200  |
| H   | -4.55386700 | -2.49597700 | -3.18101700 | C | -11.53857800 | 0.12107600  | 2.10951000  |
| O   | -4.56621600 | 2.40868200  | 1.02651200  | H | -9.49765900  | 0.65349700  | 1.76435000  |
| H   | -6.44591100 | -1.70976600 | 0.43138900  | C | -12.42695800 | -1.60871700 | 0.72194000  |
| H   | -1.00078300 | 0.61591100  | 1.28159400  | H | -11.04806100 | -2.46306300 | -0.68303900 |
| B11 |             |             |             | C | -12.60287400 | -0.67787900 | 1.73676000  |
| C   | -1.07246100 | 2.60763500  | -1.62171700 | H | -11.66166300 | 0.85145100  | 2.88929100  |
| C   | -2.28911700 | 2.53190800  | -0.68214300 | H | -13.24550600 | -2.23721200 | 0.41940000  |
| C   | -3.05149600 | 1.22707100  | -0.91568100 | H | -13.55543600 | -0.57802800 | 2.22438400  |
| C   | -1.14599800 | 0.09608600  | -1.77097100 | H | 0.19215500   | 1.25750800  | -0.57880700 |
| C   | -0.25983700 | 1.31751700  | -1.55276800 | N | -6.77024200  | -2.97226400 | -0.05512400 |
| H   | -1.94628300 | 2.53555500  | 0.34617300  | H | -6.79127600  | -3.59130400 | -0.83127900 |
| H   | -1.43865200 | 2.72643300  | -2.64059200 | C | -6.52468400  | -5.01395600 | 1.22494200  |
| H   | -1.57336900 | 0.12764600  | -2.77190200 | H | -5.52952400  | -5.35344000 | 0.95428100  |
| H   | -3.48896200 | 1.22893500  | -1.91303700 | H | -6.73572400  | -5.33369600 | 2.23482800  |
| O   | -2.18898400 | 0.13305100  | -0.80904600 | H | -7.23576900  | -5.46460800 | 0.54213000  |
| O   | -0.20835200 | 3.65751000  | -1.31552900 | N | -3.21782900  | 3.63891000  | -0.87846100 |
| C   | -0.43344100 | -1.23410300 | -1.59797700 | H | -4.13266700  | 3.42882200  | -1.21562800 |
| H   | 0.32384000  | -1.33770100 | -2.35638800 | C | -4.15328000  | 5.85262000  | -0.49754600 |
| H   | -1.15861300 | -2.03542700 | -1.71823300 | H | -4.32212600  | 6.32484900  | 0.46184600  |
| H   | -0.62646600 | 4.28882300  | -0.73561700 | H | -3.83568600  | 6.62419000  | -1.19000600 |
| O   | 0.21965200  | -1.33979300 | -0.36151400 | H | -5.07187800  | 5.40806000  | -0.85494100 |

|   |             |             |             |     |             |             |             |
|---|-------------|-------------|-------------|-----|-------------|-------------|-------------|
| C | -3.02272700 | 4.86204700  | -0.34697800 | O   | 8.66552100  | 3.22945000  | 2.01742400  |
| O | -1.99092200 | 5.17418100  | 0.20078900  | H   | 8.64057800  | 3.74545800  | 1.22087600  |
| C | -6.56253700 | -3.50265200 | 1.17283200  | H   | 4.22232900  | 0.73464000  | 1.21667700  |
| O | -6.40680500 | -2.82582000 | 2.15581000  | C   | 8.52330600  | 0.52990400  | 0.70245000  |
| C | 6.27292000  | 3.26200300  | 2.27058100  | H   | 9.46354000  | 1.06878200  | 0.71480500  |
| C | 5.02372500  | 2.39154500  | 2.29082100  | C   | 4.03892500  | -1.78280500 | -2.78621900 |
| C | 4.99881900  | 1.46337400  | 1.08331700  | O   | 8.35753300  | -0.14116700 | -0.51654700 |
| C | 7.37599700  | 1.50349800  | 0.87085200  | H   | 8.60599200  | -1.05657300 | -0.41854200 |
| C | 7.52213500  | 2.40910100  | 2.09141200  | H   | 8.52214100  | -0.16680900 | 1.53527900  |
| H | 6.19992400  | 3.95875000  | 1.43764000  | H   | 7.86968200  | -3.54055100 | -1.61991400 |
| H | 7.31326900  | 2.11323500  | -0.02654900 | H   | 7.64732500  | -4.69394400 | -0.31957600 |
| H | 7.65597900  | 1.80093100  | 2.97522100  | O   | 8.54518700  | -2.90369200 | 0.16097400  |
| O | 6.19558000  | 0.73648300  | 0.99245100  | H   | 8.28355200  | -2.90000000 | 1.07495100  |
| C | 4.15858700  | 1.72651700  | -1.19653200 | H   | 5.07366700  | -1.98498400 | -3.02717900 |
| C | 2.63602500  | 1.71432200  | -1.03074400 | H   | 3.40388300  | -2.21825700 | -3.55161000 |
| C | 4.67988200  | 0.35246100  | -1.62125500 | O   | 3.70243900  | -2.30782900 | -1.52730200 |
| C | 2.06126700  | 1.25670600  | -2.37150600 | H   | 4.13945600  | 3.01881200  | 2.26206100  |
| H | 2.28709000  | 2.70849600  | -0.79002000 | H   | 4.65110900  | -0.30096700 | -0.76609800 |
| C | 3.81354300  | -0.28273000 | -2.72552300 | H   | 4.41618200  | 2.43510500  | -1.97418000 |
| H | 4.11285300  | 0.15458800  | -3.67557800 | O   | 0.70402300  | 1.36447000  | -2.57647200 |
| O | 2.43306900  | -0.08300100 | -2.53535400 | H   | 2.38455300  | -3.61530500 | 0.11441600  |
| C | 7.60116900  | -3.64066100 | -0.57806400 | O   | 4.79871900  | 2.24491900  | -0.04434300 |
| C | 6.17835000  | -3.12931100 | -0.37898200 | H   | 6.15462000  | -2.07277300 | -0.62180800 |
| C | 5.67805700  | -3.32653700 | 1.05522000  | H   | 2.50671200  | 1.84697500  | -3.16562500 |
| C | 4.01854600  | -3.62679900 | -1.25424500 | B12 |             |             |             |
| C | 4.17578400  | -3.10885100 | 1.17643700  | C   | -1.34192300 | -1.93952900 | -1.08785000 |
| H | 5.89085300  | -4.34068600 | 1.36562800  | C   | -2.80589600 | -1.71293800 | -1.51587400 |
| C | 3.42734900  | -3.91405500 | 0.12005200  | C   | -3.52293100 | -0.81912800 | -0.50273400 |
| H | 3.60125400  | -4.29724200 | -1.99416600 | C   | -1.52323100 | 0.18606900  | 0.28478500  |
| H | 3.95099300  | -2.05547000 | 1.03673900  | C   | -0.66373100 | -0.63722900 | -0.66320600 |
| O | 5.38997300  | -3.85670500 | -1.28829700 | H   | -2.82127400 | -1.20783300 | -2.47510100 |
| O | 6.37700800  | -2.49606400 | 1.96176600  | H   | -1.34303700 | -2.60989300 | -0.22995800 |
| H | 6.22936400  | -1.57716400 | 1.75230300  | H   | -1.61945400 | -0.33678900 | 1.23437400  |
| O | 3.71352300  | -3.53714100 | 2.43009200  | H   | -3.61706400 | -1.34119300 | 0.44833800  |
| H | 4.24871300  | -3.14178400 | 3.10705800  | O   | -2.80402800 | 0.35935600  | -0.29698900 |
| O | 3.55579900  | -5.28526000 | 0.35718100  | O   | -0.55340500 | -2.46285700 | -2.11173100 |
| H | 3.32738000  | -5.44525500 | 1.26455100  | C   | -0.97012600 | 1.57882300  | 0.53975200  |
| O | 5.97061100  | 0.42763200  | -2.15030800 | H   | 0.01368000  | 1.50363000  | 0.97510900  |
| H | 6.63958700  | 0.26376900  | -1.49219200 | H   | -1.62055000 | 2.09018900  | 1.24618000  |
| O | 2.26114400  | 0.86403600  | 0.02347900  | H   | -1.07084900 | -3.01834100 | -2.69067100 |
| H | 2.03005700  | -0.00257300 | -0.29974800 | O   | -0.84155300 | 2.31583300  | -0.64300800 |
| O | 5.01693400  | 1.57540500  | 3.42763500  | H   | -1.69365100 | 2.39549200  | -1.05144900 |
| H | 5.16408100  | 2.12988700  | 4.18401400  | C   | -5.98383500 | 1.04499800  | 0.46679400  |
| O | 6.31686900  | 3.96250100  | 3.48529200  | C   | -7.27467300 | 1.16261100  | 1.28728500  |
| H | 7.18217900  | 4.33886000  | 3.58865800  | C   | -5.84890000 | -0.36614500 | -0.09384600 |

|   |              |             |             |   |            |             |             |
|---|--------------|-------------|-------------|---|------------|-------------|-------------|
| H | -6.01084900  | 1.74157500  | -0.36258700 | C | 5.81604400 | 4.15119100  | -1.65924900 |
| C | -8.49115300  | 0.57072600  | 0.56958600  | C | 5.08120400 | 3.58460800  | -0.45179200 |
| H | -7.13890100  | 0.56395500  | 2.17911300  | C | 5.12929500 | 2.06207900  | -0.46106400 |
| C | -7.12225200  | -0.73501400 | -0.84625600 | C | 7.13336300 | 2.02718500  | -1.75339900 |
| H | -5.72147400  | -1.06159000 | 0.72725700  | C | 7.21177400 | 3.55158600  | -1.77238600 |
| H | -8.81219000  | 1.20162700  | -0.24727700 | H | 5.25380000 | 3.90447300  | -2.55802600 |
| H | -7.30069800  | -0.01385700 | -1.64256800 | H | 6.58950200 | 1.68277000  | -2.62899800 |
| O | -8.17878200  | -0.70621500 | 0.08200300  | H | 7.80493900 | 3.89128700  | -0.93475400 |
| O | -9.48891000  | 0.43782300  | 1.50980200  | O | 6.45035300 | 1.60731900  | -0.58944400 |
| O | -4.76617500  | -0.49027700 | -0.99024300 | C | 3.68888400 | 0.36350900  | -1.45283900 |
| C | -7.08865700  | -2.12064700 | -1.46140000 | C | 2.38482900 | 0.45827500  | -0.66061100 |
| H | -8.07534400  | -2.35616600 | -1.84668200 | C | 4.57825700 | -0.77490300 | -0.95066900 |
| H | -6.38849400  | -2.13436700 | -2.28188900 | C | 1.71262500 | -0.91147500 | -0.69727700 |
| O | -6.66271100  | -3.10243000 | -0.55062800 | H | 1.75270900 | 1.21437200  | -1.10814400 |
| H | -7.29262400  | -3.16196800 | 0.15722800  | C | 3.76749700 | -2.05452700 | -0.68212700 |
| O | -4.93609400  | 1.35780000  | 1.34025500  | H | 3.57070100 | -2.53675800 | -1.63686400 |
| H | -4.12533300  | 1.38183600  | 0.84588500  | O | 2.54873700 | -1.79833500 | -0.02657300 |
| C | -10.79530600 | 0.35670000  | 1.13292600  | C | 9.06349600 | -2.30701000 | 0.74814300  |
| C | -11.21681600 | -0.04722000 | -0.12274400 | C | 7.69039500 | -1.87775900 | 1.25483100  |
| C | -11.72480500 | 0.69299900  | 2.10797500  | C | 7.77914700 | -0.89516200 | 2.42692300  |
| C | -12.57680400 | -0.09426400 | -0.39899100 | C | 5.79630400 | -2.94884600 | 2.23226000  |
| H | -10.50659500 | -0.33966700 | -0.87030200 | C | 6.44304900 | -0.72121100 | 3.13588200  |
| C | -13.07441000 | 0.63127400  | 1.82203600  | H | 8.49001600 | -1.27176300 | 3.15007600  |
| H | -11.37148200 | 1.00035600  | 3.07467000  | C | 5.83895400 | -2.07718100 | 3.48089500  |
| C | -13.51052500 | 0.24110100  | 0.56313500  | H | 5.50601700 | -3.95975500 | 2.48648900  |
| H | -12.89982500 | -0.40518800 | -1.37655400 | H | 5.75745000 | -0.18709400 | 2.48400000  |
| H | -13.78836200 | 0.89421300  | 2.58208000  | O | 7.05159600 | -3.06822300 | 1.64579400  |
| H | -14.56108600 | 0.19767800  | 0.34055900  | O | 8.28638400 | 0.35782200  | 2.01131800  |
| H | -0.47446400  | -0.04855700 | -1.55208300 | H | 7.70686600 | 0.75151700  | 1.36409600  |
| N | -7.51800200  | 2.51625900  | 1.74022800  | O | 6.60729000 | -0.01998500 | 4.33967700  |
| H | -7.33442800  | 2.70243900  | 2.69821100  | H | 7.10388100 | 0.77104800  | 4.16994300  |
| C | -7.76934500  | 4.92100100  | 1.59729400  | O | 6.61524600 | -2.73921000 | 4.43441300  |
| H | -6.75634800  | 5.27806500  | 1.75606100  | H | 6.76391100 | -2.14023700 | 5.15575100  |
| H | -8.28429100  | 5.61778700  | 0.95237400  | O | 5.54683700 | -1.13134600 | -1.89106300 |
| H | -8.26839300  | 4.87437800  | 2.55841300  | H | 6.35417100 | -0.63709100 | -1.78447900 |
| N | -3.56555900  | -2.95766500 | -1.60688400 | O | 2.60190100 | 0.83843200  | 0.67445800  |
| H | -4.37399900  | -3.04611800 | -1.02950900 | H | 2.68038000 | 0.05203500  | 1.20323100  |
| C | -4.43590500  | -4.98160000 | -2.63801800 | O | 5.69901500 | 4.00054500  | 0.73301000  |
| H | -4.84411200  | -5.05520600 | -3.63817500 | H | 5.79663000 | 4.94399600  | 0.69359500  |
| H | -3.89860000  | -5.90155400 | -2.43714000 | O | 5.88166200 | 5.54305800  | -1.49647900 |
| H | -5.23828900  | -4.87105900 | -1.92209200 | H | 6.51538600 | 5.89169900  | -2.11127800 |
| C | -3.44266300  | -3.84328200 | -2.61526300 | O | 7.86067200 | 4.04286400  | -2.92268300 |
| O | -2.57431800  | -3.76451600 | -3.45326800 | H | 7.42500800 | 3.71898800  | -3.70159000 |
| C | -7.71728600  | 3.57137000  | 0.91616600  | H | 4.78329300 | 1.69701700  | 0.48769200  |
| O | -7.83404500  | 3.45251900  | -0.27592200 | C | 8.48631100 | 1.34827400  | -1.74474000 |

|    |             |             |             |   |              |             |             |
|----|-------------|-------------|-------------|---|--------------|-------------|-------------|
| H  | 9.09278800  | 1.73208600  | -2.55697300 | H | -2.90615700  | 0.95847600  | -0.37622300 |
| C  | 4.54927900  | -3.01903800 | 0.19137300  | H | -6.85891100  | 0.80544700  | -0.31916900 |
| O  | 8.28103800  | -0.02968600 | -1.89052400 | H | -5.39467900  | 1.58362000  | -1.98888400 |
| H  | 8.91470400  | -0.51234000 | -1.36622700 | O | -5.20758100  | -0.18809500 | -0.96524500 |
| H  | 8.99153800  | 1.57335400  | -0.81015100 | O | -6.55874700  | -0.94298100 | 0.66942400  |
| H  | 8.93727000  | -3.04039300 | -0.03513000 | O | -3.15234400  | 2.77779900  | -1.33508200 |
| H  | 9.61735300  | -2.77216900 | 1.55757600  | C | -3.99963800  | 0.29603300  | -2.92115600 |
| O  | 9.79297700  | -1.23819200 | 0.19476400  | H | -4.80542900  | -0.11810300 | -3.52136600 |
| H  | 9.84159100  | -0.53514500 | 0.83260200  | H | -3.51805200  | 1.07601500  | -3.48563100 |
| H  | 5.44349500  | -3.33254700 | -0.32892600 | O | -3.03992400  | -0.68162000 | -2.65331100 |
| H  | 3.93714600  | -3.88800600 | 0.40918900  | H | -3.43260900  | -1.49881800 | -2.36637600 |
| O  | 4.87571400  | -2.35304700 | 1.38783300  | O | -3.61959100  | 2.69574200  | 1.41618600  |
| H  | 4.04271800  | 3.89632000  | -0.47447700 | H | -4.15571800  | 3.17313200  | 2.04767600  |
| H  | 5.03325800  | -0.47534000 | -0.02094400 | C | -7.60420300  | -1.62431500 | 0.11241600  |
| H  | 3.43943500  | 0.14877000  | -2.48552300 | C | -7.98910900  | -1.50644000 | -1.21197400 |
| O  | 0.52817000  | -0.92054300 | 0.02085200  | C | -8.28510100  | -2.47903500 | 0.96825200  |
| H  | 4.82384400  | -1.93810300 | 3.83886200  | C | -9.07608900  | -2.24092500 | -1.66761500 |
| O  | 4.34534400  | 1.61761000  | -1.51386700 | H | -7.44457800  | -0.87861300 | -1.88829300 |
| H  | 7.14935900  | -1.41187600 | 0.43918100  | C | -9.35880700  | -3.20969200 | 0.49805300  |
| H  | 1.54360600  | -1.24572500 | -1.71333600 | H | -7.95973000  | -2.56141100 | 1.98903800  |
| C1 |             |             |             | C | -9.76532600  | -3.09121600 | -0.82379100 |
| C  | 0.58071300  | 2.87987800  | -0.76969900 | H | -9.37324800  | -2.14721300 | -2.69674800 |
| C  | -0.89828300 | 2.94061400  | -0.36328100 | H | -9.88164000  | -3.87046600 | 1.16599200  |
| C  | -1.79506000 | 2.88037800  | -1.61510800 | H | -10.60236500 | -3.65816200 | -1.18802700 |
| C  | -0.09918900 | 1.79066900  | -2.88266900 | H | 0.52308400   | 0.75673000  | -1.12030800 |
| C  | 0.78918000  | 1.65389100  | -1.65193900 | N | -6.23567200  | 1.31114700  | 2.17951300  |
| H  | -1.08641900 | 2.06606800  | 0.24823000  | H | -6.76545100  | 0.52423700  | 2.48017200  |
| H  | 0.84569900  | 3.75870800  | -1.34605500 | C | -7.51642300  | 2.38313000  | 3.92393400  |
| H  | 0.13921700  | 2.72213800  | -3.39688200 | H | -7.03651900  | 2.33919400  | 4.89562200  |
| H  | -1.70219900 | 3.81993100  | -2.15008400 | H | -8.09541600  | 3.29546800  | 3.88178800  |
| O  | -1.44010500 | 1.82322400  | -2.44172300 | H | -8.17523100  | 1.53032600  | 3.81910600  |
| O  | 1.41839500  | 2.77745000  | 0.34130300  | N | -1.29496600  | 4.10513500  | 0.41464700  |
| C  | 0.01907400  | 0.65748600  | -3.88666000 | H | -2.21741000  | 4.00360700  | 0.77835000  |
| H  | 1.02706500  | 0.64515400  | -4.27963300 | C | -1.35457100  | 6.16072000  | 1.67326500  |
| H  | -0.65453900 | 0.86835300  | -4.71498300 | H | -0.91608500  | 6.18504400  | 2.66408500  |
| H  | 1.48769100  | 3.65665000  | 0.70557700  | H | -1.22651600  | 7.14229300  | 1.23447900  |
| O  | -0.23471800 | -0.59264500 | -3.33454000 | H | -2.41078900  | 5.93910700  | 1.75620200  |
| H  | -1.15918100 | -0.64704000 | -3.10695000 | C | -0.58456900  | 5.16083500  | 0.83593800  |
| C  | -4.50001700 | 2.12405400  | 0.49999700  | O | 0.58859900   | 5.35493600  | 0.59975600  |
| C  | -5.26990700 | 0.95781900  | 1.13751700  | C | -6.43872400  | 2.45108900  | 2.86351500  |
| C  | -3.68208200 | 1.63338000  | -0.70556300 | O | -5.82657000  | 3.48109900  | 2.69304000  |
| H  | -5.19767800 | 2.87276300  | 0.13640600  | C | 9.34213000   | 0.53820900  | -0.25234600 |
| C  | -6.04811300 | 0.19280700  | 0.06855900  | C | 8.17931300   | 1.46014400  | 0.10971500  |
| H  | -4.53932700 | 0.27987300  | 1.56023100  | C | 6.90270700   | 0.65599400  | 0.33598500  |
| C  | -4.61666200 | 0.89070800  | -1.66782400 | C | 8.14088700   | -1.29172600 | 0.94481600  |

|   |             |             |             |    |             |             |             |
|---|-------------|-------------|-------------|----|-------------|-------------|-------------|
| C | 9.47800900  | -0.58850700 | 0.76786500  | H  | 8.54547200  | -1.91282400 | 2.96581000  |
| H | 9.16636700  | 0.09852200  | -1.22505700 | H  | -1.69405600 | -3.18015000 | 3.49842500  |
| H | 7.85997300  | -1.76294900 | 0.01284500  | H  | -1.77224300 | -1.43177100 | 3.33282000  |
| H | 9.77588000  | -0.15618100 | 1.72356100  | O  | 0.02741100  | -2.12380900 | 3.87897000  |
| O | 7.16052900  | -0.33129600 | 1.30296900  | H  | 0.60393200  | -2.84965100 | 3.67979800  |
| C | 5.19949200  | -0.23655500 | -1.18009400 | H  | 2.17378200  | -1.82913100 | 1.21079400  |
| C | 4.30819200  | 0.98495100  | -1.39938800 | H  | 2.93571000  | -3.26568300 | 0.51852000  |
| C | 4.55519400  | -1.23354900 | -0.21094000 | O  | 1.13531100  | -2.73723100 | -0.30891400 |
| C | 2.93082100  | 0.49956000  | -1.84088500 | H  | 8.02049200  | 2.18153400  | -0.67849800 |
| H | 4.73810300  | 1.60205100  | -2.18468100 | H  | 4.52303100  | -0.81293900 | 0.78712600  |
| C | 3.12249900  | -1.51674600 | -0.68549900 | H  | 5.29284800  | -0.75206300 | -2.12912200 |
| H | 3.17715400  | -2.05137100 | -1.63110600 | O  | 2.14506500  | 1.62999500  | -2.01892200 |
| O | 2.40426700  | -0.32347500 | -0.85895800 | H  | -0.37640700 | -4.22461400 | -1.69862000 |
| C | -1.15398100 | -2.29909300 | 3.15470600  | O  | 6.53551800  | 0.11153800  | -0.88001400 |
| C | -0.87522100 | -2.42914300 | 1.66873400  | H  | -0.37071500 | -1.53603100 | 1.32227800  |
| C | -2.12390800 | -2.66522100 | 0.82856600  | H  | 2.99290100  | -0.05014700 | -2.77822800 |
| C | 0.45733100  | -3.79854600 | 0.23165500  | C2 |             |             |             |
| C | -1.73452600 | -2.96177800 | -0.61522100 | C  | 0.62096100  | 2.88679600  | -0.79047500 |
| H | -2.65946600 | -3.52504600 | 1.23121400  | C  | -0.86139700 | 2.95372700  | -0.39643400 |
| C | -0.72372000 | -4.10160800 | -0.68345900 | C  | -1.74822400 | 2.87593000  | -1.65448400 |
| H | 1.09612100  | -4.66983400 | 0.32553400  | C  | -0.04336600 | 1.76884700  | -2.89413900 |
| H | -1.30033900 | -2.07357300 | -1.04851700 | C  | 0.83553800  | 1.64934200  | -1.65497000 |
| O | -0.01066800 | -3.55052000 | 1.52866000  | H  | -1.05412000 | 2.08802500  | 0.22622300  |
| O | -2.93695600 | -1.52922400 | 0.90481100  | H  | 0.89096300  | 3.75813200  | -1.37585300 |
| H | -3.63776500 | -1.61022500 | 0.26747000  | H  | 0.19849100  | 2.69304200  | -3.41970800 |
| O | -2.88905100 | -3.25737800 | -1.36741500 | H  | -1.65125400 | 3.80798300  | -2.20160600 |
| H | -3.10013300 | -4.17663600 | -1.24726300 | O  | -1.38751100 | 1.80734300  | -2.46323100 |
| O | -1.33664500 | -5.31597700 | -0.31343100 | O  | 1.44991400  | 2.79753100  | 0.32809200  |
| H | -1.32275100 | -5.40170700 | 0.63169200  | C  | 0.08173600  | 0.62149700  | -3.88120500 |
| O | 5.23889200  | -2.45463700 | -0.23410100 | H  | 1.09195400  | 0.60459500  | -4.26824400 |
| H | 5.75010500  | -2.58573500 | 0.55669800  | H  | -0.58724200 | 0.82002100  | -4.71631100 |
| O | 4.19847200  | 1.70843900  | -0.21115100 | H  | 1.51714700  | 3.68108700  | 0.68197400  |
| H | 3.33712300  | 2.11805300  | -0.14848900 | O  | -0.17410100 | -0.62090000 | -3.31275900 |
| O | 8.50402700  | 2.19542200  | 1.26882300  | H  | -1.09983000 | -0.67252500 | -3.08970700 |
| H | 8.26175500  | 1.69457700  | 2.03737900  | C  | -4.47408100 | 2.15056700  | 0.44562000  |
| O | 10.54905000 | 1.24837400  | -0.34064100 | C  | -5.24285400 | 0.99036500  | 1.09453000  |
| H | 10.55795800 | 1.89454800  | 0.35642700  | C  | -3.64488100 | 1.64274400  | -0.74457700 |
| O | 10.42462500 | -1.53231400 | 0.35876800  | H  | -5.17145300 | 2.89052500  | 0.06469600  |
| H | 11.20150900 | -1.06638500 | 0.07380900  | C  | -6.00914100 | 0.20084200  | 0.03494400  |
| H | 6.13274900  | 1.27869600  | 0.75323000  | H  | -4.50833700 | 0.32411800  | 1.52907300  |
| C | 8.13366000  | -2.33113800 | 2.05141300  | C  | -4.57101400 | 0.88528000  | -1.70323900 |
| H | 8.73446000  | -3.18059200 | 1.76527600  | H  | -2.87237600 | 0.97145500  | -0.39847000 |
| C | 2.35536900  | -2.37876500 | 0.29420400  | H  | -6.82785900 | 0.79671000  | -0.36190400 |
| O | 6.82469700  | -2.79889200 | 2.28033900  | H  | -5.34872900 | 1.57172100  | -2.03852700 |
| H | 6.34032200  | -2.10073700 | 2.70163400  | O  | -5.16263300 | -0.18638700 | -0.99052600 |

|   |              |             |             |   |             |             |             |
|---|--------------|-------------|-------------|---|-------------|-------------|-------------|
| O | -6.50434700  | -0.93321000 | 0.65329900  | O | 7.18362700  | -0.35980200 | 1.34991100  |
| O | -3.10827400  | 2.77737000  | -1.38434300 | C | 5.23364500  | -0.25745400 | -1.14232400 |
| C | -3.94269400  | 0.27524400  | -2.94333300 | C | 4.35120900  | 0.96814100  | -1.37480100 |
| H | -4.74289900  | -0.14823800 | -3.54463200 | C | 4.57869700  | -1.24682800 | -0.17211000 |
| H | -3.45736500  | 1.04811500  | -3.51433500 | C | 2.97337300  | 0.48742600  | -1.81914600 |
| O | -2.98460400  | -0.69702200 | -2.65315800 | H | 4.78925500  | 1.57671600  | -2.16223200 |
| H | -3.37960300  | -1.50506100 | -2.34363700 | C | 3.14529700  | -1.52135800 | -0.64924800 |
| O | -3.60359600  | 2.73835700  | 1.36051100  | H | 3.19840200  | -2.06188600 | -1.59163900 |
| H | -4.14551300  | 3.22709600  | 1.97802200  | O | 2.43799400  | -0.32334500 | -0.83220000 |
| C | -7.54705300  | -1.63159400 | 0.11060300  | C | -1.15242100 | -2.51543300 | 3.23853900  |
| C | -7.92753400  | -1.54677900 | -1.21751800 | C | -0.86566100 | -2.55212100 | 1.74190800  |
| C | -8.22718600  | -2.46791500 | 0.98468600  | C | -2.11218100 | -2.77193100 | 0.88696700  |
| C | -9.01017700  | -2.29604900 | -1.65899000 | C | 0.47940300  | -3.80557500 | 0.21998300  |
| H | -7.38262900  | -0.93303100 | -1.90640400 | C | -1.73036300 | -2.96601500 | -0.57388300 |
| C | -9.29649800  | -3.21398500 | 0.52849100  | H | -2.61481900 | -3.67153400 | 1.23999700  |
| H | -7.90528800  | -2.52450100 | 2.00834600  | C | -0.69558200 | -4.07736600 | -0.71274800 |
| C | -9.69885300  | -3.12863800 | -0.79709200 | H | 1.13420100  | -4.66866000 | 0.26222900  |
| H | -9.30433600  | -2.22822600 | -2.69099000 | H | -1.32080300 | -2.04376800 | -0.95735500 |
| H | -9.81910200  | -3.86057500 | 1.21030100  | O | 0.01524500  | -3.64147400 | 1.53013900  |
| H | -10.53250500 | -3.70737400 | -1.15035800 | O | -2.97468000 | -1.67313800 | 1.03726500  |
| H | 0.56525000   | 0.75959200  | -1.11308100 | H | -3.68342200 | -1.74897200 | 0.40732500  |
| N | -6.21194800  | 1.35077800  | 2.12938900  | O | -2.88639400 | -3.24490700 | -1.33061000 |
| H | -6.73156300  | 0.56369800  | 2.44703500  | H | -3.06362400 | -4.17768300 | -1.27683000 |
| C | -7.50319700  | 2.44153900  | 3.85391300  | O | -1.28517600 | -5.32358500 | -0.41799200 |
| H | -7.01878800  | 2.38233300  | 4.82273400  | H | -1.24825700 | -5.47835800 | 0.51778500  |
| H | -8.07111700  | 3.36096700  | 3.82208200  | O | 5.25330400  | -2.47299100 | -0.18985800 |
| H | -8.17215500  | 1.59708300  | 3.74521000  | H | 5.76489300  | -2.60472100 | 0.60059900  |
| N | -1.26381400  | 4.12945600  | 0.36136900  | O | 4.23927400  | 1.70131000  | -0.19254000 |
| H | -2.18923000  | 4.03381700  | 0.71893600  | H | 3.38173000  | 2.12022300  | -0.14117200 |
| C | -1.33063100  | 6.19877400  | 1.59692500  | O | 8.53119900  | 2.16410000  | 1.32490600  |
| H | -0.90975000  | 6.22251700  | 2.59543300  | H | 8.28643500  | 1.66142600  | 2.09146600  |
| H | -1.18589200  | 7.17747500  | 1.15711200  | O | 10.58124100 | 1.21638200  | -0.27844000 |
| H | -2.39005400  | 5.98671800  | 1.66214100  | H | 10.58880900 | 1.86114000  | 0.41994900  |
| C | -0.55510800  | 5.18872600  | 0.77713400  | O | 10.44900600 | -1.56543700 | 0.41570400  |
| O | 0.62038200   | 5.37804400  | 0.54920100  | H | 11.22799700 | -1.10062400 | 0.13472400  |
| C | -6.43058500  | 2.50364400  | 2.78825900  | H | 6.16040300  | 1.25217300  | 0.79672500  |
| O | -5.83328400  | 3.53729900  | 2.59206100  | C | 8.15138800  | -2.36217000 | 2.09986600  |
| C | 9.37277900   | 0.50814800  | -0.19594500 | H | 8.75334100  | -3.21129400 | 1.81516600  |
| C | 8.21014600   | 1.43144400  | 0.16310100  | C | 2.36676300  | -2.37073400 | 0.33281300  |
| C | 6.93153600   | 0.62871900  | 0.38265900  | O | 6.84161400  | -2.83013400 | 2.32271400  |
| C | 8.16375700   | -1.32161600 | 0.99447700  | H | 6.35652400  | -2.13520000 | 2.74830000  |
| C | 9.50275400   | -0.62046400 | 0.82294500  | H | 8.55962900  | -1.94498200 | 3.01640000  |
| H | 9.20003100   | 0.07035100  | -1.17002600 | H | -0.21051300 | -2.53433500 | 3.76918500  |
| H | 7.88525900   | -1.79164500 | 0.06115900  | H | -1.70713700 | -3.40949600 | 3.52052800  |
| H | 9.79820100   | -0.19018400 | 1.78032900  | O | -1.82115400 | -1.35372100 | 3.62588800  |



|    |             |             |             |   |              |             |             |
|----|-------------|-------------|-------------|---|--------------|-------------|-------------|
| H  | -2.56103900 | -1.21522900 | 3.04873000  | H | -3.07266600  | 0.80532600  | -3.56829000 |
| H  | 2.20053200  | -1.81943000 | 1.25131600  | O | -2.90310600  | -0.90424100 | -2.53825500 |
| H  | 2.93148600  | -3.26781900 | 0.55470800  | H | -3.42483400  | -1.63339000 | -2.22156500 |
| O  | 1.13626200  | -2.70352200 | -0.26326500 | O | -3.36252200  | 2.90406500  | 1.14893500  |
| H  | 8.05562300  | 2.15454900  | -0.62437900 | H | -3.87814900  | 3.51540900  | 1.67275300  |
| H  | 4.54695400  | -0.82312300 | 0.82470300  | C | -7.77996300  | -0.96718400 | -0.16475700 |
| H  | 5.33014700  | -0.77845400 | -2.08801400 | C | -8.02741600  | -0.93442900 | -1.52629100 |
| O  | 2.19442900  | 1.62030100  | -2.01018300 | C | -8.64492600  | -1.63605100 | 0.69029400  |
| H  | -0.34630600 | -4.12985000 | -1.73328700 | C | -9.16144800  | -1.56415900 | -2.02230100 |
| O  | 6.56940300  | 0.08559700  | -0.83539600 | H | -7.34430000  | -0.45343200 | -2.19717700 |
| H  | -0.39199600 | -1.62192400 | 1.45217700  | C | -9.76405800  | -2.26518600 | 0.18086500  |
| H  | 3.03667600  | -0.07110900 | -2.75116500 | H | -8.42489000  | -1.65643300 | 1.74187600  |
| C3 |             |             |             | C | -10.03291900 | -2.22881600 | -1.18037200 |
| C  | 1.01131400  | 2.25630600  | -0.66104000 | H | -9.35157700  | -1.53672300 | -3.08027100 |
| C  | -0.46951300 | 2.55277300  | -0.38253000 | H | -10.42983900 | -2.78197700 | 0.84853500  |
| C  | -1.26994200 | 2.53818100  | -1.70050600 | H | -10.90526600 | -2.71632700 | -1.57543000 |
| C  | 0.33509000  | 1.14558600  | -2.77116400 | H | 0.67689600   | 0.14873800  | -0.91873900 |
| C  | 1.10471400  | 0.96774200  | -1.46983400 | N | -6.20368600  | 1.96244000  | 1.76111500  |
| H  | -0.82741400 | 1.75531200  | 0.25833800  | H | -6.86176500  | 1.28662200  | 2.07808700  |
| H  | 1.44949300  | 3.05688400  | -1.24603100 | C | -7.47043700  | 3.36823700  | 3.26181100  |
| H  | 0.73663600  | 1.99847300  | -3.31855600 | H | -7.08761600  | 3.36379700  | 4.27662800  |
| H  | -0.99834000 | 3.41706500  | -2.27588400 | H | -7.91098400  | 4.33864700  | 3.07858800  |
| O  | -1.01439600 | 1.38917300  | -2.43623200 | H | -8.22984800  | 2.60196200  | 3.16995000  |
| O  | 1.73641700  | 2.08515100  | 0.51994800  | N | -0.74970800  | 3.81423600  | 0.28796900  |
| C  | 0.36401500  | -0.06281700 | -3.69057400 | H | -1.70924400  | 3.88248600  | 0.55009900  |
| H  | 1.38312300  | -0.22852500 | -4.01369300 | C | -0.60495000  | 5.91783000  | 1.45740500  |
| H  | -0.22868600 | 0.16823600  | -4.57341000 | H | -0.29313600  | 5.92060700  | 2.49538600  |
| H  | 1.89325600  | 2.96162500  | 0.86541000  | H | -0.25583300  | 6.83903200  | 1.00822700  |
| O  | -0.07755200 | -1.22943800 | -3.07517900 | H | -1.68565500  | 5.88120300  | 1.40976700  |
| H  | -1.01099800 | -1.15125800 | -2.89580900 | C | 0.07647300   | 4.75988300  | 0.75876200  |
| C  | -4.22963600 | 2.36447400  | 0.20124400  | O | 1.28466400   | 4.74570300  | 0.66384100  |
| C  | -5.20946400 | 1.38068500  | 0.85781100  | C | -6.30572600  | 3.18480400  | 2.31293600  |
| C  | -3.38545700 | 1.65207800  | -0.86823400 | O | -5.54440400  | 4.10328700  | 2.11004100  |
| H  | -4.77941500 | 3.15843600  | -0.29536700 | C | 9.09495100   | -0.40396400 | 1.17425400  |
| C  | -5.98933400 | 0.61920000  | -0.21209300 | C | 8.80276300   | -1.33310300 | -0.00102200 |
| H  | -4.62152500 | 0.65941900  | 1.41103400  | C | 7.50414600   | -0.93342600 | -0.69510300 |
| C  | -4.32841200 | 0.94731200  | -1.85127000 | C | 7.66876000   | 1.30973700  | 0.06251000  |
| H  | -2.74591600 | 0.91594200  | -0.40487800 | C | 9.00387200   | 1.06155000  | 0.75391000  |
| H  | -6.67010700 | 1.28924700  | -0.73222900 | H | 8.36615000   | -0.57127900 | 1.95712500  |
| H  | -4.97205000 | 1.70071400  | -2.30576900 | H | 6.87140700   | 1.10822700  | 0.76467900  |
| O  | -5.12177500 | 0.03026000  | -1.11838300 | H | 9.81131900   | 1.28052700  | 0.05417600  |
| O  | -6.70313800 | -0.37437500 | 0.43219000  | O | 7.56316500   | 0.41027400  | -1.03547100 |
| O  | -2.64473100 | 2.65055000  | -1.53218100 | C | 5.16636900   | -1.39260200 | -0.44448400 |
| C  | -3.69828800 | 0.15447400  | -2.98225500 | C | 4.49134700   | -0.09585800 | -0.90103500 |
| H  | -4.50199100 | -0.21422000 | -3.61398600 | C | 4.31605300   | -2.11406700 | 0.59421200  |

|   |             |             |             |    |             |             |             |
|---|-------------|-------------|-------------|----|-------------|-------------|-------------|
| C | 3.08094400  | -0.45322900 | -1.37077100 | H  | 8.74690500  | -2.35722200 | 0.34077400  |
| H | 5.03820200  | 0.34088200  | -1.72744900 | H  | 4.26444800  | -1.49580600 | 1.48428400  |
| C | 2.91044000  | -2.31715900 | 0.03623900  | H  | 5.26767000  | -2.04787300 | -1.30883300 |
| H | 2.96276600  | -2.97193800 | -0.83071700 | O  | 2.46555900  | 0.73369900  | -1.73296300 |
| O | 2.38618200  | -1.07077000 | -0.33947600 | H  | -0.82750700 | -4.65089500 | -0.99410400 |
| C | -1.72746600 | -2.08946600 | 3.53303000  | O  | 6.44045400  | -1.23240400 | 0.13894800  |
| C | -1.34908100 | -2.42513500 | 2.10238800  | H  | -0.70397300 | -1.64715200 | 1.71395100  |
| C | -2.54636000 | -2.60123200 | 1.17681900  | H  | 3.11882100  | -1.12278200 | -2.22807600 |
| C | -0.10177500 | -4.10915300 | 0.95101400  | C4 |             |             |             |
| C | -2.08514400 | -3.10916200 | -0.18464400 | C  | 1.03214800  | 2.21484200  | -0.68086600 |
| H | -3.22256600 | -3.33568700 | 1.61453600  | C  | -0.45208100 | 2.51160700  | -0.41858700 |
| C | -1.23553900 | -4.36687500 | -0.03532400 | C  | -1.23998300 | 2.47054300  | -1.74365300 |
| H | 0.40347800  | -5.03681200 | 1.19641700  | C  | 0.37395000  | 1.05905500  | -2.77382300 |
| H | -1.50137600 | -2.33848300 | -0.66508500 | C  | 1.13672700  | 0.91183400  | -1.46483100 |
| O | -0.63236400 | -3.65317100 | 2.16353900  | H  | -0.81218200 | 1.72456000  | 0.23405300  |
| O | -3.20347200 | -1.37230600 | 1.05726700  | H  | 1.47111900  | 3.00638500  | -1.27759200 |
| H | -3.85515100 | -1.43709300 | 0.36801600  | H  | 0.77614200  | 1.90090100  | -3.33752900 |
| O | -3.20319700 | -3.34225900 | -1.00970000 | H  | -0.96109100 | 3.33679900  | -2.33441100 |
| H | -3.54889000 | -4.20592900 | -0.81328900 | O  | -0.97816900 | 1.30610500  | -2.45217600 |
| O | -2.03403900 | -5.44341800 | 0.40074700  | O  | 1.75028700  | 2.06733600  | 0.50730400  |
| H | -2.11095200 | -5.41745700 | 1.34638600  | C  | 0.41161400  | -0.16937400 | -3.66605500 |
| O | 4.84859500  | -3.37484100 | 0.89029900  | H  | 1.43242400  | -0.33703300 | -3.98266700 |
| H | 5.73991600  | -3.25614400 | 1.19144500  | H  | -0.17964600 | 0.03897600  | -4.55551400 |
| O | 4.43659400  | 0.81728400  | 0.15845900  | H  | 1.89983900  | 2.95022100  | 0.83940200  |
| H | 3.55659900  | 1.18577800  | 0.23769900  | O  | -0.02536800 | -1.32459600 | -3.02617400 |
| O | 9.86407000  | -1.28219300 | -0.92711000 | H  | -0.95856600 | -1.24594700 | -2.84585300 |
| H | 9.74916300  | -0.52762400 | -1.49230800 | C  | -4.23428200 | 2.36372000  | 0.11480100  |
| O | 10.35281100 | -0.67465600 | 1.73292900  | C  | -5.23169200 | 1.40735700  | 0.78574900  |
| H | 10.95903000 | -0.84298200 | 1.02058700  | C  | -3.36959700 | 1.61319200  | -0.91159400 |
| O | 9.10150600  | 1.89735700  | 1.86961300  | H  | -4.77019200 | 3.14179100  | -0.42020000 |
| H | 9.84463200  | 1.61315900  | 2.38771600  | C  | -5.98369300 | 0.59437900  | -0.26571400 |
| H | 7.41467200  | -1.47082200 | -1.63193900 | H  | -4.65554100 | 0.71135900  | 1.38226400  |
| C | 7.49777200  | 2.71695400  | -0.48006100 | C  | -4.29424700 | 0.87068900  | -1.88393600 |
| H | 7.63548700  | 3.41673700  | 0.33845400  | H  | -2.73862400 | 0.89482900  | -0.40950200 |
| C | 1.96261800  | -2.94186300 | 1.03757800  | H  | -6.66116700 | 1.23456800  | -0.82595300 |
| O | 6.26137400  | 2.89571400  | -1.10246300 | H  | -4.93491300 | 1.60423600  | -2.37366200 |
| H | 5.57900700  | 2.49443400  | -0.57570600 | O  | -5.09323900 | -0.02346100 | -1.12863800 |
| H | 8.25765400  | 2.91725200  | -1.22626900 | O  | -6.69889600 | -0.37810000 | 0.40882900  |
| H | -2.40042200 | -2.85521200 | 3.91633700  | O  | -2.61680200 | 2.58889900  | -1.59411200 |
| H | -2.24390500 | -1.14138700 | 3.55754300  | C  | -3.64534900 | 0.04092000  | -2.97681100 |
| O | -0.59630700 | -1.96733700 | 4.34253900  | H  | -4.43902700 | -0.35567600 | -3.60436700 |
| H | -0.10193100 | -2.77409700 | 4.28298600  | H  | -3.01610000 | 0.67350300  | -3.57862400 |
| H | 1.79138500  | -2.26239600 | 1.86408100  | O  | -2.85037200 | -0.99542000 | -2.48325800 |
| H | 2.39692700  | -3.85944200 | 1.41702200  | H  | -3.37280100 | -1.71271800 | -2.14129400 |
| O | 0.75600100  | -3.21327400 | 0.36609800  | O  | -3.38510500 | 2.93052900  | 1.06241100  |

|   |              |             |             |   |             |             |             |
|---|--------------|-------------|-------------|---|-------------|-------------|-------------|
| H | -3.9066600   | 3.56351500  | 1.55355000  | O | 2.42759100  | -1.09496500 | -0.28714600 |
| C | -7.76112900  | -1.00597300 | -0.17977400 | C | -1.67085100 | -2.06703400 | 3.65765300  |
| C | -7.98156400  | -1.03920500 | -1.54583700 | C | -1.29267000 | -2.41804300 | 2.22332100  |
| C | -8.63844900  | -1.63939300 | 0.68931900  | C | -2.49647600 | -2.61335200 | 1.30380200  |
| C | -9.10176900  | -1.69952400 | -2.03335600 | C | -0.05673100 | -4.10226500 | 1.07099900  |
| H | -7.28810000  | -0.58562900 | -2.22518300 | C | -2.04843900 | -3.11720500 | -0.06147700 |
| C | -9.74349300  | -2.29981000 | 0.18860700  | H | -3.15332300 | -3.35699400 | 1.75333900  |
| H | -8.43929000  | -1.60840200 | 1.74480400  | C | -1.19174500 | -4.37003700 | 0.08863200  |
| C | -9.98554200  | -2.32968300 | -1.17777100 | H | 0.45263100  | -5.02664400 | 1.31945800  |
| H | -9.27124100  | -1.72351700 | -3.09489400 | H | -1.47476300 | -2.34554200 | -0.55234400 |
| H | -10.41919000 | -2.78905300 | 0.86694300  | O | -0.57883500 | -3.64102100 | 2.28362700  |
| H | -10.84695300 | -2.84141300 | -1.56610400 | O | -3.18961000 | -1.39733600 | 1.18756900  |
| H | 0.71110300   | 0.10122400  | -0.89972000 | H | -3.84835200 | -1.48010500 | 0.50618800  |
| N | -6.24637100  | 2.02373100  | 1.64042800  | O | -3.17644700 | -3.36116700 | -0.87013700 |
| H | -6.91388900  | 1.36196500  | 1.96748200  | H | -3.50602000 | -4.23124900 | -0.67349900 |
| C | -7.53614200  | 3.48419400  | 3.06696100  | O | -1.98576200 | -5.44746600 | 0.53080700  |
| H | -7.18063300  | 3.46557500  | 4.09170300  | H | -2.04161100 | -5.43245500 | 1.47826900  |
| H | -7.94248300  | 4.46730700  | 2.87408700  | O | 4.89681200  | -3.37479900 | 0.97325900  |
| H | -8.31466900  | 2.74024400  | 2.95334500  | H | 5.78754100  | -3.25033300 | 1.27375000  |
| N | -0.74117800  | 3.78445900  | 0.22592800  | O | 4.47109400  | 0.80480700  | 0.17176600  |
| H | -1.70334300  | 3.85634800  | 0.47769200  | H | 3.58996100  | 1.17193700  | 0.24323400  |
| C | -0.61213400  | 5.90359300  | 1.36805400  | O | 9.90476300  | -1.29796900 | -0.88495400 |
| H | -0.34588900  | 5.89229300  | 2.41883500  | H | 9.78676400  | -0.55394000 | -1.46333000 |
| H | -0.22882900  | 6.82205100  | 0.94236300  | O | 10.39524100 | -0.64180200 | 1.76322800  |
| H | -1.69031700  | 5.88457200  | 1.27471900  | H | 11.00098300 | -0.82120200 | 1.05318600  |
| C | 0.07875000   | 4.73919400  | 0.68983700  | O | 9.13613200  | 1.92832500  | 1.85607800  |
| O | 1.28772700   | 4.72652100  | 0.60609100  | H | 9.88096100  | 1.65578900  | 2.37799300  |
| C | -6.35348600  | 3.26569700  | 2.14849600  | H | 7.45487500  | -1.50653600 | -1.58277000 |
| O | -5.58294600  | 4.17206100  | 1.92976900  | C | 7.52725500  | 2.70135500  | -0.50582100 |
| C | 9.13581700   | -0.38495300 | 1.20158100  | H | 7.66441200  | 3.41604900  | 0.29979800  |
| C | 8.84488000   | -1.33567800 | 0.04338900  | C | 2.01081900  | -2.93764200 | 1.12915600  |
| C | 7.54408500   | -0.95230200 | -0.65577600 | O | 6.28931700  | 2.86563100  | -1.12921100 |
| C | 7.70301000   | 1.30451700  | 0.06148300  | H | 5.60883800  | 2.47273100  | -0.59379700 |
| C | 9.03971000   | 1.07259500  | 0.75545600  | H | 8.28530100  | 2.89032800  | -1.25682000 |
| H | 8.40857200   | -0.54058200 | 1.98830000  | H | -0.78379000 | -2.13390700 | 4.27217800  |
| H | 6.90717200   | 1.11328400  | 0.76825100  | H | -2.38649000 | -2.79843200 | 4.03127700  |
| H | 9.84562800   | 1.28160200  | 0.05093500  | O | -2.15775500 | -0.76529000 | 3.77725900  |
| O | 7.59858900   | 0.38534700  | -1.02012400 | H | -2.82423300 | -0.62026200 | 3.11828900  |
| C | 5.20798000   | -1.41348100 | -0.39344100 | H | 1.85355700  | -2.24528000 | 1.94757300  |
| C | 4.52856900   | -0.12693300 | -0.87159200 | H | 2.44145200  | -3.85227100 | 1.51904800  |
| C | 4.36175200   | -2.11962500 | 0.65907100  | O | 0.79562400  | -3.20834100 | 0.47371600  |
| C | 3.11872600   | -0.49711300 | -1.33220800 | H | 8.79258700  | -2.35372900 | 0.40337000  |
| H | 5.07302800   | 0.29714500  | -1.70610500 | H | 4.31278600  | -1.48724000 | 1.53935600  |
| C | 2.95388000   | -2.33367900 | 0.11069400  | H | 5.30975300  | -2.08317800 | -1.24658600 |
| H | 3.00251600   | -3.00521400 | -0.74358500 | O | 2.50033600  | 0.68121700  | -1.71611200 |

|    |             |             |             |   |             |             |             |
|----|-------------|-------------|-------------|---|-------------|-------------|-------------|
| H  | -0.78493900 | -4.65512000 | -0.87034600 | C | 10.62650200 | -1.22530200 | -2.34005000 |
| O  | 6.48252100  | -1.23946900 | 0.18505700  | H | 8.75410700  | -1.75951700 | -1.46126900 |
| H  | -0.66132800 | -1.63253600 | 1.82596000  | C | 11.06334000 | 1.11319500  | -2.55987900 |
| H  | 3.15648900  | -1.18377300 | -2.17587800 | H | 9.53322500  | 2.41325600  | -1.80633100 |
| C5 |             |             |             | C | 11.46096700 | -0.20304700 | -2.75019200 |
| C  | 0.12771400  | -1.74425700 | 1.22332100  | H | 10.91671600 | -2.24965700 | -2.49052300 |
| C  | 1.57864900  | -1.36501300 | 1.55013000  | H | 11.69881200 | 1.91998500  | -2.87815000 |
| C  | 2.50882100  | -2.46685700 | 1.01841100  | H | 12.40361300 | -0.42423800 | -3.21618000 |
| C  | 0.97831600  | -3.04403300 | -0.72210800 | H | 0.24734700  | -1.03320300 | -0.80221400 |
| C  | 0.01366100  | -1.94756000 | -0.28439900 | N | 6.98692500  | 1.55679600  | 1.48228300  |
| H  | 1.79677600  | -0.44186300 | 1.02601500  | H | 7.66226400  | 2.04843100  | 0.94157200  |
| H  | -0.12836600 | -2.67861300 | 1.70954500  | C | 7.97498200  | 2.86993300  | 3.25254800  |
| H  | 0.69613900  | -3.97791600 | -0.23745900 | H | 7.48004700  | 3.82232400  | 3.40843000  |
| H  | 2.32997700  | -3.37631500 | 1.58305700  | H | 8.36811200  | 2.54175800  | 4.20496500  |
| O  | 2.28784700  | -2.68367400 | -0.33412400 | H | 8.78900600  | 3.00778600  | 2.55218200  |
| O  | -0.77645400 | -0.75346600 | 1.60771700  | N | 1.88193200  | -1.13779500 | 2.95389800  |
| C  | 1.02014700  | -3.26746700 | -2.22481400 | H | 2.77764300  | -0.72004000 | 3.07291100  |
| H  | 0.03300400  | -3.54790800 | -2.56666000 | C | 1.80109500  | -0.94614300 | 5.35839800  |
| H  | 1.68974500  | -4.09921100 | -2.43110700 | H | 1.24781200  | -0.13762900 | 5.82114000  |
| H  | -0.89232200 | -0.85043100 | 2.55006400  | H | 1.73676900  | -1.80464000 | 6.01537700  |
| O  | 1.40524800  | -2.12640700 | -2.92386200 | H | 2.83790200  | -0.65398600 | 5.25082500  |
| H  | 2.33662500  | -1.98519000 | -2.78310400 | C | 1.12535000  | -1.29810300 | 4.04986100  |
| C  | 5.20238700  | -0.26017300 | 1.41201000  | O | -0.02146200 | -1.68823100 | 4.05149900  |
| C  | 6.15822400  | 0.67762400  | 0.65959500  | C | 6.94068300  | 1.86654100  | 2.79107100  |
| C  | 4.52952600  | -1.23441000 | 0.43555100  | O | 6.14398800  | 1.41543100  | 3.58203100  |
| H  | 5.76259900  | -0.84801100 | 2.13321600  | C | -8.42382900 | -0.87202000 | 0.16426300  |
| C  | 7.11048200  | -0.14367400 | -0.20671100 | C | -8.07772500 | -1.36890800 | -1.23695200 |
| H  | 5.56226500  | 1.28963800  | -0.00925100 | C | -6.63391900 | -1.85825300 | -1.29653100 |
| C  | 5.58405200  | -1.93360300 | -0.42893500 | C | -6.57831400 | -2.29846800 | 1.03355000  |
| H  | 3.84539900  | -0.69201100 | -0.20129100 | C | -8.03623200 | -1.89996300 | 1.22550000  |
| H  | 7.76687800  | -0.74233000 | 0.42137700  | H | -7.87845500 | 0.04052700  | 0.36813900  |
| H  | 6.19554000  | -2.55967600 | 0.21965000  | H | -5.96086700 | -1.41911900 | 1.15603200  |
| O  | 6.39314300  | -0.96182800 | -1.06158700 | H | -8.66355000 | -2.78459900 | 1.10888800  |
| O  | 7.85404900  | 0.74619700  | -0.95685600 | O | -6.42746600 | -2.79606500 | -0.29044100 |
| O  | 3.86239000  | -2.20852800 | 1.20344700  | C | -4.48091500 | -0.90588200 | -1.70188900 |
| C  | 5.04789200  | -2.79224700 | -1.56086600 | C | -3.54057400 | -1.71890500 | -0.80546400 |
| H  | 5.88878400  | -3.29628800 | -2.02906900 | C | -3.94637600 | 0.50587400  | -1.89774000 |
| H  | 4.36600300  | -3.53135200 | -1.18048100 | C | -2.13749900 | -1.64926800 | -1.40436100 |
| O  | 4.35372400  | -2.02874500 | -2.50964400 | H | -3.85534600 | -2.75430900 | -0.77337100 |
| H  | 4.94435200  | -1.37882000 | -2.86889200 | C | -2.49621300 | 0.45182300  | -2.37293300 |
| O  | 4.18976600  | 0.45280500  | 2.04988000  | H | -2.47993000 | 0.00815500  | -3.36903100 |
| H  | 4.59646800  | 0.91609300  | 2.78087600  | O | -1.72218600 | -0.32804800 | -1.49978800 |
| C  | 9.02639900  | 0.36332900  | -1.54575700 | C | -5.40518600 | 4.59883000  | -1.02664600 |
| C  | 9.40289300  | -0.95411200 | -1.74151400 | C | -4.05620100 | 4.12873800  | -0.52228300 |
| C  | 9.85337900  | 1.39889200  | -1.95847400 | C | -3.58332700 | 4.80151200  | 0.75732200  |

|   |              |             |             |    |             |             |             |
|---|--------------|-------------|-------------|----|-------------|-------------|-------------|
| C | -1.83663800  | 3.86946100  | -1.35247500 | C6 |             |             |             |
| C | -2.18847700  | 4.28865600  | 1.10615800  | C  | 0.10367500  | -0.28231400 | 0.05883800  |
| H | -3.53700900  | 5.87955300  | 0.59745200  | C  | 1.40240000  | 0.49842700  | -0.18515000 |
| C | -1.23839400  | 4.45395900  | -0.07697400 | C  | 2.54636300  | -0.51110400 | -0.23777000 |
| H | -1.25243600  | 4.20263200  | -2.20184300 | C  | 1.09945400  | -2.20501900 | -1.15799600 |
| H | -2.26642600  | 3.23951400  | 1.36115900  | C  | -0.09648300 | -1.25530200 | -1.10314600 |
| O | -3.11681300  | 4.39915200  | -1.55640800 | H  | 1.35733700  | 0.99016500  | -1.14739600 |
| O | -4.49413200  | 4.51047300  | 1.77443800  | H  | 0.20990900  | -0.86495500 | 0.96864700  |
| H | -4.09387700  | 4.73235600  | 2.60656500  | H  | 1.11974300  | -2.80842700 | -0.25268700 |
| O | -1.70167000  | 4.94684800  | 2.24437400  | H  | 2.62318200  | -1.04038100 | 0.70980600  |
| H | -1.31951400  | 5.77103100  | 1.96555900  | O  | 2.29354400  | -1.44533900 | -1.25651700 |
| O | -0.95106300  | 5.82228600  | -0.27139000 | O  | -0.99980200 | 0.53401400  | 0.30118700  |
| H | -1.65102200  | 6.22388300  | -0.77104300 | C  | 1.08262200  | -3.12680200 | -2.36494700 |
| O | -4.67496000  | 1.19190800  | -2.87557000 | H  | 0.19351000  | -3.73910300 | -2.33563800 |
| H | -5.38616400  | 1.67782000  | -2.47635600 | H  | 1.94719300  | -3.78472000 | -2.31615400 |
| O | -3.54136900  | -1.19538200 | 0.49410400  | H  | -1.17661500 | 1.10476300  | -0.43922400 |
| H | -2.64678700  | -1.03629700 | 0.79225600  | O  | 1.05711100  | -2.41894900 | -3.56962300 |
| O | -8.94473800  | -2.42229000 | -1.59663100 | H  | 1.83103800  | -1.87281000 | -3.61834800 |
| H | -8.61958300  | -3.23277500 | -1.22358200 | C  | 5.66508100  | -1.33358800 | -0.70588500 |
| O | -9.78753100  | -0.55781800 | 0.26841000  | C  | 7.00760400  | -1.65322400 | -0.03871100 |
| H | -10.27547900 | -1.21851100 | -0.20964800 | C  | 4.90467700  | -0.30804200 | 0.12430500  |
| O | -8.20158000  | -1.36663300 | 2.50712100  | H  | 5.83471100  | -0.91910300 | -1.69245900 |
| H | -9.05258300  | -0.94710900 | 2.54304300  | C  | 7.76515300  | -0.39153500 | 0.38775900  |
| H | -6.47177800  | -2.38786900 | -2.22800900 | H  | 6.78934800  | -2.19000400 | 0.87586500  |
| C | -6.08936900  | -3.37200800 | 1.98804800  | C  | 5.78865000  | 0.90674100  | 0.37566300  |
| H | -6.26993600  | -3.03414300 | 3.00382400  | H  | 4.65198900  | -0.74602800 | 1.08198000  |
| C | -1.85448100  | 1.81648100  | -2.50229300 | H  | 8.16829900  | 0.13234600  | -0.46770900 |
| O | -4.74241600  | -3.68265600 | 1.78667400  | H  | 6.10277900  | 1.33803700  | -0.57386100 |
| H | -4.24658700  | -2.88040400 | 1.66509400  | O  | 6.90972600  | 0.45981700  | 1.10034600  |
| H | -6.64988200  | -4.28615200 | 1.83164900  | O  | 8.77307300  | -0.79455300 | 1.23638200  |
| H | -5.36803600  | 5.66316600  | -1.24617100 | O  | 3.72946000  | 0.11983500  | -0.52675100 |
| H | -6.15502200  | 4.43096700  | -0.26886300 | C  | 5.11297800  | 1.99556800  | 1.18773900  |
| O | -5.79307000  | 3.87210400  | -2.16302800 | H  | 5.85083600  | 2.75099600  | 1.43894300  |
| H | -5.12338000  | 3.98009400  | -2.82678500 | H  | 4.33986300  | 2.45487000  | 0.59315800  |
| H | -2.40970300  | 2.38011500  | -3.23924200 | O  | 4.49074500  | 1.50283000  | 2.34685700  |
| H | -0.83153200  | 1.69293600  | -2.84169500 | H  | 5.15527900  | 1.16368400  | 2.93355500  |
| O | -1.84978100  | 2.49654200  | -1.26678500 | O  | 4.96452300  | -2.54268700 | -0.79344000 |
| H | -8.23529600  | -0.58175400 | -1.96017700 | H  | 4.14551700  | -2.39059300 | -1.25058900 |
| H | -3.98479300  | 1.01039900  | -0.94359400 | C  | 9.86382100  | -0.00681000 | 1.44627300  |
| H | -4.53229100  | -1.38808200 | -2.67730500 | C  | 9.88465300  | 1.36194000  | 1.23688300  |
| O | -1.30179100  | -2.36099200 | -0.55811200 | C  | 10.99603400 | -0.65951200 | 1.91544500  |
| H | -0.29605000  | 3.97142000  | 0.13689100  | C  | 11.05425100 | 2.06818400  | 1.48444100  |
| O | -5.78783600  | -0.77180200 | -1.19917600 | H  | 9.00531300  | 1.87805100  | 0.90662100  |
| H | -4.10936100  | 3.06371200  | -0.34991900 | C  | 12.14892600 | 0.05770900  | 2.16723300  |
| H | -2.12401400  | -2.10109700 | -2.39571100 | H  | 10.95252800 | -1.72125800 | 2.07240400  |

|   |             |             |             |   |             |             |             |
|---|-------------|-------------|-------------|---|-------------|-------------|-------------|
| C | 12.18774300 | 1.42809600  | 1.94869400  | H | -3.17156700 | 4.02063000  | -2.82630600 |
| H | 11.06693800 | 3.13054800  | 1.31740100  | H | -2.75917300 | 3.13625800  | 0.87872800  |
| H | 13.02198600 | -0.45511500 | 2.52967400  | O | -4.73020700 | 3.84768300  | -1.61203600 |
| H | 13.08692300 | 1.98453500  | 2.14104400  | O | -4.97650200 | 3.92226100  | 1.98491700  |
| H | -0.15677100 | -0.71969000 | -2.03767600 | H | -4.40571700 | 4.30024900  | 2.64302300  |
| N | 7.82932500  | -2.53575900 | -0.84064500 | O | -2.35577100 | 4.98975100  | 1.52322200  |
| H | 7.89682500  | -3.47803200 | -0.53488000 | H | -2.24237200 | 5.84006100  | 1.11377800  |
| C | 8.98397800  | -3.37040700 | -2.79877200 | O | -2.67255800 | 5.80690500  | -1.10513400 |
| H | 8.23315700  | -3.99613800 | -3.27162400 | H | -3.57316600 | 6.00482900  | -1.32888700 |
| H | 9.62381900  | -2.95889400 | -3.56551400 | O | -5.93790200 | 0.24034400  | -2.42717100 |
| H | 9.56866800  | -3.98878700 | -2.12737100 | H | -6.57733600 | 0.67236600  | -1.87295600 |
| N | 1.63060100  | 1.51431100  | 0.81145500  | O | -3.37346600 | -1.23038100 | 0.63395200  |
| H | 2.20746800  | 1.31857100  | 1.60011600  | H | -2.62655000 | -0.63999000 | 0.55351700  |
| C | 1.40946400  | 3.74550700  | 1.75973700  | O | -8.54548900 | -4.07157300 | 0.39875300  |
| H | 1.88837000  | 4.61797000  | 1.33157800  | H | -7.91910000 | -4.69086100 | 0.75346000  |
| H | 0.45810200  | 4.06254600  | 2.17025000  | O | -9.38693900 | -2.14646500 | 2.20219100  |
| H | 2.03313800  | 3.34341100  | 2.54769400  | H | -9.76959000 | -2.98482800 | 1.96998700  |
| C | 1.13376000  | 2.75905700  | 0.65019400  | O | -7.11991900 | -2.09373600 | 3.94475400  |
| O | 0.50069900  | 3.07455200  | -0.32818500 | H | -8.01749300 | -1.89795900 | 4.18487600  |
| C | 8.29633900  | -2.23415400 | -2.07426600 | H | -6.43452300 | -3.55865300 | -0.93786400 |
| O | 8.16705700  | -1.14570000 | -2.57158500 | C | -4.71968200 | -3.57457400 | 3.05766700  |
| C | -8.06481000 | -2.13152400 | 1.73362000  | H | -4.73099400 | -3.10212300 | 4.03495800  |
| C | -7.95840100 | -2.78956500 | 0.36024200  | C | -3.35073800 | 1.54135900  | -2.91857700 |
| C | -6.50003200 | -2.91284500 | -0.07007400 | O | -3.43539600 | -3.57121800 | 2.50634800  |
| C | -5.72721500 | -2.86309600 | 2.17334900  | H | -3.24904600 | -2.71521300 | 2.13566800  |
| C | -7.13897000 | -2.80761300 | 2.74318000  | H | -5.00688200 | -4.61209300 | 3.18103500  |
| H | -7.77388900 | -1.09154600 | 1.65828800  | H | -7.00614200 | 4.60546500  | -0.56698000 |
| H | -5.38479400 | -1.85150600 | 2.00330500  | H | -7.12942800 | 3.27767800  | 0.57914700  |
| H | -7.48957500 | -3.82481100 | 2.92190700  | O | -7.24396300 | 2.71842800  | -1.34814100 |
| O | -5.77895900 | -3.55512400 | 0.93143300  | H | -6.89233500 | 2.98008800  | -2.18973600 |
| C | -4.89267200 | -1.56275900 | -1.20772900 | H | -4.24068600 | 1.92808100  | -3.39430700 |
| C | -3.57188800 | -1.96667300 | -0.54227500 | H | -2.51822800 | 1.60685700  | -3.61114100 |
| C | -4.81767300 | -0.11588100 | -1.67216100 | O | -3.04137300 | 2.29047500  | -1.76190500 |
| C | -2.44017800 | -1.71929200 | -1.53541800 | H | -8.51514900 | -2.21935700 | -0.36927900 |
| H | -3.58484100 | -3.01694400 | -0.28584000 | H | -4.72306600 | 0.50182400  | -0.79228800 |
| C | -3.59208700 | 0.08830900  | -2.56227900 | H | -5.05979500 | -2.19830600 | -2.07675500 |
| H | -3.75638000 | -0.45039400 | -3.49504600 | O | -1.24989200 | -2.02564300 | -0.88993900 |
| O | -2.42494400 | -0.38695000 | -1.93803000 | H | -1.49792000 | 4.18950200  | -0.91980500 |
| C | -6.71348800 | 3.57725600  | -0.37035200 | O | -6.00943400 | -1.65463100 | -0.36021500 |
| C | -5.20322800 | 3.46508600  | -0.32615800 | H | -4.94666100 | 2.43327100  | -0.13753400 |
| C | -4.52178700 | 4.32453900  | 0.72733800  | H | -2.55373000 | -2.35602300 | -2.41128000 |
| C | -3.36477200 | 3.63332500  | -1.83392900 |   |             |             |             |
| C | -3.00965100 | 4.15331900  | 0.60520100  |   |             |             |             |
| H | -4.77795100 | 5.37070200  | 0.55734700  |   |             |             |             |
| C | -2.54439200 | 4.42802700  | -0.82314900 |   |             |             |             |
